# Supplementary material for: De Novo Transcriptome Assembly (NGS) of Curcuma longa L. Rhizome Reveals Novel Transcripts Related to Anticancer and Antimalarial Terpenoids
Source: PLoS One. 2013 Feb 28;8(2):e56217. doi: 10.1371/journal.pone.0056217 (PMC3585318; doi:10.1371/journal.pone.0056217)
Supplement: File S1 — BLAST against Curcuma longa nucleotide sequences. The table lists the best hit for each RT, with similarity to Curcuma longa ESTs. (XLS) [file pone.0056217.s001.xls]

## Sheet: Sheet1
Transcript	Transcript length	EST ID	EST length	% Identity	Alignment length	Mismatches	Gaps	Transcript start	Transcript end	EST start	EST end	E-value	Bit score
10004_Transcript_1/1_Confidence_1.000_Length_487_45	487	gi|87143257|gb|DY387868.1|DY387868	868	99.38	487	3	0	1	487	56	542	0	883
10004_Transcript_1/1_Confidence_1.000_Length_487_45	487	gi|87148458|gb|DY393069.1|DY393069	822	99.05	420	4	0	66	485	10	429	0	754
10026_Transcript_8/10_Confidence_0.452_Length_1387_45	1387	gi|87141930|gb|DY386541.1|DY386541	752	93.96	646	35	4	744	1387	1	644	0	974
10026_Transcript_8/10_Confidence_0.452_Length_1387_45	1387	gi|87139811|gb|DY384422.1|DY384422	753	84.41	449	66	4	780	1226	47	493	9e-123	438
10026_Transcript_8/10_Confidence_0.452_Length_1387_45	1387	gi|87141932|gb|DY386543.1|DY386543	686	92.48	226	16	1	1163	1387	686	461	1e-87	322
10026_Transcript_8/10_Confidence_0.452_Length_1387_45	1387	gi|87141931|gb|DY386542.1|DY386542	720	93.96	182	11	0	1206	1387	720	539	8e-74	276
10026_Transcript_8/10_Confidence_0.452_Length_1387_45	1387	gi|87145596|gb|DY390207.1|DY390207	622	100	78	0	0	1310	1387	622	545	2e-34	145
10026_Transcript_8/10_Confidence_0.452_Length_1387_45	1387	gi|87146904|gb|DY391515.1|DY391515	723	93.18	88	6	0	1300	1387	671	584	6e-30	130
10042_Transcript_1/2_Confidence_1.000_Length_1108_45	1108	gi|87145667|gb|DY390278.1|DY390278	708	99.39	652	4	0	1	652	57	708	0	1182
10046_Transcript_3/4_Confidence_0.667_Length_718_45	718	gi|87143875|gb|DY388486.1|DY388486	706	88.19	432	45	6	287	715	514	86	1e-144	510
10058_Transcript_2/5_Confidence_0.714_Length_1771_45	1771	gi|87139296|gb|DY383907.1|DY383907	483	92.02	501	21	12	126	625	483	1	0	686
10058_Transcript_2/5_Confidence_0.714_Length_1771_45	1771	gi|87139297|gb|DY383908.1|DY383908	491	91.8	500	24	11	126	625	1	483	0	680
10058_Transcript_4/5_Confidence_0.714_Length_2182_45	2182	gi|87139296|gb|DY383907.1|DY383907	483	92.02	501	21	12	126	625	483	1	0	686
10058_Transcript_4/5_Confidence_0.714_Length_2182_45	2182	gi|87139297|gb|DY383908.1|DY383908	491	91.8	500	24	11	126	625	1	483	0	680
10060_Transcript_1/1_Confidence_1.000_Length_386_45	386	gi|87148400|gb|DY393011.1|DY393011	822	97.67	387	7	2	1	386	619	234	0	664
10060_Transcript_1/1_Confidence_1.000_Length_386_45	386	gi|87148401|gb|DY393012.1|DY393012	807	97.71	349	6	2	1	348	460	807	1e-171	599
10060_Transcript_1/1_Confidence_1.000_Length_386_45	386	gi|87150258|gb|DY394869.1|DY394869	660	92.01	388	25	6	1	386	567	184	7e-154	540
10076_Transcript_2/2_Confidence_1.000_Length_374_45	374	gi|87146826|gb|DY391437.1|DY391437	494	100	371	0	0	1	371	122	492	0	686
10076_Transcript_2/2_Confidence_1.000_Length_374_45	374	gi|87146827|gb|DY391438.1|DY391438	501	99.46	369	2	0	1	369	371	3	0	671
10076_Transcript_2/2_Confidence_1.000_Length_374_45	374	gi|87146311|gb|DY390922.1|DY390922	492	96.26	348	11	2	1	347	127	473	8e-163	569
10076_Transcript_2/2_Confidence_1.000_Length_374_45	374	gi|87146312|gb|DY390923.1|DY390923	482	96.26	348	11	2	1	347	366	20	8e-163	569
10076_Transcript_2/2_Confidence_1.000_Length_374_45	374	gi|87141268|gb|DY385879.1|DY385879	761	92.12	203	14	2	146	347	207	6	3e-77	285
10076_Transcript_2/2_Confidence_1.000_Length_374_45	374	gi|87141268|gb|DY385879.1|DY385879	761	95.92	147	4	2	1	146	739	594	9e-63	237
10076_Transcript_2/2_Confidence_1.000_Length_374_45	374	gi|87141267|gb|DY385878.1|DY385878	791	97.26	146	4	0	1	146	128	273	4e-66	248
10076_Transcript_2/2_Confidence_1.000_Length_374_45	374	gi|87141267|gb|DY385878.1|DY385878	791	92.48	133	8	2	146	277	660	791	3e-48	189
10090_Transcript_1/1_Confidence_1.000_Length_1335_45	1335	gi|87143414|gb|DY388025.1|DY388025	912	95.72	912	36	3	186	1096	3	912	0	1465
10090_Transcript_1/1_Confidence_1.000_Length_1335_45	1335	gi|87142721|gb|DY387332.1|DY387332	733	95.13	698	33	1	4	701	37	733	0	1099
10090_Transcript_1/1_Confidence_1.000_Length_1335_45	1335	gi|87143863|gb|DY388474.1|DY388474	636	91.26	549	46	2	788	1335	66	613	0	747
10090_Transcript_1/1_Confidence_1.000_Length_1335_45	1335	gi|87142220|gb|DY386831.1|DY386831	509	85.82	529	39	25	129	650	3	502	5e-150	529
10090_Transcript_1/1_Confidence_1.000_Length_1335_45	1335	gi|87143862|gb|DY388473.1|DY388473	772	92	350	28	0	986	1335	771	422	7e-139	492
10101_Transcript_1/1_Confidence_1.000_Length_677_45	677	gi|87140016|gb|DY384627.1|DY384627	573	88.14	59	5	2	540	597	2	59	7e-12	69.4
10213_Transcript_3/3_Confidence_0.500_Length_1874_45	1874	gi|87148525|gb|DY393136.1|DY393136	793	85.22	521	73	4	542	1060	238	756	6e-151	532
10266_Transcript_1/2_Confidence_1.000_Length_698_45	698	gi|87143956|gb|DY388567.1|DY388567	842	90.83	665	50	8	1	659	679	20	0	880
10266_Transcript_1/2_Confidence_1.000_Length_698_45	698	gi|87143957|gb|DY388568.1|DY388568	765	91.82	587	40	7	1	583	167	749	0	811
10266_Transcript_1/2_Confidence_1.000_Length_698_45	698	gi|87139453|gb|DY384064.1|DY384064	772	91.31	587	43	8	1	583	627	45	0	795
10266_Transcript_1/2_Confidence_1.000_Length_698_45	698	gi|87139454|gb|DY384065.1|DY384065	772	91.27	401	28	7	1	397	373	770	1e-153	540
10267_Transcript_1/1_Confidence_1.000_Length_411_45	411	gi|87146859|gb|DY391470.1|DY391470	748	81.9	315	35	16	102	408	648	348	2e-65	246
10267_Transcript_1/1_Confidence_1.000_Length_411_45	411	gi|87146860|gb|DY391471.1|DY391471	749	81.9	315	35	16	102	408	217	517	2e-65	246
10277_Transcript_11/11_Confidence_0.676_Length_2341_45	2341	gi|87150391|gb|DY395002.1|DY395002	744	95.6	750	18	5	66	815	744	10	0	1188
10277_Transcript_11/11_Confidence_0.676_Length_2341_45	2341	gi|87150392|gb|DY395003.1|DY395003	683	94.93	691	18	7	126	815	1	675	0	1066
10289_Transcript_1/1_Confidence_1.000_Length_411_45	411	gi|87149165|gb|DY393776.1|DY393776	824	99.76	411	1	0	1	411	538	128	0	754
10289_Transcript_1/1_Confidence_1.000_Length_411_45	411	gi|87149164|gb|DY393775.1|DY393775	759	99.63	271	1	0	1	271	489	759	2e-140	496
10289_Transcript_1/1_Confidence_1.000_Length_411_45	411	gi|87139000|gb|DY383611.1|DY383611	605	88.7	345	21	12	1	342	251	580	3e-113	405
10322_Transcript_1/2_Confidence_1.000_Length_555_45	555	gi|87139174|gb|DY383785.1|DY383785	752	97.73	44	1	0	512	555	535	578	3e-14	76.8
10322_Transcript_1/2_Confidence_1.000_Length_555_45	555	gi|87141078|gb|DY385689.1|DY385689	777	97.73	44	1	0	512	555	413	456	3e-14	76.8
10322_Transcript_1/2_Confidence_1.000_Length_555_45	555	gi|87141757|gb|DY386368.1|DY386368	687	97.73	44	1	0	512	555	400	357	3e-14	76.8
10322_Transcript_1/2_Confidence_1.000_Length_555_45	555	gi|87141758|gb|DY386369.1|DY386369	802	97.73	44	1	0	512	555	514	557	3e-14	76.8
10322_Transcript_1/2_Confidence_1.000_Length_555_45	555	gi|87142213|gb|DY386824.1|DY386824	861	97.73	44	1	0	512	555	406	363	3e-14	76.8
10322_Transcript_1/2_Confidence_1.000_Length_555_45	555	gi|87142282|gb|DY386893.1|DY386893	786	97.73	44	1	0	512	555	513	556	3e-14	76.8
10326_Transcript_1/2_Confidence_1.000_Length_1221_45	1221	gi|87147333|gb|DY391944.1|DY391944	602	84.64	306	12	22	802	1089	293	5	9e-73	272
10326_Transcript_1/2_Confidence_1.000_Length_1221_45	1221	gi|87147333|gb|DY391944.1|DY391944	602	96.15	52	2	0	758	809	375	324	1e-16	86.1
10326_Transcript_1/2_Confidence_1.000_Length_1221_45	1221	gi|87147333|gb|DY391944.1|DY391944	602	91.38	58	1	3	680	735	476	421	7e-14	76.8
10326_Transcript_1/2_Confidence_1.000_Length_1221_45	1221	gi|87145731|gb|DY390342.1|DY390342	602	84.72	301	12	21	802	1084	293	9	3e-72	270
10326_Transcript_1/2_Confidence_1.000_Length_1221_45	1221	gi|87145731|gb|DY390342.1|DY390342	602	96.15	52	2	0	758	809	375	324	1e-16	86.1
10326_Transcript_1/2_Confidence_1.000_Length_1221_45	1221	gi|87145731|gb|DY390342.1|DY390342	602	91.38	58	1	3	680	735	476	421	7e-14	76.8
10326_Transcript_1/2_Confidence_1.000_Length_1221_45	1221	gi|87145732|gb|DY390343.1|DY390343	578	84.72	301	12	21	802	1084	286	570	3e-72	270
10326_Transcript_1/2_Confidence_1.000_Length_1221_45	1221	gi|87145732|gb|DY390343.1|DY390343	578	96.15	52	2	0	758	809	204	255	1e-16	86.1
10326_Transcript_1/2_Confidence_1.000_Length_1221_45	1221	gi|87145732|gb|DY390343.1|DY390343	578	91.38	58	1	3	680	735	103	158	7e-14	76.8
10326_Transcript_1/2_Confidence_1.000_Length_1221_45	1221	gi|87147334|gb|DY391945.1|DY391945	578	84.72	301	12	21	802	1084	286	570	3e-72	270
10326_Transcript_1/2_Confidence_1.000_Length_1221_45	1221	gi|87147334|gb|DY391945.1|DY391945	578	96.15	52	2	0	758	809	204	255	1e-16	86.1
10326_Transcript_1/2_Confidence_1.000_Length_1221_45	1221	gi|87147334|gb|DY391945.1|DY391945	578	91.38	58	1	3	680	735	103	158	7e-14	76.8
10354_Transcript_1/1_Confidence_1.000_Length_2971_45	2971	gi|87138540|gb|DY383151.1|DY383151	612	96.29	512	18	1	100	611	520	10	0	839
10354_Transcript_1/1_Confidence_1.000_Length_2971_45	2971	gi|87138544|gb|DY383155.1|DY383155	611	96.29	512	18	1	100	611	92	602	0	839
1037_Transcript_2/3_Confidence_0.867_Length_1152_45	1152	gi|87146613|gb|DY391224.1|DY391224	718	98.72	705	8	1	415	1118	9	713	0	1251
1037_Transcript_2/3_Confidence_0.867_Length_1152_45	1152	gi|87146613|gb|DY391224.1|DY391224	718	100	33	0	0	740	772	289	321	2e-09	62.1
1037_Transcript_2/3_Confidence_0.867_Length_1152_45	1152	gi|87146613|gb|DY391224.1|DY391224	718	100	33	0	0	695	727	334	366	2e-09	62.1
1037_Transcript_2/3_Confidence_0.867_Length_1152_45	1152	gi|87146614|gb|DY391225.1|DY391225	697	98.14	698	11	2	417	1113	697	1	0	1216
1037_Transcript_2/3_Confidence_0.867_Length_1152_45	1152	gi|87146614|gb|DY391225.1|DY391225	697	100	33	0	0	695	727	374	342	2e-09	62.1
1037_Transcript_2/3_Confidence_0.867_Length_1152_45	1152	gi|87146614|gb|DY391225.1|DY391225	697	100	33	0	0	740	772	419	387	2e-09	62.1
1037_Transcript_2/3_Confidence_0.867_Length_1152_45	1152	gi|87146244|gb|DY390855.1|DY390855	647	98.23	282	5	0	769	1050	282	1	2e-139	494
1037_Transcript_2/3_Confidence_0.867_Length_1152_45	1152	gi|87146243|gb|DY390854.1|DY390854	734	96.74	92	1	2	770	859	643	734	1e-36	152
1037_Transcript_2/3_Confidence_0.867_Length_1152_45	1152	gi|87150608|gb|DY395219.1|DY395219	681	96.1	77	3	0	1040	1116	1	77	7e-29	126
10412_Transcript_3/3_Confidence_0.600_Length_1250_45	1250	gi|87138292|gb|DY382903.1|DY382903	378	94.44	342	17	2	850	1190	3	343	6e-149	525
10412_Transcript_3/3_Confidence_0.600_Length_1250_45	1250	gi|87138297|gb|DY382908.1|DY382908	386	94.44	342	17	2	850	1190	376	36	6e-149	525
10431_Transcript_1/1_Confidence_1.000_Length_479_45	479	gi|87147098|gb|DY391709.1|DY391709	762	100	55	0	0	1	55	708	762	5e-22	102
10512_Transcript_2/2_Confidence_1.000_Length_616_45	616	gi|87143279|gb|DY387890.1|DY387890	639	92.65	313	15	5	1	306	281	592	9e-125	444
10512_Transcript_2/2_Confidence_1.000_Length_616_45	616	gi|87143224|gb|DY387835.1|DY387835	615	89.49	314	24	7	1	306	327	15	4e-108	388
10512_Transcript_2/2_Confidence_1.000_Length_616_45	616	gi|87143225|gb|DY387836.1|DY387836	643	89.49	314	24	6	1	306	352	40	4e-108	388
1052_Transcript_4/4_Confidence_0.850_Length_5403_45	5403	gi|87149904|gb|DY394515.1|DY394515	793	92.41	791	44	13	4359	5140	10	793	0	1114
1052_Transcript_4/4_Confidence_0.850_Length_5403_45	5403	gi|87141385|gb|DY385996.1|DY385996	638	92.94	609	36	6	4689	5293	638	33	0	880
1052_Transcript_4/4_Confidence_0.850_Length_5403_45	5403	gi|87141022|gb|DY385633.1|DY385633	867	84.23	875	103	31	3669	4528	11	865	0	819
1052_Transcript_4/4_Confidence_0.850_Length_5403_45	5403	gi|87141023|gb|DY385634.1|DY385634	642	83.15	267	29	10	4656	4920	619	367	2e-59	230
105_Transcript_3/4_Confidence_0.571_Length_2900_45	2900	gi|87147736|gb|DY392347.1|DY392347	698	77.78	324	46	26	289	600	516	207	2e-43	176
105_Transcript_3/4_Confidence_0.571_Length_2900_45	2900	gi|87147737|gb|DY392348.1|DY392348	575	77.78	324	46	26	289	600	70	379	2e-43	176
105_Transcript_3/4_Confidence_0.571_Length_2900_45	2900	gi|87146481|gb|DY391092.1|DY391092	768	79.08	282	32	22	880	1147	86	354	3e-41	169
10617_Transcript_1/1_Confidence_1.000_Length_293_45	293	gi|87138864|gb|DY383475.1|DY383475	613	98.51	201	3	0	88	288	7	207	2e-98	355
10638_Transcript_1/1_Confidence_1.000_Length_817_45	817	gi|87141323|gb|DY385934.1|DY385934	673	92.42	673	42	5	146	816	673	8	0	952
10638_Transcript_1/1_Confidence_1.000_Length_817_45	817	gi|87143004|gb|DY387615.1|DY387615	827	94.08	574	31	3	176	746	827	254	0	869
10638_Transcript_1/1_Confidence_1.000_Length_817_45	817	gi|87143003|gb|DY387614.1|DY387614	743	93.54	557	32	4	1	555	187	741	0	826
10669_Transcript_1/1_Confidence_1.000_Length_885_45	885	gi|87140931|gb|DY385542.1|DY385542	877	86.25	160	12	6	728	885	556	405	1e-40	165
1066_Transcript_1/10_Confidence_0.593_Length_2103_45	2103	gi|87147387|gb|DY391998.1|DY391998	884	85.39	308	35	10	1798	2100	1	303	3e-84	311
1066_Transcript_3/10_Confidence_0.593_Length_2278_45	2278	gi|87147387|gb|DY391998.1|DY391998	884	85.39	308	35	10	1973	2275	1	303	3e-84	311
1066_Transcript_6/10_Confidence_0.593_Length_2635_45	2635	gi|87147387|gb|DY391998.1|DY391998	884	85.39	308	35	10	2330	2632	1	303	4e-84	311
10727_Transcript_1/1_Confidence_1.000_Length_1179_45	1179	gi|87140560|gb|DY385171.1|DY385171	783	95.78	782	27	4	402	1177	783	2	0	1256
10727_Transcript_1/1_Confidence_1.000_Length_1179_45	1179	gi|87140561|gb|DY385172.1|DY385172	710	96.05	709	22	4	475	1177	710	2	0	1149
10727_Transcript_1/1_Confidence_1.000_Length_1179_45	1179	gi|87143286|gb|DY387897.1|DY387897	458	94.12	459	19	5	721	1172	458	1	0	691
10748_Transcript_1/1_Confidence_1.000_Length_604_45	604	gi|87139622|gb|DY384233.1|DY384233	861	82.73	139	20	4	19	155	391	255	2e-27	121
10865_Transcript_1/2_Confidence_1.000_Length_757_45	757	gi|87144487|gb|DY389098.1|DY389098	745	99.64	281	0	1	315	595	222	501	3e-145	512
10865_Transcript_1/2_Confidence_1.000_Length_757_45	757	gi|87144487|gb|DY389098.1|DY389098	745	96.85	222	4	2	16	234	1	222	7e-102	368
10865_Transcript_1/2_Confidence_1.000_Length_757_45	757	gi|87144487|gb|DY389098.1|DY389098	745	100	37	0	0	721	757	497	533	8e-12	69.4
10865_Transcript_1/2_Confidence_1.000_Length_757_45	757	gi|87149518|gb|DY394129.1|DY394129	900	98.93	187	2	0	315	501	714	900	7e-92	335
10865_Transcript_1/2_Confidence_1.000_Length_757_45	757	gi|87149518|gb|DY394129.1|DY394129	900	100	143	0	0	92	234	572	714	9e-71	265
10865_Transcript_1/2_Confidence_1.000_Length_757_45	757	gi|87141128|gb|DY385739.1|DY385739	673	82.61	115	15	5	100	211	114	226	3e-20	97.1
10865_Transcript_1/2_Confidence_1.000_Length_757_45	757	gi|87138413|gb|DY383024.1|DY383024	749	81.9	116	13	8	94	205	117	228	2e-18	91.6
10865_Transcript_1/2_Confidence_1.000_Length_757_45	757	gi|87145113|gb|DY389724.1|DY389724	574	81.74	115	16	5	100	211	82	194	2e-18	91.6
10870_Transcript_1/2_Confidence_1.000_Length_780_45	780	gi|87143277|gb|DY387888.1|DY387888	741	88.74	693	50	16	53	737	673	1	0	822
10895_Transcript_2/3_Confidence_0.714_Length_663_45	663	gi|87142370|gb|DY386981.1|DY386981	748	96.97	33	1	0	377	409	392	360	5e-08	56.5
10900_Transcript_1/1_Confidence_1.000_Length_847_45	847	gi|87147411|gb|DY392022.1|DY392022	857	93.04	733	44	7	1	730	129	857	0	1064
10900_Transcript_1/1_Confidence_1.000_Length_847_45	847	gi|87147412|gb|DY392023.1|DY392023	753	93.01	701	40	9	150	846	753	58	0	1014
10900_Transcript_1/1_Confidence_1.000_Length_847_45	847	gi|87147666|gb|DY392277.1|DY392277	690	78.74	414	60	26	136	535	198	597	8e-67	252
10900_Transcript_1/1_Confidence_1.000_Length_847_45	847	gi|87147667|gb|DY392278.1|DY392278	729	77.37	411	65	28	139	535	729	333	8e-57	219
10939_Transcript_4/7_Confidence_0.389_Length_810_45	810	gi|87148564|gb|DY393175.1|DY393175	771	100	133	0	0	274	406	771	639	3e-65	246
10939_Transcript_6/7_Confidence_0.278_Length_1166_45	1166	gi|87142718|gb|DY387329.1|DY387329	816	92.06	126	7	3	1033	1155	184	59	2e-43	174
10939_Transcript_6/7_Confidence_0.278_Length_1166_45	1166	gi|87142719|gb|DY387330.1|DY387330	823	92.06	126	7	3	1033	1155	184	59	2e-43	174
10939_Transcript_6/7_Confidence_0.278_Length_1166_45	1166	gi|87142716|gb|DY387327.1|DY387327	850	98.33	60	1	0	977	1036	309	368	9e-23	106
10939_Transcript_6/7_Confidence_0.278_Length_1166_45	1166	gi|87142717|gb|DY387328.1|DY387328	751	98.33	60	1	0	977	1036	295	354	9e-23	106
10968_Transcript_1/1_Confidence_1.000_Length_1235_45	1235	gi|87143398|gb|DY388009.1|DY388009	817	96.68	813	27	0	46	858	1	813	0	1352
10968_Transcript_1/1_Confidence_1.000_Length_1235_45	1235	gi|87143397|gb|DY388008.1|DY388008	497	90.91	165	10	5	866	1027	496	334	4e-56	217
11001_Transcript_1/1_Confidence_1.000_Length_255_45	255	gi|87143363|gb|DY387974.1|DY387974	710	95.97	248	10	0	8	255	12	259	6e-113	403
1108_Transcript_2/4_Confidence_0.500_Length_2155_45	2155	gi|87146689|gb|DY391300.1|DY391300	756	95.2	771	14	6	1309	2079	1	748	0	1197
1108_Transcript_2/4_Confidence_0.500_Length_2155_45	2155	gi|87146688|gb|DY391299.1|DY391299	756	95.07	771	15	6	1309	2079	756	9	0	1192
1108_Transcript_2/4_Confidence_0.500_Length_2155_45	2155	gi|87141597|gb|DY386208.1|DY386208	681	95.81	668	26	2	1197	1863	1	667	0	1077
1108_Transcript_2/4_Confidence_0.500_Length_2155_45	2155	gi|87141598|gb|DY386209.1|DY386209	780	95.78	616	24	2	1254	1868	780	166	0	992
1108_Transcript_2/4_Confidence_0.500_Length_2155_45	2155	gi|87145720|gb|DY390331.1|DY390331	551	94.38	569	9	6	1518	2086	551	6	0	852
1108_Transcript_2/4_Confidence_0.500_Length_2155_45	2155	gi|87145721|gb|DY390332.1|DY390332	546	94.08	557	9	7	1530	2086	1	533	0	824
11091_Transcript_3/3_Confidence_0.667_Length_899_45	899	gi|87139964|gb|DY384575.1|DY384575	820	94.81	385	18	2	219	602	678	295	3e-171	599
11145_Transcript_1/1_Confidence_1.000_Length_557_45	557	gi|87145855|gb|DY390466.1|DY390466	617	99.41	507	1	2	1	506	80	585	0	918
11145_Transcript_1/1_Confidence_1.000_Length_557_45	557	gi|87147973|gb|DY392584.1|DY392584	726	97.66	128	2	1	431	557	726	599	5e-57	219
11278_Transcript_1/1_Confidence_1.000_Length_1467_45	1467	gi|87143649|gb|DY388260.1|DY388260	838	99.39	814	4	1	69	881	837	24	0	1474
11278_Transcript_1/1_Confidence_1.000_Length_1467_45	1467	gi|87143650|gb|DY388261.1|DY388261	775	98.32	776	11	2	71	846	2	775	0	1360
11278_Transcript_1/1_Confidence_1.000_Length_1467_45	1467	gi|87148353|gb|DY392964.1|DY392964	787	99.32	736	3	2	10	745	1	734	0	1330
11278_Transcript_1/1_Confidence_1.000_Length_1467_45	1467	gi|87148352|gb|DY392963.1|DY392963	817	99.26	537	4	0	209	745	817	281	0	970
112_Transcript_1/1_Confidence_1.000_Length_1355_45	1355	gi|87143364|gb|DY387975.1|DY387975	738	98.52	741	8	2	290	1030	1	738	0	1304
112_Transcript_1/1_Confidence_1.000_Length_1355_45	1355	gi|87143365|gb|DY387976.1|DY387976	753	97.75	756	13	3	565	1319	753	1	0	1299
112_Transcript_1/1_Confidence_1.000_Length_1355_45	1355	gi|87146056|gb|DY390667.1|DY390667	730	98.75	722	5	3	38	758	9	727	0	1280
112_Transcript_1/1_Confidence_1.000_Length_1355_45	1355	gi|87143930|gb|DY388541.1|DY388541	740	98.48	725	11	0	613	1337	10	734	0	1279
112_Transcript_1/1_Confidence_1.000_Length_1355_45	1355	gi|87146019|gb|DY390630.1|DY390630	743	97.56	739	16	2	39	776	6	743	0	1264
112_Transcript_1/1_Confidence_1.000_Length_1355_45	1355	gi|87146020|gb|DY390631.1|DY390631	711	98.17	712	12	1	523	1234	711	1	0	1242
112_Transcript_1/1_Confidence_1.000_Length_1355_45	1355	gi|87143931|gb|DY388542.1|DY388542	697	98.28	697	12	0	618	1314	697	1	0	1221
112_Transcript_1/1_Confidence_1.000_Length_1355_45	1355	gi|87138604|gb|DY383215.1|DY383215	864	93.74	799	45	4	558	1355	864	70	0	1194
112_Transcript_1/1_Confidence_1.000_Length_1355_45	1355	gi|87140543|gb|DY385154.1|DY385154	817	93.35	737	42	6	621	1355	817	86	0	1083
112_Transcript_1/1_Confidence_1.000_Length_1355_45	1355	gi|87146057|gb|DY390668.1|DY390668	616	98.06	619	8	3	705	1322	616	1	0	1074
112_Transcript_1/1_Confidence_1.000_Length_1355_45	1355	gi|87138603|gb|DY383214.1|DY383214	760	93.83	713	34	7	86	792	52	760	0	1064
112_Transcript_1/1_Confidence_1.000_Length_1355_45	1355	gi|87143511|gb|DY388122.1|DY388122	782	94.08	693	36	4	664	1355	777	89	0	1048
112_Transcript_1/1_Confidence_1.000_Length_1355_45	1355	gi|87141313|gb|DY385924.1|DY385924	764	93.98	681	35	4	664	1344	759	85	0	1026
112_Transcript_1/1_Confidence_1.000_Length_1355_45	1355	gi|87142628|gb|DY387239.1|DY387239	691	92.92	692	44	4	461	1151	4	691	0	1002
112_Transcript_1/1_Confidence_1.000_Length_1355_45	1355	gi|87140542|gb|DY385153.1|DY385153	690	92.33	691	45	7	588	1275	5	690	0	976
112_Transcript_1/1_Confidence_1.000_Length_1355_45	1355	gi|87142626|gb|DY387237.1|DY387237	618	93.71	588	35	2	769	1355	618	32	0	880
112_Transcript_1/1_Confidence_1.000_Length_1355_45	1355	gi|87141312|gb|DY385923.1|DY385923	562	93.06	562	31	6	623	1182	1	556	0	815
112_Transcript_1/1_Confidence_1.000_Length_1355_45	1355	gi|87138778|gb|DY383389.1|DY383389	474	91.43	467	26	8	32	485	9	474	5e-180	628
112_Transcript_1/1_Confidence_1.000_Length_1355_45	1355	gi|87143864|gb|DY388475.1|DY388475	661	87.8	328	34	6	141	465	588	264	6e-105	379
112_Transcript_1/1_Confidence_1.000_Length_1355_45	1355	gi|87143865|gb|DY388476.1|DY388476	639	87.8	328	34	6	141	465	52	376	6e-105	379
112_Transcript_1/1_Confidence_1.000_Length_1355_45	1355	gi|87140176|gb|DY384787.1|DY384787	757	86.93	329	35	8	141	465	80	404	6e-100	363
112_Transcript_1/1_Confidence_1.000_Length_1355_45	1355	gi|87140658|gb|DY385269.1|DY385269	720	82.67	225	35	4	243	465	7	229	6e-50	196
112_Transcript_1/1_Confidence_1.000_Length_1355_45	1355	gi|87140659|gb|DY385270.1|DY385270	841	90	80	8	0	386	465	838	759	4e-22	104
11325_Transcript_1/3_Confidence_0.714_Length_1103_45	1103	gi|87150632|gb|DY395243.1|DY395243	823	98.23	792	12	2	279	1069	823	33	0	1384
11325_Transcript_1/3_Confidence_0.714_Length_1103_45	1103	gi|87150633|gb|DY395244.1|DY395244	607	96.88	576	16	2	495	1069	607	33	0	963
11337_Transcript_3/3_Confidence_0.714_Length_422_45	422	gi|87150024|gb|DY394635.1|DY394635	843	92.15	395	5	12	28	422	743	375	3e-152	534
11365_Transcript_1/1_Confidence_1.000_Length_440_45	440	gi|87143220|gb|DY387831.1|DY387831	792	87.41	405	23	13	45	440	2	387	8e-124	440
11406_Transcript_1/1_Confidence_1.000_Length_590_45	590	gi|87149287|gb|DY393898.1|DY393898	850	100	135	0	0	144	278	565	431	2e-66	250
11406_Transcript_1/1_Confidence_1.000_Length_590_45	590	gi|87149288|gb|DY393899.1|DY393899	751	99.25	134	1	0	15	148	348	481	3e-64	243
11411_Transcript_1/1_Confidence_1.000_Length_885_45	885	gi|87140028|gb|DY384639.1|DY384639	783	91.06	783	41	18	29	787	6	783	0	1031
11411_Transcript_1/1_Confidence_1.000_Length_885_45	885	gi|87140357|gb|DY384968.1|DY384968	809	85.71	469	59	8	364	828	313	777	6e-138	488
11411_Transcript_1/1_Confidence_1.000_Length_885_45	885	gi|87140356|gb|DY384967.1|DY384967	667	86.03	458	56	8	364	817	463	10	7e-137	484
11413_Transcript_1/1_Confidence_1.000_Length_508_45	508	gi|87150614|gb|DY395225.1|DY395225	745	100	508	0	0	1	508	622	115	0	939
11413_Transcript_1/1_Confidence_1.000_Length_508_45	508	gi|87150615|gb|DY395226.1|DY395226	745	100	508	0	0	1	508	124	631	0	939
11429_Transcript_1/1_Confidence_1.000_Length_224_45	224	gi|87145232|gb|DY389843.1|DY389843	503	100	95	0	0	130	224	503	409	1e-44	176
1144_Transcript_3/4_Confidence_0.500_Length_882_45	882	gi|87146443|gb|DY391054.1|DY391054	691	98.12	691	13	0	116	806	691	1	0	1205
1144_Transcript_3/4_Confidence_0.500_Length_882_45	882	gi|87146444|gb|DY391055.1|DY391055	663	97.74	663	15	0	64	726	1	663	0	1142
1144_Transcript_3/4_Confidence_0.500_Length_882_45	882	gi|87143741|gb|DY388352.1|DY388352	788	91.64	801	48	12	11	808	1	785	0	1090
1144_Transcript_3/4_Confidence_0.500_Length_882_45	882	gi|87143740|gb|DY388351.1|DY388351	692	93.33	705	30	10	104	806	690	1	0	1026
1144_Transcript_3/4_Confidence_0.500_Length_882_45	882	gi|87139269|gb|DY383880.1|DY383880	747	90.75	778	37	16	31	806	3	747	0	1005
1144_Transcript_3/4_Confidence_0.500_Length_882_45	882	gi|87139268|gb|DY383879.1|DY383879	688	95.05	626	27	2	182	807	631	10	0	981
11470_Transcript_2/2_Confidence_1.000_Length_394_45	394	gi|87150312|gb|DY394923.1|DY394923	763	98.85	87	1	0	1	87	210	124	3e-38	156
11481_Transcript_2/2_Confidence_1.000_Length_955_45	955	gi|87146416|gb|DY391027.1|DY391027	789	96.1	641	2	9	323	955	33	658	0	1024
11481_Transcript_2/2_Confidence_1.000_Length_955_45	955	gi|87146417|gb|DY391028.1|DY391028	758	95.94	641	3	9	323	955	755	130	0	1018
11486_Transcript_1/1_Confidence_1.000_Length_1071_45	1071	gi|87138743|gb|DY383354.1|DY383354	828	97.36	645	17	0	1	645	645	1	0	1098
11486_Transcript_1/1_Confidence_1.000_Length_1071_45	1071	gi|87138744|gb|DY383355.1|DY383355	802	97.39	115	3	0	1	115	688	802	5e-50	196
1149_Transcript_6/7_Confidence_0.692_Length_2583_45	2583	gi|87138578|gb|DY383189.1|DY383189	777	92.97	256	14	2	123	374	590	335	6e-102	370
1149_Transcript_6/7_Confidence_0.692_Length_2583_45	2583	gi|87138579|gb|DY383190.1|DY383190	770	92.97	256	14	2	123	374	172	427	6e-102	370
11526_Transcript_1/1_Confidence_1.000_Length_429_45	429	gi|87145883|gb|DY390494.1|DY390494	436	89.4	283	24	3	98	380	286	10	4e-97	351
11565_Transcript_3/4_Confidence_0.400_Length_598_45	598	gi|87149336|gb|DY393947.1|DY393947	768	90.32	341	30	3	260	598	1	340	8e-125	444
11587_Transcript_3/4_Confidence_0.667_Length_1141_45	1141	gi|87144270|gb|DY388881.1|DY388881	245	99.55	223	1	0	576	798	15	237	2e-113	407
11587_Transcript_3/4_Confidence_0.667_Length_1141_45	1141	gi|87144269|gb|DY388880.1|DY388880	345	99.1	222	2	0	576	797	231	10	4e-111	399
11587_Transcript_3/4_Confidence_0.667_Length_1141_45	1141	gi|87144269|gb|DY388880.1|DY388880	345	100	33	0	0	543	575	345	313	2e-09	62.1
11587_Transcript_4/4_Confidence_0.667_Length_1204_45	1204	gi|87144270|gb|DY388881.1|DY388881	245	99.55	223	1	0	639	861	15	237	2e-113	407
11587_Transcript_4/4_Confidence_0.667_Length_1204_45	1204	gi|87144269|gb|DY388880.1|DY388880	345	99.1	222	2	0	639	860	231	10	4e-111	399
11587_Transcript_4/4_Confidence_0.667_Length_1204_45	1204	gi|87144269|gb|DY388880.1|DY388880	345	100	33	0	0	606	638	345	313	2e-09	62.1
115_Transcript_1/4_Confidence_0.714_Length_1766_45	1766	gi|87150617|gb|DY395228.1|DY395228	862	95.8	882	12	10	855	1736	858	2	0	1400
115_Transcript_1/4_Confidence_0.714_Length_1766_45	1766	gi|87150617|gb|DY395228.1|DY395228	862	100	44	0	0	811	854	859	816	2e-15	82.4
115_Transcript_1/4_Confidence_0.714_Length_1766_45	1766	gi|87149795|gb|DY394406.1|DY394406	767	95.81	788	8	10	959	1746	763	1	0	1249
115_Transcript_1/4_Confidence_0.714_Length_1766_45	1766	gi|87138242|gb|DY382853.1|DY382853	776	91.08	796	43	17	938	1728	776	4	0	1051
115_Transcript_1/4_Confidence_0.714_Length_1766_45	1766	gi|87138243|gb|DY382854.1|DY382854	879	93.27	713	45	2	3	712	19	731	0	1048
115_Transcript_1/4_Confidence_0.714_Length_1766_45	1766	gi|87138243|gb|DY382854.1|DY382854	879	95.95	148	6	0	855	1002	732	879	4e-63	241
115_Transcript_1/4_Confidence_0.714_Length_1766_45	1766	gi|87138243|gb|DY382854.1|DY382854	879	100	44	0	0	811	854	731	774	2e-15	82.4
115_Transcript_1/4_Confidence_0.714_Length_1766_45	1766	gi|87141197|gb|DY385808.1|DY385808	684	93.52	664	40	2	3	663	21	684	0	985
115_Transcript_1/4_Confidence_0.714_Length_1766_45	1766	gi|87142689|gb|DY387300.1|DY387300	716	90.17	722	40	21	1023	1738	716	20	0	911
115_Transcript_1/4_Confidence_0.714_Length_1766_45	1766	gi|87150616|gb|DY395227.1|DY395227	835	99.18	490	4	0	855	1344	346	835	0	883
115_Transcript_1/4_Confidence_0.714_Length_1766_45	1766	gi|87150616|gb|DY395227.1|DY395227	835	99.7	337	1	0	376	712	9	345	1e-176	617
115_Transcript_1/4_Confidence_0.714_Length_1766_45	1766	gi|87150616|gb|DY395227.1|DY395227	835	100	44	0	0	811	854	345	388	2e-15	82.4
115_Transcript_1/4_Confidence_0.714_Length_1766_45	1766	gi|87147792|gb|DY392403.1|DY392403	467	99.56	458	2	0	898	1355	10	467	0	835
115_Transcript_1/4_Confidence_0.714_Length_1766_45	1766	gi|87147793|gb|DY392404.1|DY392404	448	98.22	449	5	3	901	1349	448	3	0	782
115_Transcript_1/4_Confidence_0.714_Length_1766_45	1766	gi|87148230|gb|DY392841.1|DY392841	787	93.01	515	11	10	1226	1740	6	495	0	728
115_Transcript_1/4_Confidence_0.714_Length_1766_45	1766	gi|87148231|gb|DY392842.1|DY392842	863	92.77	498	10	11	1244	1740	863	391	0	697
115_Transcript_1/4_Confidence_0.714_Length_1766_45	1766	gi|87142632|gb|DY387243.1|DY387243	366	90.7	344	28	4	855	1196	22	363	1e-127	455
115_Transcript_1/4_Confidence_0.714_Length_1766_45	1766	gi|87142632|gb|DY387243.1|DY387243	366	100	44	0	0	811	854	21	64	2e-15	82.4
115_Transcript_1/4_Confidence_0.714_Length_1766_45	1766	gi|87138903|gb|DY383514.1|DY383514	814	79.35	673	86	43	906	1544	802	149	3e-118	424
115_Transcript_1/4_Confidence_0.714_Length_1766_45	1766	gi|87143971|gb|DY388582.1|DY388582	310	90.24	328	7	10	1370	1697	1	303	1e-112	405
115_Transcript_1/4_Confidence_0.714_Length_1766_45	1766	gi|87143970|gb|DY388581.1|DY388581	317	89.39	330	8	11	1363	1691	317	14	3e-108	390
115_Transcript_1/4_Confidence_0.714_Length_1766_45	1766	gi|87141021|gb|DY385632.1|DY385632	727	81.14	334	47	16	855	1180	585	260	5e-67	254
115_Transcript_1/4_Confidence_0.714_Length_1766_45	1766	gi|87138295|gb|DY382906.1|DY382906	864	80.54	334	49	16	855	1180	527	202	1e-63	243
11601_Transcript_4/6_Confidence_0.400_Length_985_45	985	gi|87150344|gb|DY394955.1|DY394955	673	100	41	0	0	945	985	196	156	6e-14	76.8
11601_Transcript_5/6_Confidence_0.267_Length_845_45	845	gi|87150344|gb|DY394955.1|DY394955	673	100	41	0	0	805	845	196	156	5e-14	76.8
11672_Transcript_2/3_Confidence_0.400_Length_826_45	826	gi|87148456|gb|DY393067.1|DY393067	683	96.15	571	16	5	238	807	677	112	0	928
11672_Transcript_2/3_Confidence_0.400_Length_826_45	826	gi|87148457|gb|DY393068.1|DY393068	654	95.07	548	22	4	260	807	1	543	0	857
11672_Transcript_2/3_Confidence_0.400_Length_826_45	826	gi|87139787|gb|DY384398.1|DY384398	821	91.58	95	6	2	431	524	267	360	4e-30	130
11737_Transcript_3/4_Confidence_0.222_Length_1283_45	1283	gi|87148504|gb|DY393115.1|DY393115	853	98.65	370	5	0	853	1222	389	20	0	656
11737_Transcript_3/4_Confidence_0.222_Length_1283_45	1283	gi|87148505|gb|DY393116.1|DY393116	832	98.31	59	0	1	853	910	774	832	1e-21	102
11756_Transcript_1/1_Confidence_1.000_Length_260_45	260	gi|87145663|gb|DY390274.1|DY390274	745	100	33	0	0	1	33	126	94	4e-10	62.1
11756_Transcript_1/1_Confidence_1.000_Length_260_45	260	gi|87145664|gb|DY390275.1|DY390275	677	100	33	0	0	1	33	578	610	4e-10	62.1
11781_Transcript_1/4_Confidence_0.727_Length_1596_45	1596	gi|87146098|gb|DY390709.1|DY390709	787	98.86	787	2	3	804	1583	787	1	0	1397
11801_Transcript_1/1_Confidence_1.000_Length_510_45	510	gi|87149178|gb|DY393789.1|DY393789	860	98.46	65	1	0	438	502	65	1	6e-26	115
1192_Transcript_2/3_Confidence_0.667_Length_689_45	689	gi|87150404|gb|DY395015.1|DY395015	748	87.98	341	39	2	10	349	340	1	6e-112	401
11932_Transcript_1/4_Confidence_0.667_Length_1554_45	1554	gi|87140224|gb|DY384835.1|DY384835	798	96.04	656	24	2	899	1553	779	125	0	1066
11932_Transcript_1/4_Confidence_0.667_Length_1554_45	1554	gi|87140223|gb|DY384834.1|DY384834	669	95.65	644	26	2	899	1541	27	669	0	1033
11943_Transcript_2/3_Confidence_0.667_Length_2342_45	2342	gi|87138659|gb|DY383270.1|DY383270	902	95.89	901	34	3	182	1080	3	902	0	1456
11943_Transcript_2/3_Confidence_0.667_Length_2342_45	2342	gi|87147916|gb|DY392527.1|DY392527	827	98.25	800	9	5	1461	2256	821	23	0	1395
11943_Transcript_2/3_Confidence_0.667_Length_2342_45	2342	gi|87138417|gb|DY383028.1|DY383028	834	92.94	524	32	5	1208	1729	575	55	0	758
11943_Transcript_2/3_Confidence_0.667_Length_2342_45	2342	gi|87147917|gb|DY392528.1|DY392528	748	100	396	0	0	1074	1469	353	748	0	732
11999_Transcript_1/3_Confidence_0.600_Length_848_45	848	gi|87148431|gb|DY393042.1|DY393042	800	85.39	623	73	16	7	619	8	622	0	630
11999_Transcript_1/3_Confidence_0.600_Length_848_45	848	gi|87148430|gb|DY393041.1|DY393041	561	85.96	406	42	14	224	619	561	161	2e-117	420
11999_Transcript_1/3_Confidence_0.600_Length_848_45	848	gi|87139838|gb|DY384449.1|DY384449	750	91.16	147	11	2	514	659	747	602	1e-50	198
12001_Transcript_2/4_Confidence_0.600_Length_1269_45	1269	gi|87149876|gb|DY394487.1|DY394487	776	99.61	776	3	0	37	812	1	776	0	1417
12001_Transcript_2/4_Confidence_0.600_Length_1269_45	1269	gi|87149875|gb|DY394486.1|DY394486	839	99.81	528	1	0	436	963	839	312	0	970
12001_Transcript_2/4_Confidence_0.600_Length_1269_45	1269	gi|87149875|gb|DY394486.1|DY394486	839	93.91	279	13	3	991	1269	316	42	1e-116	418
12038_Transcript_1/1_Confidence_1.000_Length_391_45	391	gi|87149531|gb|DY394142.1|DY394142	605	99.74	391	1	0	1	391	589	199	0	717
12038_Transcript_1/1_Confidence_1.000_Length_391_45	391	gi|87149532|gb|DY394143.1|DY394143	618	98.72	391	4	1	1	391	2	391	0	693
12038_Transcript_1/1_Confidence_1.000_Length_391_45	391	gi|87144890|gb|DY389501.1|DY389501	229	100	220	0	0	12	231	9	228	7e-114	407
12038_Transcript_1/1_Confidence_1.000_Length_391_45	391	gi|87144891|gb|DY389502.1|DY389502	227	97.3	222	4	2	8	229	222	3	2e-104	375
12048_Transcript_7/12_Confidence_0.244_Length_1392_45	1392	gi|87145371|gb|DY389982.1|DY389982	639	93.67	316	11	8	1074	1384	320	9	2e-130	464
12048_Transcript_7/12_Confidence_0.244_Length_1392_45	1392	gi|87145372|gb|DY389983.1|DY389983	586	88.3	171	11	8	1074	1239	420	586	6e-50	196
12048_Transcript_7/12_Confidence_0.244_Length_1392_45	1392	gi|87146646|gb|DY391257.1|DY391257	755	73.61	341	43	38	689	1000	683	361	4e-17	87.9
12048_Transcript_7/12_Confidence_0.244_Length_1392_45	1392	gi|87146647|gb|DY391258.1|DY391258	509	73.61	341	43	38	689	1000	116	438	4e-17	87.9
1208_Transcript_1/2_Confidence_1.000_Length_813_45	813	gi|87149623|gb|DY394234.1|DY394234	848	91.77	158	11	2	657	813	178	334	8e-57	219
1208_Transcript_1/2_Confidence_1.000_Length_813_45	813	gi|87146798|gb|DY391409.1|DY391409	855	82.8	157	23	4	659	813	189	343	2e-32	137
12096_Transcript_2/2_Confidence_1.000_Length_1016_45	1016	gi|87148741|gb|DY393352.1|DY393352	758	98.95	665	7	0	294	958	88	752	0	1190
12096_Transcript_2/2_Confidence_1.000_Length_1016_45	1016	gi|87148742|gb|DY393353.1|DY393353	740	97.74	664	13	2	294	956	663	1	0	1142
12096_Transcript_2/2_Confidence_1.000_Length_1016_45	1016	gi|87149914|gb|DY394525.1|DY394525	764	86.45	546	62	8	297	840	688	153	6e-168	588
12096_Transcript_2/2_Confidence_1.000_Length_1016_45	1016	gi|87149915|gb|DY394526.1|DY394526	726	86.45	546	62	8	297	840	77	612	6e-168	588
12096_Transcript_2/2_Confidence_1.000_Length_1016_45	1016	gi|87141980|gb|DY386591.1|DY386591	674	85.53	553	70	6	290	841	45	588	2e-162	569
12096_Transcript_2/2_Confidence_1.000_Length_1016_45	1016	gi|87149205|gb|DY393816.1|DY393816	732	85.69	552	66	9	297	846	93	633	2e-162	569
12096_Transcript_2/2_Confidence_1.000_Length_1016_45	1016	gi|87149206|gb|DY393817.1|DY393817	764	85.69	552	66	9	297	846	640	100	2e-162	569
12096_Transcript_2/2_Confidence_1.000_Length_1016_45	1016	gi|87141981|gb|DY386592.1|DY386592	546	86.55	498	64	2	290	787	496	2	4e-155	545
12108_Transcript_1/1_Confidence_1.000_Length_767_45	767	gi|87145168|gb|DY389779.1|DY389779	836	98.57	768	9	2	1	767	18	784	0	1356
12108_Transcript_1/1_Confidence_1.000_Length_767_45	767	gi|87145167|gb|DY389778.1|DY389778	848	98.64	733	8	2	36	767	848	117	0	1297
1211_Transcript_1/3_Confidence_0.500_Length_1919_45	1919	gi|87149922|gb|DY394533.1|DY394533	860	98.93	841	7	2	889	1728	21	860	0	1502
1211_Transcript_1/3_Confidence_0.500_Length_1919_45	1919	gi|87148419|gb|DY393030.1|DY393030	832	98.92	831	8	1	1052	1881	832	2	0	1483
1211_Transcript_1/3_Confidence_0.500_Length_1919_45	1919	gi|87149923|gb|DY394534.1|DY394534	796	98.99	796	8	0	1093	1888	796	1	0	1426
1211_Transcript_1/3_Confidence_0.500_Length_1919_45	1919	gi|87148418|gb|DY393029.1|DY393029	757	99.45	725	4	0	42	766	33	757	0	1317
12143_Transcript_1/2_Confidence_1.000_Length_2320_45	2320	gi|87138644|gb|DY383255.1|DY383255	848	93.9	852	29	9	1346	2187	848	10	0	1264
12143_Transcript_1/2_Confidence_1.000_Length_2320_45	2320	gi|87138645|gb|DY383256.1|DY383256	788	94.65	785	36	5	253	1034	7	788	0	1212
12173_Transcript_1/1_Confidence_1.000_Length_300_45	300	gi|87141123|gb|DY385734.1|DY385734	672	93.98	133	8	0	168	300	477	345	3e-52	202
12173_Transcript_1/1_Confidence_1.000_Length_300_45	300	gi|87141124|gb|DY385735.1|DY385735	677	93.98	133	8	0	168	300	195	327	3e-52	202
12176_Transcript_1/1_Confidence_1.000_Length_382_45	382	gi|87148231|gb|DY392842.1|DY392842	863	77.83	212	28	16	185	382	2	208	2e-25	113
12176_Transcript_1/1_Confidence_1.000_Length_382_45	382	gi|87148230|gb|DY392841.1|DY392841	787	98.36	61	1	0	322	382	738	678	8e-24	108
12186_Transcript_1/1_Confidence_1.000_Length_361_45	361	gi|87141130|gb|DY385741.1|DY385741	571	90.57	53	5	0	38	90	317	265	1e-12	71.3
1222_Transcript_2/4_Confidence_0.700_Length_2085_45	2085	gi|87142788|gb|DY387399.1|DY387399	406	84.01	369	55	4	924	1290	32	398	2e-96	351
1222_Transcript_2/4_Confidence_0.700_Length_2085_45	2085	gi|87142720|gb|DY387331.1|DY387331	420	83.38	379	59	4	910	1286	383	7	2e-95	348
12326_Transcript_1/1_Confidence_1.000_Length_793_45	793	gi|87147613|gb|DY392224.1|DY392224	822	98.5	800	4	5	1	793	17	815	0	1404
12326_Transcript_1/1_Confidence_1.000_Length_793_45	793	gi|87147738|gb|DY392349.1|DY392349	804	97.34	790	14	3	1	784	16	804	0	1336
12326_Transcript_1/1_Confidence_1.000_Length_793_45	793	gi|87143836|gb|DY388447.1|DY388447	688	98.24	683	5	5	1	677	682	1	0	1188
12326_Transcript_1/1_Confidence_1.000_Length_793_45	793	gi|87148424|gb|DY393035.1|DY393035	718	95.7	698	15	11	1	686	24	718	0	1109
12326_Transcript_1/1_Confidence_1.000_Length_793_45	793	gi|87148425|gb|DY393036.1|DY393036	665	96.81	659	17	2	138	793	665	8	0	1098
12326_Transcript_1/1_Confidence_1.000_Length_793_45	793	gi|87143835|gb|DY388446.1|DY388446	717	97.58	621	8	3	1	615	98	717	0	1057
12326_Transcript_1/1_Confidence_1.000_Length_793_45	793	gi|87147614|gb|DY392225.1|DY392225	637	94.52	620	30	3	168	784	637	19	0	953
12326_Transcript_1/1_Confidence_1.000_Length_793_45	793	gi|87147739|gb|DY392350.1|DY392350	618	93.93	610	33	3	184	790	618	10	0	918
12365_Transcript_1/1_Confidence_1.000_Length_596_45	596	gi|87146251|gb|DY390862.1|DY390862	660	99.66	290	1	0	307	596	20	309	6e-151	531
123_Transcript_3/8_Confidence_0.619_Length_1600_45	1600	gi|87144560|gb|DY389171.1|DY389171	840	89.49	685	31	14	535	1200	177	839	0	828
123_Transcript_3/8_Confidence_0.619_Length_1600_45	1600	gi|87144560|gb|DY389171.1|DY389171	840	97.37	76	2	0	1	76	105	180	7e-30	130
123_Transcript_3/8_Confidence_0.619_Length_1600_45	1600	gi|87144559|gb|DY389170.1|DY389170	809	85.64	411	20	12	808	1200	809	420	7e-110	396
123_Transcript_3/8_Confidence_0.619_Length_1600_45	1600	gi|87144559|gb|DY389170.1|DY389170	809	91.4	186	12	4	997	1180	365	182	1e-66	252
123_Transcript_3/8_Confidence_0.619_Length_1600_45	1600	gi|87150244|gb|DY394855.1|DY394855	796	91.4	186	12	4	997	1180	31	214	1e-66	252
12456_Transcript_2/2_Confidence_1.000_Length_497_45	497	gi|87142464|gb|DY387075.1|DY387075	482	87.22	454	31	18	24	455	4	452	2e-139	492
12456_Transcript_2/2_Confidence_1.000_Length_497_45	497	gi|87142465|gb|DY387076.1|DY387076	463	85.65	453	38	18	24	454	448	1	4e-127	451
12456_Transcript_2/2_Confidence_1.000_Length_497_45	497	gi|87143928|gb|DY388539.1|DY388539	575	99.59	246	0	1	252	497	295	539	5e-126	448
12456_Transcript_2/2_Confidence_1.000_Length_497_45	497	gi|87143928|gb|DY388539.1|DY388539	575	97.4	231	4	2	26	255	10	239	3e-109	392
12456_Transcript_2/2_Confidence_1.000_Length_497_45	497	gi|87143929|gb|DY388540.1|DY388540	549	98.37	246	3	1	252	497	256	12	5e-121	431
12456_Transcript_2/2_Confidence_1.000_Length_497_45	497	gi|87143929|gb|DY388540.1|DY388540	549	99.14	232	1	1	24	255	542	312	2e-116	416
1251_Transcript_2/3_Confidence_0.778_Length_2567_45	2567	gi|87141987|gb|DY386598.1|DY386598	827	88.41	820	72	18	681	1493	18	821	0	966
1253_Transcript_8/10_Confidence_0.533_Length_4051_45	4051	gi|87146742|gb|DY391353.1|DY391353	931	98.73	867	8	3	1	865	66	931	0	1537
12541_Transcript_4/5_Confidence_0.364_Length_1571_45	1571	gi|87142057|gb|DY386668.1|DY386668	802	92.77	816	39	10	362	1175	5	802	0	1162
12541_Transcript_4/5_Confidence_0.364_Length_1571_45	1571	gi|87142058|gb|DY386669.1|DY386669	753	94.64	727	35	2	522	1248	737	15	0	1123
1268_Transcript_5/5_Confidence_0.300_Length_1001_45	1001	gi|87149501|gb|DY394112.1|DY394112	864	99.07	863	5	3	48	910	1	860	0	1546
1268_Transcript_5/5_Confidence_0.300_Length_1001_45	1001	gi|87149500|gb|DY394111.1|DY394111	800	99.87	797	0	1	114	910	800	5	0	1465
12717_Transcript_1/1_Confidence_1.000_Length_515_45	515	gi|87146816|gb|DY391427.1|DY391427	704	98.64	513	7	0	1	513	636	124	0	909
12717_Transcript_1/1_Confidence_1.000_Length_515_45	515	gi|87146817|gb|DY391428.1|DY391428	864	98.64	513	7	0	1	513	300	812	0	909
12717_Transcript_1/1_Confidence_1.000_Length_515_45	515	gi|87147139|gb|DY391750.1|DY391750	849	98.25	513	9	0	1	513	648	136	0	898
12717_Transcript_1/1_Confidence_1.000_Length_515_45	515	gi|87147223|gb|DY391834.1|DY391834	844	98.25	513	9	0	1	513	244	756	0	898
12717_Transcript_1/1_Confidence_1.000_Length_515_45	515	gi|87147224|gb|DY391835.1|DY391835	761	98.25	513	9	0	1	513	648	136	0	898
12717_Transcript_1/1_Confidence_1.000_Length_515_45	515	gi|87147138|gb|DY391749.1|DY391749	734	98.36	489	8	0	1	489	244	732	0	859
12717_Transcript_1/1_Confidence_1.000_Length_515_45	515	gi|87139618|gb|DY384229.1|DY384229	611	90.91	429	30	9	1	421	428	1	4e-162	568
12717_Transcript_1/1_Confidence_1.000_Length_515_45	515	gi|87139617|gb|DY384228.1|DY384228	719	90.91	352	27	5	10	358	368	717	4e-132	468
12774_Transcript_3/3_Confidence_0.600_Length_1370_45	1370	gi|87138728|gb|DY383339.1|DY383339	622	96.39	388	13	1	108	494	235	622	0	638
12789_Transcript_2/2_Confidence_1.000_Length_455_45	455	gi|87143975|gb|DY388586.1|DY388586	781	98.86	88	1	0	1	88	505	418	9e-39	158
12789_Transcript_2/2_Confidence_1.000_Length_455_45	455	gi|87142756|gb|DY387367.1|DY387367	423	95.56	90	3	1	1	89	390	301	3e-34	143
12789_Transcript_2/2_Confidence_1.000_Length_455_45	455	gi|87143974|gb|DY388585.1|DY388585	800	97.56	41	1	0	1	41	760	800	1e-12	71.3
1278_Transcript_13/14_Confidence_0.308_Length_2652_45	2652	gi|87143513|gb|DY388124.1|DY388124	822	84.94	737	91	15	1069	1793	729	1	0	728
1278_Transcript_9/14_Confidence_0.231_Length_2460_45	2460	gi|87143513|gb|DY388124.1|DY388124	822	88.11	740	78	8	1054	1789	734	1	0	870
1278_Transcript_9/14_Confidence_0.231_Length_2460_45	2460	gi|87140255|gb|DY384866.1|DY384866	763	94.61	464	25	0	391	854	506	43	0	719
1278_Transcript_9/14_Confidence_0.231_Length_2460_45	2460	gi|87140255|gb|DY384866.1|DY384866	763	89.23	195	14	4	197	391	762	575	6e-62	237
1278_Transcript_9/14_Confidence_0.231_Length_2460_45	2460	gi|87139279|gb|DY383890.1|DY383890	691	81.57	700	90	37	1732	2412	689	10	1e-153	542
1278_Transcript_9/14_Confidence_0.231_Length_2460_45	2460	gi|87140256|gb|DY384867.1|DY384867	684	86.31	336	30	13	61	391	5	329	2e-96	351
1284_Transcript_1/5_Confidence_0.765_Length_1032_45	1032	gi|87145412|gb|DY390023.1|DY390023	810	94.35	531	24	6	505	1032	790	263	0	809
12872_Transcript_1/1_Confidence_1.000_Length_344_45	344	gi|87142024|gb|DY386635.1|DY386635	567	99.68	317	1	0	1	317	243	559	3e-166	580
12872_Transcript_1/1_Confidence_1.000_Length_344_45	344	gi|87142023|gb|DY386634.1|DY386634	574	99.37	316	2	0	1	316	319	4	6e-164	573
12872_Transcript_1/1_Confidence_1.000_Length_344_45	344	gi|87145767|gb|DY390378.1|DY390378	486	93.37	196	7	2	134	323	196	1	3e-77	285
12872_Transcript_1/1_Confidence_1.000_Length_344_45	344	gi|87145768|gb|DY390379.1|DY390379	476	93.37	196	7	2	134	323	281	476	3e-77	285
12872_Transcript_1/1_Confidence_1.000_Length_344_45	344	gi|87147542|gb|DY392153.1|DY392153	523	92.59	189	8	3	134	316	197	9	1e-71	267
12872_Transcript_1/1_Confidence_1.000_Length_344_45	344	gi|87147543|gb|DY392154.1|DY392154	522	92.06	189	7	4	134	315	327	514	2e-69	259
12872_Transcript_1/1_Confidence_1.000_Length_344_45	344	gi|87141655|gb|DY386266.1|DY386266	542	83.33	180	16	8	134	308	340	510	9e-38	154
12872_Transcript_1/1_Confidence_1.000_Length_344_45	344	gi|87141654|gb|DY386265.1|DY386265	393	85.03	147	15	6	134	278	171	30	2e-34	143
12887_Transcript_2/3_Confidence_0.400_Length_1695_45	1695	gi|87139522|gb|DY384133.1|DY384133	896	89.66	522	42	12	988	1504	896	382	0	654
1288_Transcript_5/10_Confidence_0.097_Length_664_45	664	gi|87142471|gb|DY387082.1|DY387082	664	88.19	364	41	2	296	658	634	272	2e-121	433
1288_Transcript_5/10_Confidence_0.097_Length_664_45	664	gi|87142472|gb|DY387083.1|DY387083	653	87.16	366	43	4	296	658	18	382	3e-115	412
12908_Transcript_1/1_Confidence_1.000_Length_1082_45	1082	gi|87142979|gb|DY387590.1|DY387590	768	78.94	470	66	27	411	869	768	321	8e-78	289
12908_Transcript_1/1_Confidence_1.000_Length_1082_45	1082	gi|87142955|gb|DY387566.1|DY387566	756	77.23	448	74	25	430	869	750	323	3e-62	237
1290_Transcript_5/10_Confidence_0.618_Length_2713_45	2713	gi|87148397|gb|DY393008.1|DY393008	826	98.52	542	6	2	868	1408	826	286	0	955
1290_Transcript_5/10_Confidence_0.618_Length_2713_45	2713	gi|87148397|gb|DY393008.1|DY393008	826	93.52	247	6	5	1388	1631	240	1	1e-98	359
13003_Transcript_1/1_Confidence_1.000_Length_518_45	518	gi|87148253|gb|DY392864.1|DY392864	801	82.37	448	52	24	1	440	690	262	6e-101	364
13003_Transcript_1/1_Confidence_1.000_Length_518_45	518	gi|87148252|gb|DY392863.1|DY392863	870	82.14	448	53	24	1	440	414	842	3e-99	359
1302_Transcript_2/5_Confidence_0.500_Length_544_45	544	gi|87144245|gb|DY388856.1|DY388856	796	94.38	409	19	4	1	407	579	173	3e-179	625
1302_Transcript_2/5_Confidence_0.500_Length_544_45	544	gi|87144245|gb|DY388856.1|DY388856	796	97.73	44	1	0	501	544	173	130	3e-14	76.8
1302_Transcript_2/5_Confidence_0.500_Length_544_45	544	gi|87144246|gb|DY388857.1|DY388857	677	94.92	118	4	2	1	117	561	677	2e-46	183
13043_Transcript_1/1_Confidence_1.000_Length_481_45	481	gi|87148902|gb|DY393513.1|DY393513	811	98.67	150	1	1	332	481	1	149	6e-71	265
13043_Transcript_1/1_Confidence_1.000_Length_481_45	481	gi|87148901|gb|DY393512.1|DY393512	829	95.45	66	3	0	416	481	829	764	4e-23	106
13050_Transcript_1/2_Confidence_1.000_Length_526_45	526	gi|87141402|gb|DY386013.1|DY386013	500	87.78	311	32	6	203	510	330	23	3e-99	359
13050_Transcript_1/2_Confidence_1.000_Length_526_45	526	gi|87141403|gb|DY386014.1|DY386014	499	87.78	311	32	6	203	510	171	478	3e-99	359
13050_Transcript_1/2_Confidence_1.000_Length_526_45	526	gi|87144048|gb|DY388659.1|DY388659	685	86.85	327	35	8	204	526	196	518	3e-99	359
13050_Transcript_1/2_Confidence_1.000_Length_526_45	526	gi|87144049|gb|DY388660.1|DY388660	678	86.85	327	35	8	204	526	475	153	3e-99	359
13050_Transcript_1/2_Confidence_1.000_Length_526_45	526	gi|87143813|gb|DY388424.1|DY388424	511	84.78	184	21	7	291	471	318	497	8e-45	178
13050_Transcript_1/2_Confidence_1.000_Length_526_45	526	gi|87139345|gb|DY383956.1|DY383956	643	81.36	220	33	8	292	507	269	484	4e-43	172
13050_Transcript_1/2_Confidence_1.000_Length_526_45	526	gi|87143812|gb|DY388423.1|DY388423	526	83.7	184	23	7	291	471	194	15	2e-41	167
1307_Transcript_2/2_Confidence_1.000_Length_4571_45	4571	gi|87142570|gb|DY387181.1|DY387181	776	86.52	356	31	16	4070	4418	268	613	2e-103	375
1307_Transcript_2/2_Confidence_1.000_Length_4571_45	4571	gi|87142570|gb|DY387181.1|DY387181	776	87.25	251	22	7	3848	4090	1	249	7e-74	278
13109_Transcript_1/1_Confidence_1.000_Length_329_45	329	gi|87146646|gb|DY391257.1|DY391257	755	95.58	226	10	0	4	229	410	635	1e-100	363
13109_Transcript_1/1_Confidence_1.000_Length_329_45	329	gi|87146647|gb|DY391258.1|DY391258	509	95.58	226	10	0	4	229	389	164	1e-100	363
13112_Transcript_1/1_Confidence_1.000_Length_212_45	212	gi|87145206|gb|DY389817.1|DY389817	681	96.21	211	8	0	2	212	351	141	8e-96	346
13115_Transcript_2/4_Confidence_0.571_Length_668_45	668	gi|300432946|gb|HM124534.1|	361	91.49	235	2	6	1	233	143	361	1e-83	307
13116_Transcript_2/5_Confidence_0.600_Length_459_45	459	gi|300432946|gb|HM124534.1|	361	96.43	112	2	2	349	459	76	186	2e-46	183
13138_Transcript_1/1_Confidence_1.000_Length_396_45	396	gi|87146342|gb|DY390953.1|DY390953	526	99.75	396	1	0	1	396	101	496	0	726
13138_Transcript_1/1_Confidence_1.000_Length_396_45	396	gi|87146343|gb|DY390954.1|DY390954	524	99.49	395	0	2	1	394	425	32	0	717
13172_Transcript_1/1_Confidence_1.000_Length_296_45	296	gi|87147447|gb|DY392058.1|DY392058	804	100	296	0	0	1	296	464	759	3e-156	547
13172_Transcript_1/1_Confidence_1.000_Length_296_45	296	gi|87147448|gb|DY392059.1|DY392059	755	100	296	0	0	1	296	623	328	3e-156	547
13172_Transcript_1/1_Confidence_1.000_Length_296_45	296	gi|87149254|gb|DY393865.1|DY393865	813	86.81	288	33	4	13	296	597	311	9e-87	316
13172_Transcript_1/1_Confidence_1.000_Length_296_45	296	gi|87149255|gb|DY393866.1|DY393866	822	86.81	288	33	4	13	296	519	805	9e-87	316
13190_Transcript_1/2_Confidence_1.000_Length_588_45	588	gi|87141037|gb|DY385648.1|DY385648	906	93.23	591	29	9	1	588	250	832	0	859
13190_Transcript_1/2_Confidence_1.000_Length_588_45	588	gi|87141035|gb|DY385646.1|DY385646	678	93.22	590	29	9	2	588	678	97	0	857
13217_Transcript_1/3_Confidence_0.600_Length_1362_45	1362	gi|87139857|gb|DY384468.1|DY384468	746	93.65	693	33	10	554	1242	1	686	0	1026
13217_Transcript_1/3_Confidence_0.600_Length_1362_45	1362	gi|87139856|gb|DY384467.1|DY384467	634	93.97	580	26	8	666	1242	634	61	0	869
13228_Transcript_3/9_Confidence_0.619_Length_1461_45	1461	gi|87142042|gb|DY386653.1|DY386653	603	91.46	609	42	7	632	1236	603	1	0	828
13228_Transcript_3/9_Confidence_0.619_Length_1461_45	1461	gi|87142007|gb|DY386618.1|DY386618	552	90.56	180	15	2	672	850	552	374	4e-62	237
13228_Transcript_3/9_Confidence_0.619_Length_1461_45	1461	gi|87145323|gb|DY389934.1|DY389934	781	98.46	130	0	2	500	627	598	727	2e-59	228
13228_Transcript_3/9_Confidence_0.619_Length_1461_45	1461	gi|87145323|gb|DY389934.1|DY389934	781	99.21	126	0	1	379	503	271	396	8e-59	226
1324_Transcript_1/1_Confidence_1.000_Length_2196_45	2196	gi|87145875|gb|DY390486.1|DY390486	636	98.11	636	11	1	227	861	636	1	0	1107
1324_Transcript_1/1_Confidence_1.000_Length_2196_45	2196	gi|87145876|gb|DY390487.1|DY390487	502	93.84	422	26	0	1	422	81	502	0	636
13322_Transcript_1/1_Confidence_1.000_Length_249_45	249	gi|87142444|gb|DY387055.1|DY387055	833	97.59	249	6	0	1	249	51	299	3e-120	427
13323_Transcript_1/1_Confidence_1.000_Length_1063_45	1063	gi|87142444|gb|DY387055.1|DY387055	833	93.83	567	20	8	506	1063	823	263	0	839
13323_Transcript_1/1_Confidence_1.000_Length_1063_45	1063	gi|87142445|gb|DY387056.1|DY387056	790	97.51	281	7	0	1	281	510	790	1e-135	481
1336_Transcript_2/3_Confidence_0.571_Length_577_45	577	gi|87138179|gb|DY382790.1|DY382790	615	98.32	357	6	0	221	577	15	371	7e-180	627
1336_Transcript_2/3_Confidence_0.571_Length_577_45	577	gi|87138184|gb|DY382795.1|DY382795	619	98.32	357	6	0	221	577	605	249	7e-180	627
1336_Transcript_2/3_Confidence_0.571_Length_577_45	577	gi|87142374|gb|DY386985.1|DY386985	609	98.32	357	6	0	221	577	9	365	7e-180	627
1336_Transcript_2/3_Confidence_0.571_Length_577_45	577	gi|87142375|gb|DY386986.1|DY386986	613	98.32	357	6	0	221	577	599	243	7e-180	627
1336_Transcript_2/3_Confidence_0.571_Length_577_45	577	gi|87143382|gb|DY387993.1|DY387993	686	93.16	307	17	2	272	577	144	447	6e-126	448
1336_Transcript_2/3_Confidence_0.571_Length_577_45	577	gi|87146330|gb|DY390941.1|DY390941	836	94.07	253	11	3	326	577	836	587	6e-106	381
1336_Transcript_2/3_Confidence_0.571_Length_577_45	577	gi|87143384|gb|DY387995.1|DY387995	575	88.31	308	30	4	272	577	84	387	6e-101	364
1336_Transcript_2/3_Confidence_0.571_Length_577_45	577	gi|87139709|gb|DY384320.1|DY384320	647	86.64	307	37	2	272	577	77	380	1e-92	337
1336_Transcript_2/3_Confidence_0.571_Length_577_45	577	gi|87139708|gb|DY384319.1|DY384319	786	92.57	202	9	5	379	577	785	587	5e-77	285
1336_Transcript_2/3_Confidence_0.571_Length_577_45	577	gi|87143383|gb|DY387994.1|DY387994	759	94.48	181	7	2	397	577	756	579	3e-74	276
1336_Transcript_2/3_Confidence_0.571_Length_577_45	577	gi|87143381|gb|DY387992.1|DY387992	711	96.97	132	3	1	447	577	710	579	1e-57	220
1336_Transcript_2/3_Confidence_0.571_Length_577_45	577	gi|87146331|gb|DY390942.1|DY390942	753	93.81	97	6	0	272	368	657	753	3e-35	147
1337_Transcript_1/1_Confidence_1.000_Length_2584_45	2584	gi|87143648|gb|DY388259.1|DY388259	919	94.97	835	33	8	1532	2360	919	88	0	1301
1337_Transcript_1/1_Confidence_1.000_Length_2584_45	2584	gi|87148324|gb|DY392935.1|DY392935	568	96.12	567	8	9	1810	2372	12	568	0	913
1337_Transcript_1/1_Confidence_1.000_Length_2584_45	2584	gi|87148325|gb|DY392936.1|DY392936	568	95.08	569	16	9	1807	2372	560	1	0	885
1337_Transcript_1/1_Confidence_1.000_Length_2584_45	2584	gi|87138261|gb|DY382872.1|DY382872	855	84.24	736	94	19	281	1005	124	848	0	697
1338_Transcript_3/7_Confidence_0.741_Length_6567_45	6567	gi|87141339|gb|DY385950.1|DY385950	869	98.5	869	13	0	5071	5939	1	869	0	1533
1338_Transcript_3/7_Confidence_0.741_Length_6567_45	6567	gi|87138707|gb|DY383318.1|DY383318	859	97.44	860	15	4	5251	6104	1	859	0	1459
1338_Transcript_3/7_Confidence_0.741_Length_6567_45	6567	gi|87141338|gb|DY385949.1|DY385949	575	90.77	520	23	12	5990	6505	575	77	0	671
1338_Transcript_3/7_Confidence_0.741_Length_6567_45	6567	gi|87148223|gb|DY392834.1|DY392834	809	88.36	189	20	2	3892	4079	569	382	4e-58	226
1338_Transcript_3/7_Confidence_0.741_Length_6567_45	6567	gi|87148223|gb|DY392834.1|DY392834	809	94.49	127	7	0	4183	4309	380	254	3e-49	196
1338_Transcript_3/7_Confidence_0.741_Length_6567_45	6567	gi|87148222|gb|DY392833.1|DY392833	839	89.29	84	8	1	3892	3975	757	839	2e-21	104
13476_Transcript_3/4_Confidence_0.556_Length_1057_45	1057	gi|87144889|gb|DY389500.1|DY389500	906	94.56	882	46	2	11	891	1	881	0	1362
13476_Transcript_3/4_Confidence_0.556_Length_1057_45	1057	gi|87144888|gb|DY389499.1|DY389499	880	93.63	659	40	2	234	891	880	223	0	983
13510_Transcript_1/1_Confidence_1.000_Length_969_45	969	gi|87143980|gb|DY388591.1|DY388591	858	99.65	858	3	0	68	925	858	1	0	1568
13510_Transcript_1/1_Confidence_1.000_Length_969_45	969	gi|87143981|gb|DY388592.1|DY388592	694	98.45	645	8	2	1	643	47	691	0	1134
13510_Transcript_1/1_Confidence_1.000_Length_969_45	969	gi|87142870|gb|DY387481.1|DY387481	779	88.4	405	40	6	201	600	699	297	1e-135	481
13510_Transcript_1/1_Confidence_1.000_Length_969_45	969	gi|87142869|gb|DY387480.1|DY387480	488	90.2	204	16	3	201	400	285	488	4e-70	263
13568_Transcript_1/1_Confidence_1.000_Length_283_45	283	gi|87150155|gb|DY394766.1|DY394766	684	93.69	111	7	0	173	283	543	433	9e-42	167
13568_Transcript_1/1_Confidence_1.000_Length_283_45	283	gi|87150155|gb|DY394766.1|DY394766	684	82.84	134	10	7	13	137	678	549	6e-24	108
13568_Transcript_1/1_Confidence_1.000_Length_283_45	283	gi|87150156|gb|DY394767.1|DY394767	659	93.69	111	7	0	173	283	139	249	9e-42	167
13605_Transcript_1/1_Confidence_1.000_Length_234_45	234	gi|87141584|gb|DY386195.1|DY386195	727	97.02	235	5	2	1	234	577	344	3e-110	394
13617_Transcript_1/1_Confidence_1.000_Length_535_45	535	gi|87141954|gb|DY386565.1|DY386565	683	99.81	530	1	0	2	531	531	2	0	974
13617_Transcript_1/1_Confidence_1.000_Length_535_45	535	gi|87141956|gb|DY386567.1|DY386567	702	98.59	213	3	0	2	214	490	702	8e-105	377
13662_Transcript_1/1_Confidence_1.000_Length_218_45	218	gi|87145634|gb|DY390245.1|DY390245	577	99.46	186	1	0	32	217	577	392	1e-93	339
13662_Transcript_1/1_Confidence_1.000_Length_218_45	218	gi|87145633|gb|DY390244.1|DY390244	601	98.92	186	2	0	32	217	1	186	6e-92	333
13678_Transcript_1/2_Confidence_1.000_Length_900_45	900	gi|87139899|gb|DY384510.1|DY384510	713	86.73	678	62	25	149	816	703	44	0	728
13678_Transcript_1/2_Confidence_1.000_Length_900_45	900	gi|87139900|gb|DY384511.1|DY384511	805	87.05	641	57	22	135	767	166	788	0	701
13696_Transcript_2/3_Confidence_0.778_Length_757_45	757	gi|87145101|gb|DY389712.1|DY389712	672	96.27	644	21	2	1	644	658	18	0	1053
13696_Transcript_2/3_Confidence_0.778_Length_757_45	757	gi|87145102|gb|DY389713.1|DY389713	643	96.18	629	22	1	1	629	17	643	0	1027
13763_Transcript_2/3_Confidence_0.667_Length_1222_45	1222	gi|87149786|gb|DY394397.1|DY394397	832	100	498	0	0	725	1222	1	498	0	920
13763_Transcript_2/3_Confidence_0.667_Length_1222_45	1222	gi|87149787|gb|DY394398.1|DY394398	719	99.32	293	0	2	931	1222	719	428	5e-150	529
13769_Transcript_1/1_Confidence_1.000_Length_533_45	533	gi|87144938|gb|DY389549.1|DY389549	646	81.14	350	46	6	1	331	128	476	2e-70	263
13769_Transcript_1/1_Confidence_1.000_Length_533_45	533	gi|87144939|gb|DY389550.1|DY389550	635	81.14	350	46	6	1	331	518	170	2e-70	263
13786_Transcript_1/1_Confidence_1.000_Length_1456_45	1456	gi|87141656|gb|DY386267.1|DY386267	697	93.01	701	30	12	188	875	697	3	0	1005
13786_Transcript_1/1_Confidence_1.000_Length_1456_45	1456	gi|87141657|gb|DY386268.1|DY386268	885	91.85	577	26	14	1	560	312	884	0	785
13786_Transcript_1/1_Confidence_1.000_Length_1456_45	1456	gi|87142137|gb|DY386748.1|DY386748	730	100	30	0	0	396	425	276	305	1e-07	56.5
13802_Transcript_1/1_Confidence_1.000_Length_325_45	325	gi|87142126|gb|DY386737.1|DY386737	822	96.04	303	12	0	1	303	273	575	4e-140	494
13807_Transcript_1/1_Confidence_1.000_Length_462_45	462	gi|87150458|gb|DY395069.1|DY395069	740	99.35	462	3	0	1	462	648	187	0	837
13807_Transcript_1/1_Confidence_1.000_Length_462_45	462	gi|87149303|gb|DY393914.1|DY393914	595	99.36	156	1	0	1	156	440	595	1e-76	283
13807_Transcript_1/1_Confidence_1.000_Length_462_45	462	gi|87149304|gb|DY393915.1|DY393915	587	94.7	151	7	1	1	151	150	1	2e-61	233
138_Transcript_1/4_Confidence_0.375_Length_544_45	544	gi|87146745|gb|DY391356.1|DY391356	578	93.22	59	2	2	479	536	262	205	5e-17	86.1
13940_Transcript_1/2_Confidence_1.000_Length_1362_45	1362	gi|87144893|gb|DY389504.1|DY389504	481	99.79	473	1	0	538	1010	7	479	0	869
13940_Transcript_1/2_Confidence_1.000_Length_1362_45	1362	gi|87144894|gb|DY389505.1|DY389505	467	99.57	467	2	0	543	1009	467	1	0	852
14075_Transcript_1/2_Confidence_1.000_Length_581_45	581	gi|87139975|gb|DY384586.1|DY384586	722	84.13	416	53	12	131	538	448	38	1e-108	390
14101_Transcript_1/1_Confidence_1.000_Length_540_45	540	gi|87150315|gb|DY394926.1|DY394926	661	100	58	0	0	483	540	488	431	1e-23	108
14180_Transcript_1/1_Confidence_1.000_Length_222_45	222	gi|87150315|gb|DY394926.1|DY394926	661	98.97	97	1	0	1	97	361	265	4e-44	174
14180_Transcript_1/1_Confidence_1.000_Length_222_45	222	gi|87145749|gb|DY390360.1|DY390360	527	89	100	6	5	1	98	37	133	2e-27	119
14180_Transcript_1/1_Confidence_1.000_Length_222_45	222	gi|87145750|gb|DY390361.1|DY390361	548	89	100	6	5	1	98	480	384	2e-27	119
14180_Transcript_1/1_Confidence_1.000_Length_222_45	222	gi|87148153|gb|DY392764.1|DY392764	514	87.74	106	7	6	1	104	335	436	2e-27	119
141_Transcript_1/2_Confidence_1.000_Length_5991_45	5991	gi|87138457|gb|DY383068.1|DY383068	763	96.47	737	26	0	401	1137	763	27	0	1218
141_Transcript_1/2_Confidence_1.000_Length_5991_45	5991	gi|87138461|gb|DY383072.1|DY383072	762	95.04	464	19	4	269	730	299	760	0	726
141_Transcript_1/2_Confidence_1.000_Length_5991_45	5991	gi|87138461|gb|DY383072.1|DY383072	762	88.05	318	27	9	8	320	1	312	2e-100	366
1423_Transcript_1/6_Confidence_0.647_Length_1472_45	1472	gi|87150601|gb|DY395212.1|DY395212	691	82.91	316	39	11	941	1251	444	139	4e-72	270
1423_Transcript_1/6_Confidence_0.647_Length_1472_45	1472	gi|87150600|gb|DY395211.1|DY395211	831	82.43	313	38	13	941	1247	530	831	3e-68	257
1423_Transcript_2/6_Confidence_0.706_Length_1459_45	1459	gi|87150600|gb|DY395211.1|DY395211	831	95.56	45	2	0	830	874	530	574	1e-12	73.1
1423_Transcript_2/6_Confidence_0.706_Length_1459_45	1459	gi|87150601|gb|DY395212.1|DY395212	691	95.56	45	2	0	830	874	444	400	1e-12	73.1
14303_Transcript_1/2_Confidence_1.000_Length_719_45	719	gi|87143752|gb|DY388363.1|DY388363	528	89.43	530	36	14	165	680	5	528	0	651
14303_Transcript_1/2_Confidence_1.000_Length_719_45	719	gi|87140925|gb|DY385536.1|DY385536	712	91.13	282	12	10	448	719	1	279	2e-102	370
14303_Transcript_1/2_Confidence_1.000_Length_719_45	719	gi|87141490|gb|DY386101.1|DY386101	762	90.27	226	11	8	504	719	1	225	6e-77	285
14356_Transcript_1/1_Confidence_1.000_Length_770_45	770	gi|87143754|gb|DY388365.1|DY388365	796	97.93	484	8	2	288	770	793	311	0	837
14356_Transcript_1/1_Confidence_1.000_Length_770_45	770	gi|87143755|gb|DY388366.1|DY388366	651	94.51	401	16	6	110	508	255	651	8e-176	614
14369_Transcript_3/4_Confidence_0.583_Length_1196_45	1196	gi|87145867|gb|DY390478.1|DY390478	685	98.31	533	8	1	594	1125	541	9	0	933
14452_Transcript_1/1_Confidence_1.000_Length_316_45	316	gi|87145637|gb|DY390248.1|DY390248	880	100	157	0	0	1	157	157	1	6e-79	291
14489_Transcript_1/1_Confidence_1.000_Length_533_45	533	gi|87142748|gb|DY387359.1|DY387359	546	100	501	0	0	32	532	1	501	0	926
14489_Transcript_1/1_Confidence_1.000_Length_533_45	533	gi|87149958|gb|DY394569.1|DY394569	558	97.57	534	12	1	1	533	540	7	0	913
14489_Transcript_1/1_Confidence_1.000_Length_533_45	533	gi|87149957|gb|DY394568.1|DY394568	510	98.01	502	9	1	32	532	1	502	0	870
1457_Transcript_2/3_Confidence_0.714_Length_1859_45	1859	gi|87144952|gb|DY389563.1|DY389563	785	100	780	0	0	6	785	6	785	0	1441
1457_Transcript_2/3_Confidence_0.714_Length_1859_45	1859	gi|87144503|gb|DY389114.1|DY389114	780	99.62	782	1	2	247	1028	1	780	0	1426
1457_Transcript_2/3_Confidence_0.714_Length_1859_45	1859	gi|87141764|gb|DY386375.1|DY386375	713	99.44	713	4	0	423	1135	1	713	0	1295
1457_Transcript_2/3_Confidence_0.714_Length_1859_45	1859	gi|87144577|gb|DY389188.1|DY389188	685	99.08	655	6	0	599	1253	8	662	0	1177
1457_Transcript_2/3_Confidence_0.714_Length_1859_45	1859	gi|87144578|gb|DY389189.1|DY389189	676	98.78	655	8	0	599	1253	669	15	0	1166
1457_Transcript_2/3_Confidence_0.714_Length_1859_45	1859	gi|87146996|gb|DY391607.1|DY391607	818	99.2	624	4	1	1	623	195	818	0	1123
1457_Transcript_2/3_Confidence_0.714_Length_1859_45	1859	gi|87150517|gb|DY395128.1|DY395128	607	99.67	599	2	0	605	1203	9	607	0	1096
1457_Transcript_2/3_Confidence_0.714_Length_1859_45	1859	gi|87150518|gb|DY395129.1|DY395129	593	99.49	585	2	1	605	1188	585	1	0	1062
1457_Transcript_2/3_Confidence_0.714_Length_1859_45	1859	gi|87144171|gb|DY388782.1|DY388782	646	98.64	590	6	1	664	1253	1	588	0	1046
1457_Transcript_2/3_Confidence_0.714_Length_1859_45	1859	gi|87144171|gb|DY388782.1|DY388782	646	96.88	64	2	0	1334	1397	583	646	4e-23	108
1457_Transcript_2/3_Confidence_0.714_Length_1859_45	1859	gi|87145971|gb|DY390582.1|DY390582	747	99.45	550	3	0	1	550	550	1	0	1000
1457_Transcript_2/3_Confidence_0.714_Length_1859_45	1859	gi|87148776|gb|DY393387.1|DY393387	821	89.23	789	81	4	467	1253	28	814	0	983
1457_Transcript_2/3_Confidence_0.714_Length_1859_45	1859	gi|87145972|gb|DY390583.1|DY390583	729	99.44	537	3	0	1	537	193	729	0	976
1457_Transcript_2/3_Confidence_0.714_Length_1859_45	1859	gi|87147497|gb|DY392108.1|DY392108	778	88.86	772	82	4	441	1210	9	778	0	946
1457_Transcript_2/3_Confidence_0.714_Length_1859_45	1859	gi|87149428|gb|DY394039.1|DY394039	790	88.03	785	82	12	278	1056	11	789	0	918
1457_Transcript_2/3_Confidence_0.714_Length_1859_45	1859	gi|87147262|gb|DY391873.1|DY391873	825	89.18	721	74	4	535	1253	33	751	0	896
1457_Transcript_2/3_Confidence_0.714_Length_1859_45	1859	gi|87145598|gb|DY390209.1|DY390209	715	88.03	710	77	8	13	717	9	715	0	833
1457_Transcript_2/3_Confidence_0.714_Length_1859_45	1859	gi|87144504|gb|DY389115.1|DY389115	858	99.33	448	3	0	806	1253	858	411	0	811
1457_Transcript_2/3_Confidence_0.714_Length_1859_45	1859	gi|87144504|gb|DY389115.1|DY389115	858	98.08	416	8	0	1334	1749	416	1	0	725
1457_Transcript_2/3_Confidence_0.714_Length_1859_45	1859	gi|87141765|gb|DY386376.1|DY386376	849	99.33	446	3	0	808	1253	849	404	0	808
1457_Transcript_2/3_Confidence_0.714_Length_1859_45	1859	gi|87141765|gb|DY386376.1|DY386376	849	97.75	400	7	2	1334	1733	409	12	0	688
1457_Transcript_2/3_Confidence_0.714_Length_1859_45	1859	gi|87144304|gb|DY388915.1|DY388915	773	89.62	636	62	4	620	1253	1	634	0	806
1457_Transcript_2/3_Confidence_0.714_Length_1859_45	1859	gi|87145388|gb|DY389999.1|DY389999	826	99.32	440	3	0	814	1253	826	387	0	797
1457_Transcript_2/3_Confidence_0.714_Length_1859_45	1859	gi|87145388|gb|DY389999.1|DY389999	826	99.23	392	3	0	1334	1725	392	1	0	708
1457_Transcript_2/3_Confidence_0.714_Length_1859_45	1859	gi|87144953|gb|DY389564.1|DY389564	857	99.31	437	3	0	817	1253	857	421	0	791
1457_Transcript_2/3_Confidence_0.714_Length_1859_45	1859	gi|87144953|gb|DY389564.1|DY389564	857	98.82	424	5	0	1334	1757	426	3	0	756
1457_Transcript_2/3_Confidence_0.714_Length_1859_45	1859	gi|87146997|gb|DY391608.1|DY391608	828	99.02	408	2	2	848	1253	828	421	0	730
1457_Transcript_2/3_Confidence_0.714_Length_1859_45	1859	gi|87146997|gb|DY391608.1|DY391608	828	98.48	395	1	4	1334	1725	426	34	0	691
1457_Transcript_2/3_Confidence_0.714_Length_1859_45	1859	gi|87145931|gb|DY390542.1|DY390542	708	99.25	398	3	0	1334	1731	416	19	0	719
1457_Transcript_2/3_Confidence_0.714_Length_1859_45	1859	gi|87145931|gb|DY390542.1|DY390542	708	98.99	298	3	0	956	1253	708	411	2e-151	534
1457_Transcript_2/3_Confidence_0.714_Length_1859_45	1859	gi|87148354|gb|DY392965.1|DY392965	820	87.52	617	73	4	1	615	206	820	0	710
1457_Transcript_2/3_Confidence_0.714_Length_1859_45	1859	gi|87145166|gb|DY389777.1|DY389777	855	88.91	577	60	4	679	1253	855	281	0	708
1457_Transcript_2/3_Confidence_0.714_Length_1859_45	1859	gi|87145165|gb|DY389776.1|DY389776	823	87.4	619	70	8	1	615	209	823	0	704
1457_Transcript_2/3_Confidence_0.714_Length_1859_45	1859	gi|87141346|gb|DY385957.1|DY385957	698	89.08	568	58	4	688	1253	10	575	0	702
1457_Transcript_2/3_Confidence_0.714_Length_1859_45	1859	gi|87145981|gb|DY390592.1|DY390592	785	87.13	614	73	6	1	611	175	785	0	691
1457_Transcript_2/3_Confidence_0.714_Length_1859_45	1859	gi|87143078|gb|DY387689.1|DY387689	735	93.98	432	20	6	1138	1566	589	161	0	649
1457_Transcript_2/3_Confidence_0.714_Length_1859_45	1859	gi|87143078|gb|DY387689.1|DY387689	735	93.59	78	5	0	1069	1146	735	658	7e-26	117
1457_Transcript_2/3_Confidence_0.714_Length_1859_45	1859	gi|87142116|gb|DY386727.1|DY386727	875	89.36	498	49	4	758	1253	13	508	3e-178	623
1457_Transcript_2/3_Confidence_0.714_Length_1859_45	1859	gi|87150275|gb|DY394886.1|DY394886	749	89.09	504	51	4	752	1253	749	248	3e-178	623
1457_Transcript_2/3_Confidence_0.714_Length_1859_45	1859	gi|87149997|gb|DY394608.1|DY394608	758	86.65	562	67	8	1	558	198	755	5e-176	616
1457_Transcript_2/3_Confidence_0.714_Length_1859_45	1859	gi|87145297|gb|DY389908.1|DY389908	352	98.55	345	1	3	1412	1753	347	4	3e-173	606
1457_Transcript_2/3_Confidence_0.714_Length_1859_45	1859	gi|87144172|gb|DY388783.1|DY388783	464	92.86	420	23	6	1334	1749	419	3	4e-172	603
1457_Transcript_2/3_Confidence_0.714_Length_1859_45	1859	gi|87139987|gb|DY384598.1|DY384598	751	89.6	471	45	4	785	1253	34	502	7e-170	595
1457_Transcript_2/3_Confidence_0.714_Length_1859_45	1859	gi|87144992|gb|DY389603.1|DY389603	881	89.36	470	46	4	786	1253	1	468	1e-167	588
1457_Transcript_2/3_Confidence_0.714_Length_1859_45	1859	gi|87145298|gb|DY389909.1|DY389909	340	97.58	331	4	3	1426	1753	1	330	2e-160	564
1457_Transcript_2/3_Confidence_0.714_Length_1859_45	1859	gi|87150352|gb|DY394963.1|DY394963	860	89.06	448	45	4	808	1253	1	446	4e-157	553
1457_Transcript_2/3_Confidence_0.714_Length_1859_45	1859	gi|87148777|gb|DY393388.1|DY393388	864	89.49	428	41	4	828	1253	864	439	1e-152	538
1457_Transcript_2/3_Confidence_0.714_Length_1859_45	1859	gi|87146463|gb|DY391074.1|DY391074	653	87.33	450	51	6	1	447	207	653	3e-144	510
1457_Transcript_2/3_Confidence_0.714_Length_1859_45	1859	gi|87142117|gb|DY386728.1|DY386728	822	89.92	387	35	4	869	1253	822	438	7e-140	496
1457_Transcript_2/3_Confidence_0.714_Length_1859_45	1859	gi|87148355|gb|DY392966.1|DY392966	826	89.95	368	35	2	887	1253	826	460	3e-133	473
1457_Transcript_2/3_Confidence_0.714_Length_1859_45	1859	gi|87139565|gb|DY384176.1|DY384176	712	90.45	356	32	2	899	1253	1	355	2e-131	468
1457_Transcript_2/3_Confidence_0.714_Length_1859_45	1859	gi|87146111|gb|DY390722.1|DY390722	636	90	360	34	2	895	1253	627	269	2e-130	464
1457_Transcript_2/3_Confidence_0.714_Length_1859_45	1859	gi|87146110|gb|DY390721.1|DY390721	657	88.61	360	37	4	896	1253	11	368	2e-121	435
1457_Transcript_2/3_Confidence_0.714_Length_1859_45	1859	gi|87144134|gb|DY388745.1|DY388745	711	83.54	480	59	17	1138	1610	630	164	2e-120	431
1457_Transcript_2/3_Confidence_0.714_Length_1859_45	1859	gi|87145599|gb|DY390210.1|DY390210	763	89.76	332	30	4	924	1253	763	434	1e-117	422
1457_Transcript_2/3_Confidence_0.714_Length_1859_45	1859	gi|87145980|gb|DY390591.1|DY390591	591	89.49	333	33	2	923	1253	591	259	4e-117	420
1457_Transcript_2/3_Confidence_0.714_Length_1859_45	1859	gi|87147263|gb|DY391874.1|DY391874	764	89.69	320	31	2	935	1253	764	446	3e-113	407
1457_Transcript_2/3_Confidence_0.714_Length_1859_45	1859	gi|87144993|gb|DY389604.1|DY389604	760	89.77	303	27	4	953	1253	760	460	2e-106	385
1457_Transcript_2/3_Confidence_0.714_Length_1859_45	1859	gi|87139956|gb|DY384567.1|DY384567	720	96.54	231	8	0	874	1104	231	1	6e-106	383
1457_Transcript_2/3_Confidence_0.714_Length_1859_45	1859	gi|87149954|gb|DY394565.1|DY394565	538	87.16	335	37	6	1	332	193	524	1e-103	375
1457_Transcript_2/3_Confidence_0.714_Length_1859_45	1859	gi|87139699|gb|DY384310.1|DY384310	700	91.76	267	20	2	988	1253	18	283	5e-102	370
1457_Transcript_2/3_Confidence_0.714_Length_1859_45	1859	gi|87139700|gb|DY384311.1|DY384311	708	91.76	267	20	2	988	1253	682	417	5e-102	370
1457_Transcript_2/3_Confidence_0.714_Length_1859_45	1859	gi|87146952|gb|DY391563.1|DY391563	718	91.08	269	24	0	985	1253	718	450	2e-100	364
1457_Transcript_2/3_Confidence_0.714_Length_1859_45	1859	gi|87147498|gb|DY392109.1|DY392109	743	89.58	288	25	5	971	1253	731	444	3e-99	361
1457_Transcript_2/3_Confidence_0.714_Length_1859_45	1859	gi|87138396|gb|DY383007.1|DY383007	779	93.78	225	12	2	1343	1566	10	233	5e-92	337
1457_Transcript_2/3_Confidence_0.714_Length_1859_45	1859	gi|87144305|gb|DY388916.1|DY388916	672	92.02	238	19	0	1016	1253	672	435	2e-91	335
1457_Transcript_2/3_Confidence_0.714_Length_1859_45	1859	gi|87139957|gb|DY384568.1|DY384568	604	94.18	189	11	0	874	1062	189	1	1e-77	289
1457_Transcript_2/3_Confidence_0.714_Length_1859_45	1859	gi|87145932|gb|DY390543.1|DY390543	535	99.26	135	1	0	400	534	401	535	3e-64	244
1457_Transcript_2/3_Confidence_0.714_Length_1859_45	1859	gi|87147746|gb|DY392357.1|DY392357	568	94.52	73	4	0	1181	1253	562	490	9e-25	113
1457_Transcript_2/3_Confidence_0.714_Length_1859_45	1859	gi|87147747|gb|DY392358.1|DY392358	568	93.15	73	4	1	1181	1253	8	79	1e-22	106
1457_Transcript_2/3_Confidence_0.714_Length_1859_45	1859	gi|87145389|gb|DY390000.1|DY390000	702	100	55	0	0	1	55	648	702	2e-21	102
14581_Transcript_1/1_Confidence_1.000_Length_339_45	339	gi|87145879|gb|DY390490.1|DY390490	616	98.22	338	6	0	2	339	200	537	2e-169	592
14623_Transcript_1/1_Confidence_1.000_Length_1063_45	1063	gi|87146771|gb|DY391382.1|DY391382	778	94.87	117	5	1	616	731	117	1	1e-45	182
14646_Transcript_1/1_Confidence_1.000_Length_1065_45	1065	gi|87142070|gb|DY386681.1|DY386681	873	92.59	823	47	10	241	1059	1	813	0	1170
14646_Transcript_1/1_Confidence_1.000_Length_1065_45	1065	gi|87138205|gb|DY382816.1|DY382816	762	86.63	606	68	11	310	911	9	605	0	658
14719_Transcript_1/2_Confidence_1.000_Length_639_45	639	gi|87138232|gb|DY382843.1|DY382843	529	93.92	181	5	4	232	409	325	148	6e-72	268
14719_Transcript_1/2_Confidence_1.000_Length_639_45	639	gi|87138232|gb|DY382843.1|DY382843	529	98.61	144	2	0	445	588	144	1	5e-68	255
14719_Transcript_1/2_Confidence_1.000_Length_639_45	639	gi|87138232|gb|DY382843.1|DY382843	529	93.88	49	1	2	20	66	528	480	5e-13	73.1
14719_Transcript_1/2_Confidence_1.000_Length_639_45	639	gi|87138233|gb|DY382844.1|DY382844	538	93.92	181	5	4	232	409	206	383	6e-72	268
14719_Transcript_1/2_Confidence_1.000_Length_639_45	639	gi|87138233|gb|DY382844.1|DY382844	538	98.64	147	2	0	445	591	387	533	1e-69	261
14726_Transcript_1/1_Confidence_1.000_Length_274_45	274	gi|87145693|gb|DY390304.1|DY390304	797	93.53	201	8	5	78	274	797	598	4e-80	294
14727_Transcript_1/2_Confidence_1.000_Length_1114_45	1114	gi|87147957|gb|DY392568.1|DY392568	790	97.61	753	15	3	1	751	39	790	0	1288
14727_Transcript_1/2_Confidence_1.000_Length_1114_45	1114	gi|87139285|gb|DY383896.1|DY383896	713	94.75	400	19	2	527	925	425	27	7e-178	621
14727_Transcript_1/2_Confidence_1.000_Length_1114_45	1114	gi|87139285|gb|DY383896.1|DY383896	713	92.07	290	23	0	170	459	713	424	6e-114	409
14727_Transcript_1/2_Confidence_1.000_Length_1114_45	1114	gi|87139286|gb|DY383897.1|DY383897	749	89.35	460	32	7	1	459	43	486	4e-160	562
14727_Transcript_1/2_Confidence_1.000_Length_1114_45	1114	gi|87139286|gb|DY383897.1|DY383897	749	94.74	266	12	2	527	791	485	749	4e-115	412
14737_Transcript_3/3_Confidence_0.778_Length_1612_45	1612	gi|87142159|gb|DY386770.1|DY386770	339	89.13	230	23	2	645	873	320	92	1e-76	285
14744_Transcript_1/2_Confidence_1.000_Length_513_45	513	gi|87147478|gb|DY392089.1|DY392089	862	98.48	66	0	1	386	450	795	730	6e-26	115
14744_Transcript_1/2_Confidence_1.000_Length_513_45	513	gi|87147478|gb|DY392089.1|DY392089	862	95.31	64	3	0	450	513	644	581	5e-22	102
14762_Transcript_1/1_Confidence_1.000_Length_249_45	249	gi|87145339|gb|DY389950.1|DY389950	779	96.77	93	2	1	157	249	173	264	6e-38	154
14828_Transcript_1/2_Confidence_1.000_Length_965_45	965	gi|87138668|gb|DY383279.1|DY383279	829	95.11	756	34	3	184	937	764	10	0	1188
14828_Transcript_1/2_Confidence_1.000_Length_965_45	965	gi|87138673|gb|DY383284.1|DY383284	768	90.94	773	38	14	69	817	1	765	0	1011
14828_Transcript_1/2_Confidence_1.000_Length_965_45	965	gi|87147860|gb|DY392471.1|DY392471	855	86.74	694	85	7	258	947	767	77	0	765
14836_Transcript_1/3_Confidence_0.800_Length_1074_45	1074	gi|87143592|gb|DY388203.1|DY388203	579	81.99	483	47	23	552	1007	23	492	2e-103	374
14836_Transcript_1/3_Confidence_0.800_Length_1074_45	1074	gi|87143594|gb|DY388205.1|DY388205	539	81.99	483	47	23	552	1007	15	484	2e-103	374
14836_Transcript_1/3_Confidence_0.800_Length_1074_45	1074	gi|87143593|gb|DY388204.1|DY388204	547	81.5	481	51	21	552	1006	525	57	2e-99	361
14836_Transcript_1/3_Confidence_0.800_Length_1074_45	1074	gi|87143595|gb|DY388206.1|DY388206	546	80.25	481	57	21	552	1006	524	56	2e-89	327
14836_Transcript_2/3_Confidence_0.800_Length_1715_45	1715	gi|87143594|gb|DY388205.1|DY388205	539	82.49	497	47	23	1179	1648	1	484	5e-111	399
14836_Transcript_2/3_Confidence_0.800_Length_1715_45	1715	gi|87143592|gb|DY388203.1|DY388203	579	82.46	496	47	23	1180	1648	10	492	2e-110	398
14836_Transcript_2/3_Confidence_0.800_Length_1715_45	1715	gi|87143593|gb|DY388204.1|DY388204	547	82.02	495	51	21	1179	1647	539	57	4e-107	387
14836_Transcript_2/3_Confidence_0.800_Length_1715_45	1715	gi|87143595|gb|DY388206.1|DY388206	546	80.81	495	57	21	1179	1647	538	56	4e-97	353
1483_Transcript_4/8_Confidence_0.500_Length_1509_45	1509	gi|87139622|gb|DY384233.1|DY384233	861	82.82	710	100	20	72	770	163	861	4e-176	616
1483_Transcript_4/8_Confidence_0.500_Length_1509_45	1509	gi|87142432|gb|DY387043.1|DY387043	597	79.28	531	64	33	964	1458	4	524	6e-90	329
1483_Transcript_4/8_Confidence_0.500_Length_1509_45	1509	gi|87142433|gb|DY387044.1|DY387044	601	79.25	530	64	33	965	1458	591	72	2e-89	327
14844_Transcript_1/1_Confidence_1.000_Length_443_45	443	gi|87146962|gb|DY391573.1|DY391573	809	93.33	45	3	0	399	443	402	446	2e-11	67.6
14917_Transcript_2/3_Confidence_0.400_Length_1245_45	1245	gi|87138467|gb|DY383078.1|DY383078	915	96.44	281	8	2	370	649	634	913	5e-130	462
14917_Transcript_2/3_Confidence_0.400_Length_1245_45	1245	gi|87138462|gb|DY383073.1|DY383073	831	91.36	301	14	4	543	843	831	543	1e-111	401
14929_Transcript_1/1_Confidence_1.000_Length_346_45	346	gi|87146868|gb|DY391479.1|DY391479	505	88.89	234	21	4	1	231	273	504	1e-76	283
14929_Transcript_1/1_Confidence_1.000_Length_346_45	346	gi|87146867|gb|DY391478.1|DY391478	505	88.03	234	23	4	1	231	233	2	2e-73	272
1498_Transcript_3/3_Confidence_0.600_Length_1733_45	1733	gi|87141222|gb|DY385833.1|DY385833	802	92.11	798	55	6	10	803	9	802	0	1118
1498_Transcript_3/3_Confidence_0.600_Length_1733_45	1733	gi|87141219|gb|DY385830.1|DY385830	313	88.03	284	28	6	1306	1586	313	33	2e-90	331
14999_Transcript_1/1_Confidence_1.000_Length_721_45	721	gi|87141721|gb|DY386332.1|DY386332	754	88.18	296	30	5	427	721	359	650	8e-96	348
14999_Transcript_1/1_Confidence_1.000_Length_721_45	721	gi|87141722|gb|DY386333.1|DY386333	781	88.37	129	13	2	594	721	780	653	2e-37	154
14_Transcript_12/20_Confidence_0.214_Length_738_45	738	gi|87150697|gb|DY395308.1|DY395308	622	89.47	247	10	13	499	738	374	611	9e-81	298
14_Transcript_12/20_Confidence_0.214_Length_738_45	738	gi|87150698|gb|DY395309.1|DY395309	646	88.21	246	13	13	499	737	237	1	3e-75	279
14_Transcript_12/20_Confidence_0.214_Length_738_45	738	gi|87149581|gb|DY394192.1|DY394192	464	88.65	229	10	14	499	720	243	462	9e-71	265
14_Transcript_12/20_Confidence_0.214_Length_738_45	738	gi|87147218|gb|DY391829.1|DY391829	451	88.39	224	10	14	499	715	237	451	5e-68	255
14_Transcript_12/20_Confidence_0.214_Length_738_45	738	gi|87150092|gb|DY394703.1|DY394703	669	88.39	224	10	14	499	715	455	669	5e-68	255
14_Transcript_12/20_Confidence_0.214_Length_738_45	738	gi|87144003|gb|DY388614.1|DY388614	675	88.18	220	10	14	499	711	465	675	9e-66	248
14_Transcript_12/20_Confidence_0.214_Length_738_45	738	gi|87149582|gb|DY394193.1|DY394193	452	88.13	219	10	14	499	710	210	1	3e-65	246
14_Transcript_12/20_Confidence_0.214_Length_738_45	738	gi|87144758|gb|DY389369.1|DY389369	681	87.5	224	12	14	499	715	215	1	1e-64	244
14_Transcript_12/20_Confidence_0.214_Length_738_45	738	gi|87144004|gb|DY388615.1|DY388615	674	86.3	219	14	14	499	710	210	1	1e-58	224
14_Transcript_12/20_Confidence_0.214_Length_738_45	738	gi|87142389|gb|DY387000.1|DY387000	651	87.94	199	8	14	499	690	462	651	2e-57	220
14_Transcript_12/20_Confidence_0.214_Length_738_45	738	gi|87150093|gb|DY394704.1|DY394704	669	85.27	224	17	13	499	715	215	1	2e-56	217
14_Transcript_12/20_Confidence_0.214_Length_738_45	738	gi|87144084|gb|DY388695.1|DY388695	714	84.82	224	13	15	483	690	443	661	5e-53	206
14_Transcript_12/20_Confidence_0.214_Length_738_45	738	gi|87144986|gb|DY389597.1|DY389597	805	84.82	224	13	15	483	690	263	45	5e-53	206
14_Transcript_12/20_Confidence_0.214_Length_738_45	738	gi|87145726|gb|DY390337.1|DY390337	800	84.82	224	13	15	483	690	324	542	5e-53	206
14_Transcript_12/20_Confidence_0.214_Length_738_45	738	gi|87147140|gb|DY391751.1|DY391751	734	84.82	224	13	15	483	690	459	677	5e-53	206
14_Transcript_12/20_Confidence_0.214_Length_738_45	738	gi|87147651|gb|DY392262.1|DY392262	527	84.82	224	13	15	483	690	260	478	5e-53	206
14_Transcript_12/20_Confidence_0.214_Length_738_45	738	gi|87148315|gb|DY392926.1|DY392926	858	84.82	224	13	15	483	690	743	525	5e-53	206
14_Transcript_12/20_Confidence_0.214_Length_738_45	738	gi|87148484|gb|DY393095.1|DY393095	757	84.82	224	13	15	483	690	477	695	5e-53	206
14_Transcript_12/20_Confidence_0.214_Length_738_45	738	gi|87144085|gb|DY388696.1|DY388696	713	84	225	13	17	483	690	271	53	1e-49	195
14_Transcript_12/20_Confidence_0.214_Length_738_45	738	gi|87147721|gb|DY392332.1|DY392332	724	84	225	13	15	483	690	276	58	1e-49	195
14_Transcript_12/20_Confidence_0.214_Length_738_45	738	gi|87147652|gb|DY392263.1|DY392263	560	83.63	226	12	19	483	690	268	50	5e-48	189
14_Transcript_12/20_Confidence_0.214_Length_738_45	738	gi|87147141|gb|DY391752.1|DY391752	699	82.59	224	18	15	483	690	276	58	1e-44	178
14_Transcript_12/20_Confidence_0.214_Length_738_45	738	gi|87142390|gb|DY387001.1|DY387001	635	85.96	178	10	13	499	669	174	5	4e-44	176
14_Transcript_12/20_Confidence_0.214_Length_738_45	738	gi|87148485|gb|DY393096.1|DY393096	657	81.25	224	21	16	483	690	280	62	1e-39	161
14_Transcript_12/20_Confidence_0.214_Length_738_45	738	gi|87149068|gb|DY393679.1|DY393679	517	88.3	94	4	6	499	587	424	515	6e-23	106
14_Transcript_12/20_Confidence_0.214_Length_738_45	738	gi|87149069|gb|DY393680.1|DY393680	524	88.3	94	4	6	499	587	93	2	6e-23	106
14_Transcript_18/20_Confidence_0.179_Length_1409_45	1409	gi|87150697|gb|DY395308.1|DY395308	622	92.31	234	7	10	1179	1409	386	611	1e-87	322
14_Transcript_18/20_Confidence_0.179_Length_1409_45	1409	gi|87147140|gb|DY391751.1|DY391751	734	78.03	578	62	45	282	829	9	551	4e-82	303
14_Transcript_18/20_Confidence_0.179_Length_1409_45	1409	gi|87147140|gb|DY391751.1|DY391751	734	89.21	139	9	4	142	277	9	144	1e-41	169
14_Transcript_18/20_Confidence_0.179_Length_1409_45	1409	gi|87150698|gb|DY395309.1|DY395309	646	90.99	233	10	10	1179	1408	225	1	4e-82	303
14_Transcript_18/20_Confidence_0.179_Length_1409_45	1409	gi|87150092|gb|DY394703.1|DY394703	669	78.05	565	60	49	291	829	9	535	2e-80	298
14_Transcript_18/20_Confidence_0.179_Length_1409_45	1409	gi|87150092|gb|DY394703.1|DY394703	669	91.47	211	7	10	1179	1386	467	669	6e-75	279
14_Transcript_18/20_Confidence_0.179_Length_1409_45	1409	gi|87150093|gb|DY394704.1|DY394704	669	78.05	565	60	49	291	829	661	135	2e-80	298
14_Transcript_18/20_Confidence_0.179_Length_1409_45	1409	gi|87150093|gb|DY394704.1|DY394704	669	88.15	211	14	10	1179	1386	203	1	3e-63	241
14_Transcript_18/20_Confidence_0.179_Length_1409_45	1409	gi|87142389|gb|DY387000.1|DY387000	651	78.21	537	60	45	319	829	37	542	3e-78	291
14_Transcript_18/20_Confidence_0.179_Length_1409_45	1409	gi|87142389|gb|DY387000.1|DY387000	651	91.4	186	5	10	1179	1361	474	651	2e-64	244
14_Transcript_18/20_Confidence_0.179_Length_1409_45	1409	gi|87142390|gb|DY387001.1|DY387001	635	78.21	537	60	45	319	829	599	94	3e-78	291
14_Transcript_18/20_Confidence_0.179_Length_1409_45	1409	gi|87142390|gb|DY387001.1|DY387001	635	89.7	165	7	9	1179	1340	162	5	1e-51	202
14_Transcript_18/20_Confidence_0.179_Length_1409_45	1409	gi|87144003|gb|DY388614.1|DY388614	675	78.21	537	60	45	319	829	40	545	3e-78	291
14_Transcript_18/20_Confidence_0.179_Length_1409_45	1409	gi|87144003|gb|DY388614.1|DY388614	675	91.3	207	7	10	1179	1382	477	675	1e-72	272
14_Transcript_18/20_Confidence_0.179_Length_1409_45	1409	gi|87144004|gb|DY388615.1|DY388615	674	78.21	537	60	45	319	829	635	130	3e-78	291
14_Transcript_18/20_Confidence_0.179_Length_1409_45	1409	gi|87144004|gb|DY388615.1|DY388615	674	89.32	206	11	10	1179	1381	198	1	2e-65	248
14_Transcript_18/20_Confidence_0.179_Length_1409_45	1409	gi|87144758|gb|DY389369.1|DY389369	681	78.21	537	60	45	319	829	640	135	3e-78	291
14_Transcript_18/20_Confidence_0.179_Length_1409_45	1409	gi|87144758|gb|DY389369.1|DY389369	681	90.52	211	9	10	1179	1386	203	1	1e-71	268
14_Transcript_18/20_Confidence_0.179_Length_1409_45	1409	gi|87149581|gb|DY394192.1|DY394192	464	91.67	216	7	10	1179	1391	255	462	1e-77	289
14_Transcript_18/20_Confidence_0.179_Length_1409_45	1409	gi|87149069|gb|DY393680.1|DY393680	524	78.13	535	60	45	321	829	516	13	4e-77	287
14_Transcript_18/20_Confidence_0.179_Length_1409_45	1409	gi|87149069|gb|DY393680.1|DY393680	524	96.3	81	1	2	1179	1258	81	2	2e-30	132
14_Transcript_18/20_Confidence_0.179_Length_1409_45	1409	gi|87149068|gb|DY393679.1|DY393679	517	78.05	533	60	45	323	829	3	504	5e-76	283
14_Transcript_18/20_Confidence_0.179_Length_1409_45	1409	gi|87149068|gb|DY393679.1|DY393679	517	96.3	81	1	2	1179	1258	436	515	2e-30	132
14_Transcript_18/20_Confidence_0.179_Length_1409_45	1409	gi|87144084|gb|DY388695.1|DY388695	714	77.6	558	63	44	302	829	10	535	2e-75	281
14_Transcript_18/20_Confidence_0.179_Length_1409_45	1409	gi|87144084|gb|DY388695.1|DY388695	714	90.27	113	5	4	166	277	21	128	8e-34	143
14_Transcript_18/20_Confidence_0.179_Length_1409_45	1409	gi|87144085|gb|DY388696.1|DY388696	713	77.6	558	63	44	302	829	704	179	2e-75	281
14_Transcript_18/20_Confidence_0.179_Length_1409_45	1409	gi|87144085|gb|DY388696.1|DY388696	713	90.27	113	5	4	166	277	693	586	8e-34	143
14_Transcript_18/20_Confidence_0.179_Length_1409_45	1409	gi|87147218|gb|DY391829.1|DY391829	451	91.47	211	7	10	1179	1386	249	451	6e-75	279
14_Transcript_18/20_Confidence_0.179_Length_1409_45	1409	gi|87147721|gb|DY392332.1|DY392332	724	77.22	575	68	44	284	829	724	184	2e-74	278
14_Transcript_18/20_Confidence_0.179_Length_1409_45	1409	gi|87147721|gb|DY392332.1|DY392332	724	88.49	139	6	5	144	277	724	591	8e-39	159
14_Transcript_18/20_Confidence_0.179_Length_1409_45	1409	gi|87148484|gb|DY393095.1|DY393095	757	77.27	572	65	45	288	829	33	569	8e-74	276
14_Transcript_18/20_Confidence_0.179_Length_1409_45	1409	gi|87148484|gb|DY393095.1|DY393095	757	87.41	135	7	5	148	277	33	162	6e-35	147
14_Transcript_18/20_Confidence_0.179_Length_1409_45	1409	gi|87149582|gb|DY394193.1|DY394193	452	91.26	206	7	10	1179	1381	198	1	4e-72	270
14_Transcript_18/20_Confidence_0.179_Length_1409_45	1409	gi|87147219|gb|DY391830.1|DY391830	451	90.05	211	10	11	1179	1386	203	1	6e-70	263
14_Transcript_18/20_Confidence_0.179_Length_1409_45	1409	gi|87145726|gb|DY390337.1|DY390337	800	76.17	428	52	37	427	829	14	416	6e-45	180
14_Transcript_18/20_Confidence_0.179_Length_1409_45	1409	gi|87144986|gb|DY389597.1|DY389597	805	78.05	328	36	24	520	829	480	171	3e-43	174
14_Transcript_18/20_Confidence_0.179_Length_1409_45	1409	gi|87147651|gb|DY392262.1|DY392262	527	78.05	328	36	24	520	829	43	352	3e-43	174
14_Transcript_18/20_Confidence_0.179_Length_1409_45	1409	gi|87147652|gb|DY392263.1|DY392263	560	77.74	328	37	24	520	829	485	176	1e-41	169
14_Transcript_18/20_Confidence_0.179_Length_1409_45	1409	gi|87148315|gb|DY392926.1|DY392926	858	77.78	216	18	18	631	829	853	651	1e-22	106
14_Transcript_18/20_Confidence_0.179_Length_1409_45	1409	gi|87141090|gb|DY385701.1|DY385701	644	83.91	87	3	6	154	236	633	554	1e-12	73.1
14_Transcript_18/20_Confidence_0.179_Length_1409_45	1409	gi|87143456|gb|DY388067.1|DY388067	642	82.76	87	4	6	154	236	634	555	5e-11	67.6
14_Transcript_2/20_Confidence_1.000_Length_229_45	229	gi|87138470|gb|DY383081.1|DY383081	505	100	29	0	0	1	29	305	333	6e-08	54.7
14_Transcript_2/20_Confidence_1.000_Length_229_45	229	gi|87138471|gb|DY383082.1|DY383082	513	100	29	0	0	1	29	201	173	6e-08	54.7
14_Transcript_2/20_Confidence_1.000_Length_229_45	229	gi|87138695|gb|DY383306.1|DY383306	804	100	29	0	0	1	29	428	456	6e-08	54.7
14_Transcript_2/20_Confidence_1.000_Length_229_45	229	gi|87139183|gb|DY383794.1|DY383794	799	100	29	0	0	1	29	228	200	6e-08	54.7
14_Transcript_2/20_Confidence_1.000_Length_229_45	229	gi|87140238|gb|DY384849.1|DY384849	640	100	29	0	0	1	29	450	478	6e-08	54.7
14_Transcript_2/20_Confidence_1.000_Length_229_45	229	gi|87140239|gb|DY384850.1|DY384850	634	100	29	0	0	1	29	179	151	6e-08	54.7
14_Transcript_2/20_Confidence_1.000_Length_229_45	229	gi|87141248|gb|DY385859.1|DY385859	659	100	29	0	0	1	29	193	165	6e-08	54.7
14_Transcript_2/20_Confidence_1.000_Length_229_45	229	gi|87141250|gb|DY385861.1|DY385861	661	100	29	0	0	1	29	190	162	6e-08	54.7
14_Transcript_2/20_Confidence_1.000_Length_229_45	229	gi|87141251|gb|DY385862.1|DY385862	659	100	29	0	0	1	29	474	502	6e-08	54.7
14_Transcript_2/20_Confidence_1.000_Length_229_45	229	gi|87141253|gb|DY385864.1|DY385864	657	100	29	0	0	1	29	472	500	6e-08	54.7
14_Transcript_2/20_Confidence_1.000_Length_229_45	229	gi|87142483|gb|DY387094.1|DY387094	430	100	29	0	0	1	29	56	28	6e-08	54.7
14_Transcript_2/20_Confidence_1.000_Length_229_45	229	gi|87142916|gb|DY387527.1|DY387527	476	100	29	0	0	1	29	388	416	6e-08	54.7
14_Transcript_2/20_Confidence_1.000_Length_229_45	229	gi|87142917|gb|DY387528.1|DY387528	463	100	29	0	0	1	29	375	403	6e-08	54.7
14_Transcript_2/20_Confidence_1.000_Length_229_45	229	gi|87143636|gb|DY388247.1|DY388247	685	100	29	0	0	1	29	466	494	6e-08	54.7
14_Transcript_20/20_Confidence_0.268_Length_744_45	744	gi|87144084|gb|DY388695.1|DY388695	714	77.72	202	31	13	329	520	104	301	1e-24	111
14_Transcript_20/20_Confidence_0.268_Length_744_45	744	gi|87144085|gb|DY388696.1|DY388696	713	77.72	202	31	13	329	520	610	413	1e-24	111
14_Transcript_20/20_Confidence_0.268_Length_744_45	744	gi|87147140|gb|DY391751.1|DY391751	734	77.72	202	31	13	329	520	120	317	1e-24	111
14_Transcript_20/20_Confidence_0.268_Length_744_45	744	gi|87148484|gb|DY393095.1|DY393095	757	77.72	202	31	13	329	520	138	335	1e-24	111
14_Transcript_20/20_Confidence_0.268_Length_744_45	744	gi|87138695|gb|DY383306.1|DY383306	804	84.82	112	14	2	223	334	333	441	4e-24	110
14_Transcript_20/20_Confidence_0.268_Length_744_45	744	gi|87140238|gb|DY384849.1|DY384849	640	84.82	112	14	2	223	334	355	463	4e-24	110
14_Transcript_20/20_Confidence_0.268_Length_744_45	744	gi|87140239|gb|DY384850.1|DY384850	634	84.82	112	14	2	223	334	274	166	4e-24	110
14_Transcript_20/20_Confidence_0.268_Length_744_45	744	gi|87141248|gb|DY385859.1|DY385859	659	84.82	112	14	2	223	334	288	180	4e-24	110
14_Transcript_20/20_Confidence_0.268_Length_744_45	744	gi|87141250|gb|DY385861.1|DY385861	661	84.82	112	14	2	223	334	285	177	4e-24	110
14_Transcript_20/20_Confidence_0.268_Length_744_45	744	gi|87141251|gb|DY385862.1|DY385862	659	84.82	112	14	2	223	334	379	487	4e-24	110
14_Transcript_20/20_Confidence_0.268_Length_744_45	744	gi|87141253|gb|DY385864.1|DY385864	657	84.82	112	14	2	223	334	377	485	4e-24	110
14_Transcript_20/20_Confidence_0.268_Length_744_45	744	gi|87147721|gb|DY392332.1|DY392332	724	77.61	201	31	13	329	519	615	419	4e-24	110
14_Transcript_20/20_Confidence_0.268_Length_744_45	744	gi|87138470|gb|DY383081.1|DY383081	505	84.07	113	13	4	223	334	210	318	2e-22	104
14_Transcript_20/20_Confidence_0.268_Length_744_45	744	gi|87138471|gb|DY383082.1|DY383082	513	84.07	113	13	4	223	334	296	188	2e-22	104
14_Transcript_20/20_Confidence_0.268_Length_744_45	744	gi|87139183|gb|DY383794.1|DY383794	799	84.07	113	13	4	223	334	323	215	2e-22	104
14_Transcript_20/20_Confidence_0.268_Length_744_45	744	gi|87142483|gb|DY387094.1|DY387094	430	84.07	113	13	4	223	334	151	43	2e-22	104
14_Transcript_20/20_Confidence_0.268_Length_744_45	744	gi|87142916|gb|DY387527.1|DY387527	476	84.07	113	13	4	223	334	293	401	2e-22	104
14_Transcript_20/20_Confidence_0.268_Length_744_45	744	gi|87142917|gb|DY387528.1|DY387528	463	84.07	113	13	4	223	334	280	388	2e-22	104
14_Transcript_20/20_Confidence_0.268_Length_744_45	744	gi|87143636|gb|DY388247.1|DY388247	685	84.07	113	13	4	223	334	371	479	2e-22	104
14_Transcript_20/20_Confidence_0.268_Length_744_45	744	gi|87149683|gb|DY394294.1|DY394294	563	84.07	113	13	4	223	334	254	362	2e-22	104
14_Transcript_20/20_Confidence_0.268_Length_744_45	744	gi|87149684|gb|DY394295.1|DY394295	531	84.07	113	13	4	223	334	278	170	2e-22	104
14_Transcript_20/20_Confidence_0.268_Length_744_45	744	gi|87145726|gb|DY390337.1|DY390337	800	78.03	173	27	10	355	520	14	182	9e-21	99
15024_Transcript_1/1_Confidence_1.000_Length_425_45	425	gi|87139363|gb|DY383974.1|DY383974	666	82.03	423	38	25	1	413	432	38	2e-89	326
15024_Transcript_1/1_Confidence_1.000_Length_425_45	425	gi|87141816|gb|DY386427.1|DY386427	774	81.52	422	41	24	1	413	414	21	2e-85	313
15024_Transcript_1/1_Confidence_1.000_Length_425_45	425	gi|87138816|gb|DY383427.1|DY383427	646	85.48	303	32	10	1	294	397	98	3e-83	305
15024_Transcript_1/1_Confidence_1.000_Length_425_45	425	gi|87138817|gb|DY383428.1|DY383428	822	85.2	304	32	11	1	294	496	796	1e-81	300
15024_Transcript_1/1_Confidence_1.000_Length_425_45	425	gi|87141815|gb|DY386426.1|DY386426	656	89.32	234	23	2	1	233	418	650	2e-79	292
15048_Transcript_1/1_Confidence_1.000_Length_523_45	523	gi|87148162|gb|DY392773.1|DY392773	360	87.33	221	20	8	245	460	68	285	2e-65	246
15048_Transcript_1/1_Confidence_1.000_Length_523_45	523	gi|87148163|gb|DY392774.1|DY392774	342	87.33	221	20	8	245	460	286	69	2e-65	246
15064_Transcript_1/1_Confidence_1.000_Length_207_45	207	gi|87145765|gb|DY390376.1|DY390376	779	98.88	89	1	0	119	207	9	97	1e-39	159
15097_Transcript_3/3_Confidence_0.600_Length_1823_45	1823	gi|87147698|gb|DY392309.1|DY392309	807	99.38	807	4	1	16	821	1	807	0	1461
15097_Transcript_3/3_Confidence_0.600_Length_1823_45	1823	gi|87147699|gb|DY392310.1|DY392310	660	97.13	418	2	7	1383	1800	408	1	0	697
1509_Transcript_1/2_Confidence_1.000_Length_1579_45	1579	gi|87149796|gb|DY394407.1|DY394407	785	85.68	768	94	15	177	937	762	4	0	795
1509_Transcript_1/2_Confidence_1.000_Length_1579_45	1579	gi|87141651|gb|DY386262.1|DY386262	575	91.07	549	39	9	896	1438	3	547	0	734
1509_Transcript_1/2_Confidence_1.000_Length_1579_45	1579	gi|87141650|gb|DY386261.1|DY386261	574	90.91	550	39	10	896	1438	574	29	0	728
15117_Transcript_1/1_Confidence_1.000_Length_247_45	247	gi|87148689|gb|DY393300.1|DY393300	875	79.92	239	35	9	17	247	160	393	1e-40	163
15117_Transcript_1/1_Confidence_1.000_Length_247_45	247	gi|87148688|gb|DY393299.1|DY393299	794	79.58	240	35	10	17	247	763	529	1e-39	159
15162_Transcript_1/3_Confidence_0.600_Length_1610_45	1610	gi|87147163|gb|DY391774.1|DY391774	834	98.23	793	14	0	818	1610	834	42	0	1387
15162_Transcript_2/3_Confidence_0.400_Length_1945_45	1945	gi|87147163|gb|DY391774.1|DY391774	834	98.23	793	14	0	1153	1945	834	42	0	1387
15162_Transcript_2/3_Confidence_0.400_Length_1945_45	1945	gi|87147162|gb|DY391773.1|DY391773	751	98.59	495	7	0	1	495	257	751	0	876
15167_Transcript_2/2_Confidence_1.000_Length_1051_45	1051	gi|87149494|gb|DY394105.1|DY394105	845	85.53	152	9	11	559	702	396	542	5e-35	147
15221_Transcript_1/1_Confidence_1.000_Length_490_45	490	gi|87145622|gb|DY390233.1|DY390233	517	100	70	0	0	1	70	288	219	2e-30	130
15221_Transcript_1/1_Confidence_1.000_Length_490_45	490	gi|87145621|gb|DY390232.1|DY390232	574	98.59	71	0	1	1	70	237	307	1e-28	124
15270_Transcript_1/3_Confidence_0.667_Length_927_45	927	gi|87138553|gb|DY383164.1|DY383164	755	88	800	40	38	75	863	755	1	0	894
15270_Transcript_1/3_Confidence_0.667_Length_927_45	927	gi|87138554|gb|DY383165.1|DY383165	711	83.6	750	65	39	71	808	8	711	0	651
15270_Transcript_3/3_Confidence_0.667_Length_906_45	906	gi|87138553|gb|DY383164.1|DY383164	755	90.24	779	41	31	75	842	755	1	0	985
15270_Transcript_3/3_Confidence_0.667_Length_906_45	906	gi|87138554|gb|DY383165.1|DY383165	711	85.87	729	66	32	71	787	8	711	0	741
15271_Transcript_1/1_Confidence_1.000_Length_273_45	273	gi|87149869|gb|DY394480.1|DY394480	865	94.24	139	5	2	1	137	88	225	1e-54	209
15271_Transcript_1/1_Confidence_1.000_Length_273_45	273	gi|87149870|gb|DY394481.1|DY394481	862	94.24	139	5	2	1	137	848	711	1e-54	209
1528_Transcript_2/4_Confidence_0.700_Length_3779_45	3779	gi|87140974|gb|DY385585.1|DY385585	818	95.47	816	35	2	2065	2879	815	1	0	1301
1528_Transcript_2/4_Confidence_0.700_Length_3779_45	3779	gi|87140975|gb|DY385586.1|DY385586	792	88.42	691	44	30	36	710	45	715	0	800
1528_Transcript_2/4_Confidence_0.700_Length_3779_45	3779	gi|87143538|gb|DY388149.1|DY388149	558	82.1	553	81	18	920	1463	558	15	7e-128	457
1528_Transcript_2/4_Confidence_0.700_Length_3779_45	3779	gi|87143541|gb|DY388152.1|DY388152	558	81.92	553	82	18	920	1463	1	544	3e-126	451
15316_Transcript_1/1_Confidence_1.000_Length_1345_45	1345	gi|87144866|gb|DY389477.1|DY389477	908	90.6	149	7	7	1	145	442	587	3e-48	191
15316_Transcript_1/1_Confidence_1.000_Length_1345_45	1345	gi|87145641|gb|DY390252.1|DY390252	616	93.26	89	5	1	2	89	105	17	6e-30	130
15316_Transcript_1/1_Confidence_1.000_Length_1345_45	1345	gi|87145642|gb|DY390253.1|DY390253	571	93.26	89	5	1	2	89	477	565	6e-30	130
15332_Transcript_1/6_Confidence_0.333_Length_445_45	445	gi|87148375|gb|DY392986.1|DY392986	860	98.69	153	2	0	293	445	8	160	3e-73	272
15332_Transcript_1/6_Confidence_0.333_Length_445_45	445	gi|87148376|gb|DY392987.1|DY392987	850	100	34	0	0	412	445	850	817	2e-10	63.9
153_Transcript_1/1_Confidence_1.000_Length_572_45	572	gi|87144521|gb|DY389132.1|DY389132	841	99.2	373	1	2	6	378	33	403	0	671
153_Transcript_1/1_Confidence_1.000_Length_572_45	572	gi|87144521|gb|DY389132.1|DY389132	841	94.42	197	11	0	376	572	239	435	1e-82	303
153_Transcript_1/1_Confidence_1.000_Length_572_45	572	gi|87144964|gb|DY389575.1|DY389575	715	99.44	356	2	0	23	378	11	366	0	647
153_Transcript_1/1_Confidence_1.000_Length_572_45	572	gi|87144964|gb|DY389575.1|DY389575	715	94.42	197	11	0	376	572	202	398	1e-82	303
153_Transcript_1/1_Confidence_1.000_Length_572_45	572	gi|87138260|gb|DY382871.1|DY382871	626	96.34	273	10	0	106	378	10	282	2e-126	449
153_Transcript_1/1_Confidence_1.000_Length_572_45	572	gi|87138260|gb|DY382871.1|DY382871	626	93	200	12	2	374	572	116	314	1e-78	291
153_Transcript_1/1_Confidence_1.000_Length_572_45	572	gi|87138265|gb|DY382876.1|DY382876	626	96.34	273	10	0	106	378	617	345	2e-126	449
153_Transcript_1/1_Confidence_1.000_Length_572_45	572	gi|87138265|gb|DY382876.1|DY382876	626	93	200	12	2	374	572	511	313	1e-78	291
153_Transcript_1/1_Confidence_1.000_Length_572_45	572	gi|87140511|gb|DY385122.1|DY385122	677	100	199	0	0	374	572	154	352	5e-102	368
153_Transcript_1/1_Confidence_1.000_Length_572_45	572	gi|87140511|gb|DY385122.1|DY385122	677	92.62	244	16	2	136	378	78	320	2e-96	350
153_Transcript_1/1_Confidence_1.000_Length_572_45	572	gi|87140512|gb|DY385123.1|DY385123	765	100	199	0	0	374	572	606	408	5e-102	368
153_Transcript_1/1_Confidence_1.000_Length_572_45	572	gi|87140512|gb|DY385123.1|DY385123	765	92.62	244	16	2	136	378	682	440	2e-96	350
153_Transcript_1/1_Confidence_1.000_Length_572_45	572	gi|87145892|gb|DY390503.1|DY390503	669	100	199	0	0	374	572	599	401	5e-102	368
153_Transcript_1/1_Confidence_1.000_Length_572_45	572	gi|87145892|gb|DY390503.1|DY390503	669	92.02	238	17	2	142	378	669	433	2e-91	333
153_Transcript_1/1_Confidence_1.000_Length_572_45	572	gi|87145893|gb|DY390504.1|DY390504	688	100	199	0	0	374	572	257	455	5e-102	368
153_Transcript_1/1_Confidence_1.000_Length_572_45	572	gi|87145893|gb|DY390504.1|DY390504	688	92.62	244	16	2	136	378	181	423	2e-96	350
15412_Transcript_4/5_Confidence_0.538_Length_1752_45	1752	gi|87141377|gb|DY385988.1|DY385988	715	94.91	687	35	0	386	1072	3	689	0	1075
15412_Transcript_4/5_Confidence_0.538_Length_1752_45	1752	gi|87141377|gb|DY385988.1|DY385988	715	100	31	0	0	1173	1203	685	715	4e-08	58.4
15412_Transcript_4/5_Confidence_0.538_Length_1752_45	1752	gi|87141378|gb|DY385989.1|DY385989	840	88.83	582	34	14	1173	1752	606	54	0	686
15412_Transcript_4/5_Confidence_0.538_Length_1752_45	1752	gi|87141378|gb|DY385989.1|DY385989	840	93.31	239	16	0	834	1072	840	602	4e-97	353
15415_Transcript_2/2_Confidence_1.000_Length_446_45	446	gi|87150283|gb|DY394894.1|DY394894	833	92.17	217	7	4	230	446	1	207	5e-81	298
15415_Transcript_2/2_Confidence_1.000_Length_446_45	446	gi|87139354|gb|DY383965.1|DY383965	723	85.66	265	20	10	187	446	8	259	2e-70	263
15456_Transcript_2/2_Confidence_1.000_Length_944_45	944	gi|87138518|gb|DY383129.1|DY383129	686	94.17	463	18	7	483	942	146	602	0	697
15456_Transcript_2/2_Confidence_1.000_Length_944_45	944	gi|87138519|gb|DY383130.1|DY383130	677	94.17	463	18	7	483	942	542	86	0	697
15456_Transcript_2/2_Confidence_1.000_Length_944_45	944	gi|87138662|gb|DY383273.1|DY383273	827	94.17	463	18	7	483	942	539	83	0	697
15456_Transcript_2/2_Confidence_1.000_Length_944_45	944	gi|87138663|gb|DY383274.1|DY383274	868	93.4	318	15	4	483	798	547	860	3e-131	466
15477_Transcript_1/3_Confidence_0.429_Length_261_45	261	gi|87147400|gb|DY392011.1|DY392011	714	88.16	76	6	3	1	75	79	6	7e-18	87.9
15477_Transcript_1/3_Confidence_0.429_Length_261_45	261	gi|87150541|gb|DY395152.1|DY395152	823	100	38	0	0	1	38	38	1	7e-13	71.3
1557_Transcript_1/8_Confidence_0.412_Length_844_45	844	gi|87138815|gb|DY383426.1|DY383426	781	92.29	700	30	18	1	684	90	781	0	972
1557_Transcript_1/8_Confidence_0.412_Length_844_45	844	gi|87145513|gb|DY390124.1|DY390124	455	98.08	365	7	0	1	365	373	9	0	636
1557_Transcript_1/8_Confidence_0.412_Length_844_45	844	gi|87145514|gb|DY390125.1|DY390125	335	98.47	327	5	0	39	365	1	327	3e-165	579
1557_Transcript_1/8_Confidence_0.412_Length_844_45	844	gi|87138814|gb|DY383425.1|DY383425	653	97.89	332	6	1	363	693	653	322	1e-163	573
1557_Transcript_1/8_Confidence_0.412_Length_844_45	844	gi|87144574|gb|DY389185.1|DY389185	947	90.75	346	26	6	333	675	463	805	2e-128	457
1557_Transcript_4/8_Confidence_0.588_Length_1441_45	1441	gi|87138814|gb|DY383425.1|DY383425	653	94.5	655	24	8	775	1427	653	9	0	1000
1557_Transcript_4/8_Confidence_0.588_Length_1441_45	1441	gi|87138815|gb|DY383426.1|DY383426	781	98.01	352	7	0	745	1096	430	781	5e-175	612
1557_Transcript_4/8_Confidence_0.588_Length_1441_45	1441	gi|87138815|gb|DY383426.1|DY383426	781	86.49	348	23	18	1	332	90	429	2e-99	361
1557_Transcript_4/8_Confidence_0.588_Length_1441_45	1441	gi|87145513|gb|DY390124.1|DY390124	455	98.78	327	4	0	1	327	373	47	4e-166	582
1557_Transcript_4/8_Confidence_0.588_Length_1441_45	1441	gi|87145513|gb|DY390124.1|DY390124	455	100	33	0	0	745	777	41	9	2e-09	62.1
1557_Transcript_4/8_Confidence_0.588_Length_1441_45	1441	gi|87145514|gb|DY390125.1|DY390125	335	98.3	294	5	0	39	332	1	294	1e-146	518
1557_Transcript_4/8_Confidence_0.588_Length_1441_45	1441	gi|87145514|gb|DY390125.1|DY390125	335	100	33	0	0	745	777	295	327	2e-09	62.1
1557_Transcript_4/8_Confidence_0.588_Length_1441_45	1441	gi|87144574|gb|DY389185.1|DY389185	947	89.03	392	34	9	737	1123	455	842	2e-134	477
1557_Transcript_5/8_Confidence_0.471_Length_1157_45	1157	gi|87138814|gb|DY383425.1|DY383425	653	93.97	564	23	7	581	1143	562	9	0	843
1557_Transcript_5/8_Confidence_0.471_Length_1157_45	1157	gi|87138814|gb|DY383425.1|DY383425	653	97.89	95	1	1	363	456	653	559	5e-40	163
1557_Transcript_5/8_Confidence_0.471_Length_1157_45	1157	gi|87145513|gb|DY390124.1|DY390124	455	98.08	365	7	0	1	365	373	9	0	636
1557_Transcript_5/8_Confidence_0.471_Length_1157_45	1157	gi|87138815|gb|DY383426.1|DY383426	781	89.62	472	25	18	1	456	90	553	4e-165	579
1557_Transcript_5/8_Confidence_0.471_Length_1157_45	1157	gi|87138815|gb|DY383426.1|DY383426	781	97.84	232	5	0	581	812	550	781	1e-111	401
1557_Transcript_5/8_Confidence_0.471_Length_1157_45	1157	gi|87145514|gb|DY390125.1|DY390125	335	98.47	327	5	0	39	365	1	327	4e-165	579
1557_Transcript_5/8_Confidence_0.471_Length_1157_45	1157	gi|87144574|gb|DY389185.1|DY389185	947	92.74	124	9	0	333	456	463	586	5e-45	180
15609_Transcript_1/2_Confidence_1.000_Length_864_45	864	gi|87146490|gb|DY391101.1|DY391101	382	97.01	334	8	2	1	333	341	9	1e-159	560
15609_Transcript_1/2_Confidence_1.000_Length_864_45	864	gi|87149910|gb|DY394521.1|DY394521	383	97.01	334	8	2	1	333	342	10	1e-159	560
15609_Transcript_1/2_Confidence_1.000_Length_864_45	864	gi|87149911|gb|DY394522.1|DY394522	365	96.55	319	9	2	1	318	48	365	1e-149	527
15609_Transcript_1/2_Confidence_1.000_Length_864_45	864	gi|87146491|gb|DY391102.1|DY391102	340	94.38	320	14	4	1	318	23	340	6e-138	488
15662_Transcript_2/3_Confidence_0.714_Length_999_45	999	gi|87139794|gb|DY384405.1|DY384405	248	91.39	244	14	4	543	779	5	248	1e-89	327
15662_Transcript_2/3_Confidence_0.714_Length_999_45	999	gi|87139795|gb|DY384406.1|DY384406	241	90.13	233	15	6	541	765	233	1	4e-80	296
15664_Transcript_2/3_Confidence_0.714_Length_1096_45	1096	gi|87139554|gb|DY384165.1|DY384165	833	94.76	744	34	5	95	837	64	803	0	1153
15664_Transcript_2/3_Confidence_0.714_Length_1096_45	1096	gi|87139553|gb|DY384164.1|DY384164	672	94.93	375	16	3	464	837	672	300	9e-167	584
15664_Transcript_2/3_Confidence_0.714_Length_1096_45	1096	gi|87139553|gb|DY384164.1|DY384164	672	94.35	230	11	1	866	1093	301	72	1e-96	351
15752_Transcript_3/3_Confidence_0.600_Length_1697_45	1697	gi|87148623|gb|DY393234.1|DY393234	599	100	494	0	0	1204	1697	596	103	0	913
15752_Transcript_3/3_Confidence_0.600_Length_1697_45	1697	gi|87148624|gb|DY393235.1|DY393235	634	99.19	493	2	2	1205	1697	7	497	0	887
15752_Transcript_3/3_Confidence_0.600_Length_1697_45	1697	gi|87138242|gb|DY382853.1|DY382853	776	84.87	337	41	10	1366	1697	169	500	2e-90	331
15752_Transcript_3/3_Confidence_0.600_Length_1697_45	1697	gi|87142689|gb|DY387300.1|DY387300	716	84.87	337	41	10	1366	1697	194	525	2e-90	331
15756_Transcript_1/1_Confidence_1.000_Length_290_45	290	gi|87141178|gb|DY385789.1|DY385789	840	97.32	112	3	0	179	290	4	115	6e-49	191
1579_Transcript_1/2_Confidence_1.000_Length_941_45	941	gi|87150011|gb|DY394622.1|DY394622	832	98.92	832	8	1	30	860	1	832	0	1485
1579_Transcript_1/2_Confidence_1.000_Length_941_45	941	gi|87150010|gb|DY394621.1|DY394621	852	98.9	819	7	2	75	891	852	34	0	1461
1579_Transcript_1/2_Confidence_1.000_Length_941_45	941	gi|87146604|gb|DY391215.1|DY391215	756	97.09	756	18	4	39	792	3	756	0	1271
1579_Transcript_1/2_Confidence_1.000_Length_941_45	941	gi|87146603|gb|DY391214.1|DY391214	711	97.76	713	12	4	181	891	711	1	0	1225
1579_Transcript_1/2_Confidence_1.000_Length_941_45	941	gi|87145737|gb|DY390348.1|DY390348	681	97.65	680	10	6	213	889	681	5	0	1162
1579_Transcript_1/2_Confidence_1.000_Length_941_45	941	gi|87147587|gb|DY392198.1|DY392198	708	97.91	479	6	4	421	897	485	9	0	826
1579_Transcript_1/2_Confidence_1.000_Length_941_45	941	gi|87147588|gb|DY392199.1|DY392199	568	97.91	479	6	4	421	897	84	560	0	826
15817_Transcript_1/2_Confidence_1.000_Length_356_45	356	gi|87138482|gb|DY383093.1|DY383093	296	86.91	191	21	4	159	347	8	196	5e-55	211
15817_Transcript_1/2_Confidence_1.000_Length_356_45	356	gi|87138483|gb|DY383094.1|DY383094	296	86.84	190	21	4	160	347	288	101	2e-54	209
15818_Transcript_1/1_Confidence_1.000_Length_324_45	324	gi|87138482|gb|DY383093.1|DY383093	296	97.22	72	2	0	240	311	296	225	2e-28	122
15818_Transcript_1/1_Confidence_1.000_Length_324_45	324	gi|87138483|gb|DY383094.1|DY383094	296	95.83	72	3	0	240	311	1	72	1e-26	117
15877_Transcript_1/3_Confidence_0.714_Length_1742_45	1742	gi|87140214|gb|DY384825.1|DY384825	863	98.75	642	8	0	2	643	94	735	0	1142
15877_Transcript_1/3_Confidence_0.714_Length_1742_45	1742	gi|87140214|gb|DY384825.1|DY384825	863	99.12	114	0	1	749	862	736	848	5e-52	204
15877_Transcript_1/3_Confidence_0.714_Length_1742_45	1742	gi|87143264|gb|DY387875.1|DY387875	784	98.13	642	11	1	2	642	93	734	0	1118
1596_Transcript_2/7_Confidence_0.714_Length_2604_45	2604	gi|87149847|gb|DY394458.1|DY394458	811	87.02	593	58	15	979	1557	623	36	0	651
1596_Transcript_2/7_Confidence_0.714_Length_2604_45	2604	gi|87149847|gb|DY394458.1|DY394458	811	88.42	190	20	2	700	888	810	622	4e-59	228
1596_Transcript_2/7_Confidence_0.714_Length_2604_45	2604	gi|87149848|gb|DY394459.1|DY394459	891	83.78	598	59	26	314	888	45	627	8e-151	532
1596_Transcript_2/7_Confidence_0.714_Length_2604_45	2604	gi|87149848|gb|DY394459.1|DY394459	891	87.6	258	20	8	979	1225	626	882	2e-77	289
1596_Transcript_2/7_Confidence_0.714_Length_2604_45	2604	gi|87138785|gb|DY383396.1|DY383396	787	85.81	458	52	9	433	888	684	238	5e-133	473
1596_Transcript_2/7_Confidence_0.714_Length_2604_45	2604	gi|87138785|gb|DY383396.1|DY383396	787	91.61	155	11	2	979	1132	239	86	1e-54	213
16109_Transcript_1/1_Confidence_1.000_Length_578_45	578	gi|87144834|gb|DY389445.1|DY389445	841	99.31	578	4	0	1	578	587	10	0	1046
16109_Transcript_1/1_Confidence_1.000_Length_578_45	578	gi|87144835|gb|DY389446.1|DY389446	819	99.23	518	4	0	1	518	302	819	0	935
16128_Transcript_1/1_Confidence_1.000_Length_464_45	464	gi|87139466|gb|DY384077.1|DY384077	605	88.84	224	21	4	1	222	156	377	3e-73	272
16128_Transcript_1/1_Confidence_1.000_Length_464_45	464	gi|87139467|gb|DY384078.1|DY384078	637	88.84	224	21	4	1	222	449	228	3e-73	272
16142_Transcript_1/1_Confidence_1.000_Length_260_45	260	gi|87143099|gb|DY387710.1|DY387710	653	94.12	51	3	0	22	72	58	8	4e-15	78.7
16197_Transcript_3/5_Confidence_0.600_Length_631_45	631	gi|87143954|gb|DY388565.1|DY388565	875	96.41	195	7	0	98	292	11	205	4e-88	322
16197_Transcript_3/5_Confidence_0.600_Length_631_45	631	gi|87144866|gb|DY389477.1|DY389477	908	81.79	390	38	31	255	631	116	485	3e-80	296
16197_Transcript_4/5_Confidence_0.333_Length_577_45	577	gi|87143954|gb|DY388565.1|DY388565	875	95.94	197	8	0	94	290	9	205	1e-87	320
16207_Transcript_1/1_Confidence_1.000_Length_728_45	728	gi|87148222|gb|DY392833.1|DY392833	839	99.86	728	1	0	1	728	47	774	0	1339
16207_Transcript_1/1_Confidence_1.000_Length_728_45	728	gi|87148222|gb|DY392833.1|DY392833	839	98.59	71	1	0	40	110	15	85	4e-29	126
16207_Transcript_1/1_Confidence_1.000_Length_728_45	728	gi|87148222|gb|DY392833.1|DY392833	839	100	39	0	0	1	39	118	156	6e-13	73.1
16207_Transcript_1/1_Confidence_1.000_Length_728_45	728	gi|87148223|gb|DY392834.1|DY392834	809	99.61	258	1	0	471	728	809	552	5e-133	472
1621_Transcript_2/3_Confidence_0.750_Length_551_45	551	gi|87142925|gb|DY387536.1|DY387536	682	89.15	553	49	7	1	551	17	560	0	678
1621_Transcript_2/3_Confidence_0.750_Length_551_45	551	gi|87146354|gb|DY390965.1|DY390965	661	91.38	383	29	3	172	551	558	177	3e-148	521
1621_Transcript_2/3_Confidence_0.750_Length_551_45	551	gi|87146355|gb|DY390966.1|DY390966	632	91.38	383	29	3	172	551	75	456	3e-148	521
1621_Transcript_2/3_Confidence_0.750_Length_551_45	551	gi|87139631|gb|DY384242.1|DY384242	715	90.62	384	30	5	172	551	100	481	3e-143	505
1621_Transcript_2/3_Confidence_0.750_Length_551_45	551	gi|87141935|gb|DY386546.1|DY386546	799	88.52	366	36	6	189	551	173	535	4e-123	438
1621_Transcript_2/3_Confidence_0.750_Length_551_45	551	gi|87141936|gb|DY386547.1|DY386547	794	88.52	366	36	6	189	551	623	261	4e-123	438
1621_Transcript_2/3_Confidence_0.750_Length_551_45	551	gi|87143495|gb|DY388106.1|DY388106	649	88.25	366	37	6	189	551	173	535	2e-121	433
1621_Transcript_2/3_Confidence_0.750_Length_551_45	551	gi|87143496|gb|DY388107.1|DY388107	690	84.51	368	47	8	189	551	542	180	4e-98	355
1621_Transcript_2/3_Confidence_0.750_Length_551_45	551	gi|87143498|gb|DY388109.1|DY388109	777	88.12	303	31	5	198	497	636	336	4e-98	355
1621_Transcript_2/3_Confidence_0.750_Length_551_45	551	gi|87146385|gb|DY390996.1|DY390996	816	90.37	187	18	0	365	551	807	621	2e-65	246
16231_Transcript_1/2_Confidence_1.000_Length_817_45	817	gi|87146832|gb|DY391443.1|DY391443	795	89.74	682	57	13	123	794	31	709	0	859
16231_Transcript_1/2_Confidence_1.000_Length_817_45	817	gi|87146833|gb|DY391444.1|DY391444	787	90.82	643	52	7	156	794	729	90	0	854
16245_Transcript_1/1_Confidence_1.000_Length_303_45	303	gi|87149718|gb|DY394329.1|DY394329	730	99.3	285	2	0	19	303	1	285	9e-147	516
16245_Transcript_1/1_Confidence_1.000_Length_303_45	303	gi|87138524|gb|DY383135.1|DY383135	450	97.18	284	8	0	20	303	445	162	3e-136	481
16245_Transcript_1/1_Confidence_1.000_Length_303_45	303	gi|87148149|gb|DY392760.1|DY392760	781	95.86	290	10	2	14	303	1	288	2e-132	468
16245_Transcript_1/1_Confidence_1.000_Length_303_45	303	gi|87138525|gb|DY383136.1|DY383136	478	94.72	284	14	1	20	302	1	284	5e-124	440
16270_Transcript_1/1_Confidence_1.000_Length_845_45	845	gi|87148847|gb|DY393458.1|DY393458	768	97.92	720	12	1	81	797	1	720	0	1243
16270_Transcript_1/1_Confidence_1.000_Length_845_45	845	gi|87148848|gb|DY393459.1|DY393459	756	97.88	708	12	1	81	785	744	37	0	1221
1629_Transcript_3/8_Confidence_0.650_Length_2734_45	2734	gi|87146049|gb|DY390660.1|DY390660	842	99.76	835	0	2	53	886	9	842	0	1530
1629_Transcript_3/8_Confidence_0.650_Length_2734_45	2734	gi|87146050|gb|DY390661.1|DY390661	726	99.61	259	0	1	1592	1850	258	1	2e-132	472
1629_Transcript_3/8_Confidence_0.650_Length_2734_45	2734	gi|87146050|gb|DY390661.1|DY390661	726	99.59	241	1	0	1196	1436	495	255	5e-123	440
1629_Transcript_3/8_Confidence_0.650_Length_2734_45	2734	gi|87146050|gb|DY390661.1|DY390661	726	99.14	233	2	0	890	1122	726	494	7e-117	420
1629_Transcript_5/8_Confidence_0.650_Length_2659_45	2659	gi|87146049|gb|DY390660.1|DY390660	842	99.4	835	3	2	53	886	9	842	0	1513
1629_Transcript_5/8_Confidence_0.650_Length_2659_45	2659	gi|87146050|gb|DY390661.1|DY390661	726	99.36	472	3	0	890	1361	726	255	0	856
1629_Transcript_5/8_Confidence_0.650_Length_2659_45	2659	gi|87146050|gb|DY390661.1|DY390661	726	99.61	259	0	1	1517	1775	258	1	2e-132	472
16370_Transcript_1/1_Confidence_1.000_Length_1309_45	1309	gi|87145016|gb|DY389627.1|DY389627	767	95.16	764	37	0	341	1104	764	1	0	1206
16370_Transcript_1/1_Confidence_1.000_Length_1309_45	1309	gi|87143467|gb|DY388078.1|DY388078	969	91.46	878	53	14	5	878	110	969	0	1186
16370_Transcript_1/1_Confidence_1.000_Length_1309_45	1309	gi|87141692|gb|DY386303.1|DY386303	709	95.21	710	32	2	250	958	709	1	0	1122
16370_Transcript_1/1_Confidence_1.000_Length_1309_45	1309	gi|87145017|gb|DY389628.1|DY389628	790	91.2	807	51	12	17	820	1	790	0	1079
16370_Transcript_1/1_Confidence_1.000_Length_1309_45	1309	gi|87143466|gb|DY388077.1|DY388077	696	94.63	689	33	4	208	894	696	10	0	1064
16370_Transcript_1/1_Confidence_1.000_Length_1309_45	1309	gi|87143468|gb|DY388079.1|DY388079	773	89.26	698	55	12	5	699	93	773	0	856
16370_Transcript_1/1_Confidence_1.000_Length_1309_45	1309	gi|87144954|gb|DY389565.1|DY389565	845	87.47	471	57	2	695	1164	622	153	6e-154	542
16393_Transcript_1/3_Confidence_0.667_Length_1269_45	1269	gi|87150104|gb|DY394715.1|DY394715	804	98.74	794	8	2	476	1269	803	12	0	1410
16393_Transcript_1/3_Confidence_0.667_Length_1269_45	1269	gi|87138487|gb|DY383098.1|DY383098	844	95.42	459	21	0	439	897	291	749	0	732
16393_Transcript_1/3_Confidence_0.667_Length_1269_45	1269	gi|87138487|gb|DY383098.1|DY383098	844	88.78	294	14	11	85	360	1	293	7e-94	342
16393_Transcript_1/3_Confidence_0.667_Length_1269_45	1269	gi|87150105|gb|DY394716.1|DY394716	619	98.84	344	4	0	439	782	276	619	1e-175	614
16393_Transcript_1/3_Confidence_0.667_Length_1269_45	1269	gi|87150105|gb|DY394716.1|DY394716	619	97.48	278	7	0	83	360	1	278	6e-134	475
1641_Transcript_1/2_Confidence_1.000_Length_662_45	662	gi|87150197|gb|DY394808.1|DY394808	869	83.78	561	67	21	114	662	57	605	9e-145	510
1641_Transcript_1/2_Confidence_1.000_Length_662_45	662	gi|87150196|gb|DY394807.1|DY394807	813	83.54	559	68	21	116	662	810	264	5e-142	501
1641_Transcript_1/2_Confidence_1.000_Length_662_45	662	gi|87142635|gb|DY387246.1|DY387246	778	84.28	528	57	21	149	662	766	251	3e-139	492
1641_Transcript_1/2_Confidence_1.000_Length_662_45	662	gi|87144530|gb|DY389141.1|DY389141	834	84.22	526	60	20	149	662	673	159	1e-138	490
1641_Transcript_1/2_Confidence_1.000_Length_662_45	662	gi|87149593|gb|DY394204.1|DY394204	697	95.93	295	10	2	369	662	488	195	9e-135	477
1641_Transcript_1/2_Confidence_1.000_Length_662_45	662	gi|87149594|gb|DY394205.1|DY394205	697	95.93	295	10	2	369	662	210	503	9e-135	477
1641_Transcript_1/2_Confidence_1.000_Length_662_45	662	gi|87140015|gb|DY384626.1|DY384626	731	83.84	526	58	22	146	662	21	528	3e-134	475
1641_Transcript_1/2_Confidence_1.000_Length_662_45	662	gi|87142866|gb|DY387477.1|DY387477	540	83.39	542	61	24	118	644	534	7	3e-134	475
1641_Transcript_1/2_Confidence_1.000_Length_662_45	662	gi|87145479|gb|DY390090.1|DY390090	766	82.69	520	62	26	115	620	259	764	2e-122	436
1641_Transcript_1/2_Confidence_1.000_Length_662_45	662	gi|87139726|gb|DY384337.1|DY384337	674	81.82	528	71	22	149	662	13	529	2e-117	420
1641_Transcript_1/2_Confidence_1.000_Length_662_45	662	gi|87139725|gb|DY384336.1|DY384336	676	84.87	423	50	9	247	662	676	261	7e-116	414
1641_Transcript_1/2_Confidence_1.000_Length_662_45	662	gi|87141942|gb|DY386553.1|DY386553	708	83.67	447	56	13	219	661	687	254	4e-113	405
1641_Transcript_1/2_Confidence_1.000_Length_662_45	662	gi|87140014|gb|DY384625.1|DY384625	624	88.22	297	31	3	368	662	567	273	6e-97	351
16435_Transcript_1/1_Confidence_1.000_Length_446_45	446	gi|87148397|gb|DY393008.1|DY393008	826	93.75	48	3	0	42	89	241	288	3e-13	73.1
16456_Transcript_1/1_Confidence_1.000_Length_333_45	333	gi|87148230|gb|DY392841.1|DY392841	787	100	39	0	0	1	39	679	717	2e-13	73.1
16456_Transcript_1/1_Confidence_1.000_Length_333_45	333	gi|87148231|gb|DY392842.1|DY392842	863	100	39	0	0	1	39	207	169	2e-13	73.1
16458_Transcript_5/6_Confidence_0.333_Length_692_45	692	gi|87148968|gb|DY393579.1|DY393579	755	99.71	342	1	0	351	692	532	191	9e-180	627
16458_Transcript_5/6_Confidence_0.333_Length_692_45	692	gi|87148969|gb|DY393580.1|DY393580	740	99.71	342	1	0	351	692	209	550	9e-180	627
16458_Transcript_5/6_Confidence_0.333_Length_692_45	692	gi|87143568|gb|DY388179.1|DY388179	730	96.79	343	9	2	351	692	499	158	4e-163	571
16458_Transcript_5/6_Confidence_0.333_Length_692_45	692	gi|87143214|gb|DY387825.1|DY387825	699	90.73	356	18	9	1	352	17	361	1e-129	460
16458_Transcript_5/6_Confidence_0.333_Length_692_45	692	gi|87140389|gb|DY385000.1|DY385000	790	90.45	356	19	9	1	352	34	378	4e-128	455
16458_Transcript_5/6_Confidence_0.333_Length_692_45	692	gi|87141944|gb|DY386555.1|DY386555	763	90.45	356	19	9	1	352	28	372	4e-128	455
16458_Transcript_5/6_Confidence_0.333_Length_692_45	692	gi|87140962|gb|DY385573.1|DY385573	793	90.72	345	18	8	11	352	43	376	8e-126	448
16497_Transcript_1/1_Confidence_1.000_Length_230_45	230	gi|87143269|gb|DY387880.1|DY387880	451	95.42	153	5	2	69	220	5	156	1e-64	243
16497_Transcript_1/1_Confidence_1.000_Length_230_45	230	gi|87143270|gb|DY387881.1|DY387881	554	95.42	153	5	2	69	220	541	390	1e-64	243
16501_Transcript_1/1_Confidence_1.000_Length_1082_45	1082	gi|87143503|gb|DY388114.1|DY388114	758	92.74	413	26	4	219	631	157	565	1e-169	593
1650_Transcript_1/2_Confidence_1.000_Length_554_45	554	gi|87142752|gb|DY387363.1|DY387363	679	93.26	371	17	8	1	368	514	149	1e-153	540
1650_Transcript_1/2_Confidence_1.000_Length_554_45	554	gi|87142750|gb|DY387361.1|DY387361	661	95.19	208	8	2	1	207	455	661	8e-90	327
1656_Transcript_1/1_Confidence_1.000_Length_380_45	380	gi|87139051|gb|DY383662.1|DY383662	624	89.01	182	20	0	1	182	157	338	2e-59	226
1662_Transcript_2/2_Confidence_1.000_Length_500_45	500	gi|87141633|gb|DY386244.1|DY386244	755	96.67	180	6	0	321	500	697	518	2e-81	300
1662_Transcript_2/2_Confidence_1.000_Length_500_45	500	gi|87141634|gb|DY386245.1|DY386245	790	96.67	180	6	0	321	500	334	513	2e-81	300
1662_Transcript_2/2_Confidence_1.000_Length_500_45	500	gi|87141634|gb|DY386245.1|DY386245	790	86.49	185	12	7	131	313	102	275	1e-48	191
16643_Transcript_1/1_Confidence_1.000_Length_1278_45	1278	gi|87146985|gb|DY391596.1|DY391596	800	98.87	798	6	2	1	796	4	800	0	1421
16643_Transcript_1/1_Confidence_1.000_Length_1278_45	1278	gi|87146984|gb|DY391595.1|DY391595	768	99.21	761	5	1	497	1257	768	9	0	1371
16683_Transcript_1/1_Confidence_1.000_Length_243_45	243	gi|87144696|gb|DY389307.1|DY389307	884	93.83	81	4	1	1	81	88	9	6e-28	121
166_Transcript_6/10_Confidence_0.618_Length_1953_45	1953	gi|87146917|gb|DY391528.1|DY391528	844	85.06	174	24	2	652	824	654	826	1e-43	176
166_Transcript_9/10_Confidence_0.676_Length_2217_45	2217	gi|87146917|gb|DY391528.1|DY391528	844	85.06	174	24	2	682	854	654	826	1e-43	176
16723_Transcript_1/1_Confidence_1.000_Length_650_45	650	gi|87144638|gb|DY389249.1|DY389249	756	99.54	648	3	0	1	648	746	99	0	1181
16723_Transcript_1/1_Confidence_1.000_Length_650_45	650	gi|87146814|gb|DY391425.1|DY391425	756	99.54	648	3	0	1	648	11	658	0	1181
16723_Transcript_1/1_Confidence_1.000_Length_650_45	650	gi|87146815|gb|DY391426.1|DY391426	756	99.54	648	3	0	1	648	746	99	0	1181
16723_Transcript_1/1_Confidence_1.000_Length_650_45	650	gi|87144637|gb|DY389248.1|DY389248	766	99.07	648	6	0	1	648	21	668	0	1164
16723_Transcript_1/1_Confidence_1.000_Length_650_45	650	gi|87138752|gb|DY383363.1|DY383363	848	97.22	647	12	4	1	647	697	57	0	1090
16723_Transcript_1/1_Confidence_1.000_Length_650_45	650	gi|87138173|gb|DY382784.1|DY382784	864	96.9	580	12	4	1	580	291	864	0	966
16723_Transcript_1/1_Confidence_1.000_Length_650_45	650	gi|87148481|gb|DY393092.1|DY393092	351	100	207	0	0	441	647	351	145	2e-106	383
16723_Transcript_1/1_Confidence_1.000_Length_650_45	650	gi|87144228|gb|DY388839.1|DY388839	232	100	155	0	0	493	647	213	59	2e-77	287
16723_Transcript_1/1_Confidence_1.000_Length_650_45	650	gi|87144229|gb|DY388840.1|DY388840	220	99.35	153	1	0	495	647	1	153	1e-74	278
16724_Transcript_1/2_Confidence_1.000_Length_607_45	607	gi|87147279|gb|DY391890.1|DY391890	462	90.14	426	10	15	182	607	462	69	3e-149	525
16724_Transcript_1/2_Confidence_1.000_Length_607_45	607	gi|87147280|gb|DY391891.1|DY391891	464	86.7	421	22	18	189	607	9	397	1e-122	436
16735_Transcript_1/5_Confidence_0.385_Length_1001_45	1001	gi|87140959|gb|DY385570.1|DY385570	555	88.51	496	50	5	8	498	62	555	1e-169	593
16735_Transcript_1/5_Confidence_0.385_Length_1001_45	1001	gi|87141036|gb|DY385647.1|DY385647	552	87.84	485	51	6	8	487	482	1	4e-160	562
16735_Transcript_2/5_Confidence_0.462_Length_1172_45	1172	gi|87140959|gb|DY385570.1|DY385570	555	97.58	495	7	3	8	498	62	555	0	843
16735_Transcript_2/5_Confidence_0.462_Length_1172_45	1172	gi|87141036|gb|DY385647.1|DY385647	552	96.49	484	11	4	8	487	482	1	0	795
16741_Transcript_1/2_Confidence_1.000_Length_669_45	669	gi|87148946|gb|DY393557.1|DY393557	679	99.54	655	3	0	15	669	1	655	0	1194
16741_Transcript_1/2_Confidence_1.000_Length_669_45	669	gi|87148947|gb|DY393558.1|DY393558	678	99.08	655	6	0	15	669	670	16	0	1177
16741_Transcript_1/2_Confidence_1.000_Length_669_45	669	gi|87150549|gb|DY395160.1|DY395160	720	99.54	646	3	0	24	669	8	653	0	1177
16741_Transcript_1/2_Confidence_1.000_Length_669_45	669	gi|87150550|gb|DY395161.1|DY395161	699	99.54	646	3	0	24	669	692	47	0	1177
16741_Transcript_1/2_Confidence_1.000_Length_669_45	669	gi|87142627|gb|DY387238.1|DY387238	675	98.61	649	8	1	22	669	4	652	0	1147
16741_Transcript_1/2_Confidence_1.000_Length_669_45	669	gi|87142624|gb|DY387235.1|DY387235	654	98.15	647	11	1	23	669	654	9	0	1127
16741_Transcript_1/2_Confidence_1.000_Length_669_45	669	gi|87143723|gb|DY388334.1|DY388334	658	93.48	629	33	8	39	664	1	624	0	928
16741_Transcript_1/2_Confidence_1.000_Length_669_45	669	gi|87142406|gb|DY387017.1|DY387017	776	93.34	631	35	7	37	664	712	86	0	926
16741_Transcript_1/2_Confidence_1.000_Length_669_45	669	gi|87143724|gb|DY388335.1|DY388335	612	92.82	613	37	7	26	635	609	1	0	881
16741_Transcript_1/2_Confidence_1.000_Length_669_45	669	gi|87142405|gb|DY387016.1|DY387016	804	93.53	371	20	4	37	405	436	804	2e-156	549
16741_Transcript_1/2_Confidence_1.000_Length_669_45	669	gi|87139501|gb|DY384112.1|DY384112	341	92.34	235	14	4	431	664	3	234	8e-91	331
16741_Transcript_1/2_Confidence_1.000_Length_669_45	669	gi|87139502|gb|DY384113.1|DY384113	340	92.54	228	14	3	438	664	332	107	1e-88	324
16741_Transcript_1/2_Confidence_1.000_Length_669_45	669	gi|87139877|gb|DY384488.1|DY384488	354	92.86	224	13	3	442	664	323	102	5e-88	322
16741_Transcript_1/2_Confidence_1.000_Length_669_45	669	gi|87139876|gb|DY384487.1|DY384487	322	93.18	220	12	3	446	664	4	221	2e-87	320
16759_Transcript_2/3_Confidence_0.600_Length_894_45	894	gi|87147493|gb|DY392104.1|DY392104	821	90.28	576	45	11	56	625	61	631	0	743
16759_Transcript_2/3_Confidence_0.600_Length_894_45	894	gi|87147494|gb|DY392105.1|DY392105	743	90.76	476	35	9	155	625	742	271	1e-179	627
16760_Transcript_1/2_Confidence_1.000_Length_718_45	718	gi|87148572|gb|DY393183.1|DY393183	864	84.8	717	72	25	18	711	864	162	0	686
16760_Transcript_1/2_Confidence_1.000_Length_718_45	718	gi|87142480|gb|DY387091.1|DY387091	812	86.78	628	52	19	1	607	651	34	0	671
1678_Transcript_1/1_Confidence_1.000_Length_881_45	881	gi|87147303|gb|DY391914.1|DY391914	497	98.57	488	7	0	221	708	10	497	0	863
1678_Transcript_1/1_Confidence_1.000_Length_881_45	881	gi|87147304|gb|DY391915.1|DY391915	485	98.53	477	7	0	220	696	477	1	0	843
1678_Transcript_1/1_Confidence_1.000_Length_881_45	881	gi|87138930|gb|DY383541.1|DY383541	682	95.08	61	3	0	1	61	579	639	4e-20	97.1
16798_Transcript_1/1_Confidence_1.000_Length_1802_45	1802	gi|87144443|gb|DY389054.1|DY389054	860	98.59	850	7	5	650	1494	10	859	0	1498
16798_Transcript_1/1_Confidence_1.000_Length_1802_45	1802	gi|87147317|gb|DY391928.1|DY391928	830	98.91	824	6	3	678	1500	830	9	0	1469
16798_Transcript_1/1_Confidence_1.000_Length_1802_45	1802	gi|87147316|gb|DY391927.1|DY391927	801	99.13	802	5	2	300	1100	1	801	0	1441
16798_Transcript_1/1_Confidence_1.000_Length_1802_45	1802	gi|87148575|gb|DY393186.1|DY393186	818	98.85	786	8	1	392	1176	33	818	0	1400
16798_Transcript_1/1_Confidence_1.000_Length_1802_45	1802	gi|87148565|gb|DY393176.1|DY393176	771	98.78	739	9	0	392	1130	33	771	0	1315
16798_Transcript_1/1_Confidence_1.000_Length_1802_45	1802	gi|87143188|gb|DY387799.1|DY387799	754	96.42	754	26	1	534	1286	1	754	0	1242
16798_Transcript_1/1_Confidence_1.000_Length_1802_45	1802	gi|87144444|gb|DY389055.1|DY389055	671	99.4	669	3	1	925	1592	671	3	0	1212
16798_Transcript_1/1_Confidence_1.000_Length_1802_45	1802	gi|87143187|gb|DY387798.1|DY387798	753	94.69	754	36	4	547	1297	1	753	0	1168
16798_Transcript_1/1_Confidence_1.000_Length_1802_45	1802	gi|87145808|gb|DY390419.1|DY390419	767	91.47	715	53	8	158	867	56	767	0	976
16798_Transcript_1/1_Confidence_1.000_Length_1802_45	1802	gi|87138520|gb|DY383131.1|DY383131	876	86.82	789	96	8	170	954	90	874	0	874
16798_Transcript_1/1_Confidence_1.000_Length_1802_45	1802	gi|87138521|gb|DY383132.1|DY383132	829	87.74	636	72	6	738	1370	829	197	0	737
16798_Transcript_1/1_Confidence_1.000_Length_1802_45	1802	gi|87141469|gb|DY386080.1|DY386080	722	87.58	628	74	4	170	795	95	720	0	725
16798_Transcript_1/1_Confidence_1.000_Length_1802_45	1802	gi|87138609|gb|DY383220.1|DY383220	831	86.27	648	83	6	314	958	187	831	0	699
16798_Transcript_1/1_Confidence_1.000_Length_1802_45	1802	gi|87138609|gb|DY383220.1|DY383220	831	92.39	92	7	0	170	261	96	187	2e-30	132
16798_Transcript_1/1_Confidence_1.000_Length_1802_45	1802	gi|87148295|gb|DY392906.1|DY392906	781	83.69	742	111	10	182	918	45	781	0	691
16798_Transcript_1/1_Confidence_1.000_Length_1802_45	1802	gi|87145394|gb|DY390005.1|DY390005	780	82.27	784	127	12	209	986	3	780	0	667
16798_Transcript_1/1_Confidence_1.000_Length_1802_45	1802	gi|87139248|gb|DY383859.1|DY383859	706	82.36	652	105	9	179	825	59	705	9e-159	558
16798_Transcript_1/1_Confidence_1.000_Length_1802_45	1802	gi|87146007|gb|DY390618.1|DY390618	375	90.31	196	19	0	1184	1379	1	196	4e-68	257
16798_Transcript_1/1_Confidence_1.000_Length_1802_45	1802	gi|87146008|gb|DY390619.1|DY390619	404	90.31	196	19	0	1184	1379	372	177	4e-68	257
16798_Transcript_1/1_Confidence_1.000_Length_1802_45	1802	gi|87146004|gb|DY390615.1|DY390615	712	93.85	65	4	0	170	234	648	712	2e-20	99
16798_Transcript_1/1_Confidence_1.000_Length_1802_45	1802	gi|87141078|gb|DY385689.1|DY385689	777	100	29	0	0	179	207	747	775	5e-07	54.7
16807_Transcript_7/9_Confidence_0.542_Length_2340_45	2340	gi|87145345|gb|DY389956.1|DY389956	750	84.15	738	106	10	1466	2197	750	18	0	704
16807_Transcript_7/9_Confidence_0.542_Length_2340_45	2340	gi|87145344|gb|DY389955.1|DY389955	802	85.05	495	68	6	548	1039	309	800	7e-141	499
16807_Transcript_7/9_Confidence_0.542_Length_2340_45	2340	gi|87138130|gb|DY382741.1|DY382741	647	80.31	579	93	18	1582	2148	645	76	2e-116	418
16811_Transcript_1/3_Confidence_0.571_Length_569_45	569	gi|87146942|gb|DY391553.1|DY391553	803	99.56	226	1	0	310	535	226	1	2e-115	412
16811_Transcript_1/3_Confidence_0.571_Length_569_45	569	gi|87146942|gb|DY391553.1|DY391553	803	98.21	223	4	0	1	223	448	226	1e-108	390
16811_Transcript_1/3_Confidence_0.571_Length_569_45	569	gi|87145680|gb|DY390291.1|DY390291	656	98.21	223	4	0	1	223	423	201	1e-108	390
16811_Transcript_1/3_Confidence_0.571_Length_569_45	569	gi|87145680|gb|DY390291.1|DY390291	656	90.1	202	18	2	310	510	201	1	9e-70	261
16811_Transcript_2/3_Confidence_0.714_Length_667_45	667	gi|87146942|gb|DY391553.1|DY391553	803	99.26	406	3	0	228	633	406	1	0	734
16811_Transcript_2/3_Confidence_0.714_Length_667_45	667	gi|87146942|gb|DY391553.1|DY391553	803	100	73	0	0	1	73	477	405	6e-32	135
16811_Transcript_2/3_Confidence_0.714_Length_667_45	667	gi|87145680|gb|DY390291.1|DY390291	656	94.24	382	20	2	228	608	381	1	2e-166	582
16811_Transcript_2/3_Confidence_0.714_Length_667_45	667	gi|87145680|gb|DY390291.1|DY390291	656	100	73	0	0	1	73	452	380	6e-32	135
16816_Transcript_4/5_Confidence_0.308_Length_1422_45	1422	gi|87143643|gb|DY388254.1|DY388254	500	83.33	342	29	12	403	740	500	183	3e-78	291
16816_Transcript_5/5_Confidence_0.538_Length_1728_45	1728	gi|87143643|gb|DY388254.1|DY388254	500	86.48	525	38	16	403	919	500	1	7e-155	545
16835_Transcript_2/2_Confidence_1.000_Length_1114_45	1114	gi|87147201|gb|DY391812.1|DY391812	654	87.25	306	37	2	616	920	639	335	1e-95	348
16843_Transcript_3/3_Confidence_0.600_Length_1137_45	1137	gi|87138611|gb|DY383222.1|DY383222	736	93.76	737	38	7	21	751	1	735	0	1099
16843_Transcript_3/3_Confidence_0.600_Length_1137_45	1137	gi|87138434|gb|DY383045.1|DY383045	652	89.57	671	36	16	448	1112	4	646	0	821
16843_Transcript_3/3_Confidence_0.600_Length_1137_45	1137	gi|87138435|gb|DY383046.1|DY383046	654	92.43	568	32	8	447	1008	646	84	0	800
16843_Transcript_3/3_Confidence_0.600_Length_1137_45	1137	gi|87143157|gb|DY387768.1|DY387768	401	92.13	394	21	9	737	1126	401	14	1e-155	547
16843_Transcript_3/3_Confidence_0.600_Length_1137_45	1137	gi|87143612|gb|DY388223.1|DY388223	400	91.88	394	22	9	737	1126	400	13	6e-154	542
16843_Transcript_3/3_Confidence_0.600_Length_1137_45	1137	gi|87143106|gb|DY387717.1|DY387717	394	91.24	388	23	10	743	1126	2	382	9e-147	518
16843_Transcript_3/3_Confidence_0.600_Length_1137_45	1137	gi|87143543|gb|DY388154.1|DY388154	399	90.36	394	27	10	737	1126	1	387	2e-143	507
16852_Transcript_1/2_Confidence_1.000_Length_1527_45	1527	gi|87150167|gb|DY394778.1|DY394778	787	99.87	781	1	0	15	795	7	787	0	1437
16852_Transcript_1/2_Confidence_1.000_Length_1527_45	1527	gi|87150168|gb|DY394779.1|DY394779	719	98.47	721	8	3	788	1507	719	1	0	1267
16852_Transcript_1/2_Confidence_1.000_Length_1527_45	1527	gi|87144001|gb|DY388612.1|DY388612	809	95.35	752	30	5	643	1392	809	61	0	1190
1687_Transcript_4/4_Confidence_0.571_Length_635_45	635	gi|87146189|gb|DY390800.1|DY390800	369	99.1	332	3	0	175	506	8	339	6e-171	597
1687_Transcript_4/4_Confidence_0.571_Length_635_45	635	gi|87150570|gb|DY395181.1|DY395181	563	86.41	515	51	18	45	551	51	554	2e-155	545
1687_Transcript_4/4_Confidence_0.571_Length_635_45	635	gi|87150571|gb|DY395182.1|DY395182	595	92.2	372	29	0	45	416	513	142	9e-150	527
16885_Transcript_1/4_Confidence_0.625_Length_659_45	659	gi|87138499|gb|DY383110.1|DY383110	539	99.58	478	2	0	76	553	535	58	0	872
16885_Transcript_1/4_Confidence_0.625_Length_659_45	659	gi|87138499|gb|DY383110.1|DY383110	539	100	44	0	0	616	659	244	201	8e-16	82.4
16885_Transcript_1/4_Confidence_0.625_Length_659_45	659	gi|87138586|gb|DY383197.1|DY383197	527	99.79	469	1	0	85	553	1	469	0	861
16885_Transcript_1/4_Confidence_0.625_Length_659_45	659	gi|87138586|gb|DY383197.1|DY383197	527	100	44	0	0	616	659	283	326	8e-16	82.4
16885_Transcript_1/4_Confidence_0.625_Length_659_45	659	gi|87144841|gb|DY389452.1|DY389452	856	98.94	379	4	0	175	553	182	560	0	678
16885_Transcript_1/4_Confidence_0.625_Length_659_45	659	gi|87144841|gb|DY389452.1|DY389452	856	96.21	132	5	0	1	132	35	166	2e-56	217
16885_Transcript_1/4_Confidence_0.625_Length_659_45	659	gi|87144841|gb|DY389452.1|DY389452	856	100	44	0	0	616	659	374	417	8e-16	82.4
16885_Transcript_1/4_Confidence_0.625_Length_659_45	659	gi|87144840|gb|DY389451.1|DY389451	840	98.94	377	4	0	177	553	840	464	0	675
16885_Transcript_1/4_Confidence_0.625_Length_659_45	659	gi|87144840|gb|DY389451.1|DY389451	840	100	44	0	0	616	659	650	607	8e-16	82.4
16885_Transcript_1/4_Confidence_0.625_Length_659_45	659	gi|87141348|gb|DY385959.1|DY385959	783	97.36	379	10	0	175	553	259	637	0	645
16885_Transcript_1/4_Confidence_0.625_Length_659_45	659	gi|87141348|gb|DY385959.1|DY385959	783	100	44	0	0	616	659	451	494	8e-16	82.4
16885_Transcript_1/4_Confidence_0.625_Length_659_45	659	gi|87140309|gb|DY384920.1|DY384920	714	95.53	380	16	1	175	553	175	554	1e-173	606
16885_Transcript_1/4_Confidence_0.625_Length_659_45	659	gi|87140309|gb|DY384920.1|DY384920	714	92.42	132	10	0	1	132	28	159	5e-48	189
16885_Transcript_1/4_Confidence_0.625_Length_659_45	659	gi|87140309|gb|DY384920.1|DY384920	714	97.73	44	1	0	616	659	368	411	4e-14	76.8
16885_Transcript_1/4_Confidence_0.625_Length_659_45	659	gi|87145058|gb|DY389669.1|DY389669	647	86.68	548	42	15	5	550	87	605	2e-165	579
16885_Transcript_1/4_Confidence_0.625_Length_659_45	659	gi|87145058|gb|DY389669.1|DY389669	647	100	44	0	0	616	659	422	465	8e-16	82.4
16885_Transcript_1/4_Confidence_0.625_Length_659_45	659	gi|87139915|gb|DY384526.1|DY384526	712	92.47	372	24	4	184	553	137	506	2e-150	529
16892_Transcript_1/1_Confidence_1.000_Length_651_45	651	gi|87143700|gb|DY388311.1|DY388311	603	90.05	211	18	1	444	651	603	393	2e-72	270
16892_Transcript_1/1_Confidence_1.000_Length_651_45	651	gi|87143639|gb|DY388250.1|DY388250	628	89.71	204	18	1	451	651	1	204	1e-68	257
16899_Transcript_2/3_Confidence_0.714_Length_612_45	612	gi|87149532|gb|DY394143.1|DY394143	618	98.28	58	1	0	1	58	553	610	6e-22	102
16899_Transcript_2/3_Confidence_0.714_Length_612_45	612	gi|87149531|gb|DY394142.1|DY394142	605	100	36	0	0	1	36	37	2	2e-11	67.6
16924_Transcript_2/6_Confidence_0.529_Length_1948_45	1948	gi|87144489|gb|DY389100.1|DY389100	681	96.29	674	7	10	1271	1940	660	1	0	1090
16924_Transcript_2/6_Confidence_0.529_Length_1948_45	1948	gi|87144489|gb|DY389100.1|DY389100	681	87.26	314	32	8	825	1133	681	371	2e-96	351
16924_Transcript_2/6_Confidence_0.529_Length_1948_45	1948	gi|87149336|gb|DY393947.1|DY393947	768	99.6	499	2	0	1	499	270	768	0	911
16930_Transcript_2/3_Confidence_0.500_Length_818_45	818	gi|87142729|gb|DY387340.1|DY387340	692	92.78	291	14	5	1	291	72	355	9e-116	414
16930_Transcript_2/3_Confidence_0.500_Length_818_45	818	gi|87142728|gb|DY387339.1|DY387339	641	90.56	180	12	3	113	291	641	466	3e-61	233
16939_Transcript_1/3_Confidence_0.222_Length_1235_45	1235	gi|87141601|gb|DY386212.1|DY386212	726	92.55	188	14	0	3	190	557	370	3e-72	270
16939_Transcript_1/3_Confidence_0.222_Length_1235_45	1235	gi|87141602|gb|DY386213.1|DY386213	822	92.55	188	14	0	3	190	327	514	3e-72	270
16939_Transcript_1/3_Confidence_0.222_Length_1235_45	1235	gi|87144050|gb|DY388661.1|DY388661	722	88.6	193	16	6	1	190	443	254	5e-60	230
16939_Transcript_1/3_Confidence_0.222_Length_1235_45	1235	gi|87144405|gb|DY389016.1|DY389016	759	88.6	193	16	6	1	190	446	257	5e-60	230
16939_Transcript_1/3_Confidence_0.222_Length_1235_45	1235	gi|87144406|gb|DY389017.1|DY389017	667	88.6	193	16	6	1	190	320	509	5e-60	230
16939_Transcript_1/3_Confidence_0.222_Length_1235_45	1235	gi|87144051|gb|DY388662.1|DY388662	523	87.56	193	18	6	1	190	179	368	1e-56	219
16939_Transcript_1/3_Confidence_0.222_Length_1235_45	1235	gi|87141094|gb|DY385705.1|DY385705	367	98.86	88	1	0	1	88	272	359	3e-38	158
16939_Transcript_1/3_Confidence_0.222_Length_1235_45	1235	gi|87141096|gb|DY385707.1|DY385707	367	98.86	88	1	0	1	88	272	359	3e-38	158
16939_Transcript_1/3_Confidence_0.222_Length_1235_45	1235	gi|87141095|gb|DY385706.1|DY385706	367	98.84	86	1	0	1	86	96	11	3e-37	154
16939_Transcript_1/3_Confidence_0.222_Length_1235_45	1235	gi|87141093|gb|DY385704.1|DY385704	366	98.82	85	1	0	1	85	95	11	1e-36	152
16939_Transcript_2/3_Confidence_0.556_Length_596_45	596	gi|87141601|gb|DY386212.1|DY386212	726	95.8	548	23	0	3	550	557	10	0	885
16939_Transcript_2/3_Confidence_0.556_Length_596_45	596	gi|87141602|gb|DY386213.1|DY386213	822	95.16	496	24	0	3	498	327	822	0	784
16939_Transcript_2/3_Confidence_0.556_Length_596_45	596	gi|87144050|gb|DY388661.1|DY388661	722	86.8	394	44	8	1	390	443	54	2e-121	433
16939_Transcript_2/3_Confidence_0.556_Length_596_45	596	gi|87144405|gb|DY389016.1|DY389016	759	86.8	394	44	8	1	390	446	57	2e-121	433
16939_Transcript_2/3_Confidence_0.556_Length_596_45	596	gi|87144406|gb|DY389017.1|DY389017	667	86.61	351	39	8	1	347	320	666	7e-106	381
16939_Transcript_2/3_Confidence_0.556_Length_596_45	596	gi|87144051|gb|DY388662.1|DY388662	523	85.96	349	41	8	1	345	179	523	2e-101	366
16939_Transcript_2/3_Confidence_0.556_Length_596_45	596	gi|87141094|gb|DY385705.1|DY385705	367	98.86	88	1	0	1	88	272	359	1e-38	158
16939_Transcript_2/3_Confidence_0.556_Length_596_45	596	gi|87141096|gb|DY385707.1|DY385707	367	98.86	88	1	0	1	88	272	359	1e-38	158
16939_Transcript_2/3_Confidence_0.556_Length_596_45	596	gi|87141095|gb|DY385706.1|DY385706	367	98.84	86	1	0	1	86	96	11	2e-37	154
16939_Transcript_2/3_Confidence_0.556_Length_596_45	596	gi|87141093|gb|DY385704.1|DY385704	366	98.82	85	1	0	1	85	95	11	6e-37	152
16950_Transcript_2/5_Confidence_0.750_Length_1247_45	1247	gi|87149813|gb|DY394424.1|DY394424	732	88.36	524	45	12	59	572	24	541	4e-176	616
16950_Transcript_4/5_Confidence_0.625_Length_1138_45	1138	gi|87149813|gb|DY394424.1|DY394424	732	88.6	719	59	17	59	764	24	732	0	852
16950_Transcript_4/5_Confidence_0.625_Length_1138_45	1138	gi|87147085|gb|DY391696.1|DY391696	729	79.08	674	98	35	205	852	48	704	2e-118	424
16950_Transcript_4/5_Confidence_0.625_Length_1138_45	1138	gi|87149054|gb|DY393665.1|DY393665	834	79.08	674	98	35	205	852	143	799	2e-118	424
16950_Transcript_4/5_Confidence_0.625_Length_1138_45	1138	gi|87147086|gb|DY391697.1|DY391697	857	78.52	717	101	44	237	922	857	163	8e-118	422
16950_Transcript_4/5_Confidence_0.625_Length_1138_45	1138	gi|87143948|gb|DY388559.1|DY388559	728	78.56	695	98	45	258	922	725	52	2e-114	411
16950_Transcript_4/5_Confidence_0.625_Length_1138_45	1138	gi|87143949|gb|DY388560.1|DY388560	750	79.04	644	91	36	205	821	124	750	1e-111	401
16963_Transcript_1/1_Confidence_1.000_Length_1609_45	1609	gi|87141166|gb|DY385777.1|DY385777	812	95.09	631	27	4	938	1566	812	184	0	990
16988_Transcript_1/2_Confidence_1.000_Length_554_45	554	gi|87140864|gb|DY385475.1|DY385475	283	85.71	140	11	8	267	403	276	143	4e-33	139
1703_Transcript_1/2_Confidence_1.000_Length_2648_45	2648	gi|87138367|gb|DY382978.1|DY382978	812	86.62	807	72	21	1379	2153	10	812	0	859
1703_Transcript_1/2_Confidence_1.000_Length_2648_45	2648	gi|87138368|gb|DY382979.1|DY382979	672	88.6	342	27	11	1949	2282	661	324	2e-112	405
17061_Transcript_1/2_Confidence_1.000_Length_3069_45	3069	gi|87149994|gb|DY394605.1|DY394605	859	99.42	859	5	0	1621	2479	1	859	0	1559
17061_Transcript_1/2_Confidence_1.000_Length_3069_45	3069	gi|87149993|gb|DY394604.1|DY394604	781	99.73	738	2	0	2332	3069	781	44	0	1352
1706_Transcript_3/7_Confidence_0.611_Length_2111_45	2111	gi|87145549|gb|DY390160.1|DY390160	747	84.77	243	31	6	866	1105	513	274	2e-62	239
17084_Transcript_1/4_Confidence_0.133_Length_547_45	547	gi|87150152|gb|DY394763.1|DY394763	823	99.13	461	1	3	1	460	461	3	0	826
17084_Transcript_1/4_Confidence_0.133_Length_547_45	547	gi|87150152|gb|DY394763.1|DY394763	823	90.57	265	19	6	1	262	689	428	2e-95	346
17084_Transcript_1/4_Confidence_0.133_Length_547_45	547	gi|87146823|gb|DY391434.1|DY391434	881	98.77	408	3	1	1	406	474	881	0	725
17084_Transcript_1/4_Confidence_0.133_Length_547_45	547	gi|87146823|gb|DY391434.1|DY391434	881	90.91	264	20	4	1	262	246	507	5e-97	351
17084_Transcript_1/4_Confidence_0.133_Length_547_45	547	gi|87140666|gb|DY385277.1|DY385277	799	91.2	534	31	11	1	529	535	13	0	712
17084_Transcript_1/4_Confidence_0.133_Length_547_45	547	gi|87140630|gb|DY385241.1|DY385241	775	90.67	536	31	14	1	529	536	13	0	695
17084_Transcript_1/4_Confidence_0.133_Length_547_45	547	gi|87150151|gb|DY394762.1|DY394762	797	99.47	377	0	2	1	376	422	797	0	684
17084_Transcript_1/4_Confidence_0.133_Length_547_45	547	gi|87150151|gb|DY394762.1|DY394762	797	90.57	265	19	6	1	262	194	455	2e-95	346
17084_Transcript_1/4_Confidence_0.133_Length_547_45	547	gi|87142896|gb|DY387507.1|DY387507	608	92.68	451	25	7	1	447	461	15	0	643
17084_Transcript_1/4_Confidence_0.133_Length_547_45	547	gi|87142895|gb|DY387506.1|DY387506	838	94.05	420	19	6	1	416	408	825	0	632
17084_Transcript_1/4_Confidence_0.133_Length_547_45	547	gi|87144244|gb|DY388855.1|DY388855	572	86.06	459	50	12	1	448	509	54	6e-136	481
17084_Transcript_1/4_Confidence_0.133_Length_547_45	547	gi|87144243|gb|DY388854.1|DY388854	808	95.33	300	11	3	1	299	511	808	1e-133	473
17084_Transcript_1/4_Confidence_0.133_Length_547_45	547	gi|87149134|gb|DY393745.1|DY393745	905	88.54	288	31	2	1	287	473	759	6e-96	348
17084_Transcript_1/4_Confidence_0.133_Length_547_45	547	gi|87149134|gb|DY393745.1|DY393745	905	82.13	263	39	8	1	259	17	275	5e-57	219
17084_Transcript_1/4_Confidence_0.133_Length_547_45	547	gi|87149135|gb|DY393746.1|DY393746	821	88.54	288	31	2	1	287	510	224	6e-96	348
17084_Transcript_1/4_Confidence_0.133_Length_547_45	547	gi|87149135|gb|DY393746.1|DY393746	821	86.49	111	13	2	150	259	817	708	1e-27	121
17084_Transcript_1/4_Confidence_0.133_Length_547_45	547	gi|87140661|gb|DY385272.1|DY385272	834	88.19	288	32	2	1	287	656	370	3e-94	342
17084_Transcript_1/4_Confidence_0.133_Length_547_45	547	gi|87146801|gb|DY391412.1|DY391412	791	87.72	285	35	0	3	287	500	216	2e-91	333
17084_Transcript_1/4_Confidence_0.133_Length_547_45	547	gi|87148289|gb|DY392900.1|DY392900	805	87.72	285	35	0	3	287	490	206	2e-91	333
17084_Transcript_1/4_Confidence_0.133_Length_547_45	547	gi|87141026|gb|DY385637.1|DY385637	397	83.99	356	44	12	99	444	356	4	2e-90	329
17084_Transcript_1/4_Confidence_0.133_Length_547_45	547	gi|87138477|gb|DY383088.1|DY383088	800	87.15	288	35	2	1	287	504	218	3e-89	326
17084_Transcript_1/4_Confidence_0.133_Length_547_45	547	gi|87146064|gb|DY390675.1|DY390675	639	87.15	288	35	2	1	287	84	370	3e-89	326
17084_Transcript_1/4_Confidence_0.133_Length_547_45	547	gi|87147055|gb|DY391666.1|DY391666	739	87.15	288	35	2	1	287	440	154	3e-89	326
17084_Transcript_1/4_Confidence_0.133_Length_547_45	547	gi|87149435|gb|DY394046.1|DY394046	689	87.37	285	35	1	3	287	438	155	3e-89	326
17084_Transcript_1/4_Confidence_0.133_Length_547_45	547	gi|87149436|gb|DY394047.1|DY394047	686	87.37	285	35	1	3	287	249	532	3e-89	326
17084_Transcript_1/4_Confidence_0.133_Length_547_45	547	gi|87141389|gb|DY386000.1|DY386000	507	86.76	287	38	0	1	287	54	340	1e-87	320
17084_Transcript_1/4_Confidence_0.133_Length_547_45	547	gi|87142774|gb|DY387385.1|DY387385	760	86.81	288	36	2	1	287	248	534	1e-87	320
17084_Transcript_1/4_Confidence_0.133_Length_547_45	547	gi|87142775|gb|DY387386.1|DY387386	677	86.81	288	36	2	1	287	496	210	1e-87	320
17084_Transcript_1/4_Confidence_0.133_Length_547_45	547	gi|87145944|gb|DY390555.1|DY390555	761	86.76	287	38	0	1	287	454	168	1e-87	320
17084_Transcript_1/4_Confidence_0.133_Length_547_45	547	gi|87139826|gb|DY384437.1|DY384437	723	86.46	288	37	2	1	287	459	173	6e-86	315
17084_Transcript_1/4_Confidence_0.133_Length_547_45	547	gi|87140470|gb|DY385081.1|DY385081	651	86.46	288	37	2	1	287	296	582	6e-86	315
17084_Transcript_1/4_Confidence_0.133_Length_547_45	547	gi|87140471|gb|DY385082.1|DY385082	747	86.46	288	37	2	1	287	446	160	6e-86	315
17084_Transcript_1/4_Confidence_0.133_Length_547_45	547	gi|87142385|gb|DY386996.1|DY386996	816	86.46	288	37	2	1	287	369	655	6e-86	315
17084_Transcript_1/4_Confidence_0.133_Length_547_45	547	gi|87142386|gb|DY386997.1|DY386997	778	86.46	288	37	2	1	287	446	160	6e-86	315
17084_Transcript_1/4_Confidence_0.133_Length_547_45	547	gi|87150590|gb|DY395201.1|DY395201	760	86.36	286	38	1	3	287	483	198	8e-85	311
17084_Transcript_1/4_Confidence_0.133_Length_547_45	547	gi|87143201|gb|DY387812.1|DY387812	588	86.06	287	38	2	1	287	508	224	1e-83	307
17084_Transcript_1/4_Confidence_0.133_Length_547_45	547	gi|87139156|gb|DY383767.1|DY383767	750	85.76	288	39	2	1	287	557	271	1e-82	303
17084_Transcript_1/4_Confidence_0.133_Length_547_45	547	gi|87141600|gb|DY386211.1|DY386211	823	85.76	288	39	2	1	287	517	231	1e-82	303
17084_Transcript_1/4_Confidence_0.133_Length_547_45	547	gi|87146519|gb|DY391130.1|DY391130	670	85.76	288	39	2	1	287	218	504	1e-82	303
17084_Transcript_1/4_Confidence_0.133_Length_547_45	547	gi|87149047|gb|DY393658.1|DY393658	828	85.76	288	39	2	1	287	597	311	1e-82	303
17084_Transcript_1/4_Confidence_0.133_Length_547_45	547	gi|87149408|gb|DY394019.1|DY394019	735	85.76	288	39	2	1	287	488	202	1e-82	303
17084_Transcript_1/4_Confidence_0.133_Length_547_45	547	gi|87138751|gb|DY383362.1|DY383362	691	85.42	288	40	2	1	287	501	215	6e-81	298
17084_Transcript_1/4_Confidence_0.133_Length_547_45	547	gi|87138756|gb|DY383367.1|DY383367	694	85.42	288	40	2	1	287	195	481	6e-81	298
17084_Transcript_1/4_Confidence_0.133_Length_547_45	547	gi|87138938|gb|DY383549.1|DY383549	812	85.42	288	40	2	1	287	615	329	6e-81	298
17084_Transcript_1/4_Confidence_0.133_Length_547_45	547	gi|87140474|gb|DY385085.1|DY385085	651	85.42	288	40	2	1	287	252	538	6e-81	298
17084_Transcript_1/4_Confidence_0.133_Length_547_45	547	gi|87140475|gb|DY385086.1|DY385086	761	85.42	288	40	2	1	287	502	216	6e-81	298
17084_Transcript_1/4_Confidence_0.133_Length_547_45	547	gi|87140713|gb|DY385324.1|DY385324	808	85.42	288	40	2	1	287	394	108	6e-81	298
17084_Transcript_1/4_Confidence_0.133_Length_547_45	547	gi|87145179|gb|DY389790.1|DY389790	868	85.42	288	40	2	1	287	502	216	6e-81	298
17084_Transcript_1/4_Confidence_0.133_Length_547_45	547	gi|87145582|gb|DY390193.1|DY390193	655	85.42	288	40	2	1	287	530	244	6e-81	298
17084_Transcript_1/4_Confidence_0.133_Length_547_45	547	gi|87145583|gb|DY390194.1|DY390194	632	85.42	288	40	2	1	287	103	389	6e-81	298
17084_Transcript_1/4_Confidence_0.133_Length_547_45	547	gi|87146518|gb|DY391129.1|DY391129	535	85.42	288	40	2	1	287	453	167	6e-81	298
17084_Transcript_1/4_Confidence_0.133_Length_547_45	547	gi|87147291|gb|DY391902.1|DY391902	744	85.42	288	40	2	1	287	490	204	6e-81	298
17084_Transcript_1/4_Confidence_0.133_Length_547_45	547	gi|87147292|gb|DY391903.1|DY391903	726	85.42	288	40	2	1	287	238	524	6e-81	298
17084_Transcript_1/4_Confidence_0.133_Length_547_45	547	gi|87148655|gb|DY393266.1|DY393266	811	85.42	288	40	2	1	287	487	201	6e-81	298
17084_Transcript_1/4_Confidence_0.133_Length_547_45	547	gi|87149909|gb|DY394520.1|DY394520	807	85.42	288	40	2	1	287	365	79	6e-81	298
17084_Transcript_1/4_Confidence_0.133_Length_547_45	547	gi|87139394|gb|DY384005.1|DY384005	653	85.12	289	39	4	1	287	566	280	3e-79	292
17084_Transcript_1/4_Confidence_0.133_Length_547_45	547	gi|87145305|gb|DY389916.1|DY389916	426	85.07	288	41	2	1	287	417	131	3e-79	292
17084_Transcript_1/4_Confidence_0.133_Length_547_45	547	gi|87149346|gb|DY393957.1|DY393957	792	84.72	288	42	2	1	287	502	216	1e-77	287
17084_Transcript_1/4_Confidence_0.133_Length_547_45	547	gi|87142817|gb|DY387428.1|DY387428	510	83.8	284	36	9	1	279	232	510	8e-70	261
17084_Transcript_1/4_Confidence_0.133_Length_547_45	547	gi|87142814|gb|DY387425.1|DY387425	644	82.75	284	39	10	1	279	423	145	8e-65	244
17084_Transcript_1/4_Confidence_0.133_Length_547_45	547	gi|87145943|gb|DY390554.1|DY390554	688	87.2	211	27	0	1	211	476	686	1e-63	241
17084_Transcript_1/4_Confidence_0.133_Length_547_45	547	gi|87142966|gb|DY387577.1|DY387577	600	81.75	285	44	8	1	281	222	502	6e-61	231
1708_Transcript_3/4_Confidence_0.444_Length_2427_45	2427	gi|87149426|gb|DY394037.1|DY394037	736	87.06	286	33	4	2141	2424	217	500	6e-87	320
1708_Transcript_3/4_Confidence_0.444_Length_2427_45	2427	gi|87149427|gb|DY394038.1|DY394038	855	87.06	286	33	4	2141	2424	689	406	6e-87	320
1711_Transcript_4/4_Confidence_0.636_Length_3100_45	3100	gi|87143509|gb|DY388120.1|DY388120	935	86.63	763	81	18	227	982	751	3	0	824
1711_Transcript_4/4_Confidence_0.636_Length_3100_45	3100	gi|87143508|gb|DY388119.1|DY388119	737	84.39	506	63	13	220	721	243	736	9e-136	483
17158_Transcript_1/3_Confidence_0.625_Length_1019_45	1019	gi|87149071|gb|DY393682.1|DY393682	843	98.12	853	6	7	110	962	1	843	0	1478
17158_Transcript_1/3_Confidence_0.625_Length_1019_45	1019	gi|87144141|gb|DY388752.1|DY388752	809	97.92	816	6	8	91	905	4	809	0	1402
17158_Transcript_1/3_Confidence_0.625_Length_1019_45	1019	gi|87144142|gb|DY388753.1|DY388753	770	97.55	776	9	2	209	984	770	5	0	1319
17158_Transcript_1/3_Confidence_0.625_Length_1019_45	1019	gi|87149070|gb|DY393681.1|DY393681	750	97.5	761	7	5	206	965	750	1	0	1290
17161_Transcript_1/4_Confidence_0.625_Length_852_45	852	gi|87138126|gb|DY382737.1|DY382737	583	93.41	91	6	0	595	685	481	571	8e-32	135
1717_Transcript_1/3_Confidence_0.667_Length_771_45	771	gi|87138970|gb|DY383581.1|DY383581	669	94.1	322	16	3	326	646	598	279	2e-137	486
1717_Transcript_1/3_Confidence_0.667_Length_771_45	771	gi|87138970|gb|DY383581.1|DY383581	669	100	44	0	0	728	771	279	236	1e-15	82.4
1717_Transcript_2/3_Confidence_0.667_Length_849_45	849	gi|87138970|gb|DY383581.1|DY383581	669	93.86	277	15	2	449	724	554	279	3e-116	416
1717_Transcript_2/3_Confidence_0.667_Length_849_45	849	gi|87138970|gb|DY383581.1|DY383581	669	95.74	47	1	1	326	372	598	553	2e-13	75
1717_Transcript_2/3_Confidence_0.667_Length_849_45	849	gi|87138970|gb|DY383581.1|DY383581	669	97.56	41	1	0	809	849	276	236	2e-12	71.3
17181_Transcript_1/1_Confidence_1.000_Length_229_45	229	gi|87142027|gb|DY386638.1|DY386638	799	95.05	182	9	0	3	184	185	4	5e-78	287
17187_Transcript_1/1_Confidence_1.000_Length_1296_45	1296	gi|87142100|gb|DY386711.1|DY386711	800	92.22	90	4	3	1	88	746	658	3e-28	124
17187_Transcript_1/1_Confidence_1.000_Length_1296_45	1296	gi|87142100|gb|DY386711.1|DY386711	800	98.44	64	1	0	92	155	516	453	6e-25	113
17187_Transcript_1/1_Confidence_1.000_Length_1296_45	1296	gi|87142176|gb|DY386787.1|DY386787	645	92.73	55	4	0	98	152	234	288	6e-15	80.5
17198_Transcript_1/1_Confidence_1.000_Length_2287_45	2287	gi|87138887|gb|DY383498.1|DY383498	449	95.63	252	11	0	196	447	198	449	2e-112	405
17198_Transcript_1/1_Confidence_1.000_Length_2287_45	2287	gi|87139065|gb|DY383676.1|DY383676	449	95.63	252	11	0	196	447	198	449	2e-112	405
17198_Transcript_1/1_Confidence_1.000_Length_2287_45	2287	gi|87138888|gb|DY383499.1|DY383499	439	95.44	241	10	1	196	436	242	3	7e-106	383
17198_Transcript_1/1_Confidence_1.000_Length_2287_45	2287	gi|87139066|gb|DY383677.1|DY383677	431	94.44	234	13	0	196	429	234	1	3e-99	361
17259_Transcript_2/3_Confidence_0.500_Length_624_45	624	gi|87141410|gb|DY386021.1|DY386021	642	89.79	480	23	13	113	583	468	6	3e-169	592
17259_Transcript_2/3_Confidence_0.500_Length_624_45	624	gi|87147890|gb|DY392501.1|DY392501	677	91.13	293	25	1	274	565	168	460	2e-110	396
1729_Transcript_8/9_Confidence_0.630_Length_3246_45	3246	gi|87140707|gb|DY385318.1|DY385318	702	81.31	717	54	46	30	709	699	26	2e-143	508
1729_Transcript_8/9_Confidence_0.630_Length_3246_45	3246	gi|87140743|gb|DY385354.1|DY385354	702	81.31	717	54	46	30	709	698	25	2e-143	508
1729_Transcript_8/9_Confidence_0.630_Length_3246_45	3246	gi|87139384|gb|DY383995.1|DY383995	633	78.06	155	17	15	1980	2128	7	150	4e-15	82.4
1729_Transcript_8/9_Confidence_0.630_Length_3246_45	3246	gi|87139384|gb|DY383995.1|DY383995	633	97.67	43	1	0	2086	2128	181	223	7e-13	75
1729_Transcript_8/9_Confidence_0.630_Length_3246_45	3246	gi|87139384|gb|DY383995.1|DY383995	633	100	37	0	0	2220	2256	267	303	3e-11	69.4
17306_Transcript_2/2_Confidence_1.000_Length_929_45	929	gi|87143764|gb|DY388375.1|DY388375	760	94.95	733	31	5	200	929	760	31	0	1144
17306_Transcript_2/2_Confidence_1.000_Length_929_45	929	gi|87143761|gb|DY388372.1|DY388372	778	99.02	305	3	0	192	496	474	778	1e-155	547
17313_Transcript_1/4_Confidence_0.600_Length_1397_45	1397	gi|87150506|gb|DY395117.1|DY395117	865	91.45	234	20	0	447	680	540	307	1e-87	322
17313_Transcript_2/4_Confidence_0.700_Length_1394_45	1394	gi|87150506|gb|DY395117.1|DY395117	865	84.44	257	17	13	421	677	540	307	2e-60	231
17315_Transcript_2/3_Confidence_0.429_Length_361_45	361	gi|87142975|gb|DY387586.1|DY387586	464	94.52	146	8	0	216	361	179	324	2e-59	226
17342_Transcript_3/3_Confidence_0.667_Length_1091_45	1091	gi|87146808|gb|DY391419.1|DY391419	795	87.32	213	23	4	757	967	415	205	2e-63	241
17386_Transcript_1/2_Confidence_1.000_Length_1112_45	1112	gi|87140568|gb|DY385179.1|DY385179	925	88.81	733	78	4	213	943	733	3	0	896
17387_Transcript_1/3_Confidence_0.714_Length_1564_45	1564	gi|87139525|gb|DY384136.1|DY384136	637	94.78	230	10	2	1309	1536	190	419	3e-98	357
17387_Transcript_1/3_Confidence_0.714_Length_1564_45	1564	gi|87139526|gb|DY384137.1|DY384137	667	94.78	230	10	2	1309	1536	446	217	3e-98	357
17518_Transcript_3/3_Confidence_0.500_Length_324_45	324	gi|87149281|gb|DY393892.1|DY393892	521	100	44	0	0	1	44	188	231	4e-16	82.4
17534_Transcript_2/2_Confidence_1.000_Length_1539_45	1539	gi|87149316|gb|DY393927.1|DY393927	678	99.25	665	5	0	206	870	14	678	0	1201
17534_Transcript_2/2_Confidence_1.000_Length_1539_45	1539	gi|87149317|gb|DY393928.1|DY393928	671	98.18	660	11	1	206	865	659	1	0	1151
17568_Transcript_1/1_Confidence_1.000_Length_823_45	823	gi|87145724|gb|DY390335.1|DY390335	711	82.54	544	76	18	3	535	23	558	1e-129	460
17568_Transcript_1/1_Confidence_1.000_Length_823_45	823	gi|87145725|gb|DY390336.1|DY390336	494	83.3	437	58	14	108	535	482	52	6e-108	388
17568_Transcript_1/1_Confidence_1.000_Length_823_45	823	gi|87150155|gb|DY394766.1|DY394766	684	80.64	532	77	24	4	525	17	532	6e-108	388
17568_Transcript_1/1_Confidence_1.000_Length_823_45	823	gi|87150156|gb|DY394767.1|DY394767	659	80.58	520	77	22	15	525	654	150	3e-105	379
17568_Transcript_1/1_Confidence_1.000_Length_823_45	823	gi|87139143|gb|DY383754.1|DY383754	248	77.64	246	25	22	480	716	13	237	6e-28	122
17568_Transcript_1/1_Confidence_1.000_Length_823_45	823	gi|87144084|gb|DY388695.1|DY388695	714	78.39	199	18	19	498	684	478	663	6e-23	106
17568_Transcript_1/1_Confidence_1.000_Length_823_45	823	gi|87144986|gb|DY389597.1|DY389597	805	78.39	199	18	19	498	684	228	43	6e-23	106
17568_Transcript_1/1_Confidence_1.000_Length_823_45	823	gi|87145726|gb|DY390337.1|DY390337	800	78.39	199	18	19	498	684	359	544	6e-23	106
17568_Transcript_1/1_Confidence_1.000_Length_823_45	823	gi|87147140|gb|DY391751.1|DY391751	734	78.39	199	18	19	498	684	494	679	6e-23	106
17568_Transcript_1/1_Confidence_1.000_Length_823_45	823	gi|87147651|gb|DY392262.1|DY392262	527	78.39	199	18	19	498	684	295	480	6e-23	106
17568_Transcript_1/1_Confidence_1.000_Length_823_45	823	gi|87148315|gb|DY392926.1|DY392926	858	78.39	199	18	19	498	684	708	523	6e-23	106
17568_Transcript_1/1_Confidence_1.000_Length_823_45	823	gi|87148484|gb|DY393095.1|DY393095	757	78.39	199	18	19	498	684	512	697	6e-23	106
17568_Transcript_1/1_Confidence_1.000_Length_823_45	823	gi|87138470|gb|DY383081.1|DY383081	505	78.5	200	14	20	483	667	279	464	2e-22	104
17568_Transcript_1/1_Confidence_1.000_Length_823_45	823	gi|87138471|gb|DY383082.1|DY383082	513	78.5	200	14	20	483	667	227	42	2e-22	104
17568_Transcript_1/1_Confidence_1.000_Length_823_45	823	gi|87139183|gb|DY383794.1|DY383794	799	79.21	178	14	18	483	650	254	90	8e-22	102
17568_Transcript_1/1_Confidence_1.000_Length_823_45	823	gi|87139144|gb|DY383755.1|DY383755	232	78.42	190	15	17	480	667	220	55	3e-21	100
17568_Transcript_1/1_Confidence_1.000_Length_823_45	823	gi|87144085|gb|DY388696.1|DY388696	713	78.11	201	15	20	498	684	236	51	3e-21	100
17568_Transcript_1/1_Confidence_1.000_Length_823_45	823	gi|87143636|gb|DY388247.1|DY388247	685	78	200	15	20	483	667	440	625	1e-20	99
17568_Transcript_1/1_Confidence_1.000_Length_823_45	823	gi|87149683|gb|DY394294.1|DY394294	563	77.89	199	17	18	483	667	323	508	1e-20	99
17568_Transcript_1/1_Confidence_1.000_Length_823_45	823	gi|87149684|gb|DY394295.1|DY394295	531	77.89	199	17	18	483	667	209	24	1e-20	99
17568_Transcript_1/1_Confidence_1.000_Length_823_45	823	gi|87147652|gb|DY392263.1|DY392263	560	80.82	146	7	15	498	633	233	99	1e-19	95.3
17568_Transcript_1/1_Confidence_1.000_Length_823_45	823	gi|87148485|gb|DY393096.1|DY393096	657	77.04	196	26	15	498	684	245	60	1e-19	95.3
17568_Transcript_1/1_Confidence_1.000_Length_823_45	823	gi|87142916|gb|DY387527.1|DY387527	476	82.61	115	7	11	483	587	362	473	6e-18	89.8
17568_Transcript_1/1_Confidence_1.000_Length_823_45	823	gi|87142917|gb|DY387528.1|DY387528	463	82.61	115	7	11	483	587	349	460	6e-18	89.8
17568_Transcript_1/1_Confidence_1.000_Length_823_45	823	gi|87142483|gb|DY387094.1|DY387094	430	94.44	54	3	0	483	536	82	29	3e-16	84.2
1758_Transcript_1/2_Confidence_1.000_Length_302_45	302	gi|87150593|gb|DY395204.1|DY395204	751	100	275	0	0	28	302	634	360	1e-144	508
17601_Transcript_1/4_Confidence_0.667_Length_839_45	839	gi|87138450|gb|DY383061.1|DY383061	770	89.84	374	22	5	1	371	294	654	3e-131	466
17601_Transcript_1/4_Confidence_0.667_Length_839_45	839	gi|87138454|gb|DY383065.1|DY383065	843	89.84	374	22	5	1	371	616	256	3e-131	466
17601_Transcript_1/4_Confidence_0.667_Length_839_45	839	gi|87138454|gb|DY383065.1|DY383065	843	92.52	254	11	7	455	704	250	1	2e-98	357
17601_Transcript_1/4_Confidence_0.667_Length_839_45	839	gi|87139511|gb|DY384122.1|DY384122	718	89.84	374	22	5	1	371	419	59	3e-131	466
17601_Transcript_1/4_Confidence_0.667_Length_839_45	839	gi|87139512|gb|DY384123.1|DY384123	706	89.84	374	22	5	1	371	288	648	3e-131	466
17601_Transcript_1/4_Confidence_0.667_Length_839_45	839	gi|87142930|gb|DY387541.1|DY387541	690	89.84	374	22	5	1	371	384	24	3e-131	466
17667_Transcript_1/1_Confidence_1.000_Length_896_45	896	gi|87148287|gb|DY392898.1|DY392898	874	98.57	837	11	1	61	896	851	15	0	1478
17667_Transcript_1/1_Confidence_1.000_Length_896_45	896	gi|87148288|gb|DY392899.1|DY392899	832	98.46	780	11	1	61	839	53	832	0	1373
17667_Transcript_1/1_Confidence_1.000_Length_896_45	896	gi|87145404|gb|DY390015.1|DY390015	719	99.8	488	1	0	65	552	719	232	0	896
17677_Transcript_1/1_Confidence_1.000_Length_291_45	291	gi|87142345|gb|DY386956.1|DY386956	820	95.85	265	8	3	29	291	1	264	1e-119	425
17694_Transcript_2/3_Confidence_0.714_Length_470_45	470	gi|87144653|gb|DY389264.1|DY389264	592	92.35	170	13	0	4	173	268	437	3e-64	243
17694_Transcript_2/3_Confidence_0.714_Length_470_45	470	gi|87144654|gb|DY389265.1|DY389265	585	92.35	170	13	0	4	173	318	149	3e-64	243
1776_Transcript_9/10_Confidence_0.514_Length_1417_45	1417	gi|87149041|gb|DY393652.1|DY393652	872	95.06	890	22	10	312	1200	1	869	0	1380
1776_Transcript_9/10_Confidence_0.514_Length_1417_45	1417	gi|87141292|gb|DY385903.1|DY385903	724	85.81	747	63	27	421	1156	717	3	0	752
1776_Transcript_9/10_Confidence_0.514_Length_1417_45	1417	gi|87141258|gb|DY385869.1|DY385869	756	85.34	757	68	27	403	1148	725	1	0	743
1776_Transcript_9/10_Confidence_0.514_Length_1417_45	1417	gi|87140137|gb|DY384748.1|DY384748	894	84.66	769	76	29	655	1411	894	156	0	728
1776_Transcript_9/10_Confidence_0.514_Length_1417_45	1417	gi|87140761|gb|DY385372.1|DY385372	696	85.61	716	63	23	281	986	11	696	0	715
1776_Transcript_9/10_Confidence_0.514_Length_1417_45	1417	gi|87141295|gb|DY385906.1|DY385906	866	85.8	704	58	26	403	1095	191	863	0	708
1776_Transcript_9/10_Confidence_0.514_Length_1417_45	1417	gi|87140136|gb|DY384747.1|DY384747	707	87.17	561	53	16	250	802	121	670	3e-177	619
1776_Transcript_9/10_Confidence_0.514_Length_1417_45	1417	gi|87149040|gb|DY393651.1|DY393651	855	96.3	324	9	3	1095	1417	855	534	5e-150	529
1776_Transcript_9/10_Confidence_0.514_Length_1417_45	1417	gi|87141260|gb|DY385871.1|DY385871	662	84.94	551	45	22	403	943	137	659	3e-148	523
1776_Transcript_9/10_Confidence_0.514_Length_1417_45	1417	gi|87142032|gb|DY386643.1|DY386643	874	87.16	148	15	3	656	802	452	596	2e-40	165
1776_Transcript_9/10_Confidence_0.514_Length_1417_45	1417	gi|87142029|gb|DY386640.1|DY386640	874	87.5	136	14	3	669	802	863	729	4e-37	154
1776_Transcript_9/10_Confidence_0.514_Length_1417_45	1417	gi|87142535|gb|DY387146.1|DY387146	694	85.23	149	17	4	656	802	451	596	2e-35	148
17796_Transcript_1/2_Confidence_1.000_Length_954_45	954	gi|87147017|gb|DY391628.1|DY391628	457	96.3	54	2	0	372	425	217	270	7e-18	89.8
17796_Transcript_1/2_Confidence_1.000_Length_954_45	954	gi|87147018|gb|DY391629.1|DY391629	390	96.3	54	2	0	372	425	174	121	7e-18	89.8
17798_Transcript_4/4_Confidence_0.750_Length_4441_45	4441	gi|87150267|gb|DY394878.1|DY394878	523	86.35	403	38	15	211	604	129	523	8e-118	424
17798_Transcript_4/4_Confidence_0.750_Length_4441_45	4441	gi|87150268|gb|DY394879.1|DY394879	511	85.46	392	38	17	211	592	383	1	8e-108	390
1785_Transcript_2/2_Confidence_1.000_Length_420_45	420	gi|87144568|gb|DY389179.1|DY389179	838	100	28	0	0	348	375	245	272	4e-07	52.8
1785_Transcript_2/2_Confidence_1.000_Length_420_45	420	gi|87144569|gb|DY389180.1|DY389180	812	100	28	0	0	348	375	790	763	4e-07	52.8
1788_Transcript_2/3_Confidence_0.667_Length_1417_45	1417	gi|87143409|gb|DY388020.1|DY388020	672	96.09	409	16	0	732	1140	116	524	0	667
1788_Transcript_2/3_Confidence_0.667_Length_1417_45	1417	gi|87143412|gb|DY388023.1|DY388023	703	96.09	409	16	0	732	1140	556	148	0	667
17892_Transcript_2/3_Confidence_0.714_Length_243_45	243	gi|87146509|gb|DY391120.1|DY391120	848	98.03	152	3	0	50	201	659	810	3e-71	265
17892_Transcript_2/3_Confidence_0.714_Length_243_45	243	gi|87145177|gb|DY389788.1|DY389788	591	94.19	86	0	1	1	86	89	9	1e-29	126
17936_Transcript_2/3_Confidence_0.714_Length_839_45	839	gi|87142305|gb|DY386916.1|DY386916	788	89.74	273	17	5	92	363	670	408	6e-93	339
17936_Transcript_3/3_Confidence_0.714_Length_689_45	689	gi|87142305|gb|DY386916.1|DY386916	788	92.33	600	34	6	92	689	670	81	0	843
17959_Transcript_3/5_Confidence_0.600_Length_933_45	933	gi|87146848|gb|DY391459.1|DY391459	872	86.53	334	33	8	577	907	330	654	2e-98	357
17982_Transcript_1/2_Confidence_1.000_Length_414_45	414	gi|87144879|gb|DY389490.1|DY389490	797	98.08	313	6	0	1	313	485	797	2e-155	545
17982_Transcript_1/2_Confidence_1.000_Length_414_45	414	gi|87144880|gb|DY389491.1|DY389491	687	91.03	312	28	0	1	312	322	11	3e-118	422
17985_Transcript_4/5_Confidence_0.462_Length_774_45	774	gi|87146859|gb|DY391470.1|DY391470	748	83.71	534	59	26	109	628	130	649	3e-135	479
17985_Transcript_4/5_Confidence_0.462_Length_774_45	774	gi|87146860|gb|DY391471.1|DY391471	749	83.52	534	60	26	109	628	735	216	1e-133	473
17986_Transcript_1/3_Confidence_0.667_Length_1440_45	1440	gi|87138396|gb|DY383007.1|DY383007	779	92.93	198	12	2	41	237	476	280	4e-77	287
179_Transcript_3/4_Confidence_0.667_Length_2449_45	2449	gi|87146629|gb|DY391240.1|DY391240	448	99.01	406	1	1	1	406	46	448	0	725
179_Transcript_3/4_Confidence_0.667_Length_2449_45	2449	gi|87146630|gb|DY391241.1|DY391241	437	98.48	395	3	1	1	395	392	1	0	693
18011_Transcript_1/2_Confidence_1.000_Length_548_45	548	gi|87141130|gb|DY385741.1|DY385741	571	82.35	119	17	4	405	521	251	367	2e-21	100
18014_Transcript_1/1_Confidence_1.000_Length_557_45	557	gi|87143606|gb|DY388217.1|DY388217	652	90.73	151	12	2	407	556	397	248	2e-51	200
18014_Transcript_1/1_Confidence_1.000_Length_557_45	557	gi|87143632|gb|DY388243.1|DY388243	588	90.73	151	12	2	407	556	365	216	2e-51	200
18047_Transcript_1/7_Confidence_0.500_Length_1210_45	1210	gi|87138903|gb|DY383514.1|DY383514	814	83.11	657	66	44	4	634	740	103	2e-158	556
18047_Transcript_1/7_Confidence_0.500_Length_1210_45	1210	gi|87142587|gb|DY387198.1|DY387198	679	83	594	66	34	62	634	677	98	8e-143	505
18047_Transcript_1/7_Confidence_0.500_Length_1210_45	1210	gi|87138295|gb|DY382906.1|DY382906	864	85.48	241	23	12	1	235	413	179	2e-63	241
18047_Transcript_1/7_Confidence_0.500_Length_1210_45	1210	gi|87141021|gb|DY385632.1|DY385632	727	85.06	241	24	12	1	235	471	237	1e-61	235
18047_Transcript_2/7_Confidence_0.450_Length_1149_45	1149	gi|87138903|gb|DY383514.1|DY383514	814	83.01	618	60	44	4	595	740	142	1e-146	518
18047_Transcript_2/7_Confidence_0.450_Length_1149_45	1149	gi|87142587|gb|DY387198.1|DY387198	679	82.88	555	60	34	62	595	677	137	3e-131	466
18047_Transcript_2/7_Confidence_0.450_Length_1149_45	1149	gi|87138295|gb|DY382906.1|DY382906	864	85.48	241	23	12	1	235	413	179	2e-63	241
18047_Transcript_2/7_Confidence_0.450_Length_1149_45	1149	gi|87141021|gb|DY385632.1|DY385632	727	85.06	241	24	12	1	235	471	237	1e-61	235
18047_Transcript_4/7_Confidence_0.500_Length_1674_45	1674	gi|87138903|gb|DY383514.1|DY383514	814	82.44	763	79	53	4	739	740	6	5e-176	616
18047_Transcript_4/7_Confidence_0.500_Length_1674_45	1674	gi|87142587|gb|DY387198.1|DY387198	679	82.07	675	76	43	62	714	677	26	1e-151	534
18047_Transcript_4/7_Confidence_0.500_Length_1674_45	1674	gi|87138295|gb|DY382906.1|DY382906	864	85.48	241	23	12	1	235	413	179	3e-63	241
18047_Transcript_4/7_Confidence_0.500_Length_1674_45	1674	gi|87141021|gb|DY385632.1|DY385632	727	85.06	241	24	12	1	235	471	237	2e-61	235
18071_Transcript_1/2_Confidence_1.000_Length_1106_45	1106	gi|87146843|gb|DY391454.1|DY391454	778	99.65	567	1	1	472	1037	590	24	0	1035
18071_Transcript_1/2_Confidence_1.000_Length_1106_45	1106	gi|87146844|gb|DY391455.1|DY391455	861	95.58	113	4	1	362	474	1	112	5e-45	180
18079_Transcript_3/3_Confidence_0.600_Length_2890_45	2890	gi|87149144|gb|DY393755.1|DY393755	597	98.99	597	6	0	2251	2847	1	597	0	1070
18079_Transcript_3/3_Confidence_0.600_Length_2890_45	2890	gi|87149145|gb|DY393756.1|DY393756	621	98.98	590	6	0	2248	2837	590	1	0	1057
180_Transcript_3/9_Confidence_0.385_Length_1179_45	1179	gi|306441199|gb|HQ154124.1|	278	100	37	0	0	687	723	37	1	1e-11	69.4
180_Transcript_6/9_Confidence_0.577_Length_1822_45	1822	gi|306441199|gb|HQ154124.1|	278	100	37	0	0	1330	1366	37	1	2e-11	69.4
1810_Transcript_1/1_Confidence_1.000_Length_1640_45	1640	gi|87149979|gb|DY394590.1|DY394590	893	99.66	893	1	2	39	931	3	893	0	1631
1810_Transcript_1/1_Confidence_1.000_Length_1640_45	1640	gi|87149978|gb|DY394589.1|DY394589	842	99.88	804	1	0	621	1424	842	39	0	1480
1810_Transcript_1/1_Confidence_1.000_Length_1640_45	1640	gi|87142841|gb|DY387452.1|DY387452	738	99.19	738	6	0	7	744	1	738	0	1330
1810_Transcript_1/1_Confidence_1.000_Length_1640_45	1640	gi|87142840|gb|DY387451.1|DY387451	818	99.86	718	1	0	718	1435	818	101	0	1321
1810_Transcript_1/1_Confidence_1.000_Length_1640_45	1640	gi|87140415|gb|DY385026.1|DY385026	667	95.01	601	24	5	5	603	40	636	0	939
18110_Transcript_1/2_Confidence_1.000_Length_1033_45	1033	gi|87144728|gb|DY389339.1|DY389339	884	81.72	804	88	48	245	1032	884	124	3e-176	616
18110_Transcript_1/2_Confidence_1.000_Length_1033_45	1033	gi|87144729|gb|DY389340.1|DY389340	863	80.88	591	68	29	244	822	306	863	2e-118	424
18113_Transcript_3/9_Confidence_0.435_Length_945_45	945	gi|87140678|gb|DY385289.1|DY385289	711	99.75	408	1	0	1	408	205	612	0	749
18113_Transcript_3/9_Confidence_0.435_Length_945_45	945	gi|87140678|gb|DY385289.1|DY385289	711	99.07	108	1	0	488	595	604	711	1e-49	195
18113_Transcript_3/9_Confidence_0.435_Length_945_45	945	gi|87145784|gb|DY390395.1|DY390395	705	99.51	408	2	0	1	408	160	567	0	743
18113_Transcript_3/9_Confidence_0.435_Length_945_45	945	gi|87145784|gb|DY390395.1|DY390395	705	100	147	0	0	488	634	559	705	7e-73	272
18113_Transcript_3/9_Confidence_0.435_Length_945_45	945	gi|87148086|gb|DY392697.1|DY392697	758	99.51	408	2	0	1	408	198	605	0	743
18113_Transcript_3/9_Confidence_0.435_Length_945_45	945	gi|87148086|gb|DY392697.1|DY392697	758	100	162	0	0	488	649	597	758	3e-81	300
18113_Transcript_3/9_Confidence_0.435_Length_945_45	945	gi|87138427|gb|DY383038.1|DY383038	832	98.54	411	3	1	488	898	549	142	0	723
18113_Transcript_3/9_Confidence_0.435_Length_945_45	945	gi|87138427|gb|DY383038.1|DY383038	832	99.06	213	0	2	197	408	752	541	1e-105	381
18113_Transcript_3/9_Confidence_0.435_Length_945_45	945	gi|87140679|gb|DY385290.1|DY385290	729	98.54	411	3	1	488	898	551	144	0	723
18113_Transcript_3/9_Confidence_0.435_Length_945_45	945	gi|87140679|gb|DY385290.1|DY385290	729	100	187	0	0	222	408	729	543	4e-95	346
18113_Transcript_3/9_Confidence_0.435_Length_945_45	945	gi|87145783|gb|DY390394.1|DY390394	751	98.54	411	3	1	488	898	577	170	0	723
18113_Transcript_3/9_Confidence_0.435_Length_945_45	945	gi|87145783|gb|DY390394.1|DY390394	751	100	183	0	0	226	408	751	569	7e-93	339
18113_Transcript_3/9_Confidence_0.435_Length_945_45	945	gi|87147371|gb|DY391982.1|DY391982	740	98.54	411	3	1	488	898	486	79	0	723
18113_Transcript_3/9_Confidence_0.435_Length_945_45	945	gi|87147371|gb|DY391982.1|DY391982	740	97.72	263	6	0	146	408	740	478	2e-127	453
18113_Transcript_3/9_Confidence_0.435_Length_945_45	945	gi|87147859|gb|DY392470.1|DY392470	778	98.05	411	5	1	488	898	486	79	0	712
18113_Transcript_3/9_Confidence_0.435_Length_945_45	945	gi|87147859|gb|DY392470.1|DY392470	778	98.01	302	4	2	108	408	778	478	2e-148	523
18113_Transcript_3/9_Confidence_0.435_Length_945_45	945	gi|87148092|gb|DY392703.1|DY392703	788	98.04	408	8	0	1	408	704	297	0	710
18113_Transcript_3/9_Confidence_0.435_Length_945_45	945	gi|87148092|gb|DY392703.1|DY392703	788	95.44	307	8	3	488	794	305	5	8e-137	484
18113_Transcript_3/9_Confidence_0.435_Length_945_45	945	gi|87148093|gb|DY392704.1|DY392704	855	98.04	408	8	0	1	408	79	486	0	710
18113_Transcript_3/9_Confidence_0.435_Length_945_45	945	gi|87148093|gb|DY392704.1|DY392704	855	96.54	376	7	3	488	863	478	847	7e-177	617
18113_Transcript_3/9_Confidence_0.435_Length_945_45	945	gi|87148443|gb|DY393054.1|DY393054	878	98.04	408	8	0	1	408	299	706	0	710
18113_Transcript_3/9_Confidence_0.435_Length_945_45	945	gi|87148443|gb|DY393054.1|DY393054	878	98.9	181	2	0	488	668	698	878	2e-88	324
18113_Transcript_3/9_Confidence_0.435_Length_945_45	945	gi|87147858|gb|DY392469.1|DY392469	693	97.56	409	8	2	1	408	87	494	0	699
18113_Transcript_3/9_Confidence_0.435_Length_945_45	945	gi|87147858|gb|DY392469.1|DY392469	693	98.56	208	3	0	488	695	486	693	8e-102	368
18113_Transcript_3/9_Confidence_0.435_Length_945_45	945	gi|87144071|gb|DY388682.1|DY388682	588	97.13	383	9	2	1	382	207	588	0	645
18113_Transcript_3/9_Confidence_0.435_Length_945_45	945	gi|87147370|gb|DY391981.1|DY391981	856	94.6	426	5	8	1	408	189	614	0	643
18113_Transcript_3/9_Confidence_0.435_Length_945_45	945	gi|87147370|gb|DY391981.1|DY391981	856	98.03	254	2	1	488	741	606	856	6e-123	438
18113_Transcript_3/9_Confidence_0.435_Length_945_45	945	gi|87144072|gb|DY388683.1|DY388683	569	96.42	363	11	2	1	362	362	1	1e-170	597
18113_Transcript_3/9_Confidence_0.435_Length_945_45	945	gi|87148442|gb|DY393053.1|DY393053	840	95.39	369	9	4	577	945	840	480	1e-165	580
18113_Transcript_3/9_Confidence_0.435_Length_945_45	945	gi|87149393|gb|DY394004.1|DY394004	582	99.47	187	1	0	1	187	389	575	2e-93	340
18113_Transcript_3/9_Confidence_0.435_Length_945_45	945	gi|87149392|gb|DY394003.1|DY394003	598	99.46	186	1	0	1	186	194	9	7e-93	339
18121_Transcript_2/3_Confidence_0.667_Length_974_45	974	gi|87145565|gb|DY390176.1|DY390176	781	94.25	557	28	4	1	555	225	779	0	848
18156_Transcript_1/2_Confidence_1.000_Length_905_45	905	gi|87150256|gb|DY394867.1|DY394867	795	94.78	345	15	2	1	345	451	792	7e-152	534
18162_Transcript_1/1_Confidence_1.000_Length_1091_45	1091	gi|87147871|gb|DY392482.1|DY392482	810	89.71	243	23	2	231	472	567	808	6e-84	309
18177_Transcript_2/5_Confidence_0.556_Length_972_45	972	gi|87144569|gb|DY389180.1|DY389180	812	100	442	0	0	314	755	642	201	0	817
18177_Transcript_2/5_Confidence_0.556_Length_972_45	972	gi|87144569|gb|DY389180.1|DY389180	812	100	74	0	0	241	314	812	739	3e-32	137
18177_Transcript_2/5_Confidence_0.556_Length_972_45	972	gi|87144568|gb|DY389179.1|DY389179	838	99.55	443	0	2	314	755	393	834	0	806
18177_Transcript_2/5_Confidence_0.556_Length_972_45	972	gi|87144568|gb|DY389179.1|DY389179	838	99.65	287	1	0	28	314	10	296	5e-149	525
18177_Transcript_2/5_Confidence_0.556_Length_972_45	972	gi|87144711|gb|DY389322.1|DY389322	693	100	425	0	0	331	755	1	425	0	785
18183_Transcript_2/2_Confidence_1.000_Length_2017_45	2017	gi|87141867|gb|DY386478.1|DY386478	729	91.56	699	33	14	80	774	53	729	0	941
18183_Transcript_2/2_Confidence_1.000_Length_2017_45	2017	gi|87139595|gb|DY384206.1|DY384206	226	99.09	220	2	0	1345	1564	226	7	8e-110	396
18183_Transcript_2/2_Confidence_1.000_Length_2017_45	2017	gi|87139596|gb|DY384207.1|DY384207	216	95.69	209	8	1	1354	1562	1	208	2e-91	335
18191_Transcript_5/5_Confidence_0.682_Length_733_45	733	gi|87138269|gb|DY382880.1|DY382880	679	91.8	61	3	2	674	733	587	528	3e-16	84.2
18217_Transcript_1/1_Confidence_1.000_Length_755_45	755	gi|87149151|gb|DY393762.1|DY393762	883	99.69	641	1	1	115	755	4	643	0	1171
18217_Transcript_1/1_Confidence_1.000_Length_755_45	755	gi|87149975|gb|DY394586.1|DY394586	806	99.22	642	1	4	115	755	7	645	0	1155
18217_Transcript_1/1_Confidence_1.000_Length_755_45	755	gi|87149150|gb|DY393761.1|DY393761	798	99.82	566	1	0	190	755	798	233	0	1040
18217_Transcript_1/1_Confidence_1.000_Length_755_45	755	gi|87149974|gb|DY394585.1|DY394585	818	99.13	578	4	1	179	755	818	241	0	1040
18236_Transcript_1/2_Confidence_1.000_Length_2934_45	2934	gi|87140940|gb|DY385551.1|DY385551	779	81.69	71	9	4	2356	2424	702	634	2e-07	56.5
18242_Transcript_3/3_Confidence_0.600_Length_582_45	582	gi|87146317|gb|DY390928.1|DY390928	695	99.83	582	1	0	1	582	682	101	0	1070
18242_Transcript_3/3_Confidence_0.600_Length_582_45	582	gi|87146317|gb|DY390928.1|DY390928	695	98.21	56	1	0	56	111	573	518	7e-21	99
18242_Transcript_3/3_Confidence_0.600_Length_582_45	582	gi|87146317|gb|DY390928.1|DY390928	695	98.21	56	1	0	110	165	627	572	7e-21	99
18242_Transcript_3/3_Confidence_0.600_Length_582_45	582	gi|87148845|gb|DY393456.1|DY393456	695	99.83	582	1	0	1	582	682	101	0	1070
18242_Transcript_3/3_Confidence_0.600_Length_582_45	582	gi|87148845|gb|DY393456.1|DY393456	695	98.21	56	1	0	56	111	573	518	7e-21	99
18242_Transcript_3/3_Confidence_0.600_Length_582_45	582	gi|87148845|gb|DY393456.1|DY393456	695	98.21	56	1	0	110	165	627	572	7e-21	99
18242_Transcript_3/3_Confidence_0.600_Length_582_45	582	gi|87148939|gb|DY393550.1|DY393550	686	99.83	578	1	0	5	582	1	578	0	1062
18242_Transcript_3/3_Confidence_0.600_Length_582_45	582	gi|87148939|gb|DY393550.1|DY393550	686	98.21	56	1	0	110	165	52	107	7e-21	99
18242_Transcript_3/3_Confidence_0.600_Length_582_45	582	gi|87148939|gb|DY393550.1|DY393550	686	98.21	56	1	0	56	111	106	161	7e-21	99
18242_Transcript_3/3_Confidence_0.600_Length_582_45	582	gi|87146318|gb|DY390929.1|DY390929	675	98.59	569	4	3	16	582	1	567	0	1003
18242_Transcript_3/3_Confidence_0.600_Length_582_45	582	gi|87146318|gb|DY390929.1|DY390929	675	98.21	56	1	0	56	111	95	150	7e-21	99
18242_Transcript_3/3_Confidence_0.600_Length_582_45	582	gi|87146318|gb|DY390929.1|DY390929	675	96.43	56	2	0	110	165	41	96	3e-19	93.5
18297_Transcript_1/1_Confidence_1.000_Length_801_45	801	gi|87148986|gb|DY393597.1|DY393597	785	99.87	777	1	0	9	785	1	777	0	1430
18297_Transcript_1/1_Confidence_1.000_Length_801_45	801	gi|87148985|gb|DY393596.1|DY393596	767	99.87	760	1	0	27	786	767	8	0	1399
18297_Transcript_1/1_Confidence_1.000_Length_801_45	801	gi|87142415|gb|DY387026.1|DY387026	809	91.45	784	40	21	6	770	783	8	0	1051
18297_Transcript_1/1_Confidence_1.000_Length_801_45	801	gi|87142414|gb|DY387025.1|DY387025	783	90.32	785	49	22	11	777	1	776	0	1003
18297_Transcript_1/1_Confidence_1.000_Length_801_45	801	gi|87142416|gb|DY387027.1|DY387027	705	93.52	664	30	12	44	699	30	688	0	976
18309_Transcript_2/4_Confidence_0.571_Length_640_45	640	gi|87144917|gb|DY389528.1|DY389528	732	99.29	280	2	0	1	280	467	188	1e-143	507
18309_Transcript_2/4_Confidence_0.571_Length_640_45	640	gi|87144917|gb|DY389528.1|DY389528	732	100	184	0	0	418	601	184	1	1e-93	340
18309_Transcript_2/4_Confidence_0.571_Length_640_45	640	gi|87144917|gb|DY389528.1|DY389528	732	96.38	138	5	0	281	418	241	104	1e-59	228
18309_Transcript_2/4_Confidence_0.571_Length_640_45	640	gi|87145697|gb|DY390308.1|DY390308	723	99.29	280	2	0	1	280	466	187	1e-143	507
18309_Transcript_2/4_Confidence_0.571_Length_640_45	640	gi|87145697|gb|DY390308.1|DY390308	723	100	183	0	0	418	600	183	1	4e-93	339
18309_Transcript_2/4_Confidence_0.571_Length_640_45	640	gi|87145697|gb|DY390308.1|DY390308	723	96.38	138	5	0	281	418	240	103	1e-59	228
18309_Transcript_2/4_Confidence_0.571_Length_640_45	640	gi|87145698|gb|DY390309.1|DY390309	655	99.29	280	2	0	1	280	264	543	1e-143	507
18309_Transcript_2/4_Confidence_0.571_Length_640_45	640	gi|87145698|gb|DY390309.1|DY390309	655	95.65	138	6	0	281	418	490	627	5e-58	222
18309_Transcript_2/4_Confidence_0.571_Length_640_45	640	gi|87145698|gb|DY390309.1|DY390309	655	98.17	109	2	0	418	526	547	655	1e-48	191
18309_Transcript_2/4_Confidence_0.571_Length_640_45	640	gi|87146863|gb|DY391474.1|DY391474	715	99.29	280	2	0	1	280	473	194	1e-143	507
18309_Transcript_2/4_Confidence_0.571_Length_640_45	640	gi|87146863|gb|DY391474.1|DY391474	715	99.45	183	1	0	418	600	190	8	2e-91	333
18309_Transcript_2/4_Confidence_0.571_Length_640_45	640	gi|87146863|gb|DY391474.1|DY391474	715	96.38	138	5	0	281	418	247	110	1e-59	228
18309_Transcript_2/4_Confidence_0.571_Length_640_45	640	gi|87147889|gb|DY392500.1|DY392500	740	99.29	280	2	0	1	280	415	694	1e-143	507
18309_Transcript_2/4_Confidence_0.571_Length_640_45	640	gi|87147889|gb|DY392500.1|DY392500	740	100	43	0	0	418	460	698	740	3e-15	80.5
18309_Transcript_2/4_Confidence_0.571_Length_640_45	640	gi|87148942|gb|DY393553.1|DY393553	834	99.29	280	2	0	1	280	272	551	1e-143	507
18309_Transcript_2/4_Confidence_0.571_Length_640_45	640	gi|87148942|gb|DY393553.1|DY393553	834	100	193	0	0	418	610	555	747	1e-98	357
18309_Transcript_2/4_Confidence_0.571_Length_640_45	640	gi|87148942|gb|DY393553.1|DY393553	834	96.38	138	5	0	281	418	498	635	1e-59	228
18309_Transcript_2/4_Confidence_0.571_Length_640_45	640	gi|87146717|gb|DY391328.1|DY391328	760	98.93	280	3	0	1	280	272	551	5e-142	501
18309_Transcript_2/4_Confidence_0.571_Length_640_45	640	gi|87146717|gb|DY391328.1|DY391328	760	99.42	172	1	0	418	589	555	726	3e-85	313
18309_Transcript_2/4_Confidence_0.571_Length_640_45	640	gi|87146717|gb|DY391328.1|DY391328	760	95.68	139	4	2	281	418	498	635	5e-58	222
18309_Transcript_2/4_Confidence_0.571_Length_640_45	640	gi|87146718|gb|DY391329.1|DY391329	781	98.93	280	3	0	1	280	502	223	5e-142	501
18309_Transcript_2/4_Confidence_0.571_Length_640_45	640	gi|87146718|gb|DY391329.1|DY391329	781	98.84	172	2	0	418	589	219	48	1e-83	307
18309_Transcript_2/4_Confidence_0.571_Length_640_45	640	gi|87146718|gb|DY391329.1|DY391329	781	95.68	139	4	2	281	418	276	139	5e-58	222
18309_Transcript_2/4_Confidence_0.571_Length_640_45	640	gi|87146885|gb|DY391496.1|DY391496	727	98.93	280	3	0	1	280	519	240	5e-142	501
18309_Transcript_2/4_Confidence_0.571_Length_640_45	640	gi|87146885|gb|DY391496.1|DY391496	727	99.42	172	1	0	418	589	236	65	3e-85	313
18309_Transcript_2/4_Confidence_0.571_Length_640_45	640	gi|87146885|gb|DY391496.1|DY391496	727	95.68	139	4	2	281	418	293	156	5e-58	222
18309_Transcript_2/4_Confidence_0.571_Length_640_45	640	gi|87146886|gb|DY391497.1|DY391497	728	98.93	280	3	0	1	280	210	489	5e-142	501
18309_Transcript_2/4_Confidence_0.571_Length_640_45	640	gi|87146886|gb|DY391497.1|DY391497	728	99.42	172	1	0	418	589	493	664	3e-85	313
18309_Transcript_2/4_Confidence_0.571_Length_640_45	640	gi|87146886|gb|DY391497.1|DY391497	728	95.68	139	4	2	281	418	436	573	5e-58	222
18309_Transcript_2/4_Confidence_0.571_Length_640_45	640	gi|87147891|gb|DY392502.1|DY392502	775	98.93	280	3	0	1	280	510	231	5e-142	501
18309_Transcript_2/4_Confidence_0.571_Length_640_45	640	gi|87147891|gb|DY392502.1|DY392502	775	99.42	172	1	0	418	589	227	56	3e-85	313
18309_Transcript_2/4_Confidence_0.571_Length_640_45	640	gi|87147891|gb|DY392502.1|DY392502	775	95.68	139	4	2	281	418	284	147	5e-58	222
18309_Transcript_2/4_Confidence_0.571_Length_640_45	640	gi|87147892|gb|DY392503.1|DY392503	714	98.93	280	3	0	1	280	263	542	5e-142	501
18309_Transcript_2/4_Confidence_0.571_Length_640_45	640	gi|87147892|gb|DY392503.1|DY392503	714	99.41	169	1	0	418	586	546	714	1e-83	307
18309_Transcript_2/4_Confidence_0.571_Length_640_45	640	gi|87147892|gb|DY392503.1|DY392503	714	95.68	139	4	2	281	418	489	626	5e-58	222
18309_Transcript_2/4_Confidence_0.571_Length_640_45	640	gi|87149788|gb|DY394399.1|DY394399	738	98.93	280	3	0	1	280	246	525	5e-142	501
18309_Transcript_2/4_Confidence_0.571_Length_640_45	640	gi|87149788|gb|DY394399.1|DY394399	738	99.42	172	1	0	418	589	529	700	3e-85	313
18309_Transcript_2/4_Confidence_0.571_Length_640_45	640	gi|87149788|gb|DY394399.1|DY394399	738	95.68	139	4	2	281	418	472	609	5e-58	222
18309_Transcript_2/4_Confidence_0.571_Length_640_45	640	gi|87149789|gb|DY394400.1|DY394400	738	98.93	280	3	0	1	280	493	214	5e-142	501
18309_Transcript_2/4_Confidence_0.571_Length_640_45	640	gi|87149789|gb|DY394400.1|DY394400	738	98.26	172	3	0	418	589	210	39	6e-82	302
18309_Transcript_2/4_Confidence_0.571_Length_640_45	640	gi|87149789|gb|DY394400.1|DY394400	738	95.68	139	4	2	281	418	267	130	5e-58	222
18309_Transcript_2/4_Confidence_0.571_Length_640_45	640	gi|87144918|gb|DY389529.1|DY389529	738	98.57	280	4	0	1	280	266	545	2e-140	496
18309_Transcript_2/4_Confidence_0.571_Length_640_45	640	gi|87144918|gb|DY389529.1|DY389529	738	99.45	183	1	0	418	600	549	731	2e-91	333
18309_Transcript_2/4_Confidence_0.571_Length_640_45	640	gi|87144918|gb|DY389529.1|DY389529	738	96.38	138	5	0	281	418	492	629	1e-59	228
18309_Transcript_2/4_Confidence_0.571_Length_640_45	640	gi|87146864|gb|DY391475.1|DY391475	738	98.21	280	5	0	1	280	266	545	1e-138	490
18309_Transcript_2/4_Confidence_0.571_Length_640_45	640	gi|87146864|gb|DY391475.1|DY391475	738	100	183	0	0	418	600	549	731	4e-93	339
18309_Transcript_2/4_Confidence_0.571_Length_640_45	640	gi|87146864|gb|DY391475.1|DY391475	738	96.38	138	5	0	281	418	492	629	1e-59	228
18309_Transcript_2/4_Confidence_0.571_Length_640_45	640	gi|87145907|gb|DY390518.1|DY390518	769	98.21	279	5	0	1	279	513	235	4e-138	488
18309_Transcript_2/4_Confidence_0.571_Length_640_45	640	gi|87145907|gb|DY390518.1|DY390518	769	99.42	172	1	0	418	589	230	59	3e-85	313
18309_Transcript_2/4_Confidence_0.571_Length_640_45	640	gi|87145907|gb|DY390518.1|DY390518	769	94.24	139	6	2	281	418	287	150	1e-54	211
18309_Transcript_2/4_Confidence_0.571_Length_640_45	640	gi|87146558|gb|DY391169.1|DY391169	769	98.21	279	5	0	1	279	333	611	4e-138	488
18309_Transcript_2/4_Confidence_0.571_Length_640_45	640	gi|87146558|gb|DY391169.1|DY391169	769	98.68	151	2	0	418	568	616	766	6e-72	268
18309_Transcript_2/4_Confidence_0.571_Length_640_45	640	gi|87146558|gb|DY391169.1|DY391169	769	94.24	139	6	2	281	418	559	696	1e-54	211
18309_Transcript_2/4_Confidence_0.571_Length_640_45	640	gi|87148596|gb|DY393207.1|DY393207	806	98.21	279	5	0	1	279	507	229	4e-138	488
18309_Transcript_2/4_Confidence_0.571_Length_640_45	640	gi|87148596|gb|DY393207.1|DY393207	806	99.42	172	1	0	418	589	224	53	3e-85	313
18309_Transcript_2/4_Confidence_0.571_Length_640_45	640	gi|87148596|gb|DY393207.1|DY393207	806	94.24	139	6	2	281	418	281	144	1e-54	211
18309_Transcript_2/4_Confidence_0.571_Length_640_45	640	gi|87148597|gb|DY393208.1|DY393208	787	98.21	279	5	0	1	279	291	569	4e-138	488
18309_Transcript_2/4_Confidence_0.571_Length_640_45	640	gi|87148597|gb|DY393208.1|DY393208	787	99.42	172	1	0	418	589	574	745	3e-85	313
18309_Transcript_2/4_Confidence_0.571_Length_640_45	640	gi|87148597|gb|DY393208.1|DY393208	787	94.24	139	6	2	281	418	517	654	1e-54	211
18309_Transcript_2/4_Confidence_0.571_Length_640_45	640	gi|87150233|gb|DY394844.1|DY394844	756	98.21	279	5	0	1	279	516	238	4e-138	488
18309_Transcript_2/4_Confidence_0.571_Length_640_45	640	gi|87150233|gb|DY394844.1|DY394844	756	99.42	172	1	0	418	589	233	62	3e-85	313
18309_Transcript_2/4_Confidence_0.571_Length_640_45	640	gi|87150233|gb|DY394844.1|DY394844	756	94.24	139	6	2	281	418	290	153	1e-54	211
18309_Transcript_2/4_Confidence_0.571_Length_640_45	640	gi|87144222|gb|DY388833.1|DY388833	689	97.85	279	6	0	1	279	500	222	2e-136	483
18309_Transcript_2/4_Confidence_0.571_Length_640_45	640	gi|87144222|gb|DY388833.1|DY388833	689	98.82	169	2	0	418	586	217	49	6e-82	302
18309_Transcript_2/4_Confidence_0.571_Length_640_45	640	gi|87144222|gb|DY388833.1|DY388833	689	94.2	138	8	0	281	418	274	137	1e-54	211
18309_Transcript_2/4_Confidence_0.571_Length_640_45	640	gi|87144223|gb|DY388834.1|DY388834	657	97.85	279	6	0	1	279	168	446	2e-136	483
18309_Transcript_2/4_Confidence_0.571_Length_640_45	640	gi|87144223|gb|DY388834.1|DY388834	657	98.82	169	2	0	418	586	451	619	6e-82	302
18309_Transcript_2/4_Confidence_0.571_Length_640_45	640	gi|87144223|gb|DY388834.1|DY388834	657	94.2	138	8	0	281	418	394	531	1e-54	211
18309_Transcript_2/4_Confidence_0.571_Length_640_45	640	gi|87144471|gb|DY389082.1|DY389082	692	97.85	279	6	0	1	279	499	221	2e-136	483
18309_Transcript_2/4_Confidence_0.571_Length_640_45	640	gi|87144471|gb|DY389082.1|DY389082	692	98.82	169	2	0	418	586	216	48	6e-82	302
18309_Transcript_2/4_Confidence_0.571_Length_640_45	640	gi|87144471|gb|DY389082.1|DY389082	692	94.2	138	8	0	281	418	273	136	1e-54	211
18309_Transcript_2/4_Confidence_0.571_Length_640_45	640	gi|87144472|gb|DY389083.1|DY389083	666	97.85	279	6	0	1	279	168	446	2e-136	483
18309_Transcript_2/4_Confidence_0.571_Length_640_45	640	gi|87144472|gb|DY389083.1|DY389083	666	98.22	169	3	0	418	586	451	619	3e-80	296
18309_Transcript_2/4_Confidence_0.571_Length_640_45	640	gi|87144472|gb|DY389083.1|DY389083	666	94.2	138	8	0	281	418	394	531	1e-54	211
18309_Transcript_2/4_Confidence_0.571_Length_640_45	640	gi|87146557|gb|DY391168.1|DY391168	625	97.85	279	6	0	1	279	543	265	2e-136	483
18309_Transcript_2/4_Confidence_0.571_Length_640_45	640	gi|87146557|gb|DY391168.1|DY391168	625	98.26	172	3	0	418	589	260	89	6e-82	302
18309_Transcript_2/4_Confidence_0.571_Length_640_45	640	gi|87146557|gb|DY391168.1|DY391168	625	93.53	139	7	2	281	418	317	180	5e-53	206
18309_Transcript_2/4_Confidence_0.571_Length_640_45	640	gi|87147419|gb|DY392030.1|DY392030	556	97.85	279	6	0	1	279	366	88	2e-136	483
18309_Transcript_2/4_Confidence_0.571_Length_640_45	640	gi|87147419|gb|DY392030.1|DY392030	556	93.94	132	8	0	281	412	140	9	2e-51	200
18309_Transcript_2/4_Confidence_0.571_Length_640_45	640	gi|87147419|gb|DY392030.1|DY392030	556	100	75	0	0	418	492	83	9	5e-33	139
18309_Transcript_2/4_Confidence_0.571_Length_640_45	640	gi|87147420|gb|DY392031.1|DY392031	555	97.85	279	6	0	1	279	190	468	2e-136	483
18309_Transcript_2/4_Confidence_0.571_Length_640_45	640	gi|87147420|gb|DY392031.1|DY392031	555	93.94	132	8	0	281	412	416	547	2e-51	200
18309_Transcript_2/4_Confidence_0.571_Length_640_45	640	gi|87147420|gb|DY392031.1|DY392031	555	100	75	0	0	418	492	473	547	5e-33	139
18309_Transcript_2/4_Confidence_0.571_Length_640_45	640	gi|87147425|gb|DY392036.1|DY392036	690	97.85	279	6	0	1	279	500	222	2e-136	483
18309_Transcript_2/4_Confidence_0.571_Length_640_45	640	gi|87147425|gb|DY392036.1|DY392036	690	98.82	169	2	0	418	586	217	49	6e-82	302
18309_Transcript_2/4_Confidence_0.571_Length_640_45	640	gi|87147425|gb|DY392036.1|DY392036	690	94.2	138	8	0	281	418	274	137	1e-54	211
18309_Transcript_2/4_Confidence_0.571_Length_640_45	640	gi|87150059|gb|DY394670.1|DY394670	640	97.85	279	6	0	1	279	450	172	2e-136	483
18309_Transcript_2/4_Confidence_0.571_Length_640_45	640	gi|87150059|gb|DY394670.1|DY394670	640	98.74	159	2	0	418	576	167	9	2e-76	283
18309_Transcript_2/4_Confidence_0.571_Length_640_45	640	gi|87150059|gb|DY394670.1|DY394670	640	94.2	138	8	0	281	418	224	87	1e-54	211
18309_Transcript_2/4_Confidence_0.571_Length_640_45	640	gi|87150060|gb|DY394671.1|DY394671	640	97.85	279	6	0	1	279	191	469	2e-136	483
18309_Transcript_2/4_Confidence_0.571_Length_640_45	640	gi|87150060|gb|DY394671.1|DY394671	640	98.74	159	2	0	418	576	474	632	2e-76	283
18309_Transcript_2/4_Confidence_0.571_Length_640_45	640	gi|87150060|gb|DY394671.1|DY394671	640	94.2	138	8	0	281	418	417	554	1e-54	211
18309_Transcript_2/4_Confidence_0.571_Length_640_45	640	gi|87145461|gb|DY390072.1|DY390072	762	97.49	279	7	0	1	279	480	202	9e-135	477
18309_Transcript_2/4_Confidence_0.571_Length_640_45	640	gi|87145461|gb|DY390072.1|DY390072	762	100	169	0	0	418	586	197	29	3e-85	313
18309_Transcript_2/4_Confidence_0.571_Length_640_45	640	gi|87145461|gb|DY390072.1|DY390072	762	94.93	138	7	0	281	418	254	117	2e-56	217
18309_Transcript_2/4_Confidence_0.571_Length_640_45	640	gi|87145462|gb|DY390073.1|DY390073	652	97.49	279	7	0	1	279	282	560	9e-135	477
18309_Transcript_2/4_Confidence_0.571_Length_640_45	640	gi|87145462|gb|DY390073.1|DY390073	652	94.93	138	7	0	281	418	508	645	2e-56	217
18309_Transcript_2/4_Confidence_0.571_Length_640_45	640	gi|87145462|gb|DY390073.1|DY390073	652	100	88	0	0	418	505	565	652	3e-40	163
18309_Transcript_2/4_Confidence_0.571_Length_640_45	640	gi|87145908|gb|DY390519.1|DY390519	655	97.13	279	8	0	1	279	266	544	4e-133	472
18309_Transcript_2/4_Confidence_0.571_Length_640_45	640	gi|87145908|gb|DY390519.1|DY390519	655	94.24	139	6	2	281	418	492	629	1e-54	211
18309_Transcript_2/4_Confidence_0.571_Length_640_45	640	gi|87145908|gb|DY390519.1|DY390519	655	97.2	107	3	0	418	524	549	655	2e-46	183
18309_Transcript_2/4_Confidence_0.571_Length_640_45	640	gi|87147426|gb|DY392037.1|DY392037	659	97.13	279	8	0	1	279	190	468	4e-133	472
18309_Transcript_2/4_Confidence_0.571_Length_640_45	640	gi|87147426|gb|DY392037.1|DY392037	659	97.63	169	4	0	418	586	473	641	1e-78	291
18309_Transcript_2/4_Confidence_0.571_Length_640_45	640	gi|87147426|gb|DY392037.1|DY392037	659	93.48	138	9	0	281	418	416	553	5e-53	206
18309_Transcript_2/4_Confidence_0.571_Length_640_45	640	gi|87144914|gb|DY389525.1|DY389525	852	96.8	281	7	2	1	280	187	466	5e-132	468
18309_Transcript_2/4_Confidence_0.571_Length_640_45	640	gi|87144914|gb|DY389525.1|DY389525	852	99.42	172	1	0	418	589	470	641	3e-85	313
18309_Transcript_2/4_Confidence_0.571_Length_640_45	640	gi|87144914|gb|DY389525.1|DY389525	852	96.38	138	5	0	281	418	413	550	1e-59	228
18309_Transcript_2/4_Confidence_0.571_Length_640_45	640	gi|87146024|gb|DY390635.1|DY390635	676	96.8	281	7	2	1	280	176	455	5e-132	468
18309_Transcript_2/4_Confidence_0.571_Length_640_45	640	gi|87146024|gb|DY390635.1|DY390635	676	99.42	172	1	0	418	589	459	630	3e-85	313
18309_Transcript_2/4_Confidence_0.571_Length_640_45	640	gi|87146024|gb|DY390635.1|DY390635	676	96.38	138	5	0	281	418	402	539	1e-59	228
18309_Transcript_2/4_Confidence_0.571_Length_640_45	640	gi|87146025|gb|DY390636.1|DY390636	661	96.8	281	7	2	1	280	486	207	5e-132	468
18309_Transcript_2/4_Confidence_0.571_Length_640_45	640	gi|87146025|gb|DY390636.1|DY390636	661	98.84	172	2	0	418	589	203	32	1e-83	307
18309_Transcript_2/4_Confidence_0.571_Length_640_45	640	gi|87146025|gb|DY390636.1|DY390636	661	96.38	138	5	0	281	418	260	123	1e-59	228
18309_Transcript_2/4_Confidence_0.571_Length_640_45	640	gi|87147631|gb|DY392242.1|DY392242	680	96.8	281	7	2	1	280	490	211	5e-132	468
18309_Transcript_2/4_Confidence_0.571_Length_640_45	640	gi|87147631|gb|DY392242.1|DY392242	680	99.42	172	1	0	418	589	207	36	3e-85	313
18309_Transcript_2/4_Confidence_0.571_Length_640_45	640	gi|87147631|gb|DY392242.1|DY392242	680	96.38	138	5	0	281	418	264	127	1e-59	228
18309_Transcript_2/4_Confidence_0.571_Length_640_45	640	gi|87147632|gb|DY392243.1|DY392243	720	96.8	281	7	2	1	280	197	476	5e-132	468
18309_Transcript_2/4_Confidence_0.571_Length_640_45	640	gi|87147632|gb|DY392243.1|DY392243	720	99.42	172	1	0	418	589	480	651	3e-85	313
18309_Transcript_2/4_Confidence_0.571_Length_640_45	640	gi|87147632|gb|DY392243.1|DY392243	720	96.38	138	5	0	281	418	423	560	1e-59	228
18309_Transcript_2/4_Confidence_0.571_Length_640_45	640	gi|87147756|gb|DY392367.1|DY392367	680	96.8	281	7	2	1	280	490	211	5e-132	468
18309_Transcript_2/4_Confidence_0.571_Length_640_45	640	gi|87147756|gb|DY392367.1|DY392367	680	99.42	172	1	0	418	589	207	36	3e-85	313
18309_Transcript_2/4_Confidence_0.571_Length_640_45	640	gi|87147756|gb|DY392367.1|DY392367	680	96.38	138	5	0	281	418	264	127	1e-59	228
18309_Transcript_2/4_Confidence_0.571_Length_640_45	640	gi|87147757|gb|DY392368.1|DY392368	679	96.8	281	7	2	1	280	190	469	5e-132	468
18309_Transcript_2/4_Confidence_0.571_Length_640_45	640	gi|87147757|gb|DY392368.1|DY392368	679	99.42	172	1	0	418	589	473	644	3e-85	313
18309_Transcript_2/4_Confidence_0.571_Length_640_45	640	gi|87147757|gb|DY392368.1|DY392368	679	96.38	138	5	0	281	418	416	553	1e-59	228
18309_Transcript_2/4_Confidence_0.571_Length_640_45	640	gi|87149486|gb|DY394097.1|DY394097	654	96.8	281	7	2	1	280	500	221	5e-132	468
18309_Transcript_2/4_Confidence_0.571_Length_640_45	640	gi|87149486|gb|DY394097.1|DY394097	654	99.42	172	1	0	418	589	217	46	3e-85	313
18309_Transcript_2/4_Confidence_0.571_Length_640_45	640	gi|87149486|gb|DY394097.1|DY394097	654	96.38	138	5	0	281	418	274	137	1e-59	228
18309_Transcript_2/4_Confidence_0.571_Length_640_45	640	gi|87146424|gb|DY391035.1|DY391035	695	96.79	280	7	2	1	279	505	227	2e-131	466
18309_Transcript_2/4_Confidence_0.571_Length_640_45	640	gi|87146424|gb|DY391035.1|DY391035	695	99.42	172	1	0	418	589	223	52	3e-85	313
18309_Transcript_2/4_Confidence_0.571_Length_640_45	640	gi|87146424|gb|DY391035.1|DY391035	695	95.65	138	5	1	281	418	279	143	2e-57	220
18309_Transcript_2/4_Confidence_0.571_Length_640_45	640	gi|87149201|gb|DY393812.1|DY393812	683	96.79	280	7	2	1	279	495	217	2e-131	466
18309_Transcript_2/4_Confidence_0.571_Length_640_45	640	gi|87149201|gb|DY393812.1|DY393812	683	98.82	169	2	0	418	586	212	44	6e-82	302
18309_Transcript_2/4_Confidence_0.571_Length_640_45	640	gi|87149201|gb|DY393812.1|DY393812	683	94.93	138	7	0	281	418	269	132	2e-56	217
18309_Transcript_2/4_Confidence_0.571_Length_640_45	640	gi|87149202|gb|DY393813.1|DY393813	668	96.79	280	7	2	1	279	174	452	2e-131	466
18309_Transcript_2/4_Confidence_0.571_Length_640_45	640	gi|87149202|gb|DY393813.1|DY393813	668	98.82	169	2	0	418	586	457	625	6e-82	302
18309_Transcript_2/4_Confidence_0.571_Length_640_45	640	gi|87149202|gb|DY393813.1|DY393813	668	94.93	138	7	0	281	418	400	537	2e-56	217
18309_Transcript_2/4_Confidence_0.571_Length_640_45	640	gi|87149387|gb|DY393998.1|DY393998	675	96.79	280	7	2	1	279	487	209	2e-131	466
18309_Transcript_2/4_Confidence_0.571_Length_640_45	640	gi|87149387|gb|DY393998.1|DY393998	675	98.82	169	2	0	418	586	204	36	6e-82	302
18309_Transcript_2/4_Confidence_0.571_Length_640_45	640	gi|87149387|gb|DY393998.1|DY393998	675	94.93	138	7	0	281	418	261	124	2e-56	217
18309_Transcript_2/4_Confidence_0.571_Length_640_45	640	gi|87149388|gb|DY393999.1|DY393999	675	96.79	280	7	2	1	279	181	459	2e-131	466
18309_Transcript_2/4_Confidence_0.571_Length_640_45	640	gi|87149388|gb|DY393999.1|DY393999	675	98.82	169	2	0	418	586	464	632	6e-82	302
18309_Transcript_2/4_Confidence_0.571_Length_640_45	640	gi|87149388|gb|DY393999.1|DY393999	675	94.93	138	7	0	281	418	407	544	2e-56	217
18309_Transcript_2/4_Confidence_0.571_Length_640_45	640	gi|87146425|gb|DY391036.1|DY391036	609	96.07	280	9	2	1	279	191	469	4e-128	455
18309_Transcript_2/4_Confidence_0.571_Length_640_45	640	gi|87146425|gb|DY391036.1|DY391036	609	98.54	137	2	0	418	554	473	609	4e-64	243
18309_Transcript_2/4_Confidence_0.571_Length_640_45	640	gi|87146425|gb|DY391036.1|DY391036	609	94.93	138	6	1	281	418	417	553	8e-56	215
18309_Transcript_2/4_Confidence_0.571_Length_640_45	640	gi|87149991|gb|DY394602.1|DY394602	721	96.07	280	9	2	1	279	492	214	4e-128	455
18309_Transcript_2/4_Confidence_0.571_Length_640_45	640	gi|87149991|gb|DY394602.1|DY394602	721	98.81	168	2	0	418	585	209	42	2e-81	300
18309_Transcript_2/4_Confidence_0.571_Length_640_45	640	gi|87149991|gb|DY394602.1|DY394602	721	94.93	138	7	0	281	418	266	129	2e-56	217
18309_Transcript_2/4_Confidence_0.571_Length_640_45	640	gi|87149992|gb|DY394603.1|DY394603	728	96.07	280	9	2	1	279	229	507	4e-128	455
18309_Transcript_2/4_Confidence_0.571_Length_640_45	640	gi|87149992|gb|DY394603.1|DY394603	728	98.81	168	2	0	418	585	512	679	2e-81	300
18309_Transcript_2/4_Confidence_0.571_Length_640_45	640	gi|87149992|gb|DY394603.1|DY394603	728	94.93	138	7	0	281	418	455	592	2e-56	217
18309_Transcript_2/4_Confidence_0.571_Length_640_45	640	gi|87138509|gb|DY383120.1|DY383120	700	94.68	282	9	6	1	279	497	219	2e-121	433
18309_Transcript_2/4_Confidence_0.571_Length_640_45	640	gi|87138509|gb|DY383120.1|DY383120	700	93.49	169	11	0	417	585	215	47	6e-67	252
18309_Transcript_2/4_Confidence_0.571_Length_640_45	640	gi|87138509|gb|DY383120.1|DY383120	700	91.43	140	12	0	279	418	273	134	4e-49	193
18309_Transcript_2/4_Confidence_0.571_Length_640_45	640	gi|87138510|gb|DY383121.1|DY383121	690	94.68	282	9	6	1	279	204	482	2e-121	433
18309_Transcript_2/4_Confidence_0.571_Length_640_45	640	gi|87138510|gb|DY383121.1|DY383121	690	93.49	169	11	0	417	585	486	654	6e-67	252
18309_Transcript_2/4_Confidence_0.571_Length_640_45	640	gi|87138510|gb|DY383121.1|DY383121	690	91.43	140	12	0	279	418	428	567	4e-49	193
18309_Transcript_2/4_Confidence_0.571_Length_640_45	640	gi|87138822|gb|DY383433.1|DY383433	688	94.29	280	14	2	1	279	499	221	9e-120	427
18309_Transcript_2/4_Confidence_0.571_Length_640_45	640	gi|87138822|gb|DY383433.1|DY383433	688	97.09	172	5	0	418	589	216	45	1e-78	291
18309_Transcript_2/4_Confidence_0.571_Length_640_45	640	gi|87138822|gb|DY383433.1|DY383433	688	91.43	140	12	0	279	418	275	136	4e-49	193
18309_Transcript_2/4_Confidence_0.571_Length_640_45	640	gi|87138823|gb|DY383434.1|DY383434	706	94.29	280	14	2	1	279	208	486	9e-120	427
18309_Transcript_2/4_Confidence_0.571_Length_640_45	640	gi|87138823|gb|DY383434.1|DY383434	706	97.09	172	5	0	418	589	491	662	1e-78	291
18309_Transcript_2/4_Confidence_0.571_Length_640_45	640	gi|87138823|gb|DY383434.1|DY383434	706	91.43	140	12	0	279	418	432	571	4e-49	193
18309_Transcript_2/4_Confidence_0.571_Length_640_45	640	gi|87149086|gb|DY393697.1|DY393697	821	95.52	268	10	2	13	279	308	574	9e-120	427
18309_Transcript_2/4_Confidence_0.571_Length_640_45	640	gi|87149086|gb|DY393697.1|DY393697	821	94.12	170	10	0	418	587	579	748	3e-69	259
18309_Transcript_2/4_Confidence_0.571_Length_640_45	640	gi|87149086|gb|DY393697.1|DY393697	821	91.43	140	12	0	279	418	520	659	4e-49	193
18309_Transcript_2/4_Confidence_0.571_Length_640_45	640	gi|87149087|gb|DY393698.1|DY393698	800	95.52	268	10	2	13	279	493	227	9e-120	427
18309_Transcript_2/4_Confidence_0.571_Length_640_45	640	gi|87149087|gb|DY393698.1|DY393698	800	93.53	170	11	0	418	587	222	53	2e-67	254
18309_Transcript_2/4_Confidence_0.571_Length_640_45	640	gi|87149087|gb|DY393698.1|DY393698	800	91.43	140	12	0	279	418	281	142	4e-49	193
18309_Transcript_2/4_Confidence_0.571_Length_640_45	640	gi|87139625|gb|DY384236.1|DY384236	378	93.99	283	9	8	1	279	340	62	4e-118	422
18309_Transcript_2/4_Confidence_0.571_Length_640_45	640	gi|87139625|gb|DY384236.1|DY384236	378	93.97	116	7	0	279	394	116	1	4e-44	176
18309_Transcript_2/4_Confidence_0.571_Length_640_45	640	gi|87139625|gb|DY384236.1|DY384236	378	96.55	58	2	0	417	474	58	1	3e-20	97.1
18309_Transcript_2/4_Confidence_0.571_Length_640_45	640	gi|87142765|gb|DY387376.1|DY387376	623	93.95	281	14	3	1	279	496	217	4e-118	422
18309_Transcript_2/4_Confidence_0.571_Length_640_45	640	gi|87142765|gb|DY387376.1|DY387376	623	97.09	172	5	0	418	589	212	41	1e-78	291
18309_Transcript_2/4_Confidence_0.571_Length_640_45	640	gi|87142765|gb|DY387376.1|DY387376	623	90.78	141	12	1	279	418	272	132	2e-47	187
18309_Transcript_2/4_Confidence_0.571_Length_640_45	640	gi|87142766|gb|DY387377.1|DY387377	629	93.95	281	14	3	1	279	128	407	4e-118	422
18309_Transcript_2/4_Confidence_0.571_Length_640_45	640	gi|87142766|gb|DY387377.1|DY387377	629	97.09	172	5	0	418	589	412	583	1e-78	291
18309_Transcript_2/4_Confidence_0.571_Length_640_45	640	gi|87142766|gb|DY387377.1|DY387377	629	90.78	141	12	1	279	418	352	492	2e-47	187
18309_Transcript_2/4_Confidence_0.571_Length_640_45	640	gi|87143693|gb|DY388304.1|DY388304	552	93.31	284	9	10	1	279	191	469	9e-115	411
18309_Transcript_2/4_Confidence_0.571_Length_640_45	640	gi|87143693|gb|DY388304.1|DY388304	552	91.91	136	11	0	279	414	415	550	1e-48	191
18309_Transcript_2/4_Confidence_0.571_Length_640_45	640	gi|87143693|gb|DY388304.1|DY388304	552	92.31	78	6	0	417	494	473	550	1e-24	111
18309_Transcript_2/4_Confidence_0.571_Length_640_45	640	gi|87146709|gb|DY391320.1|DY391320	697	92.17	281	18	4	1	279	493	215	9e-110	394
18309_Transcript_2/4_Confidence_0.571_Length_640_45	640	gi|87146709|gb|DY391320.1|DY391320	697	90.07	141	12	2	279	418	269	130	8e-46	182
18309_Transcript_2/4_Confidence_0.571_Length_640_45	640	gi|87146710|gb|DY391321.1|DY391321	697	91.81	281	19	4	1	279	205	483	4e-108	388
18309_Transcript_2/4_Confidence_0.571_Length_640_45	640	gi|87146710|gb|DY391321.1|DY391321	697	90.07	141	12	2	279	418	429	568	8e-46	182
18309_Transcript_2/4_Confidence_0.571_Length_640_45	640	gi|87139626|gb|DY384237.1|DY384237	378	93.21	265	9	9	20	279	51	311	7e-106	381
18309_Transcript_2/4_Confidence_0.571_Length_640_45	640	gi|87139626|gb|DY384237.1|DY384237	378	94.64	112	6	0	279	390	257	368	1e-43	174
18309_Transcript_2/4_Confidence_0.571_Length_640_45	640	gi|87139626|gb|DY384237.1|DY384237	378	98.15	54	1	0	417	470	315	368	1e-19	95.3
18309_Transcript_2/4_Confidence_0.571_Length_640_45	640	gi|87150505|gb|DY395116.1|DY395116	428	98.12	160	3	0	1	160	261	420	3e-75	279
18309_Transcript_2/4_Confidence_0.571_Length_640_45	640	gi|87150504|gb|DY395115.1|DY395115	441	97.5	160	4	0	1	160	168	9	1e-73	274
18309_Transcript_2/4_Confidence_0.571_Length_640_45	640	gi|87145643|gb|DY390254.1|DY390254	696	95.29	170	6	2	13	181	571	403	6e-72	268
18309_Transcript_2/4_Confidence_0.571_Length_640_45	640	gi|87145644|gb|DY390255.1|DY390255	664	95.29	170	6	2	13	181	248	416	6e-72	268
18309_Transcript_2/4_Confidence_0.571_Length_640_45	640	gi|87143696|gb|DY388307.1|DY388307	702	92.9	169	12	0	417	585	617	449	3e-65	246
18309_Transcript_2/4_Confidence_0.571_Length_640_45	640	gi|87143696|gb|DY388307.1|DY388307	702	90	140	14	0	279	418	675	536	8e-46	182
18309_Transcript_2/4_Confidence_0.571_Length_640_45	640	gi|87147890|gb|DY392501.1|DY392501	677	100	129	0	0	485	613	677	549	5e-63	239
18309_Transcript_2/4_Confidence_0.571_Length_640_45	640	gi|87148980|gb|DY393591.1|DY393591	271	94.59	74	4	0	1	74	83	10	8e-26	115
18340_Transcript_2/2_Confidence_1.000_Length_1059_45	1059	gi|87145915|gb|DY390526.1|DY390526	792	99.24	792	6	0	28	819	1	792	0	1430
18340_Transcript_2/2_Confidence_1.000_Length_1059_45	1059	gi|87145916|gb|DY390527.1|DY390527	642	99.84	642	1	0	295	936	642	1	0	1181
18340_Transcript_2/2_Confidence_1.000_Length_1059_45	1059	gi|87138321|gb|DY382932.1|DY382932	453	83.33	408	50	15	466	861	10	411	2e-99	361
18340_Transcript_2/2_Confidence_1.000_Length_1059_45	1059	gi|87138322|gb|DY382933.1|DY382933	452	83.09	408	52	14	465	861	444	43	7e-98	355
18382_Transcript_3/4_Confidence_0.667_Length_1157_45	1157	gi|87141644|gb|DY386255.1|DY386255	605	89.21	630	36	14	20	642	605	1	0	758
18382_Transcript_3/4_Confidence_0.667_Length_1157_45	1157	gi|87141645|gb|DY386256.1|DY386256	604	88.29	632	37	17	20	642	1	604	0	723
18382_Transcript_3/4_Confidence_0.667_Length_1157_45	1157	gi|87141636|gb|DY386247.1|DY386247	581	79.91	468	47	29	212	672	150	577	4e-81	300
18382_Transcript_3/4_Confidence_0.667_Length_1157_45	1157	gi|87141637|gb|DY386248.1|DY386248	569	78.49	451	46	33	212	652	414	5	1e-65	248
18382_Transcript_3/4_Confidence_0.667_Length_1157_45	1157	gi|87149414|gb|DY394025.1|DY394025	755	74.73	459	94	19	221	672	170	613	1e-46	185
18384_Transcript_1/1_Confidence_1.000_Length_1059_45	1059	gi|87140282|gb|DY384893.1|DY384893	693	91.11	686	40	6	372	1038	4	687	0	909
18384_Transcript_1/1_Confidence_1.000_Length_1059_45	1059	gi|87140283|gb|DY384894.1|DY384894	673	88.17	634	52	8	425	1038	673	43	0	734
1839_Transcript_1/4_Confidence_0.733_Length_1195_45	1195	gi|87149305|gb|DY393916.1|DY393916	309	100	94	0	0	1	94	94	1	2e-43	174
1839_Transcript_1/4_Confidence_0.733_Length_1195_45	1195	gi|87149306|gb|DY393917.1|DY393917	309	100	94	0	0	1	94	216	309	2e-43	174
18407_Transcript_1/1_Confidence_1.000_Length_865_45	865	gi|87138210|gb|DY382821.1|DY382821	912	98.52	474	5	1	171	642	484	11	0	835
18407_Transcript_1/1_Confidence_1.000_Length_865_45	865	gi|87138210|gb|DY382821.1|DY382821	912	100	44	0	0	822	865	358	315	1e-15	82.4
18407_Transcript_1/1_Confidence_1.000_Length_865_45	865	gi|87138210|gb|DY382821.1|DY382821	912	100	44	0	0	1	44	469	426	1e-15	82.4
18407_Transcript_1/1_Confidence_1.000_Length_865_45	865	gi|87147273|gb|DY391884.1|DY391884	598	99.31	434	1	1	226	657	165	598	0	784
18407_Transcript_1/1_Confidence_1.000_Length_865_45	865	gi|87147273|gb|DY391884.1|DY391884	598	97.67	172	4	0	1	172	37	208	4e-80	296
18407_Transcript_1/1_Confidence_1.000_Length_865_45	865	gi|87147273|gb|DY391884.1|DY391884	598	100	44	0	0	822	865	236	279	1e-15	82.4
18407_Transcript_1/1_Confidence_1.000_Length_865_45	865	gi|87143515|gb|DY388126.1|DY388126	475	95.85	482	8	7	179	658	1	472	0	769
18407_Transcript_1/1_Confidence_1.000_Length_865_45	865	gi|87143515|gb|DY388126.1|DY388126	475	100	44	0	0	822	865	119	162	1e-15	82.4
18407_Transcript_1/1_Confidence_1.000_Length_865_45	865	gi|87143515|gb|DY388126.1|DY388126	475	90.91	44	4	0	1	44	8	51	5e-09	60.2
18407_Transcript_1/1_Confidence_1.000_Length_865_45	865	gi|87139529|gb|DY384140.1|DY384140	508	95.65	483	6	8	181	657	1	474	0	761
18407_Transcript_1/1_Confidence_1.000_Length_865_45	865	gi|87139529|gb|DY384140.1|DY384140	508	100	44	0	0	822	865	117	160	1e-15	82.4
18407_Transcript_1/1_Confidence_1.000_Length_865_45	865	gi|87139529|gb|DY384140.1|DY384140	508	100	40	0	0	5	44	10	49	2e-13	75
18407_Transcript_1/1_Confidence_1.000_Length_865_45	865	gi|87147274|gb|DY391885.1|DY391885	599	98.16	435	6	1	226	658	435	1	0	758
18407_Transcript_1/1_Confidence_1.000_Length_865_45	865	gi|87147274|gb|DY391885.1|DY391885	599	100	172	0	0	1	172	563	392	8e-87	318
18407_Transcript_1/1_Confidence_1.000_Length_865_45	865	gi|87147274|gb|DY391885.1|DY391885	599	100	44	0	0	822	865	364	321	1e-15	82.4
18407_Transcript_1/1_Confidence_1.000_Length_865_45	865	gi|87143845|gb|DY388456.1|DY388456	504	95.93	467	7	7	171	635	490	34	0	747
18407_Transcript_1/1_Confidence_1.000_Length_865_45	865	gi|87143845|gb|DY388456.1|DY388456	504	100	44	0	0	822	865	364	321	1e-15	82.4
18407_Transcript_1/1_Confidence_1.000_Length_865_45	865	gi|87143845|gb|DY388456.1|DY388456	504	97.73	44	1	0	1	44	475	432	5e-14	76.8
18407_Transcript_1/1_Confidence_1.000_Length_865_45	865	gi|87143446|gb|DY388057.1|DY388057	470	96.3	459	5	7	171	627	450	2	0	743
18407_Transcript_1/1_Confidence_1.000_Length_865_45	865	gi|87143446|gb|DY388057.1|DY388057	470	100	44	0	0	822	865	324	281	1e-15	82.4
18407_Transcript_1/1_Confidence_1.000_Length_865_45	865	gi|87143446|gb|DY388057.1|DY388057	470	97.73	44	1	0	1	44	435	392	5e-14	76.8
18407_Transcript_1/1_Confidence_1.000_Length_865_45	865	gi|87143846|gb|DY388457.1|DY388457	495	95.5	467	8	8	171	635	8	463	0	734
18407_Transcript_1/1_Confidence_1.000_Length_865_45	865	gi|87143846|gb|DY388457.1|DY388457	495	100	44	0	0	822	865	133	176	1e-15	82.4
18407_Transcript_1/1_Confidence_1.000_Length_865_45	865	gi|87139530|gb|DY384141.1|DY384141	493	92.81	487	18	9	175	654	485	9	0	689
18407_Transcript_1/1_Confidence_1.000_Length_865_45	865	gi|87139530|gb|DY384141.1|DY384141	493	100	44	0	0	822	865	363	320	1e-15	82.4
18407_Transcript_1/1_Confidence_1.000_Length_865_45	865	gi|87139530|gb|DY384141.1|DY384141	493	97.73	44	1	0	1	44	474	431	5e-14	76.8
18407_Transcript_1/1_Confidence_1.000_Length_865_45	865	gi|87138296|gb|DY382907.1|DY382907	822	99.19	369	1	1	171	537	454	822	0	664
18407_Transcript_1/1_Confidence_1.000_Length_865_45	865	gi|87138296|gb|DY382907.1|DY382907	822	100	44	0	0	1	44	469	512	1e-15	82.4
18407_Transcript_1/1_Confidence_1.000_Length_865_45	865	gi|87138296|gb|DY382907.1|DY382907	822	100	44	0	0	822	865	580	623	1e-15	82.4
18436_Transcript_1/1_Confidence_1.000_Length_1063_45	1063	gi|87147470|gb|DY392081.1|DY392081	387	98.97	195	2	0	2	196	193	387	3e-96	350
18436_Transcript_1/1_Confidence_1.000_Length_1063_45	1063	gi|87147471|gb|DY392082.1|DY392082	388	96.81	188	5	1	2	189	187	1	4e-85	313
18439_Transcript_1/1_Confidence_1.000_Length_2012_45	2012	gi|87145518|gb|DY390129.1|DY390129	732	99.17	724	6	0	786	1509	9	732	0	1304
18439_Transcript_1/1_Confidence_1.000_Length_2012_45	2012	gi|87140010|gb|DY384621.1|DY384621	721	96.49	713	25	0	6	718	9	721	0	1179
18439_Transcript_1/1_Confidence_1.000_Length_2012_45	2012	gi|87140011|gb|DY384622.1|DY384622	760	94.56	478	23	3	1481	1957	720	245	0	736
18470_Transcript_5/5_Confidence_0.750_Length_3158_45	3158	gi|87138330|gb|DY382941.1|DY382941	829	95.05	829	41	0	1498	2326	1	829	0	1304
18484_Transcript_1/1_Confidence_1.000_Length_649_45	649	gi|87138329|gb|DY382940.1|DY382940	722	90.68	322	29	1	300	621	55	375	9e-120	427
18487_Transcript_2/6_Confidence_0.667_Length_1601_45	1601	gi|87143420|gb|DY388031.1|DY388031	659	97.65	597	14	0	1	597	607	11	0	1026
18487_Transcript_2/6_Confidence_0.667_Length_1601_45	1601	gi|87146427|gb|DY391038.1|DY391038	750	96.19	630	11	5	85	702	1	629	0	1018
18487_Transcript_2/6_Confidence_0.667_Length_1601_45	1601	gi|87146427|gb|DY391038.1|DY391038	750	100	123	0	0	793	915	628	750	3e-59	228
18487_Transcript_2/6_Confidence_0.667_Length_1601_45	1601	gi|87143421|gb|DY388032.1|DY388032	589	95.85	579	23	1	23	600	4	582	0	935
18487_Transcript_2/6_Confidence_0.667_Length_1601_45	1601	gi|87146426|gb|DY391037.1|DY391037	710	97.18	531	8	4	178	702	660	131	0	891
18487_Transcript_2/6_Confidence_0.667_Length_1601_45	1601	gi|87146426|gb|DY391037.1|DY391037	710	94.17	120	7	0	793	912	132	13	6e-46	183
18487_Transcript_2/6_Confidence_0.667_Length_1601_45	1601	gi|87143423|gb|DY388034.1|DY388034	489	94.83	484	25	0	11	494	1	484	0	756
18487_Transcript_3/6_Confidence_0.667_Length_1630_45	1630	gi|87143420|gb|DY388031.1|DY388031	659	97.64	593	14	0	1	593	607	15	0	1018
18487_Transcript_3/6_Confidence_0.667_Length_1630_45	1630	gi|87143421|gb|DY388032.1|DY388032	589	95.98	572	22	1	23	593	4	575	0	928
18487_Transcript_3/6_Confidence_0.667_Length_1630_45	1630	gi|87146427|gb|DY391038.1|DY391038	750	95.39	521	11	5	85	593	1	520	0	817
18487_Transcript_3/6_Confidence_0.667_Length_1630_45	1630	gi|87146427|gb|DY391038.1|DY391038	750	100	239	0	0	706	944	512	750	8e-124	442
18487_Transcript_3/6_Confidence_0.667_Length_1630_45	1630	gi|87143423|gb|DY388034.1|DY388034	489	94.83	484	25	0	11	494	1	484	0	756
18487_Transcript_3/6_Confidence_0.667_Length_1630_45	1630	gi|87146426|gb|DY391037.1|DY391037	710	96.45	422	8	4	178	593	660	240	0	689
18487_Transcript_3/6_Confidence_0.667_Length_1630_45	1630	gi|87146426|gb|DY391037.1|DY391037	710	97.03	236	7	0	706	941	248	13	2e-110	398
1853_Transcript_2/3_Confidence_0.714_Length_1937_45	1937	gi|87141912|gb|DY386523.1|DY386523	909	94.88	820	37	5	855	1671	3	820	0	1277
1853_Transcript_2/3_Confidence_0.714_Length_1937_45	1937	gi|87141913|gb|DY386524.1|DY386524	717	90.14	578	51	6	1104	1678	717	143	0	747
1858_Transcript_2/4_Confidence_0.750_Length_656_45	656	gi|87142561|gb|DY387172.1|DY387172	771	90.03	682	36	22	2	656	50	726	0	854
1858_Transcript_2/4_Confidence_0.750_Length_656_45	656	gi|87145301|gb|DY389912.1|DY389912	701	91.21	307	22	4	353	656	328	632	3e-115	412
18611_Transcript_1/1_Confidence_1.000_Length_348_45	348	gi|87142035|gb|DY386646.1|DY386646	860	84.97	306	19	13	68	348	14	317	3e-77	285
18615_Transcript_1/1_Confidence_1.000_Length_1195_45	1195	gi|87141099|gb|DY385710.1|DY385710	546	92.72	522	26	10	92	609	546	33	0	743
18615_Transcript_1/1_Confidence_1.000_Length_1195_45	1195	gi|87141176|gb|DY385787.1|DY385787	556	88.78	517	46	9	97	609	14	522	2e-178	623
18652_Transcript_1/1_Confidence_1.000_Length_873_45	873	gi|87138845|gb|DY383456.1|DY383456	711	86.93	482	56	6	149	625	480	1	7e-152	534
1869_Transcript_2/3_Confidence_0.667_Length_1366_45	1366	gi|87145302|gb|DY389913.1|DY389913	675	85.9	454	38	24	863	1303	674	234	2e-129	460
1869_Transcript_2/3_Confidence_0.667_Length_1366_45	1366	gi|87142561|gb|DY387172.1|DY387172	771	96.63	89	1	2	502	588	683	771	6e-35	147
1873_Transcript_3/3_Confidence_0.800_Length_1719_45	1719	gi|87146061|gb|DY390672.1|DY390672	806	99.47	759	4	0	1	759	48	806	0	1380
1873_Transcript_3/3_Confidence_0.800_Length_1719_45	1719	gi|87150413|gb|DY395024.1|DY395024	737	99.71	691	2	0	1	691	47	737	0	1266
1873_Transcript_3/3_Confidence_0.800_Length_1719_45	1719	gi|87150412|gb|DY395023.1|DY395023	788	98.75	320	4	0	607	926	788	469	4e-162	569
1873_Transcript_3/3_Confidence_0.800_Length_1719_45	1719	gi|87146060|gb|DY390671.1|DY390671	708	97.92	240	4	1	688	926	708	469	2e-115	414
18745_Transcript_1/1_Confidence_1.000_Length_366_45	366	gi|87149262|gb|DY393873.1|DY393873	827	100	366	0	0	1	366	274	639	0	676
18745_Transcript_1/1_Confidence_1.000_Length_366_45	366	gi|87149263|gb|DY393874.1|DY393874	801	100	366	0	0	1	366	569	204	0	676
18745_Transcript_1/1_Confidence_1.000_Length_366_45	366	gi|87146907|gb|DY391518.1|DY391518	751	99.18	366	3	0	1	366	593	228	0	660
18745_Transcript_1/1_Confidence_1.000_Length_366_45	366	gi|87145753|gb|DY390364.1|DY390364	547	100	349	0	0	1	349	199	547	0	645
18745_Transcript_1/1_Confidence_1.000_Length_366_45	366	gi|87148586|gb|DY393197.1|DY393197	724	99.4	336	1	1	1	336	335	1	2e-174	608
18745_Transcript_1/1_Confidence_1.000_Length_366_45	366	gi|87145754|gb|DY390365.1|DY390365	534	96.76	340	3	8	1	337	336	2	5e-160	560
18745_Transcript_1/1_Confidence_1.000_Length_366_45	366	gi|87140741|gb|DY385352.1|DY385352	649	94.69	320	15	2	1	318	330	649	1e-140	496
18745_Transcript_1/1_Confidence_1.000_Length_366_45	366	gi|87140754|gb|DY385365.1|DY385365	639	96.13	284	11	0	1	284	356	639	4e-131	464
18745_Transcript_1/1_Confidence_1.000_Length_366_45	366	gi|87139036|gb|DY383647.1|DY383647	769	89.64	357	33	4	1	355	497	143	3e-127	451
18745_Transcript_1/1_Confidence_1.000_Length_366_45	366	gi|87149453|gb|DY394064.1|DY394064	884	89.39	358	32	6	1	355	508	154	1e-125	446
18745_Transcript_1/1_Confidence_1.000_Length_366_45	366	gi|87146908|gb|DY391519.1|DY391519	795	98.18	220	4	0	1	220	576	795	3e-107	385
18745_Transcript_1/1_Confidence_1.000_Length_366_45	366	gi|87146888|gb|DY391499.1|DY391499	759	88.43	242	22	6	117	355	759	521	9e-78	287
18745_Transcript_1/1_Confidence_1.000_Length_366_45	366	gi|87146887|gb|DY391498.1|DY391498	758	88.46	234	21	6	125	355	3	233	5e-75	278
18745_Transcript_1/1_Confidence_1.000_Length_366_45	366	gi|87148519|gb|DY393130.1|DY393130	348	99.32	147	1	0	220	366	344	198	1e-71	267
18745_Transcript_1/1_Confidence_1.000_Length_366_45	366	gi|87148518|gb|DY393129.1|DY393129	367	100	143	0	0	224	366	9	151	4e-71	265
18745_Transcript_1/1_Confidence_1.000_Length_366_45	366	gi|87146073|gb|DY390684.1|DY390684	737	100	96	0	0	1	96	642	737	6e-45	178
18756_Transcript_1/3_Confidence_0.667_Length_890_45	890	gi|87139705|gb|DY384316.1|DY384316	760	92.57	565	31	9	112	666	760	197	0	800
18775_Transcript_1/1_Confidence_1.000_Length_916_45	916	gi|87140324|gb|DY384935.1|DY384935	753	91.3	655	40	11	265	916	745	105	0	878
18775_Transcript_1/1_Confidence_1.000_Length_916_45	916	gi|87140323|gb|DY384934.1|DY384934	742	91.12	653	40	12	267	916	1	638	0	869
18779_Transcript_1/2_Confidence_1.000_Length_598_45	598	gi|87138601|gb|DY383212.1|DY383212	497	93.61	454	18	9	47	495	17	464	0	667
18779_Transcript_1/2_Confidence_1.000_Length_598_45	598	gi|87138602|gb|DY383213.1|DY383213	496	92.46	464	23	10	37	495	489	33	0	652
1878_Transcript_1/1_Confidence_1.000_Length_905_45	905	gi|87148150|gb|DY392761.1|DY392761	823	98.52	812	6	5	79	887	14	822	0	1428
1878_Transcript_1/1_Confidence_1.000_Length_905_45	905	gi|87148151|gb|DY392762.1|DY392762	810	98.51	804	8	3	74	876	801	1	0	1415
1878_Transcript_1/1_Confidence_1.000_Length_905_45	905	gi|87150574|gb|DY395185.1|DY395185	738	99.48	575	3	0	302	876	583	9	0	1046
1878_Transcript_1/1_Confidence_1.000_Length_905_45	905	gi|87150575|gb|DY395186.1|DY395186	865	99.12	455	4	0	302	756	411	865	0	819
1878_Transcript_1/1_Confidence_1.000_Length_905_45	905	gi|87141938|gb|DY386549.1|DY386549	678	93.86	472	22	6	143	611	473	6	0	704
1878_Transcript_1/1_Confidence_1.000_Length_905_45	905	gi|87150369|gb|DY394980.1|DY394980	854	84.43	546	81	4	303	846	648	105	7e-152	534
1878_Transcript_1/1_Confidence_1.000_Length_905_45	905	gi|87147455|gb|DY392066.1|DY392066	830	84.25	546	81	5	303	846	647	105	1e-149	527
1878_Transcript_1/1_Confidence_1.000_Length_905_45	905	gi|87147456|gb|DY392067.1|DY392067	773	84.58	506	74	4	303	806	259	762	3e-141	499
1878_Transcript_1/1_Confidence_1.000_Length_905_45	905	gi|87146187|gb|DY390798.1|DY390798	680	84.88	410	60	2	296	704	272	680	4e-115	412
18797_Transcript_3/3_Confidence_0.714_Length_1617_45	1617	gi|87144956|gb|DY389567.1|DY389567	455	100	455	0	0	1020	1474	455	1	0	841
18797_Transcript_3/3_Confidence_0.714_Length_1617_45	1617	gi|87144957|gb|DY389568.1|DY389568	448	100	448	0	0	1027	1474	1	448	0	828
18801_Transcript_2/3_Confidence_0.667_Length_3319_45	3319	gi|87143562|gb|DY388173.1|DY388173	824	99.64	824	3	0	2074	2897	1	824	0	1506
18801_Transcript_2/3_Confidence_0.667_Length_3319_45	3319	gi|87143561|gb|DY388172.1|DY388172	807	99.42	692	3	1	2629	3319	807	116	0	1254
18801_Transcript_2/3_Confidence_0.667_Length_3319_45	3319	gi|87147203|gb|DY391814.1|DY391814	706	98.59	708	8	2	1535	2242	1	706	0	1251
18801_Transcript_2/3_Confidence_0.667_Length_3319_45	3319	gi|87141050|gb|DY385661.1|DY385661	663	96.03	655	24	2	2011	2664	10	663	0	1064
18801_Transcript_2/3_Confidence_0.667_Length_3319_45	3319	gi|87149013|gb|DY393624.1|DY393624	338	99.59	246	1	0	3074	3319	338	93	1e-125	449
18801_Transcript_2/3_Confidence_0.667_Length_3319_45	3319	gi|87149014|gb|DY393625.1|DY393625	325	96.57	233	8	0	3087	3319	1	233	8e-107	387
18801_Transcript_2/3_Confidence_0.667_Length_3319_45	3319	gi|87143919|gb|DY388530.1|DY388530	732	95.8	119	5	0	2869	2987	13	131	2e-48	193
18808_Transcript_6/6_Confidence_0.524_Length_924_45	924	gi|87144537|gb|DY389148.1|DY389148	736	92.12	546	41	2	304	848	624	80	0	769
18808_Transcript_6/6_Confidence_0.524_Length_924_45	924	gi|87144536|gb|DY389147.1|DY389147	784	94.5	400	20	2	304	702	386	784	3e-176	616
18808_Transcript_6/6_Confidence_0.524_Length_924_45	924	gi|87146014|gb|DY390625.1|DY390625	520	93.58	374	24	0	475	848	506	133	4e-159	558
18808_Transcript_6/6_Confidence_0.524_Length_924_45	924	gi|87144525|gb|DY389136.1|DY389136	741	87.84	329	32	5	464	785	434	107	4e-105	379
18822_Transcript_1/3_Confidence_0.667_Length_650_45	650	gi|87142382|gb|DY386993.1|DY386993	368	89.25	372	33	7	21	389	368	1	3e-129	459
18851_Transcript_2/2_Confidence_1.000_Length_914_45	914	gi|87138135|gb|DY382746.1|DY382746	701	89.24	251	27	0	408	658	147	397	1e-85	315
18851_Transcript_2/2_Confidence_1.000_Length_914_45	914	gi|87138221|gb|DY382832.1|DY382832	693	89.24	251	27	0	408	658	547	297	1e-85	315
18851_Transcript_2/2_Confidence_1.000_Length_914_45	914	gi|87143379|gb|DY387990.1|DY387990	327	87.55	241	28	2	408	647	250	11	1e-74	278
1885_Transcript_1/1_Confidence_1.000_Length_694_45	694	gi|87149246|gb|DY393857.1|DY393857	706	98.98	687	4	2	4	687	687	1	0	1227
1885_Transcript_1/1_Confidence_1.000_Length_694_45	694	gi|87149247|gb|DY393858.1|DY393858	713	98.84	687	5	2	4	687	19	705	0	1221
1885_Transcript_1/1_Confidence_1.000_Length_694_45	694	gi|87139201|gb|DY383812.1|DY383812	647	93.53	587	26	10	17	600	64	641	0	863
1885_Transcript_1/1_Confidence_1.000_Length_694_45	694	gi|87139200|gb|DY383811.1|DY383811	649	93.11	595	29	10	17	608	594	9	0	861
1885_Transcript_1/1_Confidence_1.000_Length_694_45	694	gi|87145557|gb|DY390168.1|DY390168	400	100	266	0	0	133	398	266	1	3e-139	492
1885_Transcript_1/1_Confidence_1.000_Length_694_45	694	gi|87145558|gb|DY390169.1|DY390169	390	100	266	0	0	133	398	117	382	3e-139	492
18861_Transcript_1/3_Confidence_0.429_Length_1650_45	1650	gi|87139105|gb|DY383716.1|DY383716	404	94.8	404	21	0	789	1192	404	1	2e-180	630
18861_Transcript_1/3_Confidence_0.429_Length_1650_45	1650	gi|87139106|gb|DY383717.1|DY383717	436	89.32	440	37	8	141	574	1	436	2e-154	544
18861_Transcript_2/3_Confidence_0.571_Length_1409_45	1409	gi|87139106|gb|DY383717.1|DY383717	436	89.32	440	37	8	141	574	1	436	2e-154	544
18879_Transcript_1/1_Confidence_1.000_Length_1709_45	1709	gi|87149307|gb|DY393918.1|DY393918	823	98.54	478	5	2	378	855	348	823	0	843
18880_Transcript_1/1_Confidence_1.000_Length_1397_45	1397	gi|87148224|gb|DY392835.1|DY392835	732	81.43	533	89	10	610	1137	727	200	2e-119	427
18880_Transcript_1/1_Confidence_1.000_Length_1397_45	1397	gi|87148225|gb|DY392836.1|DY392836	706	80.47	512	90	10	631	1137	1	507	4e-106	383
1888_Transcript_2/7_Confidence_0.500_Length_1275_45	1275	gi|87138150|gb|DY382761.1|DY382761	819	94.94	811	30	9	66	872	16	819	0	1260
1888_Transcript_2/7_Confidence_0.500_Length_1275_45	1275	gi|87138151|gb|DY382762.1|DY382762	775	94.74	627	25	8	422	1044	775	153	0	968
1888_Transcript_2/7_Confidence_0.500_Length_1275_45	1275	gi|87147971|gb|DY392582.1|DY392582	828	97.91	191	4	0	555	745	2	192	1e-90	331
1888_Transcript_2/7_Confidence_0.500_Length_1275_45	1275	gi|87147971|gb|DY392582.1|DY392582	828	90.78	206	17	2	840	1044	457	661	3e-73	274
1888_Transcript_2/7_Confidence_0.500_Length_1275_45	1275	gi|87147971|gb|DY392582.1|DY392582	828	95.4	87	4	0	743	829	274	360	1e-32	139
1888_Transcript_2/7_Confidence_0.500_Length_1275_45	1275	gi|87147970|gb|DY392581.1|DY392581	746	90.78	206	17	2	840	1044	372	168	3e-73	274
1888_Transcript_2/7_Confidence_0.500_Length_1275_45	1275	gi|87147970|gb|DY392581.1|DY392581	746	98.18	110	2	0	636	745	746	637	7e-49	193
1888_Transcript_2/7_Confidence_0.500_Length_1275_45	1275	gi|87147970|gb|DY392581.1|DY392581	746	95.4	87	4	0	743	829	555	469	1e-32	139
18898_Transcript_1/4_Confidence_0.700_Length_495_45	495	gi|87145825|gb|DY390436.1|DY390436	775	94.12	68	4	0	124	191	76	9	1e-22	104
1893_Transcript_1/2_Confidence_1.000_Length_884_45	884	gi|87145986|gb|DY390597.1|DY390597	475	98.74	475	6	0	259	733	475	1	0	845
1893_Transcript_1/2_Confidence_1.000_Length_884_45	884	gi|87145987|gb|DY390598.1|DY390598	485	97.57	453	11	0	281	733	1	453	0	776
1893_Transcript_1/2_Confidence_1.000_Length_884_45	884	gi|87141308|gb|DY385919.1|DY385919	499	89.94	328	19	7	531	850	171	492	1e-114	411
1893_Transcript_1/2_Confidence_1.000_Length_884_45	884	gi|87141308|gb|DY385919.1|DY385919	499	95.88	97	2	2	437	532	3	98	7e-38	156
1893_Transcript_1/2_Confidence_1.000_Length_884_45	884	gi|87141309|gb|DY385920.1|DY385920	530	89.94	328	19	7	531	850	328	7	1e-114	411
1893_Transcript_1/2_Confidence_1.000_Length_884_45	884	gi|87141309|gb|DY385920.1|DY385920	530	95.88	97	2	2	437	532	496	401	7e-38	156
1893_Transcript_1/2_Confidence_1.000_Length_884_45	884	gi|87140746|gb|DY385357.1|DY385357	530	88.72	328	23	7	531	850	328	7	6e-108	388
1893_Transcript_1/2_Confidence_1.000_Length_884_45	884	gi|87140746|gb|DY385357.1|DY385357	530	95.88	97	2	2	437	532	496	401	7e-38	156
1893_Transcript_2/2_Confidence_1.000_Length_925_45	925	gi|87145986|gb|DY390597.1|DY390597	475	98.54	274	4	0	259	532	475	202	8e-137	484
1893_Transcript_2/2_Confidence_1.000_Length_925_45	925	gi|87145987|gb|DY390598.1|DY390598	485	96.43	252	9	0	281	532	1	252	3e-116	416
1893_Transcript_2/2_Confidence_1.000_Length_925_45	925	gi|87140746|gb|DY385357.1|DY385357	530	95.05	101	2	3	437	535	496	397	7e-38	156
1893_Transcript_2/2_Confidence_1.000_Length_925_45	925	gi|87141308|gb|DY385919.1|DY385919	499	95.05	101	2	3	437	535	3	102	7e-38	156
1893_Transcript_2/2_Confidence_1.000_Length_925_45	925	gi|87141309|gb|DY385920.1|DY385920	530	95.05	101	2	3	437	535	496	397	7e-38	156
18955_Transcript_1/1_Confidence_1.000_Length_542_45	542	gi|87147099|gb|DY391710.1|DY391710	665	100	262	0	0	1	262	373	112	4e-137	484
18955_Transcript_1/1_Confidence_1.000_Length_542_45	542	gi|87147100|gb|DY391711.1|DY391711	776	99.14	116	1	0	1	116	661	776	3e-54	209
18961_Transcript_1/1_Confidence_1.000_Length_1548_45	1548	gi|87142592|gb|DY387203.1|DY387203	655	88.41	656	51	10	2	655	23	655	0	767
18979_Transcript_1/1_Confidence_1.000_Length_227_45	227	gi|87148127|gb|DY392738.1|DY392738	392	100	206	0	0	22	227	360	155	2e-106	381
18979_Transcript_1/1_Confidence_1.000_Length_227_45	227	gi|87148126|gb|DY392737.1|DY392737	422	99.51	203	1	0	25	227	1	203	5e-103	370
18986_Transcript_2/2_Confidence_1.000_Length_388_45	388	gi|87144048|gb|DY388659.1|DY388659	685	87.13	303	13	13	108	388	25	323	9e-88	320
18986_Transcript_2/2_Confidence_1.000_Length_388_45	388	gi|87144049|gb|DY388660.1|DY388660	678	87.13	303	13	14	108	388	646	348	9e-88	320
18986_Transcript_2/2_Confidence_1.000_Length_388_45	388	gi|87141402|gb|DY386013.1|DY386013	500	93.02	129	7	2	261	388	329	202	1e-47	187
18986_Transcript_2/2_Confidence_1.000_Length_388_45	388	gi|87141403|gb|DY386014.1|DY386014	499	93.02	129	7	2	261	388	172	299	1e-47	187
18_Transcript_5/6_Confidence_0.455_Length_3745_45	3745	gi|87142615|gb|DY387226.1|DY387226	781	94.91	688	33	1	823	1510	1	686	0	1075
18_Transcript_5/6_Confidence_0.455_Length_3745_45	3745	gi|87142615|gb|DY387226.1|DY387226	781	89.5	781	57	24	1902	2670	14	781	0	965
1901_Transcript_1/1_Confidence_1.000_Length_955_45	955	gi|87147479|gb|DY392090.1|DY392090	737	98.37	738	8	3	206	940	737	1	0	1293
1901_Transcript_1/1_Confidence_1.000_Length_955_45	955	gi|87147480|gb|DY392091.1|DY392091	756	95.97	770	10	12	1	768	6	756	0	1230
19048_Transcript_2/3_Confidence_0.714_Length_2385_45	2385	gi|87145067|gb|DY389678.1|DY389678	802	99.35	770	5	0	812	1581	802	33	0	1395
19048_Transcript_2/3_Confidence_0.714_Length_2385_45	2385	gi|87145068|gb|DY389679.1|DY389679	839	96.17	862	10	8	7	868	1	839	0	1387
19048_Transcript_2/3_Confidence_0.714_Length_2385_45	2385	gi|87141064|gb|DY385675.1|DY385675	563	99.29	564	3	1	1470	2033	563	1	0	1018
19048_Transcript_2/3_Confidence_0.714_Length_2385_45	2385	gi|87141062|gb|DY385673.1|DY385673	547	98.73	550	2	5	1486	2033	1	547	0	972
19060_Transcript_3/3_Confidence_0.750_Length_653_45	653	gi|87145631|gb|DY390242.1|DY390242	726	95.08	61	3	0	593	653	1	61	3e-20	97.1
19087_Transcript_1/1_Confidence_1.000_Length_994_45	994	gi|87140095|gb|DY384706.1|DY384706	499	97.41	347	7	2	605	950	492	147	2e-168	590
19087_Transcript_1/1_Confidence_1.000_Length_994_45	994	gi|87140096|gb|DY384707.1|DY384707	499	97.41	347	7	2	605	950	492	147	2e-168	590
19087_Transcript_1/1_Confidence_1.000_Length_994_45	994	gi|87140094|gb|DY384705.1|DY384705	492	97.07	341	8	2	611	950	7	346	2e-163	573
19087_Transcript_1/1_Confidence_1.000_Length_994_45	994	gi|87141341|gb|DY385952.1|DY385952	400	96.4	111	2	2	841	950	393	284	1e-45	182
19087_Transcript_1/1_Confidence_1.000_Length_994_45	994	gi|87141340|gb|DY385951.1|DY385951	401	95.24	105	3	2	847	950	15	118	1e-40	165
19222_Transcript_1/5_Confidence_0.167_Length_273_45	273	gi|87149127|gb|DY393738.1|DY393738	773	92.4	250	17	2	25	273	291	539	2e-98	355
19244_Transcript_1/1_Confidence_1.000_Length_573_45	573	gi|87147831|gb|DY392442.1|DY392442	646	100	297	0	0	1	297	116	412	2e-156	549
19244_Transcript_1/1_Confidence_1.000_Length_573_45	573	gi|87147832|gb|DY392443.1|DY392443	660	100	297	0	0	1	297	513	217	2e-156	549
19254_Transcript_1/1_Confidence_1.000_Length_302_45	302	gi|87139359|gb|DY383970.1|DY383970	672	87.88	132	5	8	175	302	288	412	5e-35	145
192_Transcript_2/3_Confidence_0.667_Length_2595_45	2595	gi|87139496|gb|DY384107.1|DY384107	791	94.15	786	33	10	1750	2534	790	17	0	1184
192_Transcript_2/3_Confidence_0.667_Length_2595_45	2595	gi|87139495|gb|DY384106.1|DY384106	704	98.11	530	10	0	1237	1766	175	704	0	924
192_Transcript_2/3_Confidence_0.667_Length_2595_45	2595	gi|87139495|gb|DY384106.1|DY384106	704	96.58	146	5	0	492	637	33	178	1e-63	243
19314_Transcript_1/2_Confidence_1.000_Length_278_45	278	gi|87144866|gb|DY389477.1|DY389477	908	91.67	84	5	2	197	278	599	516	3e-26	115
19356_Transcript_2/3_Confidence_0.667_Length_646_45	646	gi|87149623|gb|DY394234.1|DY394234	848	95.74	47	1	1	600	646	30	75	1e-13	75
1940_Transcript_4/4_Confidence_0.800_Length_1328_45	1328	gi|87146344|gb|DY390955.1|DY390955	727	99.68	316	1	0	1	316	625	310	5e-165	579
1940_Transcript_4/4_Confidence_0.800_Length_1328_45	1328	gi|87146345|gb|DY390956.1|DY390956	744	99.68	316	1	0	1	316	251	566	5e-165	579
19457_Transcript_2/3_Confidence_0.818_Length_1647_45	1647	gi|87144241|gb|DY388852.1|DY388852	770	83.17	719	93	23	8	716	70	770	0	632
19457_Transcript_2/3_Confidence_0.818_Length_1647_45	1647	gi|87141624|gb|DY386235.1|DY386235	693	89.49	495	40	11	974	1464	6	492	5e-176	616
19457_Transcript_2/3_Confidence_0.818_Length_1647_45	1647	gi|87141625|gb|DY386236.1|DY386236	633	90.29	381	31	5	1085	1464	631	256	2e-139	494
19457_Transcript_2/3_Confidence_0.818_Length_1647_45	1647	gi|87144242|gb|DY388853.1|DY388853	607	83.17	309	28	15	1238	1540	554	264	3e-69	261
1945_Transcript_1/1_Confidence_1.000_Length_835_45	835	gi|87149655|gb|DY394266.1|DY394266	606	99.66	584	2	0	143	726	23	606	0	1068
1945_Transcript_1/1_Confidence_1.000_Length_835_45	835	gi|87149656|gb|DY394267.1|DY394267	605	99.32	588	2	2	140	726	587	1	0	1062
1945_Transcript_1/1_Confidence_1.000_Length_835_45	835	gi|87138260|gb|DY382871.1|DY382871	626	79.77	351	59	12	254	598	52	396	1e-64	244
1945_Transcript_1/1_Confidence_1.000_Length_835_45	835	gi|87138265|gb|DY382876.1|DY382876	626	79.77	351	59	12	254	598	575	231	1e-64	244
1945_Transcript_1/1_Confidence_1.000_Length_835_45	835	gi|87140511|gb|DY385122.1|DY385122	677	79.66	349	63	8	254	598	90	434	1e-64	244
1945_Transcript_1/1_Confidence_1.000_Length_835_45	835	gi|87140512|gb|DY385123.1|DY385123	765	79.66	349	63	8	254	598	670	326	1e-64	244
1945_Transcript_1/1_Confidence_1.000_Length_835_45	835	gi|87145893|gb|DY390504.1|DY390504	688	79.66	349	63	8	254	598	193	537	1e-64	244
1945_Transcript_1/1_Confidence_1.000_Length_835_45	835	gi|87145892|gb|DY390503.1|DY390503	669	79.08	349	65	8	254	598	663	319	3e-61	233
19469_Transcript_2/3_Confidence_0.714_Length_2020_45	2020	gi|87143958|gb|DY388569.1|DY388569	836	99.03	828	8	0	61	888	9	836	0	1485
19469_Transcript_2/3_Confidence_0.714_Length_2020_45	2020	gi|87143959|gb|DY388570.1|DY388570	713	98.04	713	9	4	757	1465	713	2	0	1234
19485_Transcript_1/1_Confidence_1.000_Length_517_45	517	gi|87148091|gb|DY392702.1|DY392702	900	98.78	411	2	3	1	410	409	1	0	728
19485_Transcript_1/1_Confidence_1.000_Length_517_45	517	gi|87148090|gb|DY392701.1|DY392701	885	96.88	256	3	5	1	254	633	885	9e-119	424
19499_Transcript_2/4_Confidence_0.571_Length_531_45	531	gi|87146745|gb|DY391356.1|DY391356	578	86.88	221	15	9	85	302	143	352	5e-62	235
19562_Transcript_1/2_Confidence_1.000_Length_1997_45	1997	gi|87146610|gb|DY391221.1|DY391221	883	99.32	884	5	1	1080	1963	883	1	0	1598
19562_Transcript_1/2_Confidence_1.000_Length_1997_45	1997	gi|87146609|gb|DY391220.1|DY391220	731	98.77	732	5	3	8	736	1	731	0	1299
19568_Transcript_1/1_Confidence_1.000_Length_286_45	286	gi|87142108|gb|DY386719.1|DY386719	542	79.9	209	12	21	101	286	186	387	2e-29	126
19568_Transcript_1/1_Confidence_1.000_Length_286_45	286	gi|87142108|gb|DY386719.1|DY386719	542	100	44	0	0	1	44	146	189	3e-16	82.4
19568_Transcript_1/1_Confidence_1.000_Length_286_45	286	gi|87142109|gb|DY386720.1|DY386720	542	79.9	209	12	21	101	286	186	387	2e-29	126
19568_Transcript_1/1_Confidence_1.000_Length_286_45	286	gi|87142109|gb|DY386720.1|DY386720	542	100	44	0	0	1	44	146	189	3e-16	82.4
19594_Transcript_1/4_Confidence_0.727_Length_646_45	646	gi|87150486|gb|DY395097.1|DY395097	826	100	297	0	0	350	646	418	122	2e-156	549
19594_Transcript_1/4_Confidence_0.727_Length_646_45	646	gi|87150486|gb|DY395097.1|DY395097	826	99.58	236	1	0	31	266	653	418	7e-121	431
19594_Transcript_2/4_Confidence_0.545_Length_640_45	640	gi|87150486|gb|DY395097.1|DY395097	826	99.75	398	1	0	243	640	519	122	0	730
1960_Transcript_1/2_Confidence_1.000_Length_1410_45	1410	gi|87141578|gb|DY386189.1|DY386189	862	88.67	856	77	19	246	1093	15	858	0	1026
1960_Transcript_1/2_Confidence_1.000_Length_1410_45	1410	gi|87141577|gb|DY386188.1|DY386188	608	89.27	522	46	10	683	1199	601	85	0	645
19613_Transcript_1/1_Confidence_1.000_Length_447_45	447	gi|87147589|gb|DY392200.1|DY392200	359	98.52	135	1	1	1	135	142	9	1e-62	237
19613_Transcript_1/1_Confidence_1.000_Length_447_45	447	gi|87147590|gb|DY392201.1|DY392201	288	97.04	135	3	1	1	135	147	280	2e-59	226
19620_Transcript_1/1_Confidence_1.000_Length_474_45	474	gi|87138857|gb|DY383468.1|DY383468	764	89.68	126	11	2	214	338	633	757	3e-39	159
19620_Transcript_1/1_Confidence_1.000_Length_474_45	474	gi|87138857|gb|DY383468.1|DY383468	764	93.9	82	5	0	129	210	383	464	1e-28	124
19620_Transcript_1/1_Confidence_1.000_Length_474_45	474	gi|87138858|gb|DY383469.1|DY383469	717	89.68	126	11	2	214	338	566	442	3e-39	159
19666_Transcript_2/4_Confidence_0.600_Length_1066_45	1066	gi|87142291|gb|DY386902.1|DY386902	789	77.26	343	46	21	732	1064	663	343	8e-43	172
19686_Transcript_1/1_Confidence_1.000_Length_609_45	609	gi|87147054|gb|DY391665.1|DY391665	816	99.43	174	0	1	436	609	39	211	7e-86	315
19686_Transcript_1/1_Confidence_1.000_Length_609_45	609	gi|87147054|gb|DY391665.1|DY391665	816	87.65	170	15	6	439	605	497	663	3e-49	193
19686_Transcript_1/1_Confidence_1.000_Length_609_45	609	gi|87138476|gb|DY383087.1|DY383087	807	98.27	173	3	0	437	609	42	214	2e-82	303
19686_Transcript_1/1_Confidence_1.000_Length_609_45	609	gi|87138476|gb|DY383087.1|DY383087	807	89.35	169	14	4	439	605	500	666	3e-54	209
19686_Transcript_1/1_Confidence_1.000_Length_609_45	609	gi|87138955|gb|DY383566.1|DY383566	696	98.27	173	3	0	437	609	62	234	2e-82	303
19686_Transcript_1/1_Confidence_1.000_Length_609_45	609	gi|87138955|gb|DY383566.1|DY383566	696	88.82	170	13	6	439	605	520	686	2e-52	204
19686_Transcript_1/1_Confidence_1.000_Length_609_45	609	gi|87142964|gb|DY387575.1|DY387575	667	98.27	173	3	0	437	609	65	237	2e-82	303
19686_Transcript_1/1_Confidence_1.000_Length_609_45	609	gi|87142964|gb|DY387575.1|DY387575	667	88.44	147	13	4	439	583	523	667	1e-43	174
19686_Transcript_1/1_Confidence_1.000_Length_609_45	609	gi|87142966|gb|DY387577.1|DY387577	600	97.69	173	4	0	437	609	45	217	7e-81	298
19686_Transcript_1/1_Confidence_1.000_Length_609_45	609	gi|87142061|gb|DY386672.1|DY386672	764	96.53	173	6	0	437	609	263	435	2e-77	287
19686_Transcript_1/1_Confidence_1.000_Length_609_45	609	gi|87142062|gb|DY386673.1|DY386673	736	94.22	173	10	0	437	609	550	378	7e-71	265
19686_Transcript_1/1_Confidence_1.000_Length_609_45	609	gi|87149345|gb|DY393956.1|DY393956	779	93.6	172	11	0	437	608	67	238	1e-68	257
19686_Transcript_1/1_Confidence_1.000_Length_609_45	609	gi|87149345|gb|DY393956.1|DY393956	779	97.87	47	1	0	316	362	67	113	8e-16	82.4
19686_Transcript_1/1_Confidence_1.000_Length_609_45	609	gi|87139155|gb|DY383766.1|DY383766	642	93.49	169	11	0	437	605	40	208	6e-67	252
19686_Transcript_1/1_Confidence_1.000_Length_609_45	609	gi|87139155|gb|DY383766.1|DY383766	642	97.87	47	1	0	316	362	40	86	8e-16	82.4
19686_Transcript_1/1_Confidence_1.000_Length_609_45	609	gi|87139388|gb|DY383999.1|DY383999	626	93.49	169	11	0	437	605	24	192	6e-67	252
19686_Transcript_1/1_Confidence_1.000_Length_609_45	609	gi|87139388|gb|DY383999.1|DY383999	626	97.87	47	1	0	316	362	24	70	8e-16	82.4
19686_Transcript_1/1_Confidence_1.000_Length_609_45	609	gi|87139393|gb|DY384004.1|DY384004	622	93.49	169	11	0	437	605	32	200	6e-67	252
19686_Transcript_1/1_Confidence_1.000_Length_609_45	609	gi|87139393|gb|DY384004.1|DY384004	622	97.87	47	1	0	316	362	32	78	8e-16	82.4
19686_Transcript_1/1_Confidence_1.000_Length_609_45	609	gi|87144046|gb|DY388657.1|DY388657	798	93.49	169	11	0	437	605	63	231	6e-67	252
19686_Transcript_1/1_Confidence_1.000_Length_609_45	609	gi|87144046|gb|DY388657.1|DY388657	798	97.87	47	1	0	316	362	63	109	8e-16	82.4
19686_Transcript_1/1_Confidence_1.000_Length_609_45	609	gi|87145178|gb|DY389789.1|DY389789	780	93.02	172	12	0	437	608	259	430	6e-67	252
19686_Transcript_1/1_Confidence_1.000_Length_609_45	609	gi|87145178|gb|DY389789.1|DY389789	780	97.87	47	1	0	316	362	259	305	8e-16	82.4
19686_Transcript_1/1_Confidence_1.000_Length_609_45	609	gi|87145178|gb|DY389789.1|DY389789	780	100	37	0	0	8	44	224	260	6e-12	69.4
19686_Transcript_1/1_Confidence_1.000_Length_609_45	609	gi|87148887|gb|DY393498.1|DY393498	727	89.47	171	17	1	437	607	29	198	7e-56	215
19686_Transcript_1/1_Confidence_1.000_Length_609_45	609	gi|87148888|gb|DY393499.1|DY393499	748	89.47	171	17	1	437	607	686	517	7e-56	215
19686_Transcript_1/1_Confidence_1.000_Length_609_45	609	gi|87140629|gb|DY385240.1|DY385240	726	88.76	169	18	1	439	607	117	284	4e-53	206
19686_Transcript_1/1_Confidence_1.000_Length_609_45	609	gi|87140665|gb|DY385276.1|DY385276	740	88.76	169	18	1	439	607	115	282	4e-53	206
19686_Transcript_1/1_Confidence_1.000_Length_609_45	609	gi|87143988|gb|DY388599.1|DY388599	781	88.89	171	14	5	439	607	273	440	4e-53	206
19686_Transcript_1/1_Confidence_1.000_Length_609_45	609	gi|87143988|gb|DY388599.1|DY388599	781	86.98	169	21	1	439	607	45	212	4e-48	189
19686_Transcript_1/1_Confidence_1.000_Length_609_45	609	gi|87148040|gb|DY392651.1|DY392651	771	88.76	169	18	1	439	607	275	442	4e-53	206
19686_Transcript_1/1_Confidence_1.000_Length_609_45	609	gi|87148041|gb|DY392652.1|DY392652	764	88.76	169	18	1	439	607	490	323	4e-53	206
19686_Transcript_1/1_Confidence_1.000_Length_609_45	609	gi|87144243|gb|DY388854.1|DY388854	808	88.69	168	17	2	439	605	336	502	2e-52	204
19686_Transcript_1/1_Confidence_1.000_Length_609_45	609	gi|87144290|gb|DY388901.1|DY388901	720	87.93	174	19	2	435	607	43	215	2e-52	204
19686_Transcript_1/1_Confidence_1.000_Length_609_45	609	gi|87144291|gb|DY388902.1|DY388902	718	88.3	171	19	1	437	607	673	504	2e-52	204
19686_Transcript_1/1_Confidence_1.000_Length_609_45	609	gi|87148030|gb|DY392641.1|DY392641	738	88.3	171	19	1	437	607	694	525	2e-52	204
19686_Transcript_1/1_Confidence_1.000_Length_609_45	609	gi|87149073|gb|DY393684.1|DY393684	859	88.3	171	19	1	437	607	30	199	2e-52	204
19686_Transcript_1/1_Confidence_1.000_Length_609_45	609	gi|87149073|gb|DY393684.1|DY393684	859	84.12	170	24	3	439	607	260	427	1e-39	161
19686_Transcript_1/1_Confidence_1.000_Length_609_45	609	gi|87149134|gb|DY393745.1|DY393745	905	88.62	167	19	0	439	605	70	236	2e-52	204
19686_Transcript_1/1_Confidence_1.000_Length_609_45	609	gi|87141622|gb|DY386233.1|DY386233	427	90.2	153	15	0	439	591	353	201	2e-51	200
19686_Transcript_1/1_Confidence_1.000_Length_609_45	609	gi|87141623|gb|DY386234.1|DY386234	422	90.2	153	15	0	439	591	64	216	2e-51	200
19686_Transcript_1/1_Confidence_1.000_Length_609_45	609	gi|87144984|gb|DY389595.1|DY389595	283	88.24	170	14	6	439	605	15	181	7e-51	198
19686_Transcript_1/1_Confidence_1.000_Length_609_45	609	gi|87145791|gb|DY390402.1|DY390402	396	88.24	170	14	6	439	605	128	294	7e-51	198
19686_Transcript_1/1_Confidence_1.000_Length_609_45	609	gi|87145792|gb|DY390403.1|DY390403	388	88.24	170	14	6	439	605	253	87	7e-51	198
19686_Transcript_1/1_Confidence_1.000_Length_609_45	609	gi|87144807|gb|DY389418.1|DY389418	414	87.65	170	15	6	439	605	146	312	3e-49	193
19686_Transcript_1/1_Confidence_1.000_Length_609_45	609	gi|87144808|gb|DY389419.1|DY389419	422	87.65	170	15	6	439	605	268	102	3e-49	193
19686_Transcript_1/1_Confidence_1.000_Length_609_45	609	gi|87144985|gb|DY389596.1|DY389596	329	87.65	170	15	6	439	605	306	140	3e-49	193
19686_Transcript_1/1_Confidence_1.000_Length_609_45	609	gi|87147629|gb|DY392240.1|DY392240	332	87.65	170	15	6	439	605	64	230	3e-49	193
19686_Transcript_1/1_Confidence_1.000_Length_609_45	609	gi|87147630|gb|DY392241.1|DY392241	301	87.65	170	15	6	439	605	248	82	3e-49	193
19686_Transcript_1/1_Confidence_1.000_Length_609_45	609	gi|87148029|gb|DY392640.1|DY392640	738	87.73	163	19	1	445	607	53	214	4e-48	189
19686_Transcript_1/1_Confidence_1.000_Length_609_45	609	gi|87138313|gb|DY382924.1|DY382924	445	87.06	170	14	8	439	605	179	343	6e-47	185
19686_Transcript_1/1_Confidence_1.000_Length_609_45	609	gi|87138314|gb|DY382925.1|DY382925	444	87.06	170	14	8	439	605	266	102	6e-47	185
19686_Transcript_1/1_Confidence_1.000_Length_609_45	609	gi|87148389|gb|DY393000.1|DY393000	328	86.39	169	22	1	439	607	60	227	2e-46	183
19686_Transcript_1/1_Confidence_1.000_Length_609_45	609	gi|87148390|gb|DY393001.1|DY393001	354	86.39	169	22	1	439	607	262	95	2e-46	183
19686_Transcript_1/1_Confidence_1.000_Length_609_45	609	gi|87149046|gb|DY393657.1|DY393657	816	86.39	169	22	1	439	607	194	361	2e-46	183
19686_Transcript_1/1_Confidence_1.000_Length_609_45	609	gi|87150125|gb|DY394736.1|DY394736	597	86.39	169	22	1	439	607	279	446	2e-46	183
19686_Transcript_1/1_Confidence_1.000_Length_609_45	609	gi|87150126|gb|DY394737.1|DY394737	588	86.39	169	22	1	439	607	319	152	2e-46	183
19686_Transcript_1/1_Confidence_1.000_Length_609_45	609	gi|87139825|gb|DY384436.1|DY384436	596	85.8	169	23	1	439	607	266	433	1e-44	178
19686_Transcript_1/1_Confidence_1.000_Length_609_45	609	gi|87143202|gb|DY387813.1|DY387813	879	85.21	169	24	1	439	607	179	346	4e-43	172
19686_Transcript_1/1_Confidence_1.000_Length_609_45	609	gi|87149074|gb|DY393685.1|DY393685	821	84.12	170	24	3	439	607	680	513	1e-39	161
19686_Transcript_1/1_Confidence_1.000_Length_609_45	609	gi|87149074|gb|DY393685.1|DY393685	821	89.87	79	7	1	529	607	818	741	2e-21	100
19686_Transcript_1/1_Confidence_1.000_Length_609_45	609	gi|87143203|gb|DY387814.1|DY387814	413	86.39	147	19	1	439	584	266	412	3e-39	159
19686_Transcript_1/1_Confidence_1.000_Length_609_45	609	gi|87142086|gb|DY386697.1|DY386697	531	81.55	168	30	1	440	607	217	383	2e-32	137
19686_Transcript_1/1_Confidence_1.000_Length_609_45	609	gi|87143375|gb|DY387986.1|DY387986	356	90.91	77	6	1	531	607	348	273	6e-22	102
19686_Transcript_1/1_Confidence_1.000_Length_609_45	609	gi|87143455|gb|DY388066.1|DY388066	414	90.79	76	6	1	532	607	10	84	2e-21	100
19686_Transcript_1/1_Confidence_1.000_Length_609_45	609	gi|87149135|gb|DY393746.1|DY393746	821	90.67	75	7	0	531	605	821	747	2e-21	100
19686_Transcript_1/1_Confidence_1.000_Length_609_45	609	gi|87142760|gb|DY387371.1|DY387371	488	100	43	0	0	316	358	61	103	3e-15	80.5
1968_Transcript_1/3_Confidence_0.875_Length_2338_45	2338	gi|87146685|gb|DY391296.1|DY391296	829	98.67	830	10	1	995	1824	1	829	0	1472
1968_Transcript_1/3_Confidence_0.875_Length_2338_45	2338	gi|87146684|gb|DY391295.1|DY391295	750	98.9	730	8	0	1609	2338	750	21	0	1304
1968_Transcript_1/3_Confidence_0.875_Length_2338_45	2338	gi|87149036|gb|DY393647.1|DY393647	855	88.71	372	38	4	262	631	486	855	2e-126	451
1968_Transcript_1/3_Confidence_0.875_Length_2338_45	2338	gi|87149036|gb|DY393647.1|DY393647	855	93.2	206	14	0	1	206	277	482	6e-82	303
1968_Transcript_1/3_Confidence_0.875_Length_2338_45	2338	gi|87145169|gb|DY389780.1|DY389780	791	89.23	195	17	3	2009	2200	9	202	5e-63	241
1968_Transcript_1/3_Confidence_0.875_Length_2338_45	2338	gi|87143233|gb|DY387844.1|DY387844	520	82.65	196	19	12	2056	2239	516	324	1e-38	159
1972_Transcript_2/3_Confidence_0.600_Length_824_45	824	gi|87149429|gb|DY394040.1|DY394040	690	89.81	687	37	19	119	776	690	8	0	850
19740_Transcript_1/1_Confidence_1.000_Length_705_45	705	gi|87147183|gb|DY391794.1|DY391794	807	100	677	0	0	29	705	9	685	0	1251
19740_Transcript_1/1_Confidence_1.000_Length_705_45	705	gi|87147184|gb|DY391795.1|DY391795	869	99.82	560	1	0	146	705	869	310	0	1029
19740_Transcript_1/1_Confidence_1.000_Length_705_45	705	gi|87150474|gb|DY395085.1|DY395085	525	99.24	524	2	2	81	603	3	525	0	944
19757_Transcript_1/1_Confidence_1.000_Length_231_45	231	gi|87143248|gb|DY387859.1|DY387859	728	90.65	139	11	2	93	230	1	138	7e-47	183
19784_Transcript_1/1_Confidence_1.000_Length_941_45	941	gi|87149695|gb|DY394306.1|DY394306	837	98.91	829	9	0	14	842	9	837	0	1482
19784_Transcript_1/1_Confidence_1.000_Length_941_45	941	gi|87149696|gb|DY394307.1|DY394307	804	99.14	700	6	0	242	941	804	105	0	1260
19784_Transcript_1/1_Confidence_1.000_Length_941_45	941	gi|87145113|gb|DY389724.1|DY389724	574	79.37	412	66	17	40	441	52	454	7e-73	272
19784_Transcript_1/1_Confidence_1.000_Length_941_45	941	gi|87145366|gb|DY389977.1|DY389977	662	81.91	199	24	11	365	558	643	452	2e-38	158
19784_Transcript_1/1_Confidence_1.000_Length_941_45	941	gi|87146652|gb|DY391263.1|DY391263	739	88.52	61	5	2	485	544	224	283	7e-13	73.1
19789_Transcript_1/2_Confidence_1.000_Length_358_45	358	gi|87140790|gb|DY385401.1|DY385401	454	87.43	374	23	12	3	358	408	41	2e-114	409
19789_Transcript_1/2_Confidence_1.000_Length_358_45	358	gi|87140791|gb|DY385402.1|DY385402	467	86.13	375	25	15	3	358	24	390	1e-105	379
1981_Transcript_1/4_Confidence_0.667_Length_1235_45	1235	gi|87140019|gb|DY384630.1|DY384630	679	91	678	41	10	104	771	12	679	0	896
19820_Transcript_1/1_Confidence_1.000_Length_460_45	460	gi|87149593|gb|DY394204.1|DY394204	697	99.49	389	2	0	72	460	697	309	0	708
19820_Transcript_1/1_Confidence_1.000_Length_460_45	460	gi|87149594|gb|DY394205.1|DY394205	697	99.23	389	3	0	72	460	1	389	0	702
19820_Transcript_1/1_Confidence_1.000_Length_460_45	460	gi|87144530|gb|DY389141.1|DY389141	834	88.46	182	15	5	282	460	449	271	5e-56	215
19820_Transcript_1/1_Confidence_1.000_Length_460_45	460	gi|87145479|gb|DY390090.1|DY390090	766	88.46	182	15	5	282	460	513	691	5e-56	215
19820_Transcript_1/1_Confidence_1.000_Length_460_45	460	gi|87150196|gb|DY394807.1|DY394807	813	88.46	182	15	5	282	460	556	378	5e-56	215
19820_Transcript_1/1_Confidence_1.000_Length_460_45	460	gi|87150197|gb|DY394808.1|DY394808	869	88.46	182	15	5	282	460	313	491	5e-56	215
19820_Transcript_1/1_Confidence_1.000_Length_460_45	460	gi|87139221|gb|DY383832.1|DY383832	600	87.65	170	19	2	292	460	592	424	2e-50	196
19820_Transcript_1/1_Confidence_1.000_Length_460_45	460	gi|87139222|gb|DY383833.1|DY383833	742	87.65	170	19	2	292	460	237	405	2e-50	196
19820_Transcript_1/1_Confidence_1.000_Length_460_45	460	gi|87140185|gb|DY384796.1|DY384796	836	87.65	170	19	2	292	460	246	414	2e-50	196
19820_Transcript_1/1_Confidence_1.000_Length_460_45	460	gi|87140184|gb|DY384795.1|DY384795	619	87.13	171	18	4	292	460	467	299	9e-49	191
19820_Transcript_1/1_Confidence_1.000_Length_460_45	460	gi|87144173|gb|DY388784.1|DY388784	789	87.06	170	20	2	292	460	561	393	9e-49	191
19820_Transcript_1/1_Confidence_1.000_Length_460_45	460	gi|87140008|gb|DY384619.1|DY384619	509	87.06	170	19	3	292	460	274	107	3e-48	189
19820_Transcript_1/1_Confidence_1.000_Length_460_45	460	gi|87140009|gb|DY384620.1|DY384620	509	87.06	170	19	3	292	460	236	403	3e-48	189
19830_Transcript_1/1_Confidence_1.000_Length_378_45	378	gi|87149675|gb|DY394286.1|DY394286	608	99.46	371	1	1	8	378	107	476	0	673
19830_Transcript_1/1_Confidence_1.000_Length_378_45	378	gi|87149676|gb|DY394287.1|DY394287	624	99.46	371	1	1	8	378	502	133	0	673
19843_Transcript_1/2_Confidence_1.000_Length_861_45	861	gi|87143307|gb|DY387918.1|DY387918	676	86.98	553	68	4	228	778	124	674	2e-177	619
19851_Transcript_2/4_Confidence_0.700_Length_2674_45	2674	gi|87150188|gb|DY394799.1|DY394799	760	98.95	760	7	1	1268	2026	1	760	0	1358
19851_Transcript_2/4_Confidence_0.700_Length_2674_45	2674	gi|87150187|gb|DY394798.1|DY394798	738	98.5	666	9	1	2009	2674	738	74	0	1173
19881_Transcript_4/4_Confidence_0.538_Length_1161_45	1161	gi|87138886|gb|DY383497.1|DY383497	650	92.96	71	5	0	537	607	580	650	3e-22	104
1990_Transcript_1/2_Confidence_1.000_Length_2133_45	2133	gi|87141909|gb|DY386520.1|DY386520	249	95.93	221	7	2	1906	2125	30	249	4e-98	357
19914_Transcript_1/2_Confidence_1.000_Length_1783_45	1783	gi|87149950|gb|DY394561.1|DY394561	351	98.98	293	2	1	390	681	301	9	3e-148	523
19914_Transcript_1/2_Confidence_1.000_Length_1783_45	1783	gi|87149951|gb|DY394562.1|DY394562	354	97.59	290	6	1	393	681	57	346	7e-140	496
19942_Transcript_5/5_Confidence_0.600_Length_1491_45	1491	gi|87149159|gb|DY393770.1|DY393770	907	90.91	913	59	15	570	1477	907	14	0	1205
19942_Transcript_5/5_Confidence_0.600_Length_1491_45	1491	gi|87143043|gb|DY387654.1|DY387654	691	92.84	684	45	4	200	880	683	1	0	989
19942_Transcript_5/5_Confidence_0.600_Length_1491_45	1491	gi|87149158|gb|DY393769.1|DY393769	746	99.22	128	1	0	285	412	1	128	2e-60	231
19942_Transcript_5/5_Confidence_0.600_Length_1491_45	1491	gi|87142249|gb|DY386860.1|DY386860	360	98.15	54	1	0	908	961	328	275	2e-19	95.3
19977_Transcript_1/6_Confidence_0.500_Length_1028_45	1028	gi|87141607|gb|DY386218.1|DY386218	908	95.86	555	22	1	475	1028	908	354	0	896
19977_Transcript_1/6_Confidence_0.500_Length_1028_45	1028	gi|87141606|gb|DY386217.1|DY386217	711	95.54	493	20	2	467	957	219	711	0	787
19977_Transcript_1/6_Confidence_0.500_Length_1028_45	1028	gi|87141606|gb|DY386217.1|DY386217	711	97.63	211	3	2	190	399	13	222	2e-99	361
19977_Transcript_4/6_Confidence_0.500_Length_1052_45	1052	gi|87141607|gb|DY386218.1|DY386218	908	96.22	555	20	1	499	1052	908	354	0	907
19977_Transcript_4/6_Confidence_0.500_Length_1052_45	1052	gi|87141606|gb|DY386217.1|DY386217	711	95.94	493	18	2	491	981	219	711	0	798
19977_Transcript_4/6_Confidence_0.500_Length_1052_45	1052	gi|87141606|gb|DY386217.1|DY386217	711	97.63	211	3	2	190	399	13	222	2e-99	361
19977_Transcript_5/6_Confidence_0.429_Length_1112_45	1112	gi|87141606|gb|DY386217.1|DY386217	711	96.51	544	17	2	190	732	13	555	0	898
19977_Transcript_5/6_Confidence_0.429_Length_1112_45	1112	gi|87141606|gb|DY386217.1|DY386217	711	96.84	158	3	2	886	1041	554	711	5e-70	263
19977_Transcript_5/6_Confidence_0.429_Length_1112_45	1112	gi|87141607|gb|DY386218.1|DY386218	908	95.15	330	15	1	404	732	908	579	3e-147	520
19977_Transcript_5/6_Confidence_0.429_Length_1112_45	1112	gi|87141607|gb|DY386218.1|DY386218	908	97.8	227	5	0	886	1112	580	354	6e-109	392
19997_Transcript_1/2_Confidence_1.000_Length_773_45	773	gi|87138960|gb|DY383571.1|DY383571	702	91.22	410	30	6	105	511	3	409	2e-157	553
19997_Transcript_1/2_Confidence_1.000_Length_773_45	773	gi|87138960|gb|DY383571.1|DY383571	702	91.73	266	12	9	510	767	437	700	1e-99	361
19997_Transcript_1/2_Confidence_1.000_Length_773_45	773	gi|87138961|gb|DY383572.1|DY383572	820	91.23	342	24	6	173	511	820	482	1e-129	460
19997_Transcript_1/2_Confidence_1.000_Length_773_45	773	gi|87138961|gb|DY383572.1|DY383572	820	92.08	265	13	7	510	767	454	191	2e-101	366
2001_Transcript_1/1_Confidence_1.000_Length_2295_45	2295	gi|87140900|gb|DY385511.1|DY385511	477	89.53	468	43	6	263	727	13	477	1e-167	588
2001_Transcript_1/1_Confidence_1.000_Length_2295_45	2295	gi|87140901|gb|DY385512.1|DY385512	470	88.98	463	44	7	263	722	459	1	7e-161	566
2001_Transcript_1/1_Confidence_1.000_Length_2295_45	2295	gi|87140620|gb|DY385231.1|DY385231	423	88.73	408	44	2	1603	2009	423	17	2e-140	497
2001_Transcript_1/1_Confidence_1.000_Length_2295_45	2295	gi|87139398|gb|DY384009.1|DY384009	739	77.89	701	127	28	592	1278	1	687	3e-114	411
20027_Transcript_1/1_Confidence_1.000_Length_263_45	263	gi|87147095|gb|DY391706.1|DY391706	765	97.72	263	3	3	1	262	483	223	8e-127	449
20027_Transcript_1/1_Confidence_1.000_Length_263_45	263	gi|87147921|gb|DY392532.1|DY392532	702	97.72	263	3	3	1	262	477	217	8e-127	449
20077_Transcript_1/1_Confidence_1.000_Length_290_45	290	gi|87142732|gb|DY387343.1|DY387343	476	99.31	290	2	0	1	290	24	313	1e-149	525
20077_Transcript_1/1_Confidence_1.000_Length_290_45	290	gi|87143116|gb|DY387727.1|DY387727	668	99.31	290	2	0	1	290	30	319	1e-149	525
20163_Transcript_1/1_Confidence_1.000_Length_252_45	252	gi|87146568|gb|DY391179.1|DY391179	842	96.3	216	6	2	38	252	1	215	6e-98	353
20163_Transcript_1/1_Confidence_1.000_Length_252_45	252	gi|87140456|gb|DY385067.1|DY385067	537	87.44	199	18	6	55	252	514	322	2e-58	222
20165_Transcript_2/3_Confidence_0.667_Length_875_45	875	gi|87142179|gb|DY386790.1|DY386790	845	97.58	825	20	0	1	825	826	2	0	1413
20165_Transcript_2/3_Confidence_0.667_Length_875_45	875	gi|87138865|gb|DY383476.1|DY383476	738	96.12	721	25	3	102	820	727	8	0	1173
20165_Transcript_2/3_Confidence_0.667_Length_875_45	875	gi|87145775|gb|DY390386.1|DY390386	828	98.01	502	10	0	331	832	502	1	0	872
20165_Transcript_2/3_Confidence_0.667_Length_875_45	875	gi|87145775|gb|DY390386.1|DY390386	828	96.88	256	3	5	88	338	826	571	2e-118	424
20165_Transcript_2/3_Confidence_0.667_Length_875_45	875	gi|87138864|gb|DY383475.1|DY383475	613	98.53	407	6	0	102	508	207	613	0	719
20165_Transcript_2/3_Confidence_0.667_Length_875_45	875	gi|87142182|gb|DY386793.1|DY386793	790	98.4	376	5	1	1	375	414	789	0	660
20165_Transcript_2/3_Confidence_0.667_Length_875_45	875	gi|87142854|gb|DY387465.1|DY387465	808	79.72	508	69	24	28	527	214	695	2e-92	337
20165_Transcript_2/3_Confidence_0.667_Length_875_45	875	gi|87145776|gb|DY390387.1|DY390387	730	97.89	95	2	0	1	95	636	730	1e-40	165
20165_Transcript_2/3_Confidence_0.667_Length_875_45	875	gi|87148745|gb|DY393356.1|DY393356	447	89.09	110	10	2	419	527	13	121	8e-32	135
20165_Transcript_2/3_Confidence_0.667_Length_875_45	875	gi|87148746|gb|DY393357.1|DY393357	434	89.09	110	10	2	419	527	422	314	8e-32	135
20217_Transcript_1/1_Confidence_1.000_Length_316_45	316	gi|87148230|gb|DY392841.1|DY392841	787	92.45	53	1	3	1	52	696	746	2e-13	73.1
20217_Transcript_1/1_Confidence_1.000_Length_316_45	316	gi|87148231|gb|DY392842.1|DY392842	863	92.45	53	1	3	1	52	190	140	2e-13	73.1
20231_Transcript_1/1_Confidence_1.000_Length_238_45	238	gi|87142343|gb|DY386954.1|DY386954	755	90.98	122	7	4	113	233	32	150	4e-40	161
20260_Transcript_1/1_Confidence_1.000_Length_210_45	210	gi|87142893|gb|DY387504.1|DY387504	330	98.41	63	1	0	4	66	330	268	3e-25	111
20303_Transcript_1/2_Confidence_1.000_Length_736_45	736	gi|87141601|gb|DY386212.1|DY386212	726	86.32	446	55	6	142	584	174	616	8e-136	481
20303_Transcript_1/2_Confidence_1.000_Length_736_45	736	gi|87141602|gb|DY386213.1|DY386213	822	86.32	446	55	6	142	584	710	268	8e-136	481
20303_Transcript_1/2_Confidence_1.000_Length_736_45	736	gi|87141901|gb|DY386512.1|DY386512	850	83.86	446	66	6	142	584	628	186	2e-117	420
20303_Transcript_1/2_Confidence_1.000_Length_736_45	736	gi|87141968|gb|DY386579.1|DY386579	854	83.86	446	66	6	142	584	554	112	2e-117	420
20303_Transcript_1/2_Confidence_1.000_Length_736_45	736	gi|87143020|gb|DY387631.1|DY387631	659	83.18	446	65	7	142	584	612	174	2e-111	399
20303_Transcript_1/2_Confidence_1.000_Length_736_45	736	gi|87143021|gb|DY387632.1|DY387632	628	82.99	441	65	7	147	584	28	461	1e-108	390
2031_Transcript_2/5_Confidence_0.545_Length_951_45	951	gi|87150480|gb|DY395091.1|DY395091	924	84.69	601	64	23	1	593	222	802	5e-164	575
2031_Transcript_2/5_Confidence_0.545_Length_951_45	951	gi|87150481|gb|DY395092.1|DY395092	776	84.67	600	65	22	1	593	742	163	2e-163	573
2031_Transcript_2/5_Confidence_0.545_Length_951_45	951	gi|87145014|gb|DY389625.1|DY389625	818	87.85	469	46	11	133	595	818	355	2e-153	540
2031_Transcript_2/5_Confidence_0.545_Length_951_45	951	gi|87142319|gb|DY386930.1|DY386930	648	90.21	388	32	6	163	547	241	625	8e-142	501
2031_Transcript_2/5_Confidence_0.545_Length_951_45	951	gi|87142316|gb|DY386927.1|DY386927	727	88.56	402	35	11	200	596	727	332	1e-134	477
2031_Transcript_5/5_Confidence_0.455_Length_1074_45	1074	gi|87145014|gb|DY389625.1|DY389625	818	99.27	818	3	2	133	949	818	3	0	1474
2031_Transcript_5/5_Confidence_0.455_Length_1074_45	1074	gi|87150481|gb|DY395092.1|DY395092	776	89.79	607	46	11	1	605	742	150	0	763
2031_Transcript_5/5_Confidence_0.455_Length_1074_45	1074	gi|87150480|gb|DY395091.1|DY395091	924	89.64	608	46	12	1	605	222	815	0	758
2031_Transcript_5/5_Confidence_0.455_Length_1074_45	1074	gi|87142319|gb|DY386930.1|DY386930	648	87.65	413	40	11	163	569	241	648	3e-132	470
2031_Transcript_5/5_Confidence_0.455_Length_1074_45	1074	gi|87142316|gb|DY386927.1|DY386927	727	87.78	401	38	11	200	594	727	332	5e-129	459
2032_Transcript_1/4_Confidence_0.667_Length_678_45	678	gi|87147048|gb|DY391659.1|DY391659	472	99.57	468	2	0	152	619	468	1	0	854
2032_Transcript_1/4_Confidence_0.667_Length_678_45	678	gi|87147049|gb|DY391660.1|DY391660	490	99.35	459	1	2	163	620	1	458	0	830
20368_Transcript_1/2_Confidence_1.000_Length_621_45	621	gi|87145239|gb|DY389850.1|DY389850	569	99.47	567	3	0	4	570	569	3	0	1031
20368_Transcript_1/2_Confidence_1.000_Length_621_45	621	gi|87145240|gb|DY389851.1|DY389851	574	98.06	567	10	1	4	570	1	566	0	985
20402_Transcript_3/4_Confidence_0.625_Length_707_45	707	gi|87150178|gb|DY394789.1|DY394789	626	98.51	536	8	0	1	536	28	563	0	946
20402_Transcript_3/4_Confidence_0.625_Length_707_45	707	gi|87150178|gb|DY394789.1|DY394789	626	95.38	65	3	0	626	690	562	626	2e-22	104
20402_Transcript_3/4_Confidence_0.625_Length_707_45	707	gi|87147320|gb|DY391931.1|DY391931	682	98.33	540	5	3	1	536	10	549	0	944
20402_Transcript_3/4_Confidence_0.625_Length_707_45	707	gi|87147320|gb|DY391931.1|DY391931	682	97.56	82	2	0	626	707	548	629	1e-33	141
20402_Transcript_3/4_Confidence_0.625_Length_707_45	707	gi|87147321|gb|DY391932.1|DY391932	799	98.15	540	6	3	1	536	784	245	0	939
20402_Transcript_3/4_Confidence_0.625_Length_707_45	707	gi|87147321|gb|DY391932.1|DY391932	799	97.56	82	2	0	626	707	246	165	1e-33	141
20402_Transcript_3/4_Confidence_0.625_Length_707_45	707	gi|87150177|gb|DY394788.1|DY394788	785	99.48	382	0	2	156	536	784	404	0	693
20402_Transcript_3/4_Confidence_0.625_Length_707_45	707	gi|87150177|gb|DY394788.1|DY394788	785	100	82	0	0	626	707	405	324	7e-37	152
20423_Transcript_2/2_Confidence_1.000_Length_821_45	821	gi|87149663|gb|DY394274.1|DY394274	794	97.86	794	6	7	26	817	794	10	0	1362
20423_Transcript_2/2_Confidence_1.000_Length_821_45	821	gi|87149664|gb|DY394275.1|DY394275	711	97.84	694	5	6	2	693	26	711	0	1190
20423_Transcript_2/2_Confidence_1.000_Length_821_45	821	gi|87149111|gb|DY393722.1|DY393722	829	89.2	787	41	20	12	797	780	37	0	942
20423_Transcript_2/2_Confidence_1.000_Length_821_45	821	gi|87149112|gb|DY393723.1|DY393723	783	89.16	766	41	18	12	777	58	781	0	917
20423_Transcript_2/2_Confidence_1.000_Length_821_45	821	gi|87149681|gb|DY394292.1|DY394292	819	100	303	0	0	201	503	526	224	1e-159	560
20423_Transcript_2/2_Confidence_1.000_Length_821_45	821	gi|87149681|gb|DY394292.1|DY394292	819	99.01	203	1	1	4	205	808	606	3e-100	363
20423_Transcript_2/2_Confidence_1.000_Length_821_45	821	gi|87149682|gb|DY394293.1|DY394293	828	100	303	0	0	201	503	308	610	1e-159	560
20423_Transcript_2/2_Confidence_1.000_Length_821_45	821	gi|87149682|gb|DY394293.1|DY394293	828	100	199	0	0	7	205	30	228	7e-102	368
2043_Transcript_1/5_Confidence_0.500_Length_1541_45	1541	gi|87148631|gb|DY393242.1|DY393242	681	99.77	433	0	1	1022	1454	1	432	0	793
2043_Transcript_1/5_Confidence_0.500_Length_1541_45	1541	gi|87148632|gb|DY393243.1|DY393243	700	99.77	433	0	1	1022	1454	668	237	0	793
2045_Transcript_1/2_Confidence_1.000_Length_609_45	609	gi|87139474|gb|DY384085.1|DY384085	713	90.91	88	6	2	94	180	597	683	2e-26	117
2045_Transcript_1/2_Confidence_1.000_Length_609_45	609	gi|87139475|gb|DY384086.1|DY384086	800	90.91	88	6	2	94	180	511	425	2e-26	117
2045_Transcript_2/2_Confidence_1.000_Length_330_45	330	gi|87139475|gb|DY384086.1|DY384086	800	90.83	120	9	2	94	212	511	393	2e-39	159
2045_Transcript_2/2_Confidence_1.000_Length_330_45	330	gi|87139474|gb|DY384085.1|DY384085	713	90.68	118	9	2	94	210	597	713	2e-38	156
20554_Transcript_1/1_Confidence_1.000_Length_448_45	448	gi|87145055|gb|DY389666.1|DY389666	753	99.33	448	3	0	1	448	459	12	0	811
20554_Transcript_1/1_Confidence_1.000_Length_448_45	448	gi|87150338|gb|DY394949.1|DY394949	669	99.33	446	3	0	1	446	224	669	0	808
20554_Transcript_1/1_Confidence_1.000_Length_448_45	448	gi|87147720|gb|DY392331.1|DY392331	802	98.21	448	8	0	1	448	353	800	0	784
20554_Transcript_1/1_Confidence_1.000_Length_448_45	448	gi|87144254|gb|DY388865.1|DY388865	746	98.42	442	7	0	1	442	442	1	0	778
20554_Transcript_1/1_Confidence_1.000_Length_448_45	448	gi|87150582|gb|DY395193.1|DY395193	735	97.77	449	9	1	1	448	454	6	0	773
20554_Transcript_1/1_Confidence_1.000_Length_448_45	448	gi|87147735|gb|DY392346.1|DY392346	752	97.9	428	7	2	1	427	429	3	0	739
20554_Transcript_1/1_Confidence_1.000_Length_448_45	448	gi|87148785|gb|DY393396.1|DY393396	832	97.89	427	9	0	1	427	430	4	0	739
20554_Transcript_1/1_Confidence_1.000_Length_448_45	448	gi|87149156|gb|DY393767.1|DY393767	788	97.06	442	1	4	1	442	72	501	0	734
20554_Transcript_1/1_Confidence_1.000_Length_448_45	448	gi|87143542|gb|DY388153.1|DY388153	492	97.21	430	0	4	1	430	75	492	0	717
20554_Transcript_1/1_Confidence_1.000_Length_448_45	448	gi|87144997|gb|DY389608.1|DY389608	908	96.5	428	3	4	1	428	416	1	0	697
20554_Transcript_1/1_Confidence_1.000_Length_448_45	448	gi|87143545|gb|DY388156.1|DY388156	493	95.82	431	5	5	1	430	419	1	0	684
20554_Transcript_1/1_Confidence_1.000_Length_448_45	448	gi|87150300|gb|DY394911.1|DY394911	776	97.96	392	8	0	1	392	393	2	0	680
20554_Transcript_1/1_Confidence_1.000_Length_448_45	448	gi|87147982|gb|DY392593.1|DY392593	821	98.43	382	6	0	1	382	382	1	0	673
20554_Transcript_1/1_Confidence_1.000_Length_448_45	448	gi|87141045|gb|DY385656.1|DY385656	597	93.58	452	23	5	1	448	461	12	0	669
20554_Transcript_1/1_Confidence_1.000_Length_448_45	448	gi|87144252|gb|DY388863.1|DY388863	450	94.96	417	9	4	2	418	405	1	0	643
20554_Transcript_1/1_Confidence_1.000_Length_448_45	448	gi|87145056|gb|DY389667.1|DY389667	887	99.16	357	2	1	1	356	531	887	0	641
20554_Transcript_1/1_Confidence_1.000_Length_448_45	448	gi|87145573|gb|DY390184.1|DY390184	674	92.72	426	12	10	1	423	410	1	5e-171	597
20554_Transcript_1/1_Confidence_1.000_Length_448_45	448	gi|87140650|gb|DY385261.1|DY385261	465	94.13	375	20	2	1	374	92	465	1e-162	569
20554_Transcript_1/1_Confidence_1.000_Length_448_45	448	gi|87140651|gb|DY385262.1|DY385262	464	93.32	374	23	2	1	373	373	1	4e-157	551
20554_Transcript_1/1_Confidence_1.000_Length_448_45	448	gi|87150249|gb|DY394860.1|DY394860	787	95.95	346	2	4	1	346	340	7	4e-157	551
20554_Transcript_1/1_Confidence_1.000_Length_448_45	448	gi|87148486|gb|DY393097.1|DY393097	441	96.14	311	0	4	124	434	14	312	5e-141	497
20554_Transcript_1/1_Confidence_1.000_Length_448_45	448	gi|87148784|gb|DY393395.1|DY393395	827	97.86	281	4	2	1	280	545	824	4e-137	484
20554_Transcript_1/1_Confidence_1.000_Length_448_45	448	gi|87147596|gb|DY392207.1|DY392207	854	97.12	278	4	4	1	276	579	854	1e-131	466
20554_Transcript_1/1_Confidence_1.000_Length_448_45	448	gi|87144996|gb|DY389607.1|DY389607	837	95.17	269	1	4	1	269	581	837	5e-116	414
20554_Transcript_1/1_Confidence_1.000_Length_448_45	448	gi|87150581|gb|DY395192.1|DY395192	818	98.29	234	4	0	1	234	585	818	6e-115	411
20554_Transcript_1/1_Confidence_1.000_Length_448_45	448	gi|87150299|gb|DY394910.1|DY394910	828	98.28	233	3	1	1	232	595	827	8e-114	407
20554_Transcript_1/1_Confidence_1.000_Length_448_45	448	gi|87144253|gb|DY388864.1|DY388864	792	97.78	225	3	2	1	224	569	792	1e-107	387
20554_Transcript_1/1_Confidence_1.000_Length_448_45	448	gi|87150248|gb|DY394859.1|DY394859	795	100	197	0	0	1	197	597	793	5e-101	364
20554_Transcript_1/1_Confidence_1.000_Length_448_45	448	gi|87141453|gb|DY386064.1|DY386064	790	90.71	269	20	5	1	266	367	101	1e-97	353
20554_Transcript_1/1_Confidence_1.000_Length_448_45	448	gi|87142269|gb|DY386880.1|DY386880	747	90.71	269	20	5	1	266	312	46	1e-97	353
20554_Transcript_1/1_Confidence_1.000_Length_448_45	448	gi|87147734|gb|DY392345.1|DY392345	759	98.47	196	3	0	1	196	564	759	2e-95	346
20554_Transcript_1/1_Confidence_1.000_Length_448_45	448	gi|87148819|gb|DY393430.1|DY393430	764	86.54	312	32	9	1	309	381	77	4e-92	335
20554_Transcript_1/1_Confidence_1.000_Length_448_45	448	gi|87147576|gb|DY392187.1|DY392187	754	86.26	313	31	11	1	309	355	51	2e-90	329
20554_Transcript_1/1_Confidence_1.000_Length_448_45	448	gi|87148546|gb|DY393157.1|DY393157	790	86.26	313	31	11	1	309	367	63	2e-90	329
20554_Transcript_1/1_Confidence_1.000_Length_448_45	448	gi|87149403|gb|DY394014.1|DY394014	809	86.26	313	31	11	1	309	352	48	2e-90	329
20554_Transcript_1/1_Confidence_1.000_Length_448_45	448	gi|87139793|gb|DY384404.1|DY384404	803	88.85	269	25	5	1	266	349	83	2e-89	326
20554_Transcript_1/1_Confidence_1.000_Length_448_45	448	gi|87141455|gb|DY386066.1|DY386066	731	88.85	269	25	5	1	266	367	101	2e-89	326
20554_Transcript_1/1_Confidence_1.000_Length_448_45	448	gi|87146412|gb|DY391023.1|DY391023	783	88.76	267	29	1	1	266	387	121	2e-89	326
20554_Transcript_1/1_Confidence_1.000_Length_448_45	448	gi|87147074|gb|DY391685.1|DY391685	873	88.76	267	29	1	1	266	379	113	2e-89	326
20554_Transcript_1/1_Confidence_1.000_Length_448_45	448	gi|87148500|gb|DY393111.1|DY393111	787	88.76	267	29	1	1	266	361	95	2e-89	326
20554_Transcript_1/1_Confidence_1.000_Length_448_45	448	gi|87149929|gb|DY394540.1|DY394540	775	88.76	267	29	1	1	266	410	144	2e-89	326
20554_Transcript_1/1_Confidence_1.000_Length_448_45	448	gi|87149930|gb|DY394541.1|DY394541	837	88.76	267	29	1	1	266	529	795	2e-89	326
20554_Transcript_1/1_Confidence_1.000_Length_448_45	448	gi|87150649|gb|DY395260.1|DY395260	735	88.76	267	29	1	1	266	311	45	2e-89	326
20554_Transcript_1/1_Confidence_1.000_Length_448_45	448	gi|87139443|gb|DY384054.1|DY384054	790	85.9	312	34	9	1	309	351	47	8e-89	324
20554_Transcript_1/1_Confidence_1.000_Length_448_45	448	gi|87142037|gb|DY386648.1|DY386648	814	85.9	312	34	9	1	309	441	137	8e-89	324
20554_Transcript_1/1_Confidence_1.000_Length_448_45	448	gi|87146566|gb|DY391177.1|DY391177	475	85.94	313	32	11	1	309	425	121	8e-89	324
20554_Transcript_1/1_Confidence_1.000_Length_448_45	448	gi|87147035|gb|DY391646.1|DY391646	810	85.9	312	34	9	1	309	437	133	8e-89	324
20554_Transcript_1/1_Confidence_1.000_Length_448_45	448	gi|87148378|gb|DY392989.1|DY392989	877	85.9	312	34	9	1	309	568	872	8e-89	324
20554_Transcript_1/1_Confidence_1.000_Length_448_45	448	gi|87150219|gb|DY394830.1|DY394830	518	85.9	312	34	9	1	309	387	83	8e-89	324
20554_Transcript_1/1_Confidence_1.000_Length_448_45	448	gi|87150220|gb|DY394831.1|DY394831	512	85.9	312	34	9	1	309	126	430	8e-89	324
20554_Transcript_1/1_Confidence_1.000_Length_448_45	448	gi|87150675|gb|DY395286.1|DY395286	799	85.9	312	34	9	1	309	371	67	8e-89	324
20554_Transcript_1/1_Confidence_1.000_Length_448_45	448	gi|87146199|gb|DY390810.1|DY390810	752	88.39	267	30	1	1	266	333	67	1e-87	320
20554_Transcript_1/1_Confidence_1.000_Length_448_45	448	gi|87144251|gb|DY388862.1|DY388862	766	98.31	178	3	0	1	178	589	766	2e-85	313
20554_Transcript_1/1_Confidence_1.000_Length_448_45	448	gi|87145572|gb|DY390183.1|DY390183	766	98.25	171	2	1	1	171	597	766	5e-81	298
20554_Transcript_1/1_Confidence_1.000_Length_448_45	448	gi|87149402|gb|DY394013.1|DY394013	816	88.84	242	23	4	1	240	576	815	7e-80	294
20554_Transcript_1/1_Confidence_1.000_Length_448_45	448	gi|87146565|gb|DY391176.1|DY391176	803	88.61	237	23	4	1	235	569	803	4e-77	285
20554_Transcript_1/1_Confidence_1.000_Length_448_45	448	gi|87146970|gb|DY391581.1|DY391581	497	85.77	274	31	7	38	309	1	268	1e-76	283
20554_Transcript_1/1_Confidence_1.000_Length_448_45	448	gi|87150674|gb|DY395285.1|DY395285	794	88.51	235	25	2	1	234	561	794	1e-76	283
20554_Transcript_1/1_Confidence_1.000_Length_448_45	448	gi|87148499|gb|DY393110.1|DY393110	809	87.66	235	27	2	1	234	576	809	3e-73	272
20554_Transcript_1/1_Confidence_1.000_Length_448_45	448	gi|87147981|gb|DY392592.1|DY392592	732	98.52	135	2	0	1	135	598	732	3e-63	239
20554_Transcript_1/1_Confidence_1.000_Length_448_45	448	gi|87150648|gb|DY395259.1|DY395259	770	87.06	201	26	0	1	201	570	770	7e-60	228
20554_Transcript_1/1_Confidence_1.000_Length_448_45	448	gi|87141959|gb|DY386570.1|DY386570	755	87.7	187	21	2	1	186	570	755	1e-56	217
20554_Transcript_1/1_Confidence_1.000_Length_448_45	448	gi|87145463|gb|DY390074.1|DY390074	758	87.17	187	22	2	1	186	573	758	7e-55	211
20554_Transcript_1/1_Confidence_1.000_Length_448_45	448	gi|87146411|gb|DY391022.1|DY391022	740	87.93	174	21	0	1	174	561	734	3e-53	206
20554_Transcript_1/1_Confidence_1.000_Length_448_45	448	gi|87147575|gb|DY392186.1|DY392186	740	88.07	176	17	4	1	174	564	737	3e-53	206
20554_Transcript_1/1_Confidence_1.000_Length_448_45	448	gi|87144831|gb|DY389442.1|DY389442	482	83.11	225	31	5	29	248	37	259	5e-51	198
20554_Transcript_1/1_Confidence_1.000_Length_448_45	448	gi|87144832|gb|DY389443.1|DY389443	491	83.11	225	31	5	29	248	446	224	5e-51	198
20554_Transcript_1/1_Confidence_1.000_Length_448_45	448	gi|87139210|gb|DY383821.1|DY383821	706	91.67	96	6	2	172	266	207	113	5e-31	132
20565_Transcript_1/1_Confidence_1.000_Length_679_45	679	gi|87145203|gb|DY389814.1|DY389814	755	97.74	575	7	5	106	679	3	572	0	985
20565_Transcript_1/1_Confidence_1.000_Length_679_45	679	gi|87149517|gb|DY394128.1|DY394128	806	97.39	575	8	6	106	679	9	577	0	972
20606_Transcript_1/2_Confidence_1.000_Length_1550_45	1550	gi|87145976|gb|DY390587.1|DY390587	728	99.44	360	2	0	182	541	27	386	0	654
20606_Transcript_1/2_Confidence_1.000_Length_1550_45	1550	gi|87145977|gb|DY390588.1|DY390588	751	100	188	0	0	540	727	188	1	2e-95	348
20607_Transcript_1/1_Confidence_1.000_Length_238_45	238	gi|87145699|gb|DY390310.1|DY390310	407	96.27	241	5	1	2	238	294	54	1e-109	392
20607_Transcript_1/1_Confidence_1.000_Length_238_45	238	gi|87145700|gb|DY390311.1|DY390311	406	96.27	241	5	1	2	238	113	353	1e-109	392
2061_Transcript_2/4_Confidence_0.667_Length_1315_45	1315	gi|87142177|gb|DY386788.1|DY386788	825	94.28	542	28	2	730	1271	557	19	0	826
2061_Transcript_2/4_Confidence_0.667_Length_1315_45	1315	gi|87142177|gb|DY386788.1|DY386788	825	93.7	270	17	0	381	650	825	556	9e-113	405
2061_Transcript_2/4_Confidence_0.667_Length_1315_45	1315	gi|87142174|gb|DY386785.1|DY386785	840	97.23	361	10	0	730	1090	480	840	1e-175	614
2061_Transcript_2/4_Confidence_0.667_Length_1315_45	1315	gi|87142174|gb|DY386785.1|DY386785	840	90.02	461	35	7	200	650	22	481	3e-167	586
2061_Transcript_3/4_Confidence_0.667_Length_1234_45	1234	gi|87142177|gb|DY386788.1|DY386788	825	94.2	810	44	2	381	1190	825	19	0	1232
2061_Transcript_3/4_Confidence_0.667_Length_1234_45	1234	gi|87142174|gb|DY386785.1|DY386785	840	93.29	820	44	7	200	1009	22	840	0	1201
20629_Transcript_1/1_Confidence_1.000_Length_1600_45	1600	gi|87150251|gb|DY394862.1|DY394862	842	100	86	0	0	508	593	183	98	9e-39	159
206_Transcript_3/4_Confidence_0.538_Length_1370_45	1370	gi|87140230|gb|DY384841.1|DY384841	810	98.14	808	12	3	542	1346	810	3	0	1406
206_Transcript_3/4_Confidence_0.538_Length_1370_45	1370	gi|87139606|gb|DY384217.1|DY384217	786	98.22	787	11	3	565	1349	786	1	0	1373
206_Transcript_3/4_Confidence_0.538_Length_1370_45	1370	gi|87139605|gb|DY384216.1|DY384216	752	99.07	752	7	0	41	792	1	752	0	1351
206_Transcript_3/4_Confidence_0.538_Length_1370_45	1370	gi|87140229|gb|DY384840.1|DY384840	644	98.9	639	7	0	41	679	6	644	0	1142
20740_Transcript_1/1_Confidence_1.000_Length_500_45	500	gi|87146241|gb|DY390852.1|DY390852	654	84.03	119	10	5	391	500	415	533	4e-23	106
20740_Transcript_1/1_Confidence_1.000_Length_500_45	500	gi|87146242|gb|DY390853.1|DY390853	631	84.03	119	10	5	391	500	217	99	4e-23	106
20740_Transcript_1/1_Confidence_1.000_Length_500_45	500	gi|87143954|gb|DY388565.1|DY388565	875	100	35	0	0	466	500	205	171	6e-11	65.8
20746_Transcript_3/5_Confidence_0.556_Length_863_45	863	gi|87142750|gb|DY387361.1|DY387361	661	90.59	510	48	0	349	858	661	152	0	676
20746_Transcript_3/5_Confidence_0.556_Length_863_45	863	gi|87142752|gb|DY387363.1|DY387363	679	92.08	480	36	2	241	718	200	679	0	675
20754_Transcript_1/1_Confidence_1.000_Length_887_45	887	gi|87138545|gb|DY383156.1|DY383156	807	93.8	403	18	5	488	884	446	45	3e-171	599
20754_Transcript_1/1_Confidence_1.000_Length_887_45	887	gi|87138545|gb|DY383156.1|DY383156	807	96.32	163	6	0	328	490	681	519	8e-72	268
20754_Transcript_1/1_Confidence_1.000_Length_887_45	887	gi|87140127|gb|DY384738.1|DY384738	897	93.8	403	18	5	488	884	446	45	3e-171	599
20754_Transcript_1/1_Confidence_1.000_Length_887_45	887	gi|87140127|gb|DY384738.1|DY384738	897	96.32	163	6	0	328	490	681	519	8e-72	268
20754_Transcript_1/1_Confidence_1.000_Length_887_45	887	gi|87140285|gb|DY384896.1|DY384896	802	93.56	404	17	7	488	884	445	44	1e-169	593
20754_Transcript_1/1_Confidence_1.000_Length_887_45	887	gi|87140285|gb|DY384896.1|DY384896	802	96.32	163	6	0	328	490	680	518	8e-72	268
20754_Transcript_1/1_Confidence_1.000_Length_887_45	887	gi|87138633|gb|DY383244.1|DY383244	870	97.81	320	7	0	10	329	1	320	2e-157	553
20754_Transcript_1/1_Confidence_1.000_Length_887_45	887	gi|87140126|gb|DY384737.1|DY384737	644	97.81	320	7	0	10	329	1	320	2e-157	553
20754_Transcript_1/1_Confidence_1.000_Length_887_45	887	gi|87140284|gb|DY384895.1|DY384895	755	97.81	320	7	0	10	329	1	320	2e-157	553
20799_Transcript_1/1_Confidence_1.000_Length_242_45	242	gi|87139737|gb|DY384348.1|DY384348	583	86.52	178	12	5	66	242	446	280	2e-47	185
20799_Transcript_1/1_Confidence_1.000_Length_242_45	242	gi|87139738|gb|DY384349.1|DY384349	616	86.52	178	12	5	66	242	139	305	2e-47	185
20882_Transcript_1/2_Confidence_1.000_Length_586_45	586	gi|87146921|gb|DY391532.1|DY391532	861	100	436	0	0	1	436	394	829	0	806
20882_Transcript_1/2_Confidence_1.000_Length_586_45	586	gi|87149391|gb|DY394002.1|DY394002	857	100	436	0	0	1	436	391	826	0	806
20882_Transcript_1/2_Confidence_1.000_Length_586_45	586	gi|87149390|gb|DY394001.1|DY394001	754	100	434	0	0	1	434	434	1	0	802
20882_Transcript_1/2_Confidence_1.000_Length_586_45	586	gi|87146920|gb|DY391531.1|DY391531	660	99.77	434	1	0	1	434	434	1	0	797
20926_Transcript_1/1_Confidence_1.000_Length_545_45	545	gi|87148230|gb|DY392841.1|DY392841	787	96.3	216	5	3	38	253	525	737	5e-97	351
20926_Transcript_1/1_Confidence_1.000_Length_545_45	545	gi|87148231|gb|DY392842.1|DY392842	863	96.3	216	5	3	38	253	361	149	5e-97	351
20933_Transcript_1/1_Confidence_1.000_Length_339_45	339	gi|87150672|gb|DY395283.1|DY395283	776	91.86	295	6	6	62	339	3	296	1e-110	396
20933_Transcript_1/1_Confidence_1.000_Length_339_45	339	gi|87150671|gb|DY395282.1|DY395282	745	98.01	201	3	1	139	339	745	546	4e-96	348
[truncated: 36,450 more rows]
