# Supplementary material for: De Novo Transcriptome Assembly (NGS) of Curcuma longa L. Rhizome Reveals Novel Transcripts Related to Anticancer and Antimalarial Terpenoids
Source: PLoS One. 2013 Feb 28;8(2):e56217. doi: 10.1371/journal.pone.0056217 (PMC3585318; doi:10.1371/journal.pone.0056217)
Supplement: File S7 — Final table. The table lists the best annotation for each transcript. (XLS) [file pone.0056217.s007.xls]

## Sheet: Sheet1
Transcript ID	Transcript Length	Protein	Protein Length	% Identity	Alignment Length	Mismatches	Gaps	Transcript Start	Transcript End	Protein Start	Protein End	Evalue	Bit Score	Protein Description	Organism	Database
10004_Transcript_1/1_Confidence_1.000_Length_487_45	487	OPR4_ORYSJ	380	72.22	162	42	1	1	486	19	177	4e-68	253	Full=Putative 12-oxophytodienoate reductase 4;	Oryza sativa subsp. japonica (Rice).	Swiss-Prot
10013_Transcript_1/1_Confidence_1.000_Length_819_45	819	RKF1_ARATH	1021	37.5	208	116	2	809	222	747	952	2e-34	142	Full=Probable LRR receptor-like serine/threonine-protein kinase RFK1;	Arabidopsis thaliana (Mouse-ear cress).	Swiss-Prot
10017_Transcript_1/2_Confidence_1.000_Length_3743_45	3743	NMCP_ARATH	1042	40.75	957	508	12	99	2804	13	965	1e-152	538	Full=Putative nuclear matrix constituent protein 1-like protein;	Arabidopsis thaliana (Mouse-ear cress).	Swiss-Prot
10023_Transcript_1/1_Confidence_1.000_Length_567_45	567	G7LF38_MEDTR	116	39.71	68	41	0	522	319	22	89	2e-06	53.1		Medicago truncatula (Barrel medic) (Medicago tribuloides).	TrEMBL
10026_Transcript_8/10_Confidence_0.452_Length_1387_45	1387	At1g72710	465	82.28	378	62	3	213	1343	1	374	4e-179	626	[T] KOG1164 Casein kinase (serine/threonine/tyrosine protein kinase)		KOG
10035_Transcript_1/2_Confidence_1.000_Length_2495_45	2495	IQD32_ARATH	794	31.31	725	412	23	2334	217	137	794	6e-64	242	Full=Protein IQ-DOMAIN 32;	Arabidopsis thaliana (Mouse-ear cress).	Swiss-Prot
10042_Transcript_1/2_Confidence_1.000_Length_1108_45	1108	LOC_OS06G12630_PlantCyc_LOC_OS06G12630.1-MONOMER	272	76.07	234	53	1	85	786	40	270	7e-103	368	0	0	PlantCyc
10044_Transcript_1/1_Confidence_1.000_Length_1108_45	1108	At4g02730	333	67.62	315	102	0	1088	144	17	331	2e-132	470	[R] KOG0266 WD40 repeat-containing protein		KOG
10046_Transcript_3/4_Confidence_0.667_Length_718_45	718	R27AA_ORYSJ	155	97.26	146	4	0	718	281	8	153	7e-65	243	Full=Ubiquitin-40S ribosomal protein S27a-1;	Oryza sativa subsp. japonica (Rice).	Swiss-Prot
10056_Transcript_1/1_Confidence_1.000_Length_832_45	832	C5XDD5_SORBI	732	34.9	192	125	0	128	703	533	724	1e-28	127		Sorghum bicolor (Sorghum) (Sorghum vulgare).	TrEMBL
10058_Transcript_2/5_Confidence_0.714_Length_1771_45	1771	LOC_OS01G08270_PlantCyc_LOC_OS01G08270.1-MONOMER	394	72.31	242	66	1	982	260	153	394	1e-106	381	0	0	PlantCyc
10058_Transcript_4/5_Confidence_0.714_Length_2182_45	2182	SGN-U567390_PlantCyc_SGN-U320089-MONOMER	391	75	208	51	1	2003	1383	1	208	3e-88	321	ASPARTATE AMINOTRANSFERASE	Solanum lycopersicum	PlantCyc
10060_Transcript_1/1_Confidence_1.000_Length_386_45	386	F2CPP2_HORVD	224	51.25	80	28	2	38	244	133	212	6e-08	57.4		Hordeum vulgare var. distichum (Two-rowed barley).	TrEMBL
10067_Transcript_2/3_Confidence_0.333_Length_1368_45	1368	F2EE68_HORVD	362	61.54	325	117	6	1326	355	45	362	1e-89	331		Hordeum vulgare var. distichum (Two-rowed barley).	TrEMBL
1006_Transcript_1/1_Confidence_1.000_Length_465_45	465	A5C8R2_VITVI	590	51.52	33	16	0	345	443	197	229	3e-06	37		Vitis vinifera (Grape).	TrEMBL
10075_Transcript_1/2_Confidence_1.000_Length_1694_45	1694	LOC_OS01G20840_PlantCyc_LOC_OS01G20840.1-MONOMER	635	58.42	190	77	1	5	568	98	287	2e-103	214	0	0	PlantCyc
10076_Transcript_2/2_Confidence_1.000_Length_374_45	374	B6TLV4_MAIZE	78	66.67	57	19	0	4	174	10	66	1e-18	92.8		Zea mays (Maize).	TrEMBL
10081_Transcript_1/1_Confidence_1.000_Length_2150_45	2150	HSL1_ARATH	996	64.71	666	220	6	1	1959	331	994	0	802	Full=Receptor-like protein kinase HSL1;	Arabidopsis thaliana (Mouse-ear cress).	Swiss-Prot
10090_Transcript_1/1_Confidence_1.000_Length_1335_45	1335	B9GYH6_POPTR	354	68.62	239	73	2	1260	547	94	331	3e-87	323		Populus trichocarpa (Western balsam poplar) (Populus balsamifera subsp. trichocarpa).	TrEMBL
10101_Transcript_1/1_Confidence_1.000_Length_677_45	677	LOC_OS06G06250_PlantCyc_LOC_OS06G06250.1-MONOMER	360	60.92	87	24	3	445	675	20	106	2e-23	103	0	0	PlantCyc
10103_Transcript_2/4_Confidence_0.429_Length_739_45	739	LOC_OS03G60380_PlantCyc_LOC_OS03G60380.1-MONOMER	334	73.77	122	32	0	4	369	212	333	6e-49	188	0	0	PlantCyc
10120_Transcript_1/1_Confidence_1.000_Length_382_45	382	O23864_9ORYZ	1317	71.43	35	10	0	200	96	252	286	1e-09	63.2		Oryza australiensis.	TrEMBL
10125_Transcript_1/1_Confidence_1.000_Length_659_45	659	PP143_ARATH	761	59.26	216	88	0	650	3	260	475	4e-72	267	Full=Putative pentatricopeptide repeat-containing protein At2g02150;	Arabidopsis thaliana (Mouse-ear cress).	Swiss-Prot
10135_Transcript_1/2_Confidence_1.000_Length_840_45	840	At3g31023	1098	36.27	102	65	0	306	1	28	129	5e-13	73.6	[R] KOG0017 FOG: Transposon-encoded proteins with TYA, reverse transcriptase, integrase domains in various combinations		KOG
10136_Transcript_1/2_Confidence_1.000_Length_736_45	736	LOC_OS04G58720_PlantCyc_LOC_OS04G58720.1-MONOMER	1011	70.32	155	45	1	493	32	5	159	3e-59	223	0	0	PlantCyc
10144_Transcript_1/1_Confidence_1.000_Length_1297_45	1297	PPR87_ARATH	408	53.36	283	128	1	15	851	121	403	9e-82	300	Full=Pentatricopeptide repeat-containing protein At1g61870, mitochondrial;	Arabidopsis thaliana (Mouse-ear cress).	Swiss-Prot
10147_Transcript_1/1_Confidence_1.000_Length_439_45	439	F6GYM3_VITVI	134	48.94	94	44	1	1	270	37	130	2e-20	98.6		Vitis vinifera (Grape).	TrEMBL
10149_Transcript_2/3_Confidence_0.667_Length_893_45	893	Q7EYR9_ORYSJ	231	53.33	195	81	3	100	654	5	199	2e-47	190		Oryza sativa subsp. japonica (Rice).	TrEMBL
10158_Transcript_1/1_Confidence_1.000_Length_993_45	993	PMA10_ARATH	947	80.18	328	65	0	1	984	561	888	3e-133	471	Full=ATPase 10, plasma membrane-type;	Arabidopsis thaliana (Mouse-ear cress).	Swiss-Prot
10166_Transcript_1/1_Confidence_1.000_Length_859_45	859	CDPKD_ARATH	528	79.78	183	37	0	859	311	339	521	8e-80	293	Full=Calcium-dependent protein kinase 13;	Arabidopsis thaliana (Mouse-ear cress).	Swiss-Prot
10168_Transcript_2/2_Confidence_1.000_Length_1005_45	1005	C5XE19_SORBI	94	74.19	93	23	1	565	290	1	93	3e-33	144		Sorghum bicolor (Sorghum) (Sorghum vulgare).	TrEMBL
10183_Transcript_1/1_Confidence_1.000_Length_369_45	369	Q8GTB6_PlantCyc_MONOMER-12033	545	10.66	122	101	3	355	11	325	445	4e-21	94.4	THCA synthase	Cannabis sativa	PlantCyc
101_Transcript_1/3_Confidence_0.429_Length_537_45	537	At3g15940	697	67.71	96	31	0	537	250	599	694	1e-32	137	[M] KOG0853 Glycosyltransferase		KOG
10204_Transcript_1/1_Confidence_1.000_Length_254_45	254	PPR7_ARATH	429	45.24	84	44	1	1	252	122	203	4e-10	59.7	Full=Putative pentatricopeptide repeat-containing protein At1g03510;	Arabidopsis thaliana (Mouse-ear cress).	Swiss-Prot
10208_Transcript_2/2_Confidence_1.000_Length_711_45	711	SNF4_ARATH	487	70.93	86	25	0	454	711	1	86	5e-35	144	Full=Sucrose nonfermenting 4-like protein;	Arabidopsis thaliana (Mouse-ear cress).	Swiss-Prot
10209_Transcript_1/1_Confidence_1.000_Length_547_45	547	GLR34_ARATH	959	56.77	192	71	1	546	7	183	374	2e-59	224	Full=Glutamate receptor 3.4;	Arabidopsis thaliana (Mouse-ear cress).	Swiss-Prot
1020_Transcript_3/3_Confidence_0.600_Length_2231_45	2231	LOC_OS07G39780_PlantCyc_LOC_OS07G39780.1-MONOMER	639	72.09	602	157	4	2107	317	10	605	0	861	0	0	PlantCyc
10213_Transcript_3/3_Confidence_0.500_Length_1874_45	1874	KASC1_HORVU	462	87.68	414	51	0	1796	555	43	456	0	749	Full=3-oxoacyl-[acyl-carrier-protein] synthase I, chloroplastic;	Hordeum vulgare (Barley).	Swiss-Prot
1021_Transcript_1/1_Confidence_1.000_Length_256_45	256	Q9M622_ARATH	310	86.36	22	3	0	253	188	258	279	1e-06	53.1		Arabidopsis thaliana (Mouse-ear cress).	TrEMBL
10232_Transcript_1/1_Confidence_1.000_Length_511_45	511	LOC_OS03G13920_PlantCyc_LOC_OS03G13920.1-MONOMER	1111	40.79	76	41	1	142	357	490	565	3e-11	62.8	0	0	PlantCyc
10235_Transcript_1/1_Confidence_1.000_Length_488_45	488	B9RZ89_RICCO	211	60	125	50	0	487	113	87	211	5e-31	134		Ricinus communis (Castor bean).	TrEMBL
10239_Transcript_2/2_Confidence_1.000_Length_692_45	692	B9GMF9_POPTR	106	55.81	43	18	1	310	435	64	106	4e-06	52.8		Populus trichocarpa (Western balsam poplar) (Populus balsamifera subsp. trichocarpa).	TrEMBL
1023_Transcript_1/1_Confidence_1.000_Length_1044_45	1044	EXLA2_ORYSJ	275	54.69	245	109	2	925	197	31	275	1e-82	303	Full=Expansin-like A2;	Oryza sativa subsp. japonica (Rice).	Swiss-Prot
1024_Transcript_3/4_Confidence_0.625_Length_571_45	571	LOC_OS05G39770_PlantCyc_LOC_OS05G39770.1-MONOMER	480	79.78	89	18	0	570	304	386	474	2e-38	152	0	0	PlantCyc
10252_Transcript_3/3_Confidence_0.714_Length_845_45	845	At3g07170	203	64.81	54	19	0	439	278	141	194	4e-12	70.5	[A] KOG4374 RNA-binding protein Bicaudal-C		KOG
10261_Transcript_1/1_Confidence_1.000_Length_1543_45	1543	CCC1_ORYSJ	989	69.66	468	133	4	1391	3	1	464	4e-174	607	Full=Cation-chloride cotransporter 1;	Oryza sativa subsp. japonica (Rice).	Swiss-Prot
10266_Transcript_1/2_Confidence_1.000_Length_698_45	698	TIP11_ORYSJ	250	80.19	212	42	0	643	8	1	212	5e-76	280	Full=Probable aquaporin TIP1-1;	Oryza sativa subsp. japonica (Rice).	Swiss-Prot
10270_Transcript_1/1_Confidence_1.000_Length_1349_45	1349	ATPB_PHAAO	498	85.53	152	22	0	778	1233	347	498	8e-121	251	Full=ATP synthase subunit beta, chloroplastic;	Phalaenopsis aphrodite subsp. formosana (Moth orchid).	Swiss-Prot
10277_Transcript_11/11_Confidence_0.676_Length_2341_45	2341	C5YZ47_SORBI	1673	23.12	584	347	22	11	1615	1138	1668	2e-11	72.8		Sorghum bicolor (Sorghum) (Sorghum vulgare).	TrEMBL
10285_Transcript_1/1_Confidence_1.000_Length_245_45	245	PPR39_ARATH	644	42.31	78	45	0	236	3	410	487	7e-14	72	Full=Pentatricopeptide repeat-containing protein At1g12775, mitochondrial;	Arabidopsis thaliana (Mouse-ear cress).	Swiss-Prot
10289_Transcript_1/1_Confidence_1.000_Length_411_45	411	A6YT27_9ASPA	309	46.88	96	46	1	1	288	219	309	1e-12	73.2		Cymbidium insigne.	TrEMBL
1029_Transcript_1/5_Confidence_0.667_Length_1412_45	1412	RCL1_ARATH	375	62.5	400	120	2	1367	168	6	375	7e-133	470	Full=Probable RNA 3'-terminal phosphate cyclase-like protein;	Arabidopsis thaliana (Mouse-ear cress).	Swiss-Prot
10304_Transcript_5/7_Confidence_0.579_Length_1760_45	1760	At2g37850	447	35.06	385	222	7	1739	609	2	366	2e-42	172	[OUT] KOG0595 Serine/threonine-protein kinase involved in autophagy		KOG
10312_Transcript_1/2_Confidence_1.000_Length_1255_45	1255	SGN-U577310_PlantCyc_SGN-U314708-MONOMER	325	46.15	312	152	4	26	961	3	298	5e-71	263	ribulose bisphosphate carboxylase/oxygenase	Solanum lycopersicum	PlantCyc
10322_Transcript_1/2_Confidence_1.000_Length_555_45	555	MAVI_CUCPE	108	44.12	68	38	0	512	309	36	103	4e-12	67.8	Full=Mavicyanin;	Cucurbita pepo (Vegetable marrow) (Summer squash).	Swiss-Prot
10338_Transcript_2/3_Confidence_0.667_Length_747_45	747	At2g18100	655	42.26	168	80	4	186	665	4	162	6e-19	92.8	[S] KOG2385 Uncharacterized conserved protein		KOG
10339_Transcript_1/1_Confidence_1.000_Length_691_45	691	LRKS4_ARATH	684	33.64	214	110	10	107	664	26	235	7e-15	77.4	Full=L-type lectin-domain containing receptor kinase S.4;	Arabidopsis thaliana (Mouse-ear cress).	Swiss-Prot
10342_Transcript_1/1_Confidence_1.000_Length_425_45	425	POLX_TOBAC	1328	65.22	92	32	0	3	278	931	1022	3e-31	130	Full=Retrovirus-related Pol polyprotein from transposon TNT 1-94;	Nicotiana tabacum (Common tobacco).	Swiss-Prot
10348_Transcript_1/1_Confidence_1.000_Length_736_45	736	F6HFV9_VITVI	1005	52.94	255	109	1	3	734	205	459	3e-71	269		Vitis vinifera (Grape).	TrEMBL
10354_Transcript_1/1_Confidence_1.000_Length_2971_45	2971	RF298_ARATH	814	32.99	867	478	20	2827	326	14	810	3e-92	337	Full=Putative E3 ubiquitin-protein ligase RF298;	Arabidopsis thaliana (Mouse-ear cress).	Swiss-Prot
10371_Transcript_1/1_Confidence_1.000_Length_482_45	482	AB22G_ARATH	751	60.61	66	26	0	2	199	388	453	3e-28	82.4	Full=ABC transporter G family member 22;	Arabidopsis thaliana (Mouse-ear cress).	Swiss-Prot
10375_Transcript_1/1_Confidence_1.000_Length_240_45	240	Q5JJU6_ORYSJ	1245	44.26	61	33	1	56	235	1086	1146	4e-06	51.2		Oryza sativa subsp. japonica (Rice).	TrEMBL
10378_Transcript_1/4_Confidence_0.444_Length_1118_45	1118	HMOX2_ARATH	299	52.98	151	53	3	969	571	49	199	1e-59	149	Full=Probable inactive heme oxygenase 2, chloroplastic;	Arabidopsis thaliana (Mouse-ear cress).	Swiss-Prot
1037_Transcript_2/3_Confidence_0.867_Length_1152_45	1152	FTRV_MAIZE	97	70.37	54	16	0	775	936	43	96	3e-19	92.8	Full=Ferredoxin-thioredoxin reductase, variable chain;	Zea mays (Maize).	Swiss-Prot
10384_Transcript_1/1_Confidence_1.000_Length_720_45	720	BRL2_ARATH	1143	46.33	218	108	3	91	720	46	262	1e-35	146	Full=Serine/threonine-protein kinase BRI1-like 2;	Arabidopsis thaliana (Mouse-ear cress).	Swiss-Prot
10385_Transcript_1/5_Confidence_0.636_Length_2302_45	2302	FRO8_ARATH	728	40.44	727	399	10	2204	111	7	728	1e-137	487	Full=Ferric reduction oxidase 8, mitochondrial;	Arabidopsis thaliana (Mouse-ear cress).	Swiss-Prot
10398_Transcript_1/1_Confidence_1.000_Length_1133_45	1133	C5Y3G5_SORBI	406	33.58	265	147	10	1128	391	148	402	2e-23	111		Sorghum bicolor (Sorghum) (Sorghum vulgare).	TrEMBL
10406_Transcript_1/1_Confidence_1.000_Length_1255_45	1255	At1g03910	672	60.53	114	45	0	657	316	257	370	1e-65	148	[T] KOG2370 Cactin		KOG
10408_Transcript_1/1_Confidence_1.000_Length_434_45	434	Q2RBE2_ORYSJ	801	36.56	93	59	0	415	137	708	800	7e-08	57		Oryza sativa subsp. japonica (Rice).	TrEMBL
1040_Transcript_3/7_Confidence_0.700_Length_4677_45	4677	At5g04290	1493	30.15	1519	819	42	22	4389	1	1340	4e-145	515	[K] KOG1999 RNA polymerase II transcription elongation factor DSIF/SUPT5H/SPT5		KOG
10412_Transcript_3/3_Confidence_0.600_Length_1250_45	1250	SGN-U582712_PlantCyc_SGN-U317421-MONOMER	361	62.58	318	117	1	172	1119	26	343	6e-122	432	TRIACYLGLYCEROL LIPASE	Solanum lycopersicum	PlantCyc
10419_Transcript_1/1_Confidence_1.000_Length_1457_45	1457	AB13C_ARATH	1410	67.42	485	158	0	1	1455	919	1403	3e-172	601	Full=ABC transporter C family member 13;	Arabidopsis thaliana (Mouse-ear cress).	Swiss-Prot
10423_Transcript_1/1_Confidence_1.000_Length_1023_45	1023	Y4443_ARATH	350	24.38	160	109	4	877	434	90	249	1e-06	50.8	Full=Probable transposase-like protein At4g04430;	Arabidopsis thaliana (Mouse-ear cress).	Swiss-Prot
10434_Transcript_5/6_Confidence_0.294_Length_2158_45	2158	E5GBB7_CUCME	871	28.31	332	209	10	504	1463	289	603	5e-30	134		Cucumis melo subsp. melo.	TrEMBL
10438_Transcript_2/3_Confidence_0.556_Length_1247_45	1247	APL_ARATH	358	42.24	116	58	2	759	430	57	169	1e-26	97.4	Full=Myb family transcription factor APL;	Arabidopsis thaliana (Mouse-ear cress).	Swiss-Prot
10440_Transcript_1/1_Confidence_1.000_Length_1530_45	1530	At2g34560	393	69.88	405	104	3	1442	231	4	391	3e-158	556	[O] KOG0738 AAA+-type ATPase		KOG
10446_Transcript_1/1_Confidence_1.000_Length_739_45	739	PME34_ARATH	598	64.02	239	81	2	36	737	183	421	9e-77	283	Full=Probable pectinesterase/pectinesterase inhibitor 34;	Arabidopsis thaliana (Mouse-ear cress).	Swiss-Prot
1044_Transcript_7/10_Confidence_0.516_Length_1637_45	1637	RGA3_SOLBU	992	38.7	261	141	8	786	7	153	395	7e-39	158	Full=Putative disease resistance protein RGA3;	Solanum bulbocastanum (Wild potato).	Swiss-Prot
10450_Transcript_1/1_Confidence_1.000_Length_385_45	385	NEK3_ORYSJ	585	87.5	104	13	0	74	385	1	104	2e-48	187	Full=Serine/threonine-protein kinase Nek3;	Oryza sativa subsp. japonica (Rice).	Swiss-Prot
10452_Transcript_1/1_Confidence_1.000_Length_210_45	210	Y1534_ARATH	953	78.26	69	15	0	2	208	697	765	2e-27	117	Full=Probable LRR receptor-like serine/threonine-protein kinase At1g53420;	Arabidopsis thaliana (Mouse-ear cress).	Swiss-Prot
10464_Transcript_1/1_Confidence_1.000_Length_2554_45	2554	FPP1_ARATH	779	20.57	389	247	9	1808	681	341	680	5e-08	57	Full=Filament-like plant protein 1;	Arabidopsis thaliana (Mouse-ear cress).	Swiss-Prot
1046_Transcript_7/8_Confidence_0.650_Length_4836_45	4836	ALE2_ARATH	744	62.23	368	121	6	1481	384	329	680	9e-121	432	Full=Receptor-like serine/threonine-protein kinase ALE2;	Arabidopsis thaliana (Mouse-ear cress).	Swiss-Prot
10475_Transcript_5/6_Confidence_0.600_Length_1680_45	1680	F6H175_VITVI	604	45.03	584	249	18	1614	40	26	596	1e-100	368		Vitis vinifera (Grape).	TrEMBL
10477_Transcript_1/1_Confidence_1.000_Length_567_45	567	F2WNM1_AQUFO	641	37.8	82	47	1	307	74	359	440	6e-07	55.1		Aquilegia formosa (Western columbine).	TrEMBL
1047_Transcript_15/18_Confidence_0.173_Length_1153_45	1153	D7LVJ3_ARALL	403	66	50	17	0	654	505	144	193	1e-16	73.2		Arabidopsis lyrata subsp. lyrata (Lyre-leaved rock-cress).	TrEMBL
1047_Transcript_17/18_Confidence_0.212_Length_1704_45	1704	IF4E2_WHEAT	209	75.89	141	34	0	1690	1268	32	172	9e-64	241	Full=Eukaryotic translation initiation factor 4E-2;	Triticum aestivum (Wheat).	Swiss-Prot
1047_Transcript_18/18_Confidence_0.288_Length_1151_45	1151	LOC_OS06G06390_PlantCyc_LOC_OS06G06390.1-MONOMER	989	29.87	154	99	3	675	241	823	976	1e-13	72.4	0	0	PlantCyc
10481_Transcript_6/7_Confidence_0.600_Length_2531_45	2531	ACBP_RICCO	90	87.18	78	10	0	2067	2300	4	81	5e-35	146	Full=Acyl-CoA-binding protein;	Ricinus communis (Castor bean).	Swiss-Prot
1048_Transcript_6/7_Confidence_0.625_Length_4127_45	4127	LOC_OS02G03260_PlantCyc_LOC_OS02G03260.1-MONOMER	514	83.13	504	79	2	234	1727	11	514	0	840	0	0	PlantCyc
1049_Transcript_1/2_Confidence_1.000_Length_1102_45	1102	PE192_ARATH	245	61.81	199	73	3	242	838	50	245	3e-67	252	Full=Peroxisome biogenesis protein 19-2;	Arabidopsis thaliana (Mouse-ear cress).	Swiss-Prot
10502_Transcript_1/1_Confidence_1.000_Length_413_45	413	B6SK14_MAIZE	146	61.11	36	14	0	93	200	111	146	9e-08	45.1		Zea mays (Maize).	TrEMBL
10507_Transcript_3/6_Confidence_0.350_Length_1230_45	1230	PSA5_SOYBN	237	90.7	86	8	0	724	981	152	237	3e-39	159	Full=Proteasome subunit alpha type-5;	Glycine max (Soybean) (Glycine hispida).	Swiss-Prot
10507_Transcript_5/6_Confidence_0.400_Length_1729_45	1729	ALA2_PANMI	482	85.31	143	21	0	278	706	234	376	7e-67	251	Full=Alanine aminotransferase 2;	Panicum miliaceum (Proso millet) (Broomcorn millet).	Swiss-Prot
10508_Transcript_8/10_Confidence_0.478_Length_2972_45	2972	At1g11265	1352	44.8	375	190	5	1232	2347	1	361	3e-146	296	[R] KOG0017 FOG: Transposon-encoded proteins with TYA, reverse transcriptase, integrase domains in various combinations		KOG
10512_Transcript_2/2_Confidence_1.000_Length_616_45	616	TIF9_ARATH	197	44.23	104	45	3	16	291	90	192	7e-15	77	Full=Protein TIFY 9;	Arabidopsis thaliana (Mouse-ear cress).	Swiss-Prot
10515_Transcript_1/2_Confidence_1.000_Length_2623_45	2623	BRI1_SOLPE	1207	66.92	795	250	10	2620	242	395	1178	0	1037	Full=Systemin receptor SR160;	Solanum peruvianum (Peruvian tomato) (Lycopersicon peruvianum).	Swiss-Prot
10524_Transcript_1/1_Confidence_1.000_Length_471_45	471	DET2_ARATH	262	63.78	127	44	2	467	93	136	262	2e-44	174	Full=Probable steroid reductase DET2;	Arabidopsis thaliana (Mouse-ear cress).	Swiss-Prot
1052_Transcript_4/4_Confidence_0.850_Length_5403_45	5403	TIC_ARATH	1550	27.51	1407	785	43	659	4540	196	1480	3e-70	264	Full=Protein TIME FOR COFFEE;	Arabidopsis thaliana (Mouse-ear cress).	Swiss-Prot
10533_Transcript_1/1_Confidence_1.000_Length_280_45	280	UCRI3_TOBAC	268	88.89	27	3	0	1	81	130	156	3e-12	46.6	Full=Cytochrome b-c1 complex subunit Rieske-3, mitochondrial;	Nicotiana tabacum (Common tobacco).	Swiss-Prot
1053_Transcript_5/6_Confidence_0.375_Length_1692_45	1692	At4g38950	834	33.73	424	210	12	327	1586	477	833	8e-44	177	[Z] KOG0242 Kinesin-like protein		KOG
10553_Transcript_1/4_Confidence_0.625_Length_1149_45	1149	HsM14249476	215	45	40	22	0	889	1008	108	147	2e-06	52	[R] KOG1311 DHHC-type Zn-finger proteins		KOG
10554_Transcript_1/2_Confidence_1.000_Length_1678_45	1678	Y2923_ARATH	877	31.13	530	295	13	1636	83	24	495	3e-64	243	Full=Putative leucine-rich repeat receptor-like serine/threonine-protein kinase At2g19230;	Arabidopsis thaliana (Mouse-ear cress).	Swiss-Prot
10565_Transcript_1/1_Confidence_1.000_Length_434_45	434	At2g22350	321	45.9	61	33	0	250	432	153	213	2e-08	56.6	[R] KOG1075 FOG: Reverse transcriptase		KOG
10594_Transcript_1/1_Confidence_1.000_Length_430_45	430	E134_ARATH	505	48	75	37	2	429	208	387	460	3e-14	73.9	Full=Glucan endo-1,3-beta-glucosidase 4;	Arabidopsis thaliana (Mouse-ear cress).	Swiss-Prot
105_Transcript_3/4_Confidence_0.571_Length_2900_45	2900	YCX91_PHAAO	91	66.07	56	19	0	2088	1921	3	58	5e-14	68.9	Full=Uncharacterized protein ORF91;	Phalaenopsis aphrodite subsp. formosana (Moth orchid).	Swiss-Prot
10600_Transcript_1/1_Confidence_1.000_Length_1535_45	1535	F6HQH8_VITVI	1741	57.06	510	210	8	1	1512	941	1447	3e-159	563		Vitis vinifera (Grape).	TrEMBL
10604_Transcript_1/1_Confidence_1.000_Length_339_45	339	C0P3I0_MAIZE	620	49.54	109	54	1	334	8	463	570	2e-21	102		Zea mays (Maize).	TrEMBL
10609_Transcript_5/5_Confidence_0.692_Length_1154_45	1154	CID2_ARATH	143	49.06	53	27	0	493	651	10	62	3e-12	69.7	Full=Polyadenylate-binding protein-interacting protein 2;	Arabidopsis thaliana (Mouse-ear cress).	Swiss-Prot
10612_Transcript_1/1_Confidence_1.000_Length_862_45	862	At4g27010	2535	46.18	275	144	2	830	6	23	293	9e-66	248	[S] KOG1791 Uncharacterized conserved protein		KOG
10621_Transcript_1/1_Confidence_1.000_Length_964_45	964	DXS_ORYSJ	720	79.08	196	15	1	368	955	376	545	8e-125	285	Full=Probable 1-deoxy-D-xylulose-5-phosphate synthase, chloroplastic;	Oryza sativa subsp. japonica (Rice).	Swiss-Prot
10622_Transcript_1/1_Confidence_1.000_Length_1016_45	1016	F6H5L2_VITVI	774	73.19	235	63	0	1015	311	519	753	4e-101	369		Vitis vinifera (Grape).	TrEMBL
10638_Transcript_1/1_Confidence_1.000_Length_817_45	817	GLNB_ORYSJ	212	67.2	186	56	2	708	151	29	209	5e-61	231	Full=Nitrogen regulatory protein P-II homolog;	Oryza sativa subsp. japonica (Rice).	Swiss-Prot
10645_Transcript_1/2_Confidence_1.000_Length_983_45	983	B9ID28_POPTR	109	68.38	117	26	3	592	242	1	106	3e-36	153		Populus trichocarpa (Western balsam poplar) (Populus balsamifera subsp. trichocarpa).	TrEMBL
1064_Transcript_3/5_Confidence_0.417_Length_848_45	848	POLX_TOBAC	1328	65.79	38	13	0	727	614	1111	1148	3e-12	59.7	Full=Retrovirus-related Pol polyprotein from transposon TNT 1-94;	Nicotiana tabacum (Common tobacco).	Swiss-Prot
10653_Transcript_1/1_Confidence_1.000_Length_447_45	447	C5XKT4_SORBI	443	56.67	60	25	1	57	236	367	425	5e-10	64.3		Sorghum bicolor (Sorghum) (Sorghum vulgare).	TrEMBL
10654_Transcript_1/2_Confidence_1.000_Length_1153_45	1153	At2g35320	282	58.99	278	109	1	1055	237	1	278	2e-85	315	[R] KOG3107 Predicted haloacid dehalogenase-like hydrolase (eyes absent)		KOG
10659_Transcript_4/4_Confidence_0.667_Length_2657_45	2657	LOC_OS09G32820_PlantCyc_LOC_OS09G32820.1-MONOMER	496	83.96	268	40	1	102	896	58	325	7e-127	449	0	0	PlantCyc
10669_Transcript_1/1_Confidence_1.000_Length_885_45	885	H32_WHEAT	136	91.3	23	2	0	763	831	13	35	4e-09	45.1	Full=Histone H3.2;	Triticum aestivum (Wheat).	Swiss-Prot
1066_Transcript_1/10_Confidence_0.593_Length_2103_45	2103	LOC_OS12G16650_PlantCyc_LOC_OS12G16650.1-MONOMER	837	57.88	406	166	4	890	2098	278	681	4e-128	453	0	0	PlantCyc
1066_Transcript_3/10_Confidence_0.593_Length_2278_45	2278	LOC_OS12G16650_PlantCyc_LOC_OS12G16650.1-MONOMER	837	58.47	366	147	4	1185	2273	318	681	1e-114	409	0	0	PlantCyc
1066_Transcript_6/10_Confidence_0.593_Length_2635_45	2635	LOC_OS12G16650_PlantCyc_LOC_OS12G16650.1-MONOMER	837	54.75	400	178	2	214	1407	39	437	8e-117	416	0	0	PlantCyc
10680_Transcript_2/2_Confidence_1.000_Length_269_45	269	UPL3_ARATH	1888	65.71	35	12	0	146	42	1700	1734	3e-07	50.1	Full=E3 ubiquitin-protein ligase UPL3;	Arabidopsis thaliana (Mouse-ear cress).	Swiss-Prot
10689_Transcript_1/1_Confidence_1.000_Length_1784_45	1784	gi|330488249|gb|JI643678.1|	3045	77.31	1534	279	67	82	1581	276	1774	0	841	TSA: Phalaenopsis aphrodite PATC143366 mRNA sequence.	Phalaenopsis aphrodite	GenBank-NT
10692_Transcript_1/1_Confidence_1.000_Length_660_45	660	Q7XKD6_ORYSJ	138	59.15	142	49	2	155	565	1	138	5e-51	201		Oryza sativa subsp. japonica (Rice).	TrEMBL
10694_Transcript_2/2_Confidence_1.000_Length_1300_45	1300	Y4598_ARATH	265	35.71	238	108	5	216	851	44	262	5e-23	105	Full=Uncharacterized protein At4g06598;	Arabidopsis thaliana (Mouse-ear cress).	Swiss-Prot
10707_Transcript_1/1_Confidence_1.000_Length_964_45	964	Y3739_ARATH	588	46	50	27	0	249	100	72	121	3e-09	45.8	Full=Uncharacterized membrane protein At3g27390;	Arabidopsis thaliana (Mouse-ear cress).	Swiss-Prot
10709_Transcript_3/4_Confidence_0.625_Length_569_45	569	F2D493_HORVD	538	33.33	153	93	2	2	433	382	534	3e-12	72.4		Hordeum vulgare var. distichum (Two-rowed barley).	TrEMBL
10712_Transcript_1/1_Confidence_1.000_Length_1385_45	1385	At4g27760	374	66.85	362	118	1	1306	221	15	374	2e-134	477	[Q] KOG1208 Dehydrogenases with different specificities (related to short-chain alcohol dehydrogenases)		KOG
10716_Transcript_1/1_Confidence_1.000_Length_424_45	424	At2g28710	156	45.59	68	26	1	12	182	78	145	6e-10	61.2	[R] KOG1721 FOG: Zn-finger		KOG
1071_Transcript_2/2_Confidence_1.000_Length_1300_45	1300	At2g26280	567	37.25	400	211	8	1277	171	18	408	5e-70	248	[L] KOG2401 Predicted MutS-related protein involved in mismatch repair		KOG
10720_Transcript_1/2_Confidence_1.000_Length_1855_45	1855	PPR32_ARATH	809	45.25	579	310	4	8	1732	234	809	2e-140	496	Full=Pentatricopeptide repeat-containing protein At1g11290;	Arabidopsis thaliana (Mouse-ear cress).	Swiss-Prot
10727_Transcript_1/1_Confidence_1.000_Length_1179_45	1179	At2g01490	207	72.4	192	51	1	1137	568	1	192	3e-78	290	[I] KOG3290 Peroxisomal phytanoyl-CoA hydroxylase		KOG
10737_Transcript_1/1_Confidence_1.000_Length_560_45	560	Hs13654276	403	64.12	131	47	0	396	4	26	156	7e-45	178	[A] KOG3908 Queuine-tRNA ribosyltransferase		KOG
10743_Transcript_1/1_Confidence_1.000_Length_526_45	526	D7STP4_VITVI	108	77.42	62	14	0	525	340	46	107	2e-27	122		Vitis vinifera (Grape).	TrEMBL
10748_Transcript_1/1_Confidence_1.000_Length_604_45	604	KSG8_ARATH	472	52.55	196	87	4	572	3	1	196	7e-47	183	Full=Shaggy-related protein kinase theta;	Arabidopsis thaliana (Mouse-ear cress).	Swiss-Prot
10756_Transcript_1/1_Confidence_1.000_Length_654_45	654	LOC_OS05G30750_PlantCyc_LOC_OS05G30750.1-MONOMER	774	76.96	217	50	0	653	3	208	424	5e-99	354	0	0	PlantCyc
10762_Transcript_2/2_Confidence_1.000_Length_415_45	415	PPA1_SOLLC	255	53.85	104	48	0	1	312	94	197	2e-24	107	Full=Acid phosphatase 1;	Solanum lycopersicum (Tomato) (Lycopersicon esculentum).	Swiss-Prot
10763_Transcript_1/1_Confidence_1.000_Length_582_45	582	NPY1_ARATH	571	51.76	199	87	3	582	1	117	311	3e-49	191	Full=BTB/POZ domain-containing protein NPY1;	Arabidopsis thaliana (Mouse-ear cress).	Swiss-Prot
10764_Transcript_1/2_Confidence_1.000_Length_749_45	749	D7TAM0_VITVI	165	71.17	111	31	1	241	570	54	164	2e-40	166		Vitis vinifera (Grape).	TrEMBL
10765_Transcript_1/1_Confidence_1.000_Length_447_45	447	LOC_OS02G53130_PlantCyc_LOC_OS02G53130.1-MONOMER	889	85.14	148	22	0	2	445	271	418	1e-78	286	0	0	PlantCyc
1076_Transcript_6/7_Confidence_0.684_Length_2603_45	2603	At2g33440	475	53.61	97	45	0	1365	1655	284	380	1e-21	104	[A] KOG0120 Splicing factor U2AF, large subunit (RRM superfamily)		KOG
10778_Transcript_2/2_Confidence_1.000_Length_432_45	432	Q10Q83_ORYSJ	444	54.72	53	24	0	1	159	389	441	3e-09	61.6		Oryza sativa subsp. japonica (Rice).	TrEMBL
1077_Transcript_1/1_Confidence_1.000_Length_1066_45	1066	D7T2H7_VITVI	198	88.35	103	12	0	192	500	1	103	9e-48	192		Vitis vinifera (Grape).	TrEMBL
10784_Transcript_1/1_Confidence_1.000_Length_1263_45	1263	RTE1_ARATH	250	61.72	209	80	0	295	921	38	246	6e-85	311	Full=Protein REVERSION-TO-ETHYLENE SENSITIVITY1;	Arabidopsis thaliana (Mouse-ear cress).	Swiss-Prot
10787_Transcript_1/1_Confidence_1.000_Length_367_45	367	At3g18660	575	55.71	70	31	0	6	215	479	548	1e-21	100	[G] KOG1950 Glycosyl transferase, family 8 - glycogenin		KOG
10792_Transcript_1/1_Confidence_1.000_Length_939_45	939	PPR21_ARATH	741	47.39	211	110	1	28	660	532	741	5e-54	207	Full=Pentatricopeptide repeat-containing protein At1g08070;	Arabidopsis thaliana (Mouse-ear cress).	Swiss-Prot
10793_Transcript_1/4_Confidence_0.667_Length_1235_45	1235	BIM2_ARATH	311	35.17	236	115	6	1233	532	72	271	2e-26	116	Full=Transcription factor BIM2;	Arabidopsis thaliana (Mouse-ear cress).	Swiss-Prot
10797_Transcript_1/1_Confidence_1.000_Length_385_45	385	PP220_ARATH	1028	49.59	121	61	0	17	379	773	893	3e-30	126	Full=Pentatricopeptide repeat-containing protein At3g09040, mitochondrial;	Arabidopsis thaliana (Mouse-ear cress).	Swiss-Prot
10799_Transcript_1/1_Confidence_1.000_Length_774_45	774	Hs4757754	316	31.89	254	168	4	12	758	37	290	7e-30	129	[U] KOG0819 Annexin		KOG
10800_Transcript_1/2_Confidence_1.000_Length_1315_45	1315	RPS5_ARATH	889	39.67	368	215	5	1099	5	138	501	3e-57	219	Full=Disease resistance protein RPS5;	Arabidopsis thaliana (Mouse-ear cress).	Swiss-Prot
10805_Transcript_1/1_Confidence_1.000_Length_1375_45	1375	XYL1_ARATH	915	69.04	449	137	2	1368	22	418	864	0	669	Full=Alpha-xylosidase;	Arabidopsis thaliana (Mouse-ear cress).	Swiss-Prot
10824_Transcript_1/1_Confidence_1.000_Length_248_45	248	SM3L1_ARATH	881	65.38	52	18	0	2	157	254	305	1e-15	78.2	Full=Putative SWI/SNF-related matrix-associated actin-dependent regulator of chromatin subfamily A member 3-like 1;	Arabidopsis thaliana (Mouse-ear cress).	Swiss-Prot
10832_Transcript_1/1_Confidence_1.000_Length_380_45	380	C5XVX2_SORBI	647	46.3	108	47	4	85	378	44	150	2e-11	68.9		Sorghum bicolor (Sorghum) (Sorghum vulgare).	TrEMBL
10834_Transcript_1/1_Confidence_1.000_Length_362_45	362	PATL3_ARATH	490	62.3	122	43	1	362	6	299	420	3e-41	162	Full=Patellin-3;	Arabidopsis thaliana (Mouse-ear cress).	Swiss-Prot
10835_Transcript_3/7_Confidence_0.174_Length_657_45	657	GBB_ORYSJ	380	81.94	155	27	1	463	2	3	157	1e-64	242	Full=Guanine nucleotide-binding protein subunit beta;	Oryza sativa subsp. japonica (Rice).	Swiss-Prot
10836_Transcript_1/4_Confidence_0.727_Length_4330_45	4330	At5g01400	1467	46.93	1287	596	22	1	3780	17	1243	0	1023	[A] KOG1895 mRNA cleavage and polyadenylation factor II complex, subunit PTA1		KOG
10836_Transcript_2/4_Confidence_0.636_Length_4306_45	4306	At5g01400	1467	46.97	1286	589	22	1	3756	17	1243	0	1021	[A] KOG1895 mRNA cleavage and polyadenylation factor II complex, subunit PTA1		KOG
10840_Transcript_1/1_Confidence_1.000_Length_2546_45	2546	At4g30490	447	60.55	218	49	2	2428	1775	79	259	6e-133	254	[R] KOG2383 Predicted ATPase		KOG
10847_Transcript_1/1_Confidence_1.000_Length_1237_45	1237	At3g54630	568	41.98	343	196	2	1227	202	226	566	7e-50	196	[D] KOG0995 Centromere-associated protein HEC1		KOG
10859_Transcript_1/1_Confidence_1.000_Length_234_45	234	At2g31080	1231	37.97	79	43	5	16	234	770	848	4e-06	48.1	[R] KOG1075 FOG: Reverse transcriptase		KOG
10860_Transcript_1/1_Confidence_1.000_Length_480_45	480	RNHX1_ARATH	620	38.51	148	80	3	46	468	16	159	2e-25	111	Full=Putative ribonuclease H protein At1g65750;	Arabidopsis thaliana (Mouse-ear cress).	Swiss-Prot
10865_Transcript_1/2_Confidence_1.000_Length_757_45	757	NAC48_ORYSJ	303	76	175	14	2	72	593	1	148	1e-73	273	Full=NAC domain-containing protein 48;	Oryza sativa subsp. japonica (Rice).	Swiss-Prot
10870_Transcript_1/2_Confidence_1.000_Length_780_45	780	At3g20230	187	74.1	139	34	1	554	138	50	186	1e-55	214	[O] KOG1870 Ubiquitin C-terminal hydrolase		KOG
1089_Transcript_2/2_Confidence_1.000_Length_952_45	952	B9SNT4_RICCO	268	48.04	204	91	5	40	627	49	245	1e-39	165		Ricinus communis (Castor bean).	TrEMBL
10900_Transcript_1/1_Confidence_1.000_Length_847_45	847	FLA13_ARATH	247	52.25	178	75	4	57	569	35	209	4e-41	164	Full=Fasciclin-like arabinogalactan protein 13;	Arabidopsis thaliana (Mouse-ear cress).	Swiss-Prot
10901_Transcript_1/1_Confidence_1.000_Length_407_45	407	Q9FZH2_ARATH	529	40.78	103	54	3	119	406	404	506	1e-07	56.2		Arabidopsis thaliana (Mouse-ear cress).	TrEMBL
10903_Transcript_4/5_Confidence_0.636_Length_2674_45	2674	ZTP50_ARATH	619	66.67	594	187	5	1964	195	30	616	1e-163	574	Full=Putative zinc transporter At3g08650;	Arabidopsis thaliana (Mouse-ear cress).	Swiss-Prot
1090_Transcript_7/7_Confidence_0.444_Length_5023_45	5023	At1g77800	1506	34.78	1518	760	43	5017	743	54	1434	0	684	[R] KOG0954 PHD finger protein		KOG
10917_Transcript_4/4_Confidence_0.571_Length_2965_45	2965	At2g28360	826	56.45	597	236	6	412	2196	65	639	1e-179	629	[D] KOG2073 SAP family cell cycle dependent phosphatase-associated protein		KOG
10925_Transcript_1/1_Confidence_1.000_Length_507_45	507	NIK1_ARATH	638	56.14	171	73	1	1	507	215	385	1e-48	188	Full=Protein NSP-INTERACTING KINASE 1;	Arabidopsis thaliana (Mouse-ear cress).	Swiss-Prot
10932_Transcript_1/2_Confidence_1.000_Length_444_45	444	C5X2L3_SORBI	338	67.15	137	35	3	19	399	1	137	1e-45	182		Sorghum bicolor (Sorghum) (Sorghum vulgare).	TrEMBL
10933_Transcript_1/1_Confidence_1.000_Length_449_45	449	SMC4_ARATH	1241	55.7	149	63	1	3	449	814	959	9e-33	135	Full=Structural maintenance of chromosomes protein 4;	Arabidopsis thaliana (Mouse-ear cress).	Swiss-Prot
10939_Transcript_4/7_Confidence_0.389_Length_810_45	810	PP2A_MEDSA	313	94.07	135	8	0	405	1	163	297	4e-76	281	Full=Serine/threonine-protein phosphatase PP2A catalytic subunit;	Medicago sativa (Alfalfa).	Swiss-Prot
10939_Transcript_6/7_Confidence_0.278_Length_1166_45	1166	PP2A_TOBAC	312	92.56	309	23	0	1114	188	4	312	5e-175	610	Full=Serine/threonine-protein phosphatase PP2A catalytic subunit;	Nicotiana tabacum (Common tobacco).	Swiss-Prot
10943_Transcript_1/1_Confidence_1.000_Length_426_45	426	B6UI71_MAIZE	227	73.21	56	15	0	16	183	172	227	2e-20	99		Zea mays (Maize).	TrEMBL
1094_Transcript_1/1_Confidence_1.000_Length_1509_45	1509	At2g32760_1	286	46.18	249	120	5	1165	425	1	237	1e-35	149	[R] KOG2896 UV radiation resistance associated protein		KOG
10951_Transcript_2/2_Confidence_1.000_Length_5647_45	5647	At5g23150	1392	45.57	485	230	12	2680	4104	565	1025	5e-84	312	[K] KOG1904 Transcription coactivator		KOG
10961_Transcript_1/1_Confidence_1.000_Length_1747_45	1747	ALA1_ARATH	1158	66.84	564	172	2	1	1692	587	1135	0	731	Full=Phospholipid-transporting ATPase 1;	Arabidopsis thaliana (Mouse-ear cress).	Swiss-Prot
10967_Transcript_1/1_Confidence_1.000_Length_292_45	292	Y5880_ARATH	614	65.59	93	32	0	12	290	34	126	2e-30	126	Full=BTB/POZ domain-containing protein At5g48800;	Arabidopsis thaliana (Mouse-ear cress).	Swiss-Prot
10968_Transcript_1/1_Confidence_1.000_Length_1235_45	1235	gi|242076499|ref|XM_002448141.1|	1672	78.75	800	140	30	74	858	211	995	2e-141	508	Sorghum bicolor hypothetical protein, mRNA.	Sorghum bicolor	GenBank-NT
1096_Transcript_3/4_Confidence_0.556_Length_1073_45	1073	At4g05450	197	78.42	139	27	2	471	887	62	197	3e-59	227	[C] KOG3309 Ferredoxin		KOG
10973_Transcript_1/1_Confidence_1.000_Length_583_45	583	B9REP3_RICCO	310	57.14	56	16	1	217	50	98	145	1e-06	54.3		Ricinus communis (Castor bean).	TrEMBL
10974_Transcript_2/4_Confidence_0.222_Length_773_45	773	At2g23820	243	76.92	143	33	0	153	581	80	222	2e-61	234	[R] KOG3197 Predicted hydrolases of HD superfamily		KOG
10981_Transcript_2/2_Confidence_1.000_Length_1698_45	1698	At4g38640	523	53.37	504	182	6	9	1475	51	516	1e-120	432	[I] KOG1362 Choline transporter-like protein		KOG
1098_Transcript_3/3_Confidence_0.714_Length_2057_45	2057	Y3471_ARATH	1025	40.34	699	396	12	2052	4	43	736	1e-120	431	Full=Putative receptor-like protein kinase At3g47110;	Arabidopsis thaliana (Mouse-ear cress).	Swiss-Prot
10996_Transcript_1/1_Confidence_1.000_Length_568_45	568	PP390_ARATH	850	49.47	188	87	2	566	3	161	340	2e-47	184	Full=Pentatricopeptide repeat-containing protein At5g16860;	Arabidopsis thaliana (Mouse-ear cress).	Swiss-Prot
109_Transcript_1/3_Confidence_0.667_Length_912_45	912	Q42606_PlantCyc_AT5G40850-MONOMER	369	81.25	224	42	0	911	240	139	362	7e-101	361	uroporphyrin-III C-methyltransferase	Arabidopsis thaliana	PlantCyc
11001_Transcript_1/1_Confidence_1.000_Length_255_45	255	HOX11_ORYSJ	362	88.31	77	9	0	24	254	160	236	3e-24	106	Full=Homeobox-leucine zipper protein HOX11;	Oryza sativa subsp. japonica (Rice).	Swiss-Prot
11011_Transcript_1/4_Confidence_0.600_Length_1198_45	1198	At1g17370	419	79.03	62	13	0	918	1103	35	96	1e-20	99.8	[R] KOG0118 FOG: RRM domain		KOG
11015_Transcript_2/5_Confidence_0.692_Length_2470_45	2470	C5WNS7_SORBI	693	32.92	723	400	23	138	2216	26	693	2e-63	245		Sorghum bicolor (Sorghum) (Sorghum vulgare).	TrEMBL
11020_Transcript_2/4_Confidence_0.286_Length_477_45	477	Q69L73_ORYSJ	454	35.37	82	53	0	357	112	346	427	3e-09	62		Oryza sativa subsp. japonica (Rice).	TrEMBL
11025_Transcript_1/1_Confidence_1.000_Length_902_45	902	B6U0C5_MAIZE	424	60.47	301	114	2	900	1	73	369	8e-94	344		Zea mays (Maize).	TrEMBL
11032_Transcript_2/2_Confidence_1.000_Length_690_45	690	PPA1_SOLLC	255	55.07	69	31	0	338	132	129	197	2e-17	85.5	Full=Acid phosphatase 1;	Solanum lycopersicum (Tomato) (Lycopersicon esculentum).	Swiss-Prot
11035_Transcript_2/5_Confidence_0.545_Length_1653_45	1653	LOC_OS07G46640_PlantCyc_LOC_OS07G46640.1-MONOMER	430	77.43	381	86	0	110	1252	50	430	1e-154	541	0	0	PlantCyc
11038_Transcript_1/1_Confidence_1.000_Length_407_45	407	RL6_MESCR	234	61.63	86	32	1	86	340	149	234	2e-25	96.7	Full=60S ribosomal protein L6;	Mesembryanthemum crystallinum (Common ice plant) (Cryophytum crystallinum).	Swiss-Prot
11040_Transcript_1/1_Confidence_1.000_Length_411_45	411	FBK77_ARATH	411	75.68	111	27	0	3	335	301	411	8e-49	188	Full=F-box/kelch-repeat protein At3g61590;	Arabidopsis thaliana (Mouse-ear cress).	Swiss-Prot
11046_Transcript_1/1_Confidence_1.000_Length_1693_45	1693	NAC78_ARATH	567	61.27	173	67	0	412	930	9	181	4e-63	239	Full=NAC domain-containing protein 78;	Arabidopsis thaliana (Mouse-ear cress).	Swiss-Prot
11070_Transcript_1/1_Confidence_1.000_Length_1246_45	1246	At3g16260	937	65.56	360	115	2	1	1077	557	908	6e-136	482	[R] KOG2121 Predicted metal-dependent hydrolase (beta-lactamase superfamily)		KOG
11077_Transcript_3/6_Confidence_0.667_Length_1203_45	1203	E13L3_ARATH	194	58.89	90	37	0	152	421	19	108	4e-31	132	Full=Glucan endo-1,3-beta-glucosidase-like protein 3;	Arabidopsis thaliana (Mouse-ear cress).	Swiss-Prot
11077_Transcript_5/6_Confidence_0.533_Length_916_45	916	E13L3_ARATH	194	59.77	87	35	0	162	422	19	105	1e-30	130	Full=Glucan endo-1,3-beta-glucosidase-like protein 3;	Arabidopsis thaliana (Mouse-ear cress).	Swiss-Prot
11088_Transcript_1/1_Confidence_1.000_Length_499_45	499	4CL2_ORYSJ	569	86.34	161	22	0	14	496	361	521	5e-79	289	Full=Probable 4-coumarate--CoA ligase 2;	Oryza sativa subsp. japonica (Rice).	Swiss-Prot
11089_Transcript_3/5_Confidence_0.600_Length_1504_45	1504	Q0E2I3_ORYSJ	918	52.25	333	151	3	2	997	592	917	1e-90	335		Oryza sativa subsp. japonica (Rice).	TrEMBL
1108_Transcript_2/4_Confidence_0.500_Length_2155_45	2155	BADH1_ARATH	501	80.97	494	94	0	373	1854	8	501	0	853	Full=Betaine aldehyde dehydrogenase 1, chloroplastic;	Arabidopsis thaliana (Mouse-ear cress).	Swiss-Prot
11091_Transcript_3/3_Confidence_0.667_Length_899_45	899	B6SQN8_MAIZE	165	58.44	154	56	3	216	659	1	152	5e-40	166		Zea mays (Maize).	TrEMBL
1109_Transcript_3/5_Confidence_0.667_Length_1345_45	1345	BGL31_ORYSJ	523	55.76	382	163	4	1345	203	128	504	4e-125	444	Full=Beta-glucosidase 31;	Oryza sativa subsp. japonica (Rice).	Swiss-Prot
11100_Transcript_2/2_Confidence_1.000_Length_279_45	279	At2g05940	462	75.47	53	13	0	160	2	269	321	7e-17	84	[T] KOG1187 Serine/threonine protein kinase		KOG
11101_Transcript_1/1_Confidence_1.000_Length_359_45	359	D7T4R6_VITVI	545	72.34	94	26	0	359	78	445	538	5e-23	107		Vitis vinifera (Grape).	TrEMBL
11106_Transcript_2/4_Confidence_0.750_Length_1894_45	1894	D7STJ2_VITVI	570	55.51	236	65	1	311	1018	89	284	5e-59	199		Vitis vinifera (Grape).	TrEMBL
11110_Transcript_1/1_Confidence_1.000_Length_371_45	371	At4g30350	924	48.78	123	52	3	1	369	136	247	3e-16	82	[O] KOG1051 Chaperone HSP104 and related ATP-dependent Clp proteases		KOG
11116_Transcript_1/2_Confidence_1.000_Length_541_45	541	At1g76860	98	91.75	97	8	0	33	323	1	97	6e-32	135	[A] KOG3460 Small nuclear ribonucleoprotein (snRNP) LSM3		KOG
11121_Transcript_1/1_Confidence_1.000_Length_1276_45	1276	At1g58140	1320	50.36	413	204	1	5	1240	344	756	2e-120	431	[R] KOG0017 FOG: Transposon-encoded proteins with TYA, reverse transcriptase, integrase domains in various combinations		KOG
11131_Transcript_4/8_Confidence_0.130_Length_670_45	670	At2g16000	1454	40.87	115	67	1	349	5	427	540	2e-16	84.3	[R] KOG0017 FOG: Transposon-encoded proteins with TYA, reverse transcriptase, integrase domains in various combinations		KOG
11131_Transcript_5/8_Confidence_0.391_Length_749_45	749	At1g36620	1152	33.71	89	47	2	264	34	473	561	3e-06	50.8	[R] KOG0017 FOG: Transposon-encoded proteins with TYA, reverse transcriptase, integrase domains in various combinations		KOG
11131_Transcript_6/8_Confidence_0.522_Length_1807_45	1807	LOC_OS02G06140_PlantCyc_LOC_OS02G06140.1-MONOMER	1559	27.09	203	131	8	564	1	355	555	5e-11	64.3	0	0	PlantCyc
11145_Transcript_1/1_Confidence_1.000_Length_557_45	557	FKBP1_ARATH	232	81.19	101	18	1	557	255	128	227	4e-42	167	Full=Probable FKBP-type peptidyl-prolyl cis-trans isomerase 1, chloroplastic;	Arabidopsis thaliana (Mouse-ear cress).	Swiss-Prot
11148_Transcript_1/1_Confidence_1.000_Length_693_45	693	G7KF14_MEDTR	116	39.73	73	44	0	314	96	23	95	1e-10	67.8		Medicago truncatula (Barrel medic) (Medicago tribuloides).	TrEMBL
11150_Transcript_1/1_Confidence_1.000_Length_206_45	206	CLV1_ARATH	980	64.62	65	23	0	201	7	664	728	2e-20	93.6	Full=Receptor protein kinase CLAVATA1;	Arabidopsis thaliana (Mouse-ear cress).	Swiss-Prot
11155_Transcript_1/1_Confidence_1.000_Length_385_45	385	At2g16950	827	66.67	63	19	1	196	378	26	88	1e-20	84.7	[YU] KOG2023 Nuclear transport receptor Karyopherin-beta2/Transportin (importin beta superfamily)		KOG
11156_Transcript_1/1_Confidence_1.000_Length_613_45	613	F6H3G1_VITVI	1537	56.41	39	17	0	495	611	73	111	4e-06	52.4		Vitis vinifera (Grape).	TrEMBL
11160_Transcript_1/2_Confidence_1.000_Length_1525_45	1525	PERK7_ARATH	699	53.4	324	134	3	1198	278	306	629	7e-81	298	Full=Proline-rich receptor-like protein kinase PERK7;	Arabidopsis thaliana (Mouse-ear cress).	Swiss-Prot
11161_Transcript_1/1_Confidence_1.000_Length_214_45	214	B9S1U2_RICCO	413	83.33	30	5	0	212	123	383	412	4e-07	54.7		Ricinus communis (Castor bean).	TrEMBL
11168_Transcript_1/1_Confidence_1.000_Length_1015_45	1015	At1g10090	246	57.26	234	100	0	178	879	1	234	1e-77	288	[R] KOG1134 Uncharacterized conserved protein		KOG
11177_Transcript_1/1_Confidence_1.000_Length_321_45	321	ARFI_ORYSJ	673	61.17	103	40	0	3	311	8	110	7e-33	135	Full=Auxin response factor 9;	Oryza sativa subsp. japonica (Rice).	Swiss-Prot
1117_Transcript_3/4_Confidence_0.692_Length_2161_45	2161	CPGP1_ZINOF	221	76.19	84	19	1	544	795	25	107	6e-37	131	Full=Zingipain-1;	Zingiber officinale (Ginger) (Amomum zingiber).	Swiss-Prot
11180_Transcript_1/1_Confidence_1.000_Length_290_45	290	PP357_ARATH	834	48.05	77	40	0	2	232	757	833	9e-17	81.6	Full=Pentatricopeptide repeat-containing protein At4g39530;	Arabidopsis thaliana (Mouse-ear cress).	Swiss-Prot
11205_Transcript_1/1_Confidence_1.000_Length_3316_45	3316	D7TVG1_VITVI	1479	32.15	955	538	29	398	2986	28	964	1e-104	383		Vitis vinifera (Grape).	TrEMBL
11212_Transcript_1/1_Confidence_1.000_Length_282_45	282	F2DJA0_HORVD	1234	45.35	86	40	3	3	254	470	550	5e-10	64.3		Hordeum vulgare var. distichum (Two-rowed barley).	TrEMBL
11214_Transcript_4/4_Confidence_0.625_Length_934_45	934	B9F572_ORYSJ	298	44.23	156	85	2	665	201	97	251	7e-25	115		Oryza sativa subsp. japonica (Rice).	TrEMBL
11226_Transcript_1/1_Confidence_1.000_Length_957_45	957	ALA2_PANMI	482	75	144	36	0	407	838	339	482	1e-47	187	Full=Alanine aminotransferase 2;	Panicum miliaceum (Proso millet) (Broomcorn millet).	Swiss-Prot
11233_Transcript_1/2_Confidence_1.000_Length_1142_45	1142	Q0DN81_ORYSJ	667	55.38	130	58	0	752	1141	299	428	2e-37	117		Oryza sativa subsp. japonica (Rice).	TrEMBL
11244_Transcript_1/2_Confidence_1.000_Length_2016_45	2016	At2g41670	391	38.9	365	199	8	1410	373	28	387	4e-61	234	[R] KOG2485 Conserved ATP/GTP binding protein		KOG
11248_Transcript_1/1_Confidence_1.000_Length_852_45	852	At3g01820	219	62.79	129	47	1	840	454	56	183	2e-38	158	[F] KOG3078 Adenylate kinase		KOG
11277_Transcript_1/1_Confidence_1.000_Length_2234_45	2234	At1g54710	942	40.14	725	349	22	1	2049	252	933	5e-118	424	[R] KOG2109 WD40 repeat protein		KOG
11278_Transcript_1/1_Confidence_1.000_Length_1467_45	1467	At1g24310	377	54.73	402	147	3	1443	265	1	376	5e-92	337	[YU] KOG3091 Nuclear pore complex, p54 component (sc Nup57)		KOG
11280_Transcript_2/2_Confidence_1.000_Length_1231_45	1231	LAX5_MEDTR	490	87.56	201	24	1	152	751	5	205	3e-102	368	Full=Auxin transporter-like protein 5;	Medicago truncatula (Barrel medic) (Medicago tribuloides).	Swiss-Prot
11284_Transcript_1/1_Confidence_1.000_Length_313_45	313	At1g25510	483	65.38	104	29	2	313	2	174	270	1e-25	112	[O] KOG1339 Aspartyl protease		KOG
11286_Transcript_1/1_Confidence_1.000_Length_1472_45	1472	D7U7F7_VITVI	659	70.83	408	101	6	1472	282	258	658	5e-146	519		Vitis vinifera (Grape).	TrEMBL
11288_Transcript_1/4_Confidence_0.700_Length_2718_45	2718	Y1689_ARATH	357	65.4	211	45	2	836	219	170	357	8e-60	229	Full=Uncharacterized membrane protein At1g06890;	Arabidopsis thaliana (Mouse-ear cress).	Swiss-Prot
1129_Transcript_1/1_Confidence_1.000_Length_971_45	971	MAD26_ORYSJ	222	61.14	229	80	5	879	196	1	221	1e-67	253	Full=MADS-box transcription factor 26;	Oryza sativa subsp. japonica (Rice).	Swiss-Prot
112_Transcript_1/1_Confidence_1.000_Length_1355_45	1355	MYB44_ARATH	305	45.73	328	129	8	158	1123	3	287	6e-65	244	Full=Transcription factor MYB44;	Arabidopsis thaliana (Mouse-ear cress).	Swiss-Prot
1130_Transcript_1/2_Confidence_1.000_Length_1800_45	1800	PP361_ARATH	852	50.74	542	232	9	25	1602	329	851	5e-143	504	Full=Pentatricopeptide repeat-containing protein At5g02830, chloroplastic;	Arabidopsis thaliana (Mouse-ear cress).	Swiss-Prot
11318_Transcript_1/1_Confidence_1.000_Length_1293_45	1293	At5g52660	334	59.46	259	93	4	1183	416	38	287	3e-60	231	[O] KOG0724 Zuotin and related molecular chaperones (DnaJ superfamily), contains DNA-binding domains		KOG
1131_Transcript_1/3_Confidence_0.600_Length_585_45	585	At1g63690	519	79.75	79	16	0	238	2	290	368	1e-31	134	[R] KOG2442 Uncharacterized conserved protein, contains PA domain		KOG
1131_Transcript_2/3_Confidence_0.600_Length_1409_45	1409	At1g63690	519	69.32	352	106	2	1292	240	16	366	1e-133	475	[R] KOG2442 Uncharacterized conserved protein, contains PA domain		KOG
11325_Transcript_1/3_Confidence_0.714_Length_1103_45	1103	At3g10320	494	34.62	234	147	3	823	134	47	278	9e-35	146	[S] KOG4698 Uncharacterized conserved protein		KOG
1132_Transcript_2/3_Confidence_0.600_Length_600_45	600	Y5815_ARATH	785	77.78	27	6	0	1	81	755	781	3e-06	48.1	Full=Probably inactive leucine-rich repeat receptor-like protein kinase At5g58150;	Arabidopsis thaliana (Mouse-ear cress).	Swiss-Prot
11335_Transcript_3/3_Confidence_0.667_Length_931_45	931	At1g32790	358	78.4	125	27	0	692	318	198	322	2e-52	204	[R] KOG0118 FOG: RRM domain		KOG
11340_Transcript_1/1_Confidence_1.000_Length_5675_45	5675	YIL082w-a	1498	32.55	341	203	7	4635	5642	610	928	2e-39	164	[R] KOG0017 FOG: Transposon-encoded proteins with TYA, reverse transcriptase, integrase domains in various combinations		KOG
11351_Transcript_1/2_Confidence_1.000_Length_302_45	302	AB25G_ARATH	662	40.82	147	40	3	3	302	290	436	9e-22	98.2	Full=ABC transporter G family member 25;	Arabidopsis thaliana (Mouse-ear cress).	Swiss-Prot
11364_Transcript_1/1_Confidence_1.000_Length_304_45	304	B6U140_MAIZE	498	82.14	28	5	0	127	210	323	350	2e-12	52		Zea mays (Maize).	TrEMBL
11373_Transcript_1/1_Confidence_1.000_Length_2661_45	2661	At1g62310	883	48.8	709	332	13	2489	396	189	877	0	689	[K] KOG1356 Putative transcription factor 5qNCA, contains JmjC domain		KOG
11381_Transcript_1/2_Confidence_1.000_Length_4186_45	4186	LOC_OS01G14200_PlantCyc_LOC_OS01G14200.1-MONOMER	2513	37.87	882	507	9	1650	4184	503	1380	3e-165	577	0	0	PlantCyc
11399_Transcript_1/1_Confidence_1.000_Length_295_45	295	KATAM_ORYSJ	588	63.64	99	35	1	295	2	249	347	2e-36	146	Full=Xyloglucan galactosyltransferase KATAMARI1 homolog;	Oryza sativa subsp. japonica (Rice).	Swiss-Prot
11406_Transcript_1/1_Confidence_1.000_Length_590_45	590	LOC_OS08G16570_PlantCyc_LOC_OS08G16570.1-MONOMER	269	83.08	195	33	0	587	3	42	236	3e-85	308	0	0	PlantCyc
11408_Transcript_1/2_Confidence_1.000_Length_2599_45	2599	Y1559_ARATH	653	69.95	559	157	4	363	2033	104	653	0	691	Full=DUF21 domain-containing protein At1g55930, chloroplastic;	Arabidopsis thaliana (Mouse-ear cress).	Swiss-Prot
11411_Transcript_1/1_Confidence_1.000_Length_885_45	885	LOC_OS11G07910_PlantCyc_LOC_OS11G07910.1-MONOMER	593	95.93	172	7	0	883	368	422	593	9e-82	298	0	0	PlantCyc
11413_Transcript_1/1_Confidence_1.000_Length_508_45	508	TL29_ARATH	349	80.77	104	20	0	506	195	246	349	2e-44	174	Full=Thylakoid lumenal 29 kDa protein, chloroplastic;	Arabidopsis thaliana (Mouse-ear cress).	Swiss-Prot
11429_Transcript_1/1_Confidence_1.000_Length_224_45	224	LOC_OS03G20700_PlantCyc_LOC_OS03G20700.1-MONOMER	1387	85.14	74	11	0	223	2	566	639	2e-34	138	0	0	PlantCyc
1142_Transcript_5/9_Confidence_0.480_Length_1138_45	1138	EMBP1_WHEAT	354	60.81	74	29	0	690	469	247	320	9e-19	91.3	Full=DNA-binding protein EMBP-1;	Triticum aestivum (Wheat).	Swiss-Prot
1142_Transcript_6/9_Confidence_0.600_Length_1506_45	1506	EMBP1_WHEAT	354	53.19	94	37	1	562	302	247	340	8e-21	98.6	Full=DNA-binding protein EMBP-1;	Triticum aestivum (Wheat).	Swiss-Prot
1142_Transcript_7/9_Confidence_0.480_Length_1422_45	1422	HBP1A_WHEAT	349	27.73	256	155	10	1392	652	8	242	4e-34	82	Full=Transcription factor HBP-1a;	Triticum aestivum (Wheat).	Swiss-Prot
1142_Transcript_8/9_Confidence_0.120_Length_1090_45	1090	F2E9M3_HORVD	681	86.67	30	4	0	91	2	458	487	8e-07	56.2		Hordeum vulgare var. distichum (Two-rowed barley).	TrEMBL
11434_Transcript_1/2_Confidence_1.000_Length_590_45	590	IKU2_ARATH	991	54.5	200	82	4	1	588	760	954	2e-51	198	Full=Receptor-like protein kinase HAIKU2;	Arabidopsis thaliana (Mouse-ear cress).	Swiss-Prot
11448_Transcript_1/2_Confidence_1.000_Length_725_45	725	At1g16210	230	65.75	146	49	1	5	442	86	230	1e-37	155	[S] KOG3223 Uncharacterized conserved protein		KOG
1144_Transcript_3/4_Confidence_0.500_Length_882_45	882	SKP1B_ARATH	171	77.84	167	29	1	755	279	5	171	2e-59	226	Full=SKP1-like protein 1B;	Arabidopsis thaliana (Mouse-ear cress).	Swiss-Prot
1145_Transcript_5/8_Confidence_0.667_Length_1993_45	1993	EPN2_ARATH	895	26.81	470	224	17	1992	880	287	735	9e-13	72.4	Full=Clathrin interactor EPSIN 2;	Arabidopsis thaliana (Mouse-ear cress).	Swiss-Prot
11473_Transcript_1/2_Confidence_1.000_Length_1112_45	1112	PTHM_ARATH	219	67.61	213	65	1	351	989	4	212	2e-74	276	Full=Peptidyl-tRNA hydrolase, mitochondrial;	Arabidopsis thaliana (Mouse-ear cress).	Swiss-Prot
11480_Transcript_1/1_Confidence_1.000_Length_828_45	828	TRM51_VITVI	608	76.81	276	63	1	826	2	309	584	7e-121	429	Full=tRNA (guanine(37)-N1)-methyltransferase 1;	Vitis vinifera (Grape).	Swiss-Prot
11481_Transcript_2/2_Confidence_1.000_Length_955_45	955	Q0J0S8_ORYSJ	247	58.92	185	67	2	21	548	63	247	3e-53	210		Oryza sativa subsp. japonica (Rice).	TrEMBL
11486_Transcript_1/1_Confidence_1.000_Length_1071_45	1071	LRK91_ARATH	651	50	364	170	5	1071	1	139	497	1e-92	336	Full=L-type lectin-domain containing receptor kinase IX.1;	Arabidopsis thaliana (Mouse-ear cress).	Swiss-Prot
11488_Transcript_3/4_Confidence_0.615_Length_1207_45	1207	C5Z323_SORBI	383	28.9	346	208	10	1019	36	44	369	8e-22	106		Sorghum bicolor (Sorghum) (Sorghum vulgare).	TrEMBL
11488_Transcript_4/4_Confidence_0.615_Length_1168_45	1168	C5Z323_SORBI	383	29.73	333	209	9	980	36	44	369	3e-23	110		Sorghum bicolor (Sorghum) (Sorghum vulgare).	TrEMBL
11513_Transcript_1/2_Confidence_1.000_Length_1251_45	1251	B9SFD1_RICCO	1033	28.53	382	209	6	1250	132	221	547	3e-38	160		Ricinus communis (Castor bean).	TrEMBL
11515_Transcript_3/4_Confidence_0.625_Length_888_45	888	ANTA_GENTR	469	35.8	257	152	6	34	765	208	464	1e-31	133	Full=Anthocyanin 5-aromatic acyltransferase;	Gentiana triflora (Clustered gentian).	Swiss-Prot
11523_Transcript_1/1_Confidence_1.000_Length_232_45	232	AIL1_ARATH	415	71.23	73	21	0	13	231	188	260	2e-26	113	Full=AP2-like ethylene-responsive transcription factor AIL1;	Arabidopsis thaliana (Mouse-ear cress).	Swiss-Prot
11524_Transcript_1/1_Confidence_1.000_Length_639_45	639	At3g47630	332	64.47	76	26	1	13	237	56	131	4e-24	109	[S] KOG2986 Uncharacterized conserved protein		KOG
11526_Transcript_1/1_Confidence_1.000_Length_429_45	429	UBL5_ARATH	73	97.26	73	2	0	372	154	1	73	3e-37	150	Full=Ubiquitin-like protein 5;	Arabidopsis thaliana (Mouse-ear cress).	Swiss-Prot
1153_Transcript_2/5_Confidence_0.545_Length_1203_45	1203	At3g56460	348	72.61	303	81	1	36	938	1	303	1e-111	402	[CR] KOG1198 Zinc-binding oxidoreductase		KOG
11551_Transcript_1/3_Confidence_0.800_Length_1320_45	1320	LOC_OS01G72970_PlantCyc_LOC_OS01G72970.1-MONOMER	834	30.48	351	221	9	17	1045	481	816	1e-34	142	0	0	PlantCyc
11553_Transcript_1/1_Confidence_1.000_Length_5060_45	5060	GLTB_ORYSJ	1615	85.74	1543	218	1	5052	430	72	1614	0	2679	Full=Ferredoxin-dependent glutamate synthase, chloroplastic;	Oryza sativa subsp. japonica (Rice).	Swiss-Prot
11555_Transcript_1/2_Confidence_1.000_Length_948_45	948	F6HAL0_VITVI	762	53.12	320	139	4	1	948	203	515	4e-88	325		Vitis vinifera (Grape).	TrEMBL
11565_Transcript_3/4_Confidence_0.400_Length_598_45	598	ERF1Z_ARATH	435	92.08	101	7	1	294	596	1	100	3e-46	181	Full=Eukaryotic peptide chain release factor subunit 1-3;	Arabidopsis thaliana (Mouse-ear cress).	Swiss-Prot
11572_Transcript_1/1_Confidence_1.000_Length_285_45	285	Q0DRZ9_ORYSJ	122	52.17	69	32	1	211	8	1	69	4e-07	54.7		Oryza sativa subsp. japonica (Rice).	TrEMBL
11576_Transcript_1/1_Confidence_1.000_Length_278_45	278	LOC_OS04G10434_PlantCyc_LOC_OS04G10434.1-MONOMER	316	53.26	92	42	1	2	277	92	182	8e-22	96.3	0	0	PlantCyc
11587_Transcript_3/4_Confidence_0.667_Length_1141_45	1141	AP2_ARATH	432	75.25	198	45	1	1059	478	131	328	8e-79	290	Full=Floral homeotic protein APETALA 2;	Arabidopsis thaliana (Mouse-ear cress).	Swiss-Prot
11587_Transcript_4/4_Confidence_0.667_Length_1204_45	1204	AP2_ARATH	432	76.41	195	42	1	1122	550	131	325	1e-78	290	Full=Floral homeotic protein APETALA 2;	Arabidopsis thaliana (Mouse-ear cress).	Swiss-Prot
115_Transcript_1/4_Confidence_0.714_Length_1766_45	1766	ORYA_ORYSJ	458	76.32	228	54	0	858	1541	231	458	1e-99	360	Full=Oryzain alpha chain;	Oryza sativa subsp. japonica (Rice).	Swiss-Prot
11601_Transcript_4/6_Confidence_0.400_Length_985_45	985	FRS4_ARATH	732	32.52	123	75	3	385	38	1	122	9e-12	67.8	Full=Protein FAR1-RELATED SEQUENCE 4;	Arabidopsis thaliana (Mouse-ear cress).	Swiss-Prot
11601_Transcript_5/6_Confidence_0.267_Length_845_45	845	VA726_ARATH	220	74.19	31	8	0	657	565	17	47	5e-08	55.1	Full=Putative vesicle-associated membrane protein 726;	Arabidopsis thaliana (Mouse-ear cress).	Swiss-Prot
11608_Transcript_2/2_Confidence_1.000_Length_1986_45	1986	At2g30800	1299	59.04	581	216	5	3	1694	594	1169	0	645	[A] KOG0920 ATP-dependent RNA helicase A		KOG
11621_Transcript_1/1_Confidence_1.000_Length_485_45	485	PCF2_ORYSJ	373	62.22	45	15	1	351	485	52	94	2e-10	61.6	Full=Transcription factor PCF2;	Oryza sativa subsp. japonica (Rice).	Swiss-Prot
11664_Transcript_1/1_Confidence_1.000_Length_1050_45	1050	F6H3A4_VITVI	415	38.46	364	189	10	1048	2	58	401	7e-47	189		Vitis vinifera (Grape).	TrEMBL
11669_Transcript_1/2_Confidence_1.000_Length_697_45	697	Q69K62_ORYSJ	173	57.05	156	67	0	1	468	15	170	2e-26	120		Oryza sativa subsp. japonica (Rice).	TrEMBL
11671_Transcript_7/8_Confidence_0.421_Length_926_45	926	C3RVU4_MUSAC	1442	44.5	218	112	6	921	283	1215	1428	1e-35	151		Musa acuminata subsp. malaccensis.	TrEMBL
11672_Transcript_2/3_Confidence_0.400_Length_826_45	826	At1g49400	116	76.53	98	23	0	693	400	1	98	5e-37	153	[J] KOG1740 Predicted mitochondrial/chloroplast ribosomal protein S17		KOG
11687_Transcript_3/3_Confidence_0.667_Length_1716_45	1716	RPS5_ARATH	889	29.72	498	241	16	3	1370	412	842	3e-40	163	Full=Disease resistance protein RPS5;	Arabidopsis thaliana (Mouse-ear cress).	Swiss-Prot
11688_Transcript_2/2_Confidence_1.000_Length_1007_45	1007	NAT2_ARATH	524	81.68	273	50	0	2	820	252	524	3e-131	464	Full=Nucleobase-ascorbate transporter 2;	Arabidopsis thaliana (Mouse-ear cress).	Swiss-Prot
11690_Transcript_1/1_Confidence_1.000_Length_787_45	787	Y1570_ARATH	852	39.92	263	144	6	1	774	241	494	3e-42	168	Full=Probable LRR receptor-like serine/threonine-protein kinase At1g05700;	Arabidopsis thaliana (Mouse-ear cress).	Swiss-Prot
11696_Transcript_3/3_Confidence_0.667_Length_531_45	531	Q10NK5_ORYSJ	394	85.19	54	8	0	529	368	340	393	1e-20	100		Oryza sativa subsp. japonica (Rice).	TrEMBL
11711_Transcript_3/3_Confidence_0.714_Length_1926_45	1926	KSG1_ARATH	405	87.04	409	49	1	1636	410	1	405	0	737	Full=Shaggy-related protein kinase alpha;	Arabidopsis thaliana (Mouse-ear cress).	Swiss-Prot
11722_Transcript_1/1_Confidence_1.000_Length_272_45	272	Y4141_ARATH	206	76.14	88	20	1	264	1	26	112	3e-38	152	Full=Uncharacterized protein At4g14100;	Arabidopsis thaliana (Mouse-ear cress).	Swiss-Prot
11731_Transcript_2/2_Confidence_1.000_Length_1271_45	1271	KS1_ORYSJ	756	60.27	375	146	3	1252	128	374	745	2e-129	458	Full=Ent-kaur-16-ene synthase, chloroplastic;	Oryza sativa subsp. japonica (Rice).	Swiss-Prot
11739_Transcript_1/1_Confidence_1.000_Length_380_45	380	Q7X9E3_PHAVU	69	81.43	70	12	1	371	162	1	69	3e-26	118		Phaseolus vulgaris (Kidney bean) (French bean).	TrEMBL
1173_Transcript_1/1_Confidence_1.000_Length_1883_45	1883	ARR11_ARATH	521	64.39	278	90	5	2	820	10	283	4e-93	339	Full=Two-component response regulator ARR11;	Arabidopsis thaliana (Mouse-ear cress).	Swiss-Prot
11745_Transcript_1/2_Confidence_1.000_Length_387_45	387	GUFP_VITVI	680	91.23	57	5	0	119	289	82	138	2e-24	107	Full=Translation factor GUF1 homolog, chloroplastic;	Vitis vinifera (Grape).	Swiss-Prot
11747_Transcript_1/1_Confidence_1.000_Length_1184_45	1184	Q5ZDH9_ORYSJ	671	34.69	196	92	8	684	205	476	671	1e-16	89.4		Oryza sativa subsp. japonica (Rice).	TrEMBL
11752_Transcript_1/2_Confidence_1.000_Length_798_45	798	UBC20_ARATH	180	58.58	169	46	1	20	526	31	175	6e-50	194	Full=Ubiquitin-conjugating enzyme E2 20;	Arabidopsis thaliana (Mouse-ear cress).	Swiss-Prot
11758_Transcript_1/1_Confidence_1.000_Length_222_45	222	DXS_ORYSJ	720	84.93	73	10	1	222	4	605	676	3e-29	123	Full=Probable 1-deoxy-D-xylulose-5-phosphate synthase, chloroplastic;	Oryza sativa subsp. japonica (Rice).	Swiss-Prot
11771_Transcript_1/1_Confidence_1.000_Length_724_45	724	RGA3_SOLBU	992	41.01	178	88	2	133	666	530	690	4e-24	108	Full=Putative disease resistance protein RGA3;	Solanum bulbocastanum (Wild potato).	Swiss-Prot
11779_Transcript_2/4_Confidence_0.600_Length_750_45	750	At1g31300	278	55.26	152	68	0	749	294	124	275	1e-45	181	[TR] KOG4561 Uncharacterized conserved protein, contains TBC domain		KOG
11781_Transcript_1/4_Confidence_0.727_Length_1596_45	1596	Y5519_ARATH	615	23.3	352	205	13	1255	212	9	299	4e-09	59.7	Full=Uncharacterized protein At5g05190;	Arabidopsis thaliana (Mouse-ear cress).	Swiss-Prot
11785_Transcript_1/1_Confidence_1.000_Length_686_45	686	HS181_ARATH	161	45.68	162	78	2	116	580	1	159	2e-25	112	Full=18.1 kDa class I heat shock protein;	Arabidopsis thaliana (Mouse-ear cress).	Swiss-Prot
11797_Transcript_3/4_Confidence_0.700_Length_1991_45	1991	B9SFJ5_RICCO	204	40.45	220	110	4	267	917	1	202	1e-29	132		Ricinus communis (Castor bean).	TrEMBL
11812_Transcript_2/3_Confidence_0.556_Length_1536_45	1536	PERK1_ARATH	652	47.83	115	55	3	1205	1534	268	382	7e-22	102	Full=Proline-rich receptor-like protein kinase PERK1;	Arabidopsis thaliana (Mouse-ear cress).	Swiss-Prot
11824_Transcript_1/3_Confidence_0.500_Length_541_45	541	B9SMZ8_RICCO	358	62.79	43	16	0	372	500	36	78	2e-10	58.5		Ricinus communis (Castor bean).	TrEMBL
11825_Transcript_4/5_Confidence_0.583_Length_250_45	250	IDEF1_ORYSJ	362	72	50	14	0	90	239	248	297	6e-15	75.5	Full=B3 domain-containing protein IDEF1;	Oryza sativa subsp. japonica (Rice).	Swiss-Prot
11831_Transcript_1/1_Confidence_1.000_Length_872_45	872	AB11B_ARATH	1278	63.2	269	99	0	66	872	21	289	7e-92	333	Full=ABC transporter B family member 11;	Arabidopsis thaliana (Mouse-ear cress).	Swiss-Prot
11843_Transcript_1/1_Confidence_1.000_Length_536_45	536	Q9SBZ0_PlantCyc_MONOMER-12482	857	58.9	163	64	1	48	536	1	160	3e-51	195	stachyose synthase	Vigna angularis	PlantCyc
11846_Transcript_1/1_Confidence_1.000_Length_417_45	417	SUBL_ARATH	757	52.85	123	48	2	415	74	565	686	1e-31	131	Full=Subtilisin-like protease;	Arabidopsis thaliana (Mouse-ear cress).	Swiss-Prot
11848_Transcript_1/2_Confidence_1.000_Length_976_45	976	F6HQY0_VITVI	361	67.74	217	70	0	935	285	123	339	1e-84	314		Vitis vinifera (Grape).	TrEMBL
1184_Transcript_1/1_Confidence_1.000_Length_214_45	214	At5g43900	1505	63.04	46	17	0	138	1	1396	1441	4e-11	64.7	[Z] KOG0160 Myosin class V heavy chain		KOG
11854_Transcript_7/7_Confidence_0.647_Length_1424_45	1424	At5g01990	431	66	50	17	0	1169	1020	18	67	1e-12	73.2	[S] KOG2722 Predicted membrane protein		KOG
11878_Transcript_1/1_Confidence_1.000_Length_1079_45	1079	Q7XQP5_ORYSA	157	60.65	155	58	1	227	682	1	155	3e-34	147		Oryza sativa (Rice).	TrEMBL
11880_Transcript_1/3_Confidence_0.600_Length_564_45	564	2AAB_ARATH	587	76.67	60	14	0	232	411	526	585	4e-20	94.4	Full=Serine/threonine-protein phosphatase 2A 65 kDa regulatory subunit A beta isoform;	Arabidopsis thaliana (Mouse-ear cress).	Swiss-Prot
11892_Transcript_1/1_Confidence_1.000_Length_842_45	842	Y4294_ARATH	1037	82.99	194	32	1	2	580	844	1037	2e-85	312	Full=Probable LRR receptor-like serine/threonine-protein kinase At4g20940;	Arabidopsis thaliana (Mouse-ear cress).	Swiss-Prot
11894_Transcript_1/1_Confidence_1.000_Length_1423_45	1423	ATL46_ARATH	376	52.29	350	131	8	1026	28	38	368	2e-80	296	Full=RING-H2 finger protein ATL46;	Arabidopsis thaliana (Mouse-ear cress).	Swiss-Prot
11897_Transcript_1/2_Confidence_1.000_Length_864_45	864	C0PCN5_MAIZE	405	66.32	193	54	2	24	569	164	356	1e-69	264		Zea mays (Maize).	TrEMBL
11907_Transcript_1/1_Confidence_1.000_Length_292_45	292	SUT34_ARATH	653	64.95	97	34	0	292	2	249	345	2e-34	140	Full=Probable sulfate transporter 3.4;	Arabidopsis thaliana (Mouse-ear cress).	Swiss-Prot
11909_Transcript_1/1_Confidence_1.000_Length_1997_45	1997	PTR28_ARATH	575	57.3	555	234	1	125	1789	18	569	0	651	Full=Putative peptide/nitrate transporter At2g37900;	Arabidopsis thaliana (Mouse-ear cress).	Swiss-Prot
11923_Transcript_1/1_Confidence_1.000_Length_431_45	431	At5g02600	304	61.82	55	21	0	166	2	226	280	3e-15	79	[P] KOG1603 Copper chaperone		KOG
11926_Transcript_1/1_Confidence_1.000_Length_428_45	428	RS2_ORYSJ	342	65.08	126	43	1	378	4	207	332	3e-47	183	Full=Protein rough sheath 2 homolog;	Oryza sativa subsp. japonica (Rice).	Swiss-Prot
1192_Transcript_2/3_Confidence_0.667_Length_689_45	689	At3g51730	213	44.93	138	76	0	3	416	67	204	2e-30	130	[IG] KOG1340 Prosaposin		KOG
11932_Transcript_1/4_Confidence_0.667_Length_1554_45	1554	LOC_OS03G19280_PlantCyc_LOC_OS03G19280.1-MONOMER	519	80.73	275	53	0	727	1551	234	508	3e-128	453	0	0	PlantCyc
11943_Transcript_2/3_Confidence_0.667_Length_2342_45	2342	Y5129_ARATH	613	71.99	607	170	0	219	2039	7	613	0	823	Full=Probable LRR receptor-like serine/threonine-protein kinase At5g10290;	Arabidopsis thaliana (Mouse-ear cress).	Swiss-Prot
11957_Transcript_1/2_Confidence_1.000_Length_3091_45	3091	UBP23_ARATH	859	60.74	433	158	6	183	1472	18	441	2e-145	513	Full=Ubiquitin carboxyl-terminal hydrolase 23;	Arabidopsis thaliana (Mouse-ear cress).	Swiss-Prot
11981_Transcript_1/1_Confidence_1.000_Length_1085_45	1085	NRAM5_ORYSJ	538	71.51	337	83	3	2	973	201	537	6e-124	440	Full=Metal transporter Nramp5;	Oryza sativa subsp. japonica (Rice).	Swiss-Prot
11994_Transcript_1/1_Confidence_1.000_Length_267_45	267	Q7Y1E2_ORYSJ	463	62.5	88	33	0	1	264	158	245	4e-25	114		Oryza sativa subsp. japonica (Rice).	TrEMBL
11999_Transcript_1/3_Confidence_0.600_Length_848_45	848	At5g14030	193	63.06	157	56	1	113	583	26	180	1e-47	188	[U] KOG3317 Translocon-associated complex TRAP, beta subunit		KOG
12001_Transcript_2/4_Confidence_0.600_Length_1269_45	1269	B9FQI4_ORYSJ	336	81.11	90	16	1	664	930	247	336	2e-38	161		Oryza sativa subsp. japonica (Rice).	TrEMBL
12005_Transcript_1/1_Confidence_1.000_Length_848_45	848	PP258_ARATH	659	67.23	177	58	0	2	532	483	659	3e-73	271	Full=Pentatricopeptide repeat-containing protein At3g26782, mitochondrial;	Arabidopsis thaliana (Mouse-ear cress).	Swiss-Prot
12019_Transcript_1/1_Confidence_1.000_Length_720_45	720	At1g32090	806	77.93	145	32	0	1	435	575	719	2e-47	187	[R] KOG1134 Uncharacterized conserved protein		KOG
12021_Transcript_1/1_Confidence_1.000_Length_232_45	232	G7IHU0_MEDTR	1588	46.15	78	41	1	1	231	1163	1240	6e-13	73.9		Medicago truncatula (Barrel medic) (Medicago tribuloides).	TrEMBL
1202_Transcript_1/1_Confidence_1.000_Length_2107_45	2107	PEK13_ARATH	710	43.96	323	174	4	1218	265	335	655	3e-69	259	Full=Proline-rich receptor-like protein kinase PERK13;	Arabidopsis thaliana (Mouse-ear cress).	Swiss-Prot
12035_Transcript_1/1_Confidence_1.000_Length_542_45	542	O23864_9ORYZ	1317	44.87	78	43	0	308	541	38	115	9e-21	70.5		Oryza australiensis.	TrEMBL
12038_Transcript_1/1_Confidence_1.000_Length_391_45	391	PGR5_ARATH	133	88.73	71	8	0	390	178	63	133	2e-26	114	Full=Protein PROTON GRADIENT REGULATION 5, chloroplastic;	Arabidopsis thaliana (Mouse-ear cress).	Swiss-Prot
12039_Transcript_1/1_Confidence_1.000_Length_1937_45	1937	DRL21_ARATH	1424	27.23	481	310	10	135	1526	150	607	2e-34	144	Full=Putative disease resistance protein At3g14460;	Arabidopsis thaliana (Mouse-ear cress).	Swiss-Prot
1204_Transcript_1/2_Confidence_1.000_Length_3950_45	3950	DUT_SOLLC	169	44.03	134	74	1	1717	1319	34	167	3e-25	114	Full=Deoxyuridine 5'-triphosphate nucleotidohydrolase;	Solanum lycopersicum (Tomato) (Lycopersicon esculentum).	Swiss-Prot
12053_Transcript_1/1_Confidence_1.000_Length_806_45	806	D7KHI3_ARALL	201	48.5	200	100	3	163	753	1	200	3e-39	163		Arabidopsis lyrata subsp. lyrata (Lyre-leaved rock-cress).	TrEMBL
12060_Transcript_1/3_Confidence_0.714_Length_2412_45	2412	At5g65620	714	78.36	707	128	1	2214	169	6	712	0	1100	[O] KOG2089 Metalloendopeptidase family - saccharolysin & thimet oligopeptidase		KOG
12089_Transcript_1/3_Confidence_0.500_Length_1230_45	1230	At4g38360	466	69.82	285	67	1	946	92	1	266	4e-113	406	[T] KOG2641 Predicted seven transmembrane receptor - rhodopsin family		KOG
1208_Transcript_1/2_Confidence_1.000_Length_813_45	813	At5g66730	500	75.86	58	14	0	638	811	25	82	1e-18	92.4	[R] KOG1721 FOG: Zn-finger		KOG
12096_Transcript_2/2_Confidence_1.000_Length_1016_45	1016	FER3_MAIZE	152	76.42	106	25	0	435	752	47	152	3e-43	172	Full=Ferredoxin-3, chloroplastic;	Zea mays (Maize).	Swiss-Prot
120_Transcript_1/3_Confidence_0.444_Length_886_45	886	HACL_ARATH	572	75.47	106	26	0	274	591	467	572	2e-44	176	Full=2-hydroxyacyl-CoA lyase;	Arabidopsis thaliana (Mouse-ear cress).	Swiss-Prot
12108_Transcript_1/1_Confidence_1.000_Length_767_45	767	GEML1_ARATH	259	55.96	193	83	2	703	125	64	254	1e-61	232	Full=GEM-like protein 1;	Arabidopsis thaliana (Mouse-ear cress).	Swiss-Prot
1211_Transcript_1/3_Confidence_0.500_Length_1919_45	1919	BH004_ARATH	589	43.64	550	244	13	255	1757	57	589	7e-108	388	Full=Transcription factor MYC4;	Arabidopsis thaliana (Mouse-ear cress).	Swiss-Prot
12123_Transcript_1/1_Confidence_1.000_Length_382_45	382	NAT1_ARATH	520	73.4	94	25	0	382	101	427	520	2e-39	157	Full=Nucleobase-ascorbate transporter 1;	Arabidopsis thaliana (Mouse-ear cress).	Swiss-Prot
12124_Transcript_1/1_Confidence_1.000_Length_275_45	275	F6I6X6_VITVI	223	67.19	64	20	1	271	80	161	223	1e-16	85.9		Vitis vinifera (Grape).	TrEMBL
12130_Transcript_1/1_Confidence_1.000_Length_314_45	314	E135_ARATH	484	58.14	43	13	1	200	313	7	49	2e-07	50.8	Full=Glucan endo-1,3-beta-glucosidase 5;	Arabidopsis thaliana (Mouse-ear cress).	Swiss-Prot
12136_Transcript_1/1_Confidence_1.000_Length_596_45	596	B9GM23_POPTR	1093	37.07	205	104	7	584	3	3	193	2e-09	63.5		Populus trichocarpa (Western balsam poplar) (Populus balsamifera subsp. trichocarpa).	TrEMBL
12137_Transcript_1/1_Confidence_1.000_Length_941_45	941	PP241_ARATH	1440	65.88	296	100	1	3	887	1124	1419	3e-115	411	Full=Pentatricopeptide repeat-containing protein At3g18110, chloroplastic;	Arabidopsis thaliana (Mouse-ear cress).	Swiss-Prot
1213_Transcript_6/9_Confidence_0.591_Length_1799_45	1799	G7JR64_MEDTR	574	29.5	200	130	4	1201	1791	285	476	7e-20	100		Medicago truncatula (Barrel medic) (Medicago tribuloides).	TrEMBL
12143_Transcript_1/2_Confidence_1.000_Length_2320_45	2320	At1g03520	447	62.47	437	154	6	1867	566	18	447	8e-159	559	[G] KOG0799 Branching enzyme		KOG
12147_Transcript_1/1_Confidence_1.000_Length_653_45	653	EIL3_ARATH	567	69.09	110	33	1	332	3	16	124	3e-30	128	Full=ETHYLENE INSENSITIVE 3-like 3 protein;	Arabidopsis thaliana (Mouse-ear cress).	Swiss-Prot
12160_Transcript_1/1_Confidence_1.000_Length_1831_45	1831	Y4294_ARATH	1037	62.19	611	219	6	2	1828	266	866	0	687	Full=Probable LRR receptor-like serine/threonine-protein kinase At4g20940;	Arabidopsis thaliana (Mouse-ear cress).	Swiss-Prot
12162_Transcript_3/3_Confidence_0.833_Length_1691_45	1691	RGA2_SOLBU	970	28.54	459	281	12	1637	267	2	415	1e-38	158	Full=Disease resistance protein RGA2;	Solanum bulbocastanum (Wild potato).	Swiss-Prot
12173_Transcript_1/1_Confidence_1.000_Length_300_45	300	FKB21_ARATH	153	86.49	37	5	0	300	190	108	144	1e-13	71.2	Full=FK506-binding protein 2-1;	Arabidopsis thaliana (Mouse-ear cress).	Swiss-Prot
12175_Transcript_1/1_Confidence_1.000_Length_452_45	452	SPL12_ORYSI	475	45.56	169	72	5	2	451	211	378	4e-31	130	Full=Squamosa promoter-binding-like protein 12;	Oryza sativa subsp. indica (Rice).	Swiss-Prot
12186_Transcript_1/1_Confidence_1.000_Length_361_45	361	DOF36_ARATH	323	39.62	106	54	2	289	2	1	106	1e-13	71.2	Full=Dof zinc finger protein DOF3.6;	Arabidopsis thaliana (Mouse-ear cress).	Swiss-Prot
12195_Transcript_3/3_Confidence_0.600_Length_1269_45	1269	BETL2_ARATH	134	68.09	47	15	0	75	215	17	63	4e-11	66.2	Full=Bet1-like protein At1g29060;	Arabidopsis thaliana (Mouse-ear cress).	Swiss-Prot
12209_Transcript_1/1_Confidence_1.000_Length_3703_45	3703	At3g24320	1022	65.33	1024	331	5	270	3320	2	1008	0	1336	[L] KOG0217 Mismatch repair ATPase MSH6 (MutS family)		KOG
12211_Transcript_1/1_Confidence_1.000_Length_747_45	747	FENR1_PEA	360	90.67	225	21	0	1	675	136	360	8e-121	429	Full=Ferredoxin--NADP reductase, leaf isozyme, chloroplastic;	Pisum sativum (Garden pea).	Swiss-Prot
12226_Transcript_1/1_Confidence_1.000_Length_268_45	268	LOC_OS08G07360_PlantCyc_LOC_OS08G07360.1-MONOMER	1395	50.56	89	42	1	266	6	403	491	1e-18	85.9	0	0	PlantCyc
1222_Transcript_2/4_Confidence_0.700_Length_2085_45	2085	CE09493	891	31.97	147	95	4	1233	802	13	157	2e-07	56.6	[R] KOG1075 FOG: Reverse transcriptase		KOG
12233_Transcript_1/1_Confidence_1.000_Length_696_45	696	GLR31_ORYSJ	938	53.85	234	106	1	696	1	201	434	3e-71	264	Full=Glutamate receptor 3.1;	Oryza sativa subsp. japonica (Rice).	Swiss-Prot
12237_Transcript_1/1_Confidence_1.000_Length_513_45	513	At2g07350	68	76.79	56	13	0	158	325	8	63	8e-18	88.2	[O] KOG3501 Molecular chaperone Prefoldin, subunit 1		KOG
12238_Transcript_1/2_Confidence_1.000_Length_1496_45	1496	BT4_ARATH	372	50.83	360	171	2	1262	183	5	358	3e-107	385	Full=BTB/POZ and TAZ domain-containing protein 4;	Arabidopsis thaliana (Mouse-ear cress).	Swiss-Prot
12246_Transcript_1/1_Confidence_1.000_Length_298_45	298	WRK11_ARATH	325	56.76	74	29	1	214	2	1	74	1e-14	74.7	Full=Probable WRKY transcription factor 11;	Arabidopsis thaliana (Mouse-ear cress).	Swiss-Prot
12250_Transcript_1/2_Confidence_1.000_Length_637_45	637	At1g60690	345	53.98	113	50	1	118	456	231	341	2e-28	124	[C] KOG1575 Voltage-gated shaker-like K+ channel, subunit beta/KCNAB		KOG
12252_Transcript_1/3_Confidence_0.500_Length_465_45	465	At1g21150	390	40.62	64	37	1	1	189	321	384	1e-06	50.4	[KR] KOG1267 Mitochondrial transcription termination factor, mTERF		KOG
12270_Transcript_1/4_Confidence_0.625_Length_1607_45	1607	MOCOS_ORYSJ	824	60.27	292	100	5	1569	724	143	428	3e-130	328	Full=Molybdenum cofactor sulfurase;	Oryza sativa subsp. japonica (Rice).	Swiss-Prot
12273_Transcript_1/1_Confidence_1.000_Length_256_45	256	At5g46920	735	73.81	84	22	0	3	254	137	220	2e-32	135	[R] KOG1075 FOG: Reverse transcriptase		KOG
12281_Transcript_1/2_Confidence_1.000_Length_1203_45	1203	At4g30100	1311	55.47	128	42	2	181	561	475	588	2e-32	138	[A] KOG1801 tRNA-splicing endonuclease positive effector (SEN1)		KOG
12284_Transcript_1/1_Confidence_1.000_Length_738_45	738	B8AEH1_ORYSI	688	23.58	246	152	8	722	54	456	688	1e-06	54.7		Oryza sativa subsp. indica (Rice).	TrEMBL
12315_Transcript_1/1_Confidence_1.000_Length_951_45	951	PKS4_ARATH	406	29.07	289	135	12	863	33	52	282	3e-11	65.9	Full=Protein PHYTOCHROME KINASE SUBSTRATE 4;	Arabidopsis thaliana (Mouse-ear cress).	Swiss-Prot
12326_Transcript_1/1_Confidence_1.000_Length_793_45	793	A5BED8_VITVI	126	72.88	118	31	1	131	484	10	126	4e-44	179		Vitis vinifera (Grape).	TrEMBL
12332_Transcript_1/2_Confidence_1.000_Length_840_45	840	Q677C5_HYAOR	173	75.61	164	32	2	736	260	9	169	1e-62	241		Hyacinthus orientalis (Common hyacinth).	TrEMBL
12333_Transcript_1/2_Confidence_1.000_Length_781_45	781	Q7XLG8_ORYSJ	137	73	100	27	0	688	389	22	121	2e-34	147		Oryza sativa subsp. japonica (Rice).	TrEMBL
12342_Transcript_2/2_Confidence_1.000_Length_669_45	669	YIPL_SOLTU	129	74.6	126	32	0	537	160	4	129	2e-55	212	Full=Protein yippee-like;	Solanum tuberosum (Potato).	Swiss-Prot
12344_Transcript_1/1_Confidence_1.000_Length_493_45	493	Y3972_ARATH	261	50.88	57	28	0	492	322	6	62	5e-09	57	Full=Uncharacterized protein At3g49720;	Arabidopsis thaliana (Mouse-ear cress).	Swiss-Prot
12355_Transcript_1/1_Confidence_1.000_Length_478_45	478	Q6L4X6_ORYSJ	604	46.75	169	75	5	2	478	131	294	5e-34	144		Oryza sativa subsp. japonica (Rice).	TrEMBL
12365_Transcript_1/1_Confidence_1.000_Length_596_45	596	LOC_OS01G53330_PlantCyc_LOC_OS01G53330.1-MONOMER	479	46.58	146	67	3	183	596	4	146	5e-27	115	0	0	PlantCyc
12371_Transcript_1/3_Confidence_0.778_Length_959_45	959	At2g31660	1037	55.2	221	89	2	957	325	806	1026	6e-47	186	[YU] KOG1991 Nuclear transport receptor RANBP7/RANBP8 (importin beta superfamily)		KOG
12373_Transcript_1/5_Confidence_0.364_Length_334_45	334	EXLB1_ORYSJ	256	77.19	57	13	0	204	34	28	84	3e-22	99.8	Full=Expansin-like B1;	Oryza sativa subsp. japonica (Rice).	Swiss-Prot
12373_Transcript_4/5_Confidence_0.636_Length_607_45	607	EXLB1_ORYSJ	256	73.81	42	11	0	356	231	47	88	6e-17	71.2	Full=Expansin-like B1;	Oryza sativa subsp. japonica (Rice).	Swiss-Prot
12379_Transcript_1/1_Confidence_1.000_Length_1425_45	1425	At2g38000	419	57.91	430	166	5	1423	137	3	418	3e-146	516	[O] KOG2813 Predicted molecular chaperone, contains DnaJ domain		KOG
12382_Transcript_1/1_Confidence_1.000_Length_680_45	680	Q6YXX9_ORYSJ	150	68.54	89	28	0	520	254	59	147	2e-29	130		Oryza sativa subsp. japonica (Rice).	TrEMBL
12390_Transcript_1/1_Confidence_1.000_Length_254_45	254	LOC_OS07G39070_PlantCyc_LOC_OS07G39070.1-MONOMER	282	57.58	66	24	1	67	252	44	109	1e-15	75.5	0	0	PlantCyc
12395_Transcript_2/4_Confidence_0.545_Length_496_45	496	B6SRQ6_MAIZE	261	61.62	99	28	2	90	356	112	210	1e-24	113		Zea mays (Maize).	TrEMBL
12395_Transcript_3/4_Confidence_0.545_Length_758_45	758	F6I4N1_VITVI	476	75	56	14	0	88	255	152	207	2e-19	97.1		Vitis vinifera (Grape).	TrEMBL
1239_Transcript_1/1_Confidence_1.000_Length_299_45	299	At4g04410	1017	58.97	39	16	0	287	171	803	841	1e-08	49.7	[R] KOG0017 FOG: Transposon-encoded proteins with TYA, reverse transcriptase, integrase domains in various combinations		KOG
123_Transcript_3/8_Confidence_0.619_Length_1600_45	1600	PWD_ORYSJ	1206	26.37	201	137	7	525	1124	51	241	3e-09	60.1	Full=Phosphoglucan, water dikinase, chloroplastic;	Oryza sativa subsp. japonica (Rice).	Swiss-Prot
12408_Transcript_1/1_Confidence_1.000_Length_908_45	908	Q10MN7_ORYSJ	508	62.16	259	96	2	2	775	123	380	1e-89	331		Oryza sativa subsp. japonica (Rice).	TrEMBL
12421_Transcript_1/1_Confidence_1.000_Length_3055_45	3055	UBP5_ARATH	924	62	921	328	10	76	2805	6	915	0	1099	Full=Ubiquitin carboxyl-terminal hydrolase 5;	Arabidopsis thaliana (Mouse-ear cress).	Swiss-Prot
12422_Transcript_1/1_Confidence_1.000_Length_369_45	369	Q9CA69_ARATH	397	54.39	114	48	1	342	1	39	148	1e-29	129		Arabidopsis thaliana (Mouse-ear cress).	TrEMBL
12426_Transcript_1/2_Confidence_1.000_Length_980_45	980	A5AQZ2_VITVI	647	38.34	193	114	2	971	405	59	250	2e-28	127		Vitis vinifera (Grape).	TrEMBL
12435_Transcript_1/1_Confidence_1.000_Length_392_45	392	CIPKB_ARATH	435	38.33	120	71	2	392	39	251	369	1e-16	81.6	Full=CBL-interacting serine/threonine-protein kinase 11;	Arabidopsis thaliana (Mouse-ear cress).	Swiss-Prot
12443_Transcript_1/3_Confidence_0.429_Length_322_45	322	B9RT05_RICCO	399	58	50	21	0	1	150	276	325	3e-10	65.1		Ricinus communis (Castor bean).	TrEMBL
12449_Transcript_1/1_Confidence_1.000_Length_726_45	726	RAX2_ARATH	298	77.46	71	16	0	3	215	41	111	2e-30	129	Full=Transcription factor RAX2;	Arabidopsis thaliana (Mouse-ear cress).	Swiss-Prot
12453_Transcript_1/1_Confidence_1.000_Length_693_45	693	At1g25430	1213	32.17	230	138	8	664	17	69	294	7e-20	95.9	[R] KOG1075 FOG: Reverse transcriptase		KOG
12456_Transcript_2/2_Confidence_1.000_Length_497_45	497	NDB3B_ARATH	73	64.06	64	21	1	37	222	1	64	2e-18	88.6	Full=NADH dehydrogenase [ubiquinone] 1 beta subcomplex subunit 3-B;	Arabidopsis thaliana (Mouse-ear cress).	Swiss-Prot
12457_Transcript_1/1_Confidence_1.000_Length_289_45	289	At1g23990	657	35.56	90	58	0	18	287	131	220	3e-11	65.1	[R] KOG1075 FOG: Reverse transcriptase		KOG
12465_Transcript_1/1_Confidence_1.000_Length_282_45	282	Q5JKC7_ORYSJ	508	85	80	12	0	241	2	261	340	1e-36	152		Oryza sativa subsp. japonica (Rice).	TrEMBL
12466_Transcript_1/1_Confidence_1.000_Length_247_45	247	F6HHT2_VITVI	332	65.43	81	26	1	1	243	138	216	4e-25	114		Vitis vinifera (Grape).	TrEMBL
1246_Transcript_1/4_Confidence_0.500_Length_721_45	721	UBC28_ARATH	148	74.42	172	19	1	39	554	1	147	6e-72	266	Full=Ubiquitin-conjugating enzyme E2 28;	Arabidopsis thaliana (Mouse-ear cress).	Swiss-Prot
1246_Transcript_2/4_Confidence_0.375_Length_582_45	582	UBC28_ARATH	148	86.39	147	20	0	39	479	1	147	4e-76	280	Full=Ubiquitin-conjugating enzyme E2 28;	Arabidopsis thaliana (Mouse-ear cress).	Swiss-Prot
12474_Transcript_1/2_Confidence_1.000_Length_797_45	797	C5Z2R9_SORBI	518	53.52	142	56	3	2	427	106	237	1e-32	141		Sorghum bicolor (Sorghum) (Sorghum vulgare).	TrEMBL
12483_Transcript_2/2_Confidence_1.000_Length_475_45	475	B9HKF0_POPTR	440	55.77	52	19	2	473	330	67	118	4e-08	58.2		Populus trichocarpa (Western balsam poplar) (Populus balsamifera subsp. trichocarpa).	TrEMBL
12485_Transcript_1/1_Confidence_1.000_Length_775_45	775	Q9SLE0_PlantCyc_AT2G16790-MONOMER	189	53.33	165	77	0	716	222	24	188	8e-44	171	shikimate kinase	Arabidopsis thaliana	PlantCyc
12487_Transcript_3/5_Confidence_0.636_Length_7116_45	7116	EMB8_PICGL	457	33.13	335	209	7	6815	5850	113	445	3e-39	162	Full=Embryogenesis-associated protein EMB8;	Picea glauca (White spruce) (Pinus glauca).	Swiss-Prot
12494_Transcript_1/1_Confidence_1.000_Length_1199_45	1199	At3g14450	327	58.9	292	112	2	49	924	43	326	3e-83	307	[R] KOG0118 FOG: RRM domain		KOG
12499_Transcript_1/1_Confidence_1.000_Length_1202_45	1202	PSKR1_DAUCA	1021	43.73	343	158	4	205	1200	28	346	7e-46	181	Full=Phytosulfokine receptor 1;	Daucus carota (Carrot).	Swiss-Prot
12508_Transcript_1/7_Confidence_0.700_Length_2089_45	2089	7304089	224	31.03	174	99	3	1269	1733	15	186	1e-16	87.4	[A] KOG4209 Splicing factor RNPS1, SR protein superfamily		KOG
12508_Transcript_2/7_Confidence_0.700_Length_2255_45	2255	At3g12640	674	48.78	82	42	0	1612	1857	511	592	3e-16	85.9	[A] KOG3702 Nuclear polyadenylated RNA binding protein		KOG
12510_Transcript_1/1_Confidence_1.000_Length_347_45	347	PME25_ARATH	619	66.97	109	36	0	20	346	332	440	7e-40	158	Full=Probable pectinesterase/pectinesterase inhibitor 25;	Arabidopsis thaliana (Mouse-ear cress).	Swiss-Prot
12514_Transcript_1/1_Confidence_1.000_Length_228_45	228	Q53NR4_ORYSJ	1488	57.14	56	21	1	160	2	1174	1229	2e-10	65.5		Oryza sativa subsp. japonica (Rice).	TrEMBL
12515_Transcript_1/1_Confidence_1.000_Length_603_45	603	LOC_OS10G14920_PlantCyc_LOC_OS10G14920.1-MONOMER	364	70.76	171	50	0	524	12	1	171	1e-68	253	0	0	PlantCyc
12517_Transcript_5/5_Confidence_0.500_Length_454_45	454	Q9SXB2_ARATH	1352	48.84	43	22	0	296	424	343	385	3e-12	50.4		Arabidopsis thaliana (Mouse-ear cress).	TrEMBL
1251_Transcript_2/3_Confidence_0.778_Length_2567_45	2567	At4g39680	633	39.89	697	335	19	212	2260	3	629	4e-94	345	[B] KOG2416 Acinus (induces apoptotic chromatin condensation)		KOG
12525_Transcript_1/1_Confidence_1.000_Length_369_45	369	At4g03130	765	57	100	43	0	69	368	550	649	2e-30	129	[KTDL] KOG2043 Signaling protein SWIFT and related BRCT domain proteins		KOG
12534_Transcript_2/3_Confidence_0.750_Length_2412_45	2412	Q5QLC6_ORYSJ	729	75	52	13	0	1214	1369	678	729	3e-14	82.4		Oryza sativa subsp. japonica (Rice).	TrEMBL
12534_Transcript_3/3_Confidence_0.750_Length_2492_45	2492	Q5QLC6_ORYSJ	729	75	52	13	0	1294	1449	678	729	3e-14	82.4		Oryza sativa subsp. japonica (Rice).	TrEMBL
12537_Transcript_1/2_Confidence_1.000_Length_398_45	398	ATPY_SOLTU	25	76	25	6	0	11	85	1	25	1e-06	48.1	Full=ATP synthase 6 kDa subunit, mitochondrial;	Solanum tuberosum (Potato).	Swiss-Prot
1253_Transcript_8/10_Confidence_0.533_Length_4051_45	4051	At5g65460	1264	66.32	1241	382	11	4047	340	54	1263	0	1436	[Z] KOG0239 Kinesin (KAR3 subfamily)		KOG
12541_Transcript_4/5_Confidence_0.364_Length_1571_45	1571	SWT2A_ORYSJ	243	71.11	225	64	1	1280	606	19	242	3e-90	329	Full=Bidirectional sugar transporter SWEET2a;	Oryza sativa subsp. japonica (Rice).	Swiss-Prot
12542_Transcript_1/1_Confidence_1.000_Length_478_45	478	A1KXJ6_ELAGV	399	64.86	37	13	0	3	113	362	398	1e-07	56.6		Elaeis guineensis var. tenera (Oil palm).	TrEMBL
12551_Transcript_2/3_Confidence_0.667_Length_427_45	427	LOC_OS03G18070_PlantCyc_LOC_OS03G18070.1-MONOMER	458	83.72	86	14	0	425	168	150	235	4e-53	174	0	0	PlantCyc
12560_Transcript_1/2_Confidence_1.000_Length_1082_45	1082	D7T2D2_VITVI	280	49.55	111	55	1	345	16	93	203	4e-12	73.9		Vitis vinifera (Grape).	TrEMBL
12577_Transcript_1/1_Confidence_1.000_Length_405_45	405	CIPK4_ORYSJ	454	71.43	98	27	1	293	3	19	116	2e-33	137	Full=CBL-interacting protein kinase 4;	Oryza sativa subsp. japonica (Rice).	Swiss-Prot
12584_Transcript_1/2_Confidence_1.000_Length_295_45	295	RS29_WHEAT	56	95	20	1	0	77	136	1	20	2e-06	47.4	Full=40S ribosomal protein S29;	Triticum aestivum (Wheat).	Swiss-Prot
12605_Transcript_1/1_Confidence_1.000_Length_820_45	820	PP449_ARATH	620	38.86	175	107	0	820	296	350	524	3e-34	142	Full=Pentatricopeptide repeat-containing protein At5g66520;	Arabidopsis thaliana (Mouse-ear cress).	Swiss-Prot
12617_Transcript_3/6_Confidence_0.583_Length_2724_45	2724	B9S5A1_RICCO	863	37.95	867	500	17	64	2607	16	863	1e-123	445		Ricinus communis (Castor bean).	TrEMBL
12626_Transcript_1/1_Confidence_1.000_Length_220_45	220	At1g48710	1352	63.64	77	24	1	2	220	517	593	1e-19	93.2	[R] KOG0017 FOG: Transposon-encoded proteins with TYA, reverse transcriptase, integrase domains in various combinations		KOG
12649_Transcript_2/3_Confidence_0.500_Length_929_45	929	At2g37540	321	67.19	192	63	0	715	140	1	192	1e-52	197	[Q] KOG1208 Dehydrogenases with different specificities (related to short-chain alcohol dehydrogenases)		KOG
12654_Transcript_1/2_Confidence_1.000_Length_532_45	532	ALDO3_ORYSJ	1356	64.64	181	59	4	3	530	113	293	2e-63	237	Full=Probable aldehyde oxidase 3;	Oryza sativa subsp. japonica (Rice).	Swiss-Prot
12659_Transcript_3/6_Confidence_0.667_Length_1277_45	1277	PP2A_TOBAC	312	93.55	310	19	1	1121	195	3	312	5e-176	613	Full=Serine/threonine-protein phosphatase PP2A catalytic subunit;	Nicotiana tabacum (Common tobacco).	Swiss-Prot
12659_Transcript_5/6_Confidence_0.600_Length_2007_45	2007	PP2A2_ORYSJ	307	92.53	174	13	0	716	195	134	307	5e-98	355	Full=Serine/threonine-protein phosphatase PP2A-2 catalytic subunit;	Oryza sativa subsp. japonica (Rice).	Swiss-Prot
1265_Transcript_1/2_Confidence_1.000_Length_1593_45	1593	B9SW92_RICCO	352	54.95	313	128	6	201	1130	50	352	2e-75	285		Ricinus communis (Castor bean).	TrEMBL
12688_Transcript_1/2_Confidence_1.000_Length_1393_45	1393	At2g43370	292	74.86	175	38	1	53	577	5	173	8e-65	246	[A] KOG0113 U1 small nuclear ribonucleoprotein (RRM superfamily)		KOG
12688_Transcript_2/2_Confidence_1.000_Length_1236_45	1236	At2g43370	292	62.5	240	78	3	53	760	5	236	2e-68	258	[A] KOG0113 U1 small nuclear ribonucleoprotein (RRM superfamily)		KOG
1268_Transcript_5/5_Confidence_0.300_Length_1001_45	1001	R10A1_ARATH	216	87.04	216	28	0	87	734	1	216	7e-95	343	Full=60S ribosomal protein L10a-1;	Arabidopsis thaliana (Mouse-ear cress).	Swiss-Prot
12690_Transcript_3/3_Confidence_0.667_Length_1184_45	1184	ACFR1_ARATH	239	64.88	205	72	0	1	615	20	224	7e-64	241	Full=Transmembrane ascorbate ferrireductase 1;	Arabidopsis thaliana (Mouse-ear cress).	Swiss-Prot
12696_Transcript_1/1_Confidence_1.000_Length_228_45	228	RKF3_ARATH	617	52	75	35	1	1	225	106	179	4e-17	82.8	Full=Probable LRR receptor-like serine/threonine-protein kinase RKF3;	Arabidopsis thaliana (Mouse-ear cress).	Swiss-Prot
12717_Transcript_1/1_Confidence_1.000_Length_515_45	515	PAP8_ARATH	239	74.24	132	34	0	1	396	107	238	8e-56	212	Full=Probable plastid-lipid-associated protein 8, chloroplastic;	Arabidopsis thaliana (Mouse-ear cress).	Swiss-Prot
12725_Transcript_1/1_Confidence_1.000_Length_249_45	249	2AAG_ARATH	587	68.75	80	25	0	248	9	508	587	2e-28	120	Full=Serine/threonine-protein phosphatase 2A 65 kDa regulatory subunit A gamma isoform;	Arabidopsis thaliana (Mouse-ear cress).	Swiss-Prot
12727_Transcript_3/3_Confidence_0.600_Length_986_45	986	CHIP_ARATH	278	44.05	168	91	1	963	469	23	190	9e-53	139	Full=E3 ubiquitin-protein ligase CHIP;	Arabidopsis thaliana (Mouse-ear cress).	Swiss-Prot
12728_Transcript_1/2_Confidence_1.000_Length_1893_45	1893	At1g22540	570	50.56	447	187	7	538	1797	127	566	6e-110	397	[E] KOG1237 H+/oligopeptide symporter		KOG
12732_Transcript_2/3_Confidence_0.667_Length_1462_45	1462	C5WPF6_SORBI	311	52.65	226	105	1	753	1424	86	311	1e-50	202		Sorghum bicolor (Sorghum) (Sorghum vulgare).	TrEMBL
12739_Transcript_2/2_Confidence_1.000_Length_693_45	693	NDUS6_ARATH	110	81.25	32	6	0	307	402	75	106	3e-17	62.8	Full=NADH dehydrogenase [ubiquinone] iron-sulfur protein 6, mitochondrial;	Arabidopsis thaliana (Mouse-ear cress).	Swiss-Prot
12774_Transcript_3/3_Confidence_0.600_Length_1370_45	1370	D7UCP2_VITVI	368	59.9	202	74	5	675	1259	167	368	4e-108	222		Vitis vinifera (Grape).	TrEMBL
12779_Transcript_1/1_Confidence_1.000_Length_1060_45	1060	C5YRG8_SORBI	1524	37.59	399	198	4	16	1059	3	401	4e-49	196		Sorghum bicolor (Sorghum) (Sorghum vulgare).	TrEMBL
12789_Transcript_2/2_Confidence_1.000_Length_455_45	455	B2_DAUCA	207	89.66	29	3	0	3	89	130	158	1e-09	58.9	Full=B2 protein;	Daucus carota (Carrot).	Swiss-Prot
1278_Transcript_13/14_Confidence_0.308_Length_2652_45	2652	EIN3_ARATH	628	56.53	444	169	9	1878	571	66	493	3e-137	486	Full=Protein ETHYLENE INSENSITIVE 3;	Arabidopsis thaliana (Mouse-ear cress).	Swiss-Prot
1278_Transcript_9/14_Confidence_0.231_Length_2460_45	2460	EIN3_ARATH	628	56.43	459	175	10	1919	564	53	493	6e-139	491	Full=Protein ETHYLENE INSENSITIVE 3;	Arabidopsis thaliana (Mouse-ear cress).	Swiss-Prot
12796_Transcript_1/2_Confidence_1.000_Length_820_45	820	B9SSZ0_RICCO	294	72.51	171	47	0	564	52	122	292	4e-71	269		Ricinus communis (Castor bean).	TrEMBL
127_Transcript_2/5_Confidence_0.667_Length_2913_45	2913	F6HMG9_VITVI	871	38.63	888	477	23	125	2689	1	853	7e-129	463		Vitis vinifera (Grape).	TrEMBL
12835_Transcript_1/1_Confidence_1.000_Length_292_45	292	NLP2_ORYSJ	936	60.42	96	38	0	3	290	199	294	4e-31	129	Full=Protein NLP2;	Oryza sativa subsp. japonica (Rice).	Swiss-Prot
12844_Transcript_1/1_Confidence_1.000_Length_537_45	537	F2EJQ8_HORVD	650	46.15	65	19	1	196	2	285	333	3e-08	59.3		Hordeum vulgare var. distichum (Two-rowed barley).	TrEMBL
12847_Transcript_1/1_Confidence_1.000_Length_921_45	921	E1UHL2_MUSBA	1064	42.35	85	49	0	296	42	1	85	6e-08	59.7		Musa balbisiana (Banana).	TrEMBL
1284_Transcript_1/5_Confidence_0.765_Length_1032_45	1032	PCKA1_UROPA	624	83.75	160	26	0	506	985	465	624	4e-151	279	Full=Phosphoenolpyruvate carboxykinase [ATP] 1;	Urochloa panicoides (Panic liverseed grass).	Swiss-Prot
12852_Transcript_1/1_Confidence_1.000_Length_1153_45	1153	At3g07030	485	74.02	127	33	0	67	447	1	127	1e-49	196	[S] KOG2567 Uncharacterized conserved protein		KOG
12860_Transcript_1/1_Confidence_1.000_Length_546_45	546	RS2_MAIZE	370	89.29	112	12	0	337	2	1	112	4e-57	217	Full=Protein rough sheath 2;	Zea mays (Maize).	Swiss-Prot
12867_Transcript_1/1_Confidence_1.000_Length_274_45	274	At1g61000_1	567	35.56	90	57	1	8	274	47	136	4e-13	71.6	[D] KOG4438 Centromere-associated protein NUF2		KOG
12868_Transcript_1/1_Confidence_1.000_Length_1018_45	1018	At3g21260	103	44	100	56	0	523	822	3	102	4e-21	100	[G] KOG3221 Glycolipid transfer protein		KOG
12887_Transcript_2/3_Confidence_0.400_Length_1695_45	1695	VATH_ORYSJ	452	74.72	451	111	1	150	1493	1	451	0	688	Full=Probable V-type proton ATPase subunit H;	Oryza sativa subsp. japonica (Rice).	Swiss-Prot
1288_Transcript_5/10_Confidence_0.097_Length_664_45	664	CMTA2_ARATH	1050	61.79	123	46	1	295	660	900	1022	3e-39	158	Full=Calmodulin-binding transcription activator 2;	Arabidopsis thaliana (Mouse-ear cress).	Swiss-Prot
12897_Transcript_1/1_Confidence_1.000_Length_1864_45	1864	F6GSY2_VITVI	531	26.57	542	313	14	2	1513	35	529	6e-32	140		Vitis vinifera (Grape).	TrEMBL
1289_Transcript_1/1_Confidence_1.000_Length_1575_45	1575	B6T7K0_MAIZE	295	40.06	312	161	10	236	1144	1	295	7e-45	183		Zea mays (Maize).	TrEMBL
128_Transcript_1/2_Confidence_1.000_Length_2356_45	2356	C5XV66_SORBI	737	60.37	641	243	8	57	1967	104	737	0	719		Sorghum bicolor (Sorghum) (Sorghum vulgare).	TrEMBL
12904_Transcript_2/3_Confidence_0.688_Length_1817_45	1817	GLGS_BRANA	520	90.47	472	42	1	1639	224	52	520	0	865	Full=Glucose-1-phosphate adenylyltransferase small subunit, chloroplastic;	Brassica napus (Rape).	Swiss-Prot
12908_Transcript_1/1_Confidence_1.000_Length_1082_45	1082	MYB4_ORYSJ	257	49.03	259	108	5	157	867	1	257	5e-59	224	Full=Myb-related protein Myb4;	Oryza sativa subsp. japonica (Rice).	Swiss-Prot
12954_Transcript_1/1_Confidence_1.000_Length_673_45	673	Y3720_ARATH	476	37.36	174	106	2	19	531	285	458	2e-28	122	Full=UPF0481 protein At3g47200;	Arabidopsis thaliana (Mouse-ear cress).	Swiss-Prot
12960_Transcript_3/3_Confidence_0.667_Length_2389_45	2389	At3g18290	1254	73.12	346	90	2	17	1048	909	1253	7e-156	550	[R] KOG1940 Zn-finger protein		KOG
12961_Transcript_2/2_Confidence_1.000_Length_394_45	394	SCL15_ARATH	486	35.71	126	71	3	14	388	262	378	2e-11	64.3	Full=Scarecrow-like protein 15;	Arabidopsis thaliana (Mouse-ear cress).	Swiss-Prot
12974_Transcript_1/1_Confidence_1.000_Length_618_45	618	B9SWF5_RICCO	1157	62.86	35	13	0	553	449	608	642	1e-07	57.8		Ricinus communis (Castor bean).	TrEMBL
12984_Transcript_1/1_Confidence_1.000_Length_529_45	529	LECA_CASCR	309	46.59	88	47	0	4	267	222	309	2e-19	92	Full=Agglutinin;	Castanea crenata (Japanese chestnut).	Swiss-Prot
12988_Transcript_1/1_Confidence_1.000_Length_627_45	627	YUC5_ARATH	424	61.54	208	80	0	2	625	201	408	2e-75	278	Full=Flavin-containing monooxygenase YUCCA5;	Arabidopsis thaliana (Mouse-ear cress).	Swiss-Prot
12998_Transcript_1/4_Confidence_0.667_Length_1515_45	1515	At5g13690	806	59.78	184	73	1	733	1281	622	805	1e-60	232	[U] KOG2233 Alpha-N-acetylglucosaminidase		KOG
1299_Transcript_1/2_Confidence_1.000_Length_703_45	703	XTH25_ARATH	284	64.13	184	40	1	553	2	28	185	2e-67	251	Full=Probable xyloglucan endotransglucosylase/hydrolase protein 25;	Arabidopsis thaliana (Mouse-ear cress).	Swiss-Prot
1299_Transcript_2/2_Confidence_1.000_Length_625_45	625	XTH25_ARATH	284	74.68	158	40	0	475	2	28	185	9e-72	266	Full=Probable xyloglucan endotransglucosylase/hydrolase protein 25;	Arabidopsis thaliana (Mouse-ear cress).	Swiss-Prot
13005_Transcript_1/1_Confidence_1.000_Length_524_45	524	At4g03810	964	51.46	171	83	0	522	10	444	614	5e-50	195	[R] KOG0017 FOG: Transposon-encoded proteins with TYA, reverse transcriptase, integrase domains in various combinations		KOG
1300_Transcript_1/2_Confidence_1.000_Length_1038_45	1038	B9IN78_POPTR	290	40.24	246	140	3	54	770	42	287	9e-32	139		Populus trichocarpa (Western balsam poplar) (Populus balsamifera subsp. trichocarpa).	TrEMBL
13020_Transcript_3/5_Confidence_0.545_Length_1206_45	1206	HASTY_ARATH	1202	60.06	333	133	0	1155	157	19	351	4e-114	408	Full=Protein HASTY 1;	Arabidopsis thaliana (Mouse-ear cress).	Swiss-Prot
1302_Transcript_2/5_Confidence_0.500_Length_544_45	544	BURP3_ORYSJ	429	52.25	111	52	1	338	6	194	303	2e-22	101	Full=BURP domain-containing protein 3;	Oryza sativa subsp. japonica (Rice).	Swiss-Prot
13034_Transcript_2/3_Confidence_0.600_Length_571_45	571	BCCIP_ARATH	326	53	100	46	1	491	195	154	253	2e-25	112	Full=Protein BCCIP homolog;	Arabidopsis thaliana (Mouse-ear cress).	Swiss-Prot
13043_Transcript_1/1_Confidence_1.000_Length_481_45	481	P2C30_ORYSJ	404	43.98	166	59	4	1	480	36	173	3e-25	110	Full=Probable protein phosphatase 2C 30;	Oryza sativa subsp. japonica (Rice).	Swiss-Prot
13048_Transcript_1/1_Confidence_1.000_Length_1879_45	1879	PTR14_ARATH	614	69.73	565	157	7	1879	206	41	598	0	773	Full=Nitrate transporter 1.5;	Arabidopsis thaliana (Mouse-ear cress).	Swiss-Prot
13050_Transcript_1/2_Confidence_1.000_Length_526_45	526	At4g39480	516	61.17	103	40	0	519	211	414	516	2e-34	143	[QI] KOG0157 Cytochrome P450 CYP4/CYP19/CYP26 subfamilies		KOG
13053_Transcript_10/11_Confidence_0.500_Length_2131_45	2131	At5g10630_2	462	79.56	137	27	1	412	2	40	175	7e-52	183	[J] KOG0458 Elongation factor 1 alpha		KOG
13053_Transcript_6/11_Confidence_0.469_Length_1991_45	1991	At5g10630_2	462	77.39	115	25	1	346	2	62	175	1e-47	142	[J] KOG0458 Elongation factor 1 alpha		KOG
13059_Transcript_1/1_Confidence_1.000_Length_463_45	463	A5C6R1_VITVI	958	62.99	154	51	3	1	462	193	340	3e-48	191		Vitis vinifera (Grape).	TrEMBL
13061_Transcript_1/1_Confidence_1.000_Length_367_45	367	At5g03560_2	483	54.1	122	55	1	2	367	216	336	1e-29	126	[FH] KOG2466 Uridine permease/thiamine transporter/allantoin transport		KOG
13064_Transcript_2/4_Confidence_0.600_Length_755_45	755	At5g01990	431	85.45	55	8	0	587	751	134	188	2e-22	104	[S] KOG2722 Predicted membrane protein		KOG
13066_Transcript_1/1_Confidence_1.000_Length_1074_45	1074	VA721_ARATH	219	87.21	219	28	0	911	255	1	219	3e-98	355	Full=Vesicle-associated membrane protein 721;	Arabidopsis thaliana (Mouse-ear cress).	Swiss-Prot
13070_Transcript_1/1_Confidence_1.000_Length_421_45	421	A5C3S7_VITVI	1193	55.68	88	39	0	322	59	103	190	2e-22	105		Vitis vinifera (Grape).	TrEMBL
1307_Transcript_2/2_Confidence_1.000_Length_4571_45	4571	At2g03150	1276	54.35	184	76	2	1669	2211	472	650	7e-49	195	[R] KOG4246 Predicted DNA-binding protein, contains SAP domain		KOG
13087_Transcript_1/2_Confidence_1.000_Length_615_45	615	At5g54580	156	80.77	78	15	0	484	251	56	133	2e-31	134	[R] KOG0118 FOG: RRM domain		KOG
13094_Transcript_1/1_Confidence_1.000_Length_720_45	720	Q9M3V1_FAGSY	413	48.08	52	13	1	356	469	300	351	4e-06	44.7		Fagus sylvatica (Beechnut).	TrEMBL
1310_Transcript_2/3_Confidence_0.750_Length_2645_45	2645	PRR73_ORYSI	767	53.78	781	311	15	199	2463	11	767	1e-162	570	Full=Two-component response regulator-like PRR73;	Oryza sativa subsp. indica (Rice).	Swiss-Prot
13113_Transcript_1/1_Confidence_1.000_Length_422_45	422	BEE3_ARATH	261	76.4	89	20	1	1	267	147	234	1e-32	134	Full=Transcription factor BEE 3;	Arabidopsis thaliana (Mouse-ear cress).	Swiss-Prot
13116_Transcript_2/5_Confidence_0.600_Length_459_45	459	C5WVK9_SORBI	217	63.89	36	13	0	113	6	5	40	5e-08	57.8		Sorghum bicolor (Sorghum) (Sorghum vulgare).	TrEMBL
13120_Transcript_1/1_Confidence_1.000_Length_486_45	486	NPY1_ARATH	571	63.64	110	40	0	155	484	1	110	3e-37	150	Full=BTB/POZ domain-containing protein NPY1;	Arabidopsis thaliana (Mouse-ear cress).	Swiss-Prot
13136_Transcript_1/1_Confidence_1.000_Length_239_45	239	At1g61350	573	49.3	71	36	0	21	233	94	164	6e-16	80.9	[S] KOG0167 FOG: Armadillo/beta-catenin-like repeats		KOG
13151_Transcript_5/5_Confidence_0.556_Length_1615_45	1615	Q9LUZ6_PlantCyc_AT5G58600-MONOMER	402	23.98	342	236	8	475	1476	68	393	3e-22	101	UDP glycosyltransferase	Arabidopsis thaliana	PlantCyc
13167_Transcript_3/3_Confidence_0.667_Length_1362_45	1362	LOC_OS06G14490_PlantCyc_LOC_OS06G14490.1-MONOMER	453	64.38	219	68	2	658	1308	235	445	9e-79	288	0	0	PlantCyc
13172_Transcript_1/1_Confidence_1.000_Length_296_45	296	B8LR98_PICSI	401	48.98	98	47	2	4	294	229	324	9e-12	70.1		Picea sitchensis (Sitka spruce) (Pinus sitchensis).	TrEMBL
13173_Transcript_2/4_Confidence_0.600_Length_6077_45	6077	At4g27010	2535	33.97	2055	1206	49	6047	3	557	2500	0	916	[S] KOG1791 Uncharacterized conserved protein		KOG
13175_Transcript_1/1_Confidence_1.000_Length_219_45	219	Q7X7C8_ORYSJ	918	63.89	36	13	0	110	217	807	842	8e-07	53.5		Oryza sativa subsp. japonica (Rice).	TrEMBL
13188_Transcript_1/1_Confidence_1.000_Length_349_45	349	C5XWX2_SORBI	473	44.17	120	56	2	2	349	61	173	6e-15	80.5		Sorghum bicolor (Sorghum) (Sorghum vulgare).	TrEMBL
1318_Transcript_2/4_Confidence_0.667_Length_2013_45	2013	At4g30490	447	75.07	377	93	1	582	1709	71	447	2e-165	581	[R] KOG2383 Predicted ATPase		KOG
13190_Transcript_1/2_Confidence_1.000_Length_588_45	588	DNJ20_ARATH	197	62.2	127	44	2	3	374	72	197	1e-34	142	Full=Chaperone protein dnaJ 20, chloroplastic;	Arabidopsis thaliana (Mouse-ear cress).	Swiss-Prot
13199_Transcript_1/4_Confidence_0.667_Length_476_45	476	B8LMI7_PICSI	157	70.31	64	19	0	2	193	90	153	5e-20	97.8		Picea sitchensis (Sitka spruce) (Pinus sitchensis).	TrEMBL
13200_Transcript_1/1_Confidence_1.000_Length_286_45	286	PPR62_ARATH	520	46.39	97	46	3	286	11	108	203	3e-16	80.1	Full=Pentatricopeptide repeat-containing protein At1g28690, mitochondrial;	Arabidopsis thaliana (Mouse-ear cress).	Swiss-Prot
13201_Transcript_1/1_Confidence_1.000_Length_450_45	450	F6HAD9_VITVI	1182	85.33	150	22	0	1	450	810	959	3e-70	264		Vitis vinifera (Grape).	TrEMBL
13204_Transcript_1/1_Confidence_1.000_Length_615_45	615	LOC_OS03G13920_PlantCyc_LOC_OS03G13920.1-MONOMER	1111	27.1	155	104	5	112	576	577	722	1e-10	61.2	0	0	PlantCyc
13210_Transcript_1/2_Confidence_1.000_Length_1365_45	1365	F2DAY6_HORVD	476	72.56	379	93	4	1353	220	81	449	8e-156	551		Hordeum vulgare var. distichum (Two-rowed barley).	TrEMBL
13214_Transcript_1/1_Confidence_1.000_Length_307_45	307	PP272_ARATH	850	45.63	103	55	1	2	307	521	623	4e-24	105	Full=Pentatricopeptide repeat-containing protein At3g49170, chloroplastic;	Arabidopsis thaliana (Mouse-ear cress).	Swiss-Prot
13217_Transcript_1/3_Confidence_0.600_Length_1362_45	1362	SGN-U575810_PlantCyc_SGN-U320189-MONOMER	330	66.87	329	107	1	210	1190	1	329	1e-129	457	FLAVONOL SYNTHASE	Solanum lycopersicum	PlantCyc
1321_Transcript_4/5_Confidence_0.500_Length_1415_45	1415	ZDH22_ARATH	620	75.59	299	73	0	4	900	54	352	0	479	Full=S-acyltransferase TIP1;	Arabidopsis thaliana (Mouse-ear cress).	Swiss-Prot
13228_Transcript_3/9_Confidence_0.619_Length_1461_45	1461	LOC_OS08G44340_PlantCyc_LOC_OS08G44340.1-MONOMER	435	80.86	256	49	0	1	768	73	328	9e-163	422	0	0	PlantCyc
1324_Transcript_1/1_Confidence_1.000_Length_2196_45	2196	At2g13440	723	81.98	655	111	2	2044	86	61	710	0	1023	[J] KOG2311 NAD/FAD-utilizing protein possibly involved in translation		KOG
13252_Transcript_1/1_Confidence_1.000_Length_216_45	216	At1g09800	292	71.43	35	10	0	139	35	51	85	4e-08	55.1	[AJ] KOG4393 Predicted pseudouridylate synthase		KOG
13259_Transcript_1/1_Confidence_1.000_Length_348_45	348	LOX6_ORYSJ	918	80.17	116	22	1	348	4	741	856	3e-51	196	Full=Probable lipoxygenase 6;	Oryza sativa subsp. japonica (Rice).	Swiss-Prot
13260_Transcript_1/1_Confidence_1.000_Length_585_45	585	PP232_ARATH	689	43.09	188	100	1	13	576	377	557	1e-39	159	Full=Putative pentatricopeptide repeat-containing protein At3g15130;	Arabidopsis thaliana (Mouse-ear cress).	Swiss-Prot
13277_Transcript_2/3_Confidence_0.600_Length_1582_45	1582	D7TZ53_VITVI	497	69.27	205	63	0	909	295	184	388	4e-126	292		Vitis vinifera (Grape).	TrEMBL
13280_Transcript_1/1_Confidence_1.000_Length_417_45	417	Q0J4W5_ORYSJ	153	74.03	77	20	0	417	187	77	153	1e-29	129		Oryza sativa subsp. japonica (Rice).	TrEMBL
13285_Transcript_2/3_Confidence_0.667_Length_2275_45	2275	FBW3_ARATH	539	57.92	499	197	4	1683	208	46	538	1e-169	593	Full=F-box/WD-40 repeat-containing protein At5g21040;	Arabidopsis thaliana (Mouse-ear cress).	Swiss-Prot
1328_Transcript_2/10_Confidence_0.357_Length_1362_45	1362	ARFG_ORYSJ	678	78.46	260	54	1	1362	589	136	395	4e-119	424	Full=Auxin response factor 7;	Oryza sativa subsp. japonica (Rice).	Swiss-Prot
13291_Transcript_1/1_Confidence_1.000_Length_763_45	763	PPR23_ARATH	484	49.41	253	126	2	7	762	104	355	3e-69	258	Full=Pentatricopeptide repeat-containing protein At1g09190;	Arabidopsis thaliana (Mouse-ear cress).	Swiss-Prot
13299_Transcript_1/1_Confidence_1.000_Length_509_45	509	APL_ARATH	358	43.9	82	39	1	506	282	140	221	2e-10	61.6	Full=Myb family transcription factor APL;	Arabidopsis thaliana (Mouse-ear cress).	Swiss-Prot
132_Transcript_4/8_Confidence_0.176_Length_510_45	510	LOC_OS05G39770_PlantCyc_LOC_OS05G39770.1-MONOMER	480	83.52	91	15	0	238	510	324	414	4e-39	155	0	0	PlantCyc
13303_Transcript_1/1_Confidence_1.000_Length_773_45	773	ADHL5_ARATH	389	65.28	193	67	0	773	195	197	389	7e-67	250	Full=Alcohol dehydrogenase-like 5;	Arabidopsis thaliana (Mouse-ear cress).	Swiss-Prot
1330_Transcript_1/1_Confidence_1.000_Length_1345_45	1345	Q9SBZ0_PlantCyc_MONOMER-12482	857	53.25	462	201	3	1343	3	147	608	3e-174	606	stachyose synthase	Vigna angularis	PlantCyc
13322_Transcript_1/1_Confidence_1.000_Length_249_45	249	PLCD6_ARATH	613	74.39	82	21	0	2	247	118	199	1e-34	140	Full=Phosphoinositide phospholipase C 6;	Arabidopsis thaliana (Mouse-ear cress).	Swiss-Prot
13323_Transcript_1/1_Confidence_1.000_Length_1063_45	1063	LOC_OS03G18010_PlantCyc_LOC_OS03G18010.1-MONOMER	490	57.3	356	123	5	1061	3	57	386	3e-110	393	0	0	PlantCyc
13327_Transcript_1/1_Confidence_1.000_Length_291_45	291	ACCO4_ARATH	323	49.48	97	49	0	1	291	43	139	3e-24	106	Full=1-aminocyclopropane-1-carboxylate oxidase 4;	Arabidopsis thaliana (Mouse-ear cress).	Swiss-Prot
13332_Transcript_3/8_Confidence_0.500_Length_1250_45	1250	RH56_ARATH	427	91.86	258	21	0	475	1248	70	327	2e-158	483	Full=DEAD-box ATP-dependent RNA helicase 56;	Arabidopsis thaliana (Mouse-ear cress).	Swiss-Prot
13340_Transcript_1/1_Confidence_1.000_Length_748_45	748	D7KX07_ARALL	905	57.78	45	19	0	199	333	52	96	2e-07	57.4		Arabidopsis lyrata subsp. lyrata (Lyre-leaved rock-cress).	TrEMBL
13344_Transcript_1/2_Confidence_1.000_Length_3298_45	3298	BRXL4_ARATH	384	45.88	85	46	0	2731	2985	299	383	3e-17	88.2	Full=Protein Brevis radix-like 4;	Arabidopsis thaliana (Mouse-ear cress).	Swiss-Prot
13370_Transcript_3/4_Confidence_0.500_Length_1817_45	1817	At5g67630	469	78.87	213	44	1	863	1501	250	461	3e-93	341	[K] KOG2680 DNA helicase TIP49, TBP-interacting protein		KOG
13370_Transcript_4/4_Confidence_0.625_Length_1862_45	1862	At5g67630	469	77.73	467	98	3	146	1546	1	461	0	673	[K] KOG2680 DNA helicase TIP49, TBP-interacting protein		KOG
13372_Transcript_1/1_Confidence_1.000_Length_396_45	396	Y3037_ARATH	802	45.38	130	66	3	6	389	328	454	1e-18	88.2	Full=Probable inactive leucine-rich repeat receptor-like protein kinase At3g03770;	Arabidopsis thaliana (Mouse-ear cress).	Swiss-Prot
1337_Transcript_1/1_Confidence_1.000_Length_2584_45	2584	PABP2_ARATH	629	62.66	640	214	5	272	2188	14	629	0	689	Full=Polyadenylate-binding protein 2;	Arabidopsis thaliana (Mouse-ear cress).	Swiss-Prot
13387_Transcript_1/1_Confidence_1.000_Length_212_45	212	SPIN1_ORYSJ	281	76.32	38	8	1	101	211	1	38	7e-09	55.5	Full=KH domain-containing protein SPIN1;	Oryza sativa subsp. japonica (Rice).	Swiss-Prot
1338_Transcript_3/7_Confidence_0.741_Length_6567_45	6567	MOR1_ORYSJ	1997	74.68	2006	474	17	240	6227	16	1997	0	2714	Full=Protein MOR1;	Oryza sativa subsp. japonica (Rice).	Swiss-Prot
13392_Transcript_1/1_Confidence_1.000_Length_339_45	339	NRPD1_ARATH	1453	35.77	123	54	3	336	1	243	351	1e-12	68.2	Full=DNA-directed RNA polymerase D subunit 1;	Arabidopsis thaliana (Mouse-ear cress).	Swiss-Prot
13399_Transcript_1/1_Confidence_1.000_Length_209_45	209	ERL2_ARATH	967	73.91	69	18	0	3	209	410	478	2e-24	107	Full=LRR receptor-like serine/threonine-protein kinase ERL2;	Arabidopsis thaliana (Mouse-ear cress).	Swiss-Prot
13406_Transcript_1/1_Confidence_1.000_Length_600_45	600	B9RJW7_RICCO	216	41.05	95	49	4	269	544	119	209	3e-07	56.2		Ricinus communis (Castor bean).	TrEMBL
13417_Transcript_1/1_Confidence_1.000_Length_926_45	926	LOC_OS02G35700_PlantCyc_LOC_OS02G35700.1-MONOMER	181	63.87	155	54	1	198	662	29	181	5e-54	206	0	0	PlantCyc
13420_Transcript_2/3_Confidence_0.714_Length_1825_45	1825	At3g45100	450	68.63	459	84	4	266	1633	40	441	0	584	[MOI] KOG1111 N-acetylglucosaminyltransferase complex, subunit PIG-A/SPT14, required for phosphatidylinositol biosynthesis/Sulfolipid synthase		KOG
13421_Transcript_1/2_Confidence_1.000_Length_555_45	555	STT7_ARATH	562	80.61	165	32	0	49	543	351	515	7e-77	282	Full=Serine/threonine-protein kinase STN7, chloroplastic;	Arabidopsis thaliana (Mouse-ear cress).	Swiss-Prot
13429_Transcript_1/1_Confidence_1.000_Length_515_45	515	PP163_ARATH	822	60.36	169	67	0	515	9	140	308	6e-56	213	Full=Pentatricopeptide repeat-containing protein At2g18940;	Arabidopsis thaliana (Mouse-ear cress).	Swiss-Prot
13430_Transcript_6/7_Confidence_0.200_Length_1597_45	1597	F2E4M8_HORVD	1859	38.57	70	43	0	405	614	1579	1648	4e-09	44.7	Full=DNA-directed RNA polymerase;	Hordeum vulgare var. distichum (Two-rowed barley).	TrEMBL
13439_Transcript_1/1_Confidence_1.000_Length_323_45	323	At2g15650	1347	36.89	103	65	0	9	317	1005	1107	1e-17	86.7	[R] KOG0017 FOG: Transposon-encoded proteins with TYA, reverse transcriptase, integrase domains in various combinations		KOG
13457_Transcript_1/1_Confidence_1.000_Length_621_45	621	Y3804_ARATH	1016	57.56	205	87	0	5	619	415	619	9e-58	219	Full=Probably inactive leucine-rich repeat receptor-like protein kinase At3g28040;	Arabidopsis thaliana (Mouse-ear cress).	Swiss-Prot
1345_Transcript_2/6_Confidence_0.600_Length_2361_45	2361	BLH6_ARATH	532	48.72	312	118	8	1313	2233	66	340	2e-59	221	Full=BEL1-like homeodomain protein 6;	Arabidopsis thaliana (Mouse-ear cress).	Swiss-Prot
13466_Transcript_2/3_Confidence_0.667_Length_1163_45	1163	At1g48650	1167	67.1	386	126	1	9	1163	210	595	4e-152	536	[A] KOG0920 ATP-dependent RNA helicase A		KOG
13470_Transcript_1/1_Confidence_1.000_Length_481_45	481	F2DE53_HORVD	395	62.07	116	44	0	1	348	279	394	4e-38	157		Hordeum vulgare var. distichum (Two-rowed barley).	TrEMBL
13476_Transcript_3/4_Confidence_0.556_Length_1057_45	1057	At3g57000	298	65.35	228	77	2	209	886	70	297	5e-80	296	[J] KOG3073 Protein required for 18S rRNA maturation and 40S ribosome biogenesis		KOG
13498_Transcript_1/1_Confidence_1.000_Length_377_45	377	LOC_OS02G52830_PlantCyc_LOC_OS02G52830.1-MONOMER	482	54.55	88	40	0	272	9	20	107	2e-24	105	0	0	PlantCyc
1349_Transcript_1/2_Confidence_1.000_Length_3233_45	3233	At2g17510	955	72.94	957	234	2	273	3074	1	955	0	1365	[J] KOG2102 Exosomal 3'-5' exoribonuclease complex, subunit Rrp44/Dis3		KOG
13510_Transcript_1/1_Confidence_1.000_Length_969_45	969	ARFI_ARATH	638	52.25	178	72	5	738	211	446	612	8e-45	177	Full=Auxin response factor 9;	Arabidopsis thaliana (Mouse-ear cress).	Swiss-Prot
13518_Transcript_2/4_Confidence_0.600_Length_401_45	401	At5g36940	632	77.63	76	17	0	2	229	331	406	6e-28	120	[E] KOG1286 Amino acid transporters		KOG
13526_Transcript_3/3_Confidence_0.667_Length_1024_45	1024	At1g58140	1320	67.03	185	60	1	410	964	825	1008	8e-69	259	[R] KOG0017 FOG: Transposon-encoded proteins with TYA, reverse transcriptase, integrase domains in various combinations		KOG
13527_Transcript_1/1_Confidence_1.000_Length_756_45	756	SCP51_ARATH	461	80	35	7	0	557	661	77	111	5e-20	60.1	Full=Serine carboxypeptidase-like 51;	Arabidopsis thaliana (Mouse-ear cress).	Swiss-Prot
13562_Transcript_1/2_Confidence_1.000_Length_1578_45	1578	ACLA3_ARATH	424	88.44	320	37	0	1578	619	3	322	0	558	Full=ATP-citrate synthase alpha chain protein 3;	Arabidopsis thaliana (Mouse-ear cress).	Swiss-Prot
13568_Transcript_1/1_Confidence_1.000_Length_283_45	283	Q3L634_ZINOF	169	87.5	32	4	0	282	187	138	169	9e-09	60.1		Zingiber officinale (Ginger) (Amomum zingiber).	TrEMBL
13569_Transcript_1/1_Confidence_1.000_Length_373_45	373	RTNLA_ARATH	275	60.48	124	49	0	372	1	78	201	2e-33	137	Full=Reticulon-like protein B1;	Arabidopsis thaliana (Mouse-ear cress).	Swiss-Prot
13572_Transcript_3/3_Confidence_0.667_Length_1205_45	1205	Q0J512_ORYSJ	149	69.7	99	30	0	3	299	50	148	6e-33	143		Oryza sativa subsp. japonica (Rice).	TrEMBL
13596_Transcript_1/2_Confidence_1.000_Length_643_45	643	At5g07140	576	58.1	105	44	0	267	581	127	231	1e-38	135	[T] KOG0192 Tyrosine kinase specific for activated (GTP-bound) p21cdc42Hs		KOG
13605_Transcript_1/1_Confidence_1.000_Length_234_45	234	LOC_OS07G46310_PlantCyc_LOC_OS07G46310.1-MONOMER	760	81.82	77	14	0	232	2	305	381	5e-32	130	0	0	PlantCyc
13617_Transcript_1/1_Confidence_1.000_Length_535_45	535	Q5ZAW2_ORYSJ	143	63.41	41	14	1	530	408	102	141	6e-08	58.2		Oryza sativa subsp. japonica (Rice).	TrEMBL
13635_Transcript_1/1_Confidence_1.000_Length_425_45	425	F6HE86_VITVI	578	73.91	138	36	0	424	11	441	578	2e-57	221		Vitis vinifera (Grape).	TrEMBL
13652_Transcript_2/3_Confidence_0.625_Length_799_45	799	SGN-U577270_PlantCyc_SGN-U314700-MONOMER	143	96.59	88	3	0	1	264	48	135	3e-34	139	ribulose bisphosphate carboxylase/oxygenase	Solanum lycopersicum	PlantCyc
13664_Transcript_5/7_Confidence_0.636_Length_1539_45	1539	DHX8_ARATH	1168	93.6	328	21	0	554	1537	710	1037	0	614	Full=Probable pre-mRNA-splicing factor ATP-dependent RNA helicase;	Arabidopsis thaliana (Mouse-ear cress).	Swiss-Prot
13668_Transcript_1/1_Confidence_1.000_Length_357_45	357	Q9SWA6_ARATH	432	47.27	55	29	0	10	174	378	432	9e-06	50.1		Arabidopsis thaliana (Mouse-ear cress).	TrEMBL
13678_Transcript_1/2_Confidence_1.000_Length_900_45	900	BH036_ARATH	174	27.12	177	108	5	769	275	3	170	5e-09	58.5	Full=Transcription factor bHLH36;	Arabidopsis thaliana (Mouse-ear cress).	Swiss-Prot
13696_Transcript_2/3_Confidence_0.778_Length_757_45	757	At5g16650	128	68.37	98	30	1	572	282	7	104	2e-31	134	[O] KOG0714 Molecular chaperone (DnaJ superfamily)		KOG
136_Transcript_1/1_Confidence_1.000_Length_922_45	922	Y4443_ARATH	350	19.46	185	127	4	566	60	83	261	7e-06	48.1	Full=Probable transposase-like protein At4g04430;	Arabidopsis thaliana (Mouse-ear cress).	Swiss-Prot
13701_Transcript_2/6_Confidence_0.643_Length_3053_45	3053	WAP_ARATH	825	27.85	876	521	20	2853	391	1	820	9e-78	288	Full=WPP domain-associated protein;	Arabidopsis thaliana (Mouse-ear cress).	Swiss-Prot
13703_Transcript_1/1_Confidence_1.000_Length_596_45	596	PP182_ARATH	583	58.08	198	80	3	596	12	261	458	7e-62	233	Full=Pentatricopeptide repeat-containing protein At2g33760;	Arabidopsis thaliana (Mouse-ear cress).	Swiss-Prot
13704_Transcript_1/1_Confidence_1.000_Length_681_45	681	Y4294_ARATH	1037	56.83	227	94	3	1	681	162	384	3e-62	234	Full=Probable LRR receptor-like serine/threonine-protein kinase At4g20940;	Arabidopsis thaliana (Mouse-ear cress).	Swiss-Prot
1370_Transcript_5/7_Confidence_0.095_Length_455_45	455	F6HKB5_VITVI	563	46.84	79	33	4	444	220	13	86	1e-07	56.6		Vitis vinifera (Grape).	TrEMBL
13722_Transcript_2/2_Confidence_1.000_Length_560_45	560	BH144_ARATH	251	60.38	53	21	0	148	306	199	251	6e-12	67	Full=Transcription factor bHLH144;	Arabidopsis thaliana (Mouse-ear cress).	Swiss-Prot
13723_Transcript_1/2_Confidence_1.000_Length_1536_45	1536	SPIN1_ORYSJ	281	65.84	281	92	4	1044	211	1	280	2e-98	356	Full=KH domain-containing protein SPIN1;	Oryza sativa subsp. japonica (Rice).	Swiss-Prot
13724_Transcript_3/3_Confidence_0.667_Length_1206_45	1206	EXB17_ORYSJ	278	68.49	73	22	1	70	288	203	274	9e-20	94.7	Full=Expansin-B17;	Oryza sativa subsp. japonica (Rice).	Swiss-Prot
13736_Transcript_1/1_Confidence_1.000_Length_1101_45	1101	GDL53_ARATH	380	57.23	325	138	1	1	972	56	380	1e-116	416	Full=GDSL esterase/lipase At3g26430;	Arabidopsis thaliana (Mouse-ear cress).	Swiss-Prot
13746_Transcript_1/2_Confidence_1.000_Length_1091_45	1091	LOC_OS03G52000_PlantCyc_LOC_OS03G52000.1-MONOMER	513	47.81	251	109	7	1060	344	273	513	2e-38	154	0	0	PlantCyc
13747_Transcript_1/1_Confidence_1.000_Length_551_45	551	At1g55860	3891	40.51	79	45	1	2	232	17	95	2e-11	67.4	[OK] KOG0939 E3 ubiquitin-protein ligase/Putative upstream regulatory element binding protein		KOG
1374_Transcript_2/3_Confidence_0.667_Length_1295_45	1295	FUT11_ARATH	501	60.96	228	88	1	611	1294	267	493	1e-76	283	Full=Glycoprotein 3-alpha-L-fucosyltransferase A;	Arabidopsis thaliana (Mouse-ear cress).	Swiss-Prot
13763_Transcript_2/3_Confidence_0.667_Length_1222_45	1222	Q66V57_ORYSI	259	31.36	220	130	7	243	851	3	218	2e-15	85.1		Oryza sativa subsp. indica (Rice).	TrEMBL
13769_Transcript_1/1_Confidence_1.000_Length_533_45	533	H2A6_ARATH	130	97.87	94	2	0	2	283	26	119	5e-35	143	Full=Histone H2A.6;	Arabidopsis thaliana (Mouse-ear cress).	Swiss-Prot
13771_Transcript_1/2_Confidence_1.000_Length_382_45	382	Q402F0_SOLLC	288	79.63	54	11	0	220	381	112	165	3e-35	96.7		Solanum lycopersicum (Tomato) (Lycopersicon esculentum).	TrEMBL
13772_Transcript_1/1_Confidence_1.000_Length_447_45	447	A5BCA5_VITVI	1060	42	50	28	1	170	24	966	1015	4e-08	41.6		Vitis vinifera (Grape).	TrEMBL
13774_Transcript_1/1_Confidence_1.000_Length_261_45	261	LOC_OS04G54800_PlantCyc_LOC_OS04G54800.1-MONOMER	287	53.57	84	38	1	9	260	31	113	6e-19	86.7	0	0	PlantCyc
13786_Transcript_1/1_Confidence_1.000_Length_1456_45	1456	SPL16_ORYSJ	455	43.72	462	182	15	1274	102	1	455	1e-78	290	Full=Squamosa promoter-binding-like protein 16;	Oryza sativa subsp. japonica (Rice).	Swiss-Prot
13789_Transcript_1/1_Confidence_1.000_Length_208_45	208	Q94EF5_ORYSJ	849	66.67	69	22	1	3	206	408	476	2e-18	92		Oryza sativa subsp. japonica (Rice).	TrEMBL
13802_Transcript_1/1_Confidence_1.000_Length_325_45	325	PGLR_VITVI	491	80	100	20	0	3	302	155	254	7e-44	171	Full=Probable polygalacturonase;	Vitis vinifera (Grape).	Swiss-Prot
13807_Transcript_1/1_Confidence_1.000_Length_462_45	462	UP12_ORYSJ	283	77.48	151	34	0	454	2	52	202	3e-64	240	Full=Unknown protein DS12 from 2D-PAGE of leaf, chloroplastic;	Oryza sativa subsp. japonica (Rice).	Swiss-Prot
13813_Transcript_1/1_Confidence_1.000_Length_211_45	211	D7U621_VITVI	349	56.36	55	23	1	6	167	293	347	4e-10	64.7		Vitis vinifera (Grape).	TrEMBL
13825_Transcript_1/1_Confidence_1.000_Length_391_45	391	ALDO1_ORYSJ	1358	68.99	129	40	0	3	389	735	863	2e-51	196	Full=Probable aldehyde oxidase 1;	Oryza sativa subsp. japonica (Rice).	Swiss-Prot
13827_Transcript_3/3_Confidence_0.667_Length_1637_45	1637	B9N3G2_POPTR	591	54.01	337	141	4	543	1526	44	375	4e-98	360		Populus trichocarpa (Western balsam poplar) (Populus balsamifera subsp. trichocarpa).	TrEMBL
13829_Transcript_1/2_Confidence_1.000_Length_2241_45	2241	PMT2_ARATH	616	76.57	606	140	2	2072	261	9	614	0	971	Full=Probable methyltransferase PMT2;	Arabidopsis thaliana (Mouse-ear cress).	Swiss-Prot
1382_Transcript_3/6_Confidence_0.667_Length_2587_45	2587	At5g15270	568	34.96	123	42	3	2586	2326	411	531	2e-10	67	[AR] KOG2190 PolyC-binding proteins alphaCP-1 and related KH domain proteins		KOG
13832_Transcript_1/1_Confidence_1.000_Length_917_45	917	F6H1K9_VITVI	761	40	85	40	3	46	267	536	620	2e-06	54.7		Vitis vinifera (Grape).	TrEMBL
13837_Transcript_1/1_Confidence_1.000_Length_1936_45	1936	F6HYH6_VITVI	859	72.22	180	45	1	1931	1407	251	430	7e-39	163		Vitis vinifera (Grape).	TrEMBL
13866_Transcript_1/2_Confidence_1.000_Length_577_45	577	LOC_OS02G47800_PlantCyc_LOC_OS02G47800.1-MONOMER	476	54.48	134	52	2	59	433	338	471	6e-32	131	0	0	PlantCyc
1386_Transcript_1/3_Confidence_0.667_Length_1414_45	1414	At4g24880	274	68.72	195	50	1	1250	699	80	274	6e-80	296	[A] KOG3132 m3G-cap-specific nuclear import receptor (Snurportin1)		KOG
13886_Transcript_1/1_Confidence_1.000_Length_563_45	563	D7TF15_VITVI	580	56.82	132	57	0	168	563	269	400	6e-27	121		Vitis vinifera (Grape).	TrEMBL
13940_Transcript_1/2_Confidence_1.000_Length_1362_45	1362	GLAK1_ARATH	362	70.95	358	104	0	29	1102	5	362	9e-152	533	Full=Glucuronokinase 1;	Arabidopsis thaliana (Mouse-ear cress).	Swiss-Prot
13963_Transcript_2/2_Confidence_1.000_Length_2915_45	2915	Q0JDJ8_ORYSJ	816	47.56	553	280	5	1	1653	271	815	2e-140	501		Oryza sativa subsp. japonica (Rice).	TrEMBL
13972_Transcript_3/3_Confidence_0.600_Length_598_45	598	Y8359_ORYSJ	213	57.85	121	49	1	536	180	4	124	2e-37	152	Full=Uncharacterized protein Os08g0359500;	Oryza sativa subsp. japonica (Rice).	Swiss-Prot
13987_Transcript_1/1_Confidence_1.000_Length_250_45	250	At3g57120	434	52.38	42	20	0	248	123	393	434	9e-06	47	[T] KOG1187 Serine/threonine protein kinase		KOG
13992_Transcript_1/1_Confidence_1.000_Length_1054_45	1054	SUT34_ARATH	653	68.89	315	96	1	1	939	336	650	9e-122	433	Full=Probable sulfate transporter 3.4;	Arabidopsis thaliana (Mouse-ear cress).	Swiss-Prot
13993_Transcript_1/1_Confidence_1.000_Length_1370_45	1370	A2X7H9_ORYSI	290	41.67	276	148	5	100	918	10	275	4e-49	197		Oryza sativa subsp. indica (Rice).	TrEMBL
1399_Transcript_3/3_Confidence_0.800_Length_1830_45	1830	Y3720_ARATH	476	33.82	207	123	7	1089	1694	262	459	2e-20	97.8	Full=UPF0481 protein At3g47200;	Arabidopsis thaliana (Mouse-ear cress).	Swiss-Prot
14011_Transcript_1/1_Confidence_1.000_Length_345_45	345	D7SP16_VITVI	211	50.94	106	38	3	344	45	26	123	8e-13	73.6		Vitis vinifera (Grape).	TrEMBL
14015_Transcript_1/2_Confidence_1.000_Length_926_45	926	Q84YJ6_ORYSJ	660	40.62	96	46	4	878	606	433	522	6e-07	56.2		Oryza sativa subsp. japonica (Rice).	TrEMBL
14028_Transcript_1/1_Confidence_1.000_Length_338_45	338	Q6AV01_ORYSJ	390	41.28	109	51	3	328	32	261	366	1e-11	69.3		Oryza sativa subsp. japonica (Rice).	TrEMBL
14030_Transcript_1/1_Confidence_1.000_Length_287_45	287	At2g44730	372	62.5	48	17	1	27	170	111	157	4e-10	61.6	[K] KOG4282 Transcription factor GT-2 and related proteins, contains trihelix DNA-binding/SANT domain		KOG
14033_Transcript_1/1_Confidence_1.000_Length_337_45	337	C5YBQ3_SORBI	535	76.67	30	7	0	8	97	505	534	1e-06	52.8		Sorghum bicolor (Sorghum) (Sorghum vulgare).	TrEMBL
14044_Transcript_1/1_Confidence_1.000_Length_206_45	206	ABI5_ARATH	442	84.48	58	8	1	204	31	342	398	1e-19	91.3	Full=Protein ABSCISIC ACID-INSENSITIVE 5;	Arabidopsis thaliana (Mouse-ear cress).	Swiss-Prot
14073_Transcript_2/3_Confidence_0.750_Length_1196_45	1196	RRFC_DAUCA	227	70.43	230	65	1	998	309	1	227	1e-81	300	Full=Ribosome-recycling factor, chloroplastic;	Daucus carota (Carrot).	Swiss-Prot
14075_Transcript_1/2_Confidence_1.000_Length_581_45	581	LOC_OS03G02939_PlantCyc_LOC_OS03G02939.1-MONOMER	322	56.2	137	55	2	543	133	2	133	3e-40	155	0	0	PlantCyc
14083_Transcript_1/1_Confidence_1.000_Length_873_45	873	Y3804_ARATH	1016	54.11	292	133	1	1	873	294	585	2e-78	288	Full=Probably inactive leucine-rich repeat receptor-like protein kinase At3g28040;	Arabidopsis thaliana (Mouse-ear cress).	Swiss-Prot
14091_Transcript_1/1_Confidence_1.000_Length_1303_45	1303	At3g22290	290	77.46	284	59	2	215	1060	1	281	6e-123	439	[U] KOG2667 COPII vesicle protein		KOG
14105_Transcript_6/12_Confidence_0.282_Length_1493_45	1493	At1g44910	946	37.5	200	116	4	722	1300	739	936	3e-10	65.5	[A] KOG0152 Spliceosomal protein FBP11/Splicing factor PRP40		KOG
14105_Transcript_7/12_Confidence_0.385_Length_1758_45	1758	At1g44910	946	44.92	305	150	5	672	1565	643	936	3e-32	139	[A] KOG0152 Spliceosomal protein FBP11/Splicing factor PRP40		KOG
14111_Transcript_2/3_Confidence_0.667_Length_3958_45	3958	PMA1_NICPL	957	91.83	649	53	0	88	2034	4	652	0	1051	Full=Plasma membrane ATPase 1;	Nicotiana plumbaginifolia (Leadwort-leaved tobacco) (Tex-Mex tobacco).	Swiss-Prot
14119_Transcript_1/1_Confidence_1.000_Length_791_45	791	At2g20510	533	47.92	96	48	2	220	504	1	95	8e-18	89.4	[U] KOG2580 Mitochondrial import inner membrane translocase, subunit TIM44		KOG
14134_Transcript_1/2_Confidence_1.000_Length_428_45	428	B9RE35_RICCO	297	64	50	15	2	416	276	226	275	2e-09	62		Ricinus communis (Castor bean).	TrEMBL
14139_Transcript_1/1_Confidence_1.000_Length_698_45	698	3MAT_DAHPI	460	36.96	184	108	4	14	547	274	455	1e-28	123	Full=Malonyl-coenzyme A:anthocyanin 3-O-glucoside-6''-O-malonyltransferase;	Dahlia pinnata (Pinnate dahlia) (Dahlia variabilis).	Swiss-Prot
14146_Transcript_5/7_Confidence_0.625_Length_1321_45	1321	At3g61620	241	78.42	241	49	3	338	1057	1	239	3e-98	357	[J] KOG1068 Exosomal 3'-5' exoribonuclease complex, subunit Rrp41 and related exoribonucleases		KOG
14151_Transcript_2/3_Confidence_0.429_Length_1162_45	1162	G7KLT0_MEDTR	450	79.59	49	10	0	625	771	104	152	2e-14	81.6		Medicago truncatula (Barrel medic) (Medicago tribuloides).	TrEMBL
1417_Transcript_5/8_Confidence_0.593_Length_1941_45	1941	TOE2_ARATH	485	32.88	219	96	6	901	260	34	206	2e-12	70.9	Full=AP2-like ethylene-responsive transcription factor TOE2;	Arabidopsis thaliana (Mouse-ear cress).	Swiss-Prot
14195_Transcript_3/3_Confidence_0.667_Length_1188_45	1188	CALR3_ARATH	424	79.69	64	13	0	185	376	74	137	2e-24	110	Full=Calreticulin-3;	Arabidopsis thaliana (Mouse-ear cress).	Swiss-Prot
1419_Transcript_2/3_Confidence_0.667_Length_1216_45	1216	F6H7L9_VITVI	190	40.36	166	62	4	518	919	29	189	2e-16	88.2		Vitis vinifera (Grape).	TrEMBL
141_Transcript_1/2_Confidence_1.000_Length_5991_45	5991	RPB1_ARATH	1839	86.99	1537	199	1	5815	1205	1	1536	0	2701	Full=DNA-directed RNA polymerase II subunit RPB1;	Arabidopsis thaliana (Mouse-ear cress).	Swiss-Prot
14213_Transcript_2/2_Confidence_1.000_Length_573_45	573	At1g53030	72	61.76	68	26	0	301	98	5	72	7e-21	98.6	[O] KOG3496 Cytochrome c oxidase assembly protein/Cu2+ chaperone COX17		KOG
14214_Transcript_1/1_Confidence_1.000_Length_333_45	333	CIPK6_ORYSJ	451	59.09	44	17	1	333	205	408	451	2e-09	57.4	Full=CBL-interacting protein kinase 6;	Oryza sativa subsp. japonica (Rice).	Swiss-Prot
14226_Transcript_7/8_Confidence_0.650_Length_2898_45	2898	ARAE2_ARATH	417	89.47	76	8	0	519	746	62	137	2e-33	141	Full=Putative UDP-arabinose 4-epimerase 2;	Arabidopsis thaliana (Mouse-ear cress).	Swiss-Prot
14237_Transcript_1/1_Confidence_1.000_Length_578_45	578	LOC_OS06G18790_PlantCyc_LOC_OS06G18790.1-MONOMER	323	50	170	78	4	54	545	1	169	2e-39	156	0	0	PlantCyc
1423_Transcript_1/6_Confidence_0.647_Length_1472_45	1472	TI10B_ARATH	249	30.77	182	68	5	178	687	15	150	7e-11	65.5	Full=Protein TIFY 10B;	Arabidopsis thaliana (Mouse-ear cress).	Swiss-Prot
1423_Transcript_2/6_Confidence_0.706_Length_1459_45	1459	TI10B_ARATH	249	38.62	145	68	5	178	576	15	150	2e-15	80.9	Full=Protein TIFY 10B;	Arabidopsis thaliana (Mouse-ear cress).	Swiss-Prot
14240_Transcript_1/1_Confidence_1.000_Length_408_45	408	At5g41800	423	69.57	92	28	0	406	131	332	423	1e-32	136	[E] KOG1303 Amino acid transporters		KOG
14245_Transcript_1/1_Confidence_1.000_Length_859_45	859	B8B820_ORYSI	136	56.88	160	42	1	79	558	4	136	1e-44	181		Oryza sativa subsp. indica (Rice).	TrEMBL
1425_Transcript_2/3_Confidence_0.667_Length_2649_45	2649	At1g71410	909	60.4	692	245	13	2649	637	157	840	0	766	[T] KOG2137 Protein kinase		KOG
14266_Transcript_1/2_Confidence_1.000_Length_456_45	456	At1g02080	2226	61.67	60	22	1	456	280	2167	2226	2e-14	76.3	[K] KOG1831 Negative regulator of transcription		KOG
14276_Transcript_1/1_Confidence_1.000_Length_335_45	335	Y2913_ARATH	828	55.56	72	31	1	289	74	31	101	1e-19	90.9	Full=G-type lectin S-receptor-like serine/threonine-protein kinase At2g19130;	Arabidopsis thaliana (Mouse-ear cress).	Swiss-Prot
14288_Transcript_5/6_Confidence_0.667_Length_2508_45	2508	SGN-U582712_PlantCyc_SGN-U317421-MONOMER	361	60.65	338	130	2	60	1067	6	342	9e-126	446	TRIACYLGLYCEROL LIPASE	Solanum lycopersicum	PlantCyc
14292_Transcript_1/1_Confidence_1.000_Length_476_45	476	At3g58630	311	44.78	67	37	0	402	202	243	309	1e-10	63.9	[K] KOG4282 Transcription factor GT-2 and related proteins, contains trihelix DNA-binding/SANT domain		KOG
14296_Transcript_1/1_Confidence_1.000_Length_472_45	472	B9GS06_POPTR	149	96.55	29	1	0	5	91	118	146	4e-08	58.2		Populus trichocarpa (Western balsam poplar) (Populus balsamifera subsp. trichocarpa).	TrEMBL
14303_Transcript_1/2_Confidence_1.000_Length_719_45	719	C3H2_ORYSJ	386	66.23	228	57	7	49	711	1	215	8e-77	283	Full=Zinc finger CCCH domain-containing protein 2;	Oryza sativa subsp. japonica (Rice).	Swiss-Prot
14306_Transcript_1/1_Confidence_1.000_Length_527_45	527	PAP10_ARATH	284	69.39	49	13	1	1	141	234	282	2e-07	51.6	Full=Probable plastid-lipid-associated protein 10, chloroplastic;	Arabidopsis thaliana (Mouse-ear cress).	Swiss-Prot
14319_Transcript_1/2_Confidence_1.000_Length_827_45	827	COP10_ARATH	182	70.51	156	45	1	774	307	28	182	3e-51	198	Full=Constitutive photomorphogenesis protein 10;	Arabidopsis thaliana (Mouse-ear cress).	Swiss-Prot
1432_Transcript_1/9_Confidence_0.591_Length_2803_45	2803	B9RKC1_RICCO	1155	22.47	930	495	40	2706	154	371	1153	2e-20	103		Ricinus communis (Castor bean).	TrEMBL
14343_Transcript_1/1_Confidence_1.000_Length_381_45	381	PRF1_SOLLC	346	54.55	55	24	1	200	364	168	221	4e-12	66.6	Full=36.4 kDa proline-rich protein;	Solanum lycopersicum (Tomato) (Lycopersicon esculentum).	Swiss-Prot
1434_Transcript_1/3_Confidence_0.667_Length_1064_45	1064	At1g48170	311	59.35	155	61	1	809	345	4	156	8e-46	182	[F] KOG1018 Cytosine deaminase FCY1 and related enzymes		KOG
14356_Transcript_1/1_Confidence_1.000_Length_770_45	770	QSOX1_ARATH	528	62.39	117	36	1	264	590	291	407	1e-44	167	Full=Sulfhydryl oxidase 1;	Arabidopsis thaliana (Mouse-ear cress).	Swiss-Prot
14369_Transcript_3/4_Confidence_0.583_Length_1196_45	1196	gi|32976971|dbj|AK066953.1|	1321	86.82	387	49	2	592	977	569	184	4e-118	431	Oryza sativa Japonica Group cDNA clone:J013092A21, full insert sequence.	Oryza sativa Japonica Group	GenBank-NT
14386_Transcript_1/2_Confidence_1.000_Length_3004_45	3004	HSL1_ARATH	996	54.34	957	410	10	2945	123	16	961	0	964	Full=Receptor-like protein kinase HSL1;	Arabidopsis thaliana (Mouse-ear cress).	Swiss-Prot
14395_Transcript_1/1_Confidence_1.000_Length_525_45	525	Q2QLI7_ORYSJ	927	68.97	29	9	0	439	525	575	603	2e-06	52.8		Oryza sativa subsp. japonica (Rice).	TrEMBL
14397_Transcript_3/3_Confidence_0.600_Length_1760_45	1760	At3g49590	603	41.87	492	253	13	1	1425	118	593	6e-50	197	[U] KOG4573 Phosphoprotein involved in cytoplasm to vacuole targeting and autophagy		KOG
14405_Transcript_1/1_Confidence_1.000_Length_907_45	907	At1g55040	849	67.88	137	41	2	50	460	362	495	7e-53	206	[R] KOG4198 RNA-binding Ran Zn-finger protein and related proteins		KOG
14424_Transcript_1/2_Confidence_1.000_Length_656_45	656	A5ANW4_VITVI	717	55.1	49	21	1	498	641	8	56	5e-06	52.4		Vitis vinifera (Grape).	TrEMBL
14426_Transcript_1/1_Confidence_1.000_Length_561_45	561	PP134_ARATH	397	44.58	83	45	1	3	248	314	396	3e-17	84.7	Full=Pentatricopeptide repeat-containing protein At1g80150, mitochondrial;	Arabidopsis thaliana (Mouse-ear cress).	Swiss-Prot
14431_Transcript_1/1_Confidence_1.000_Length_557_45	557	A2WX05_ORYSI	363	39.52	124	55	5	14	340	70	188	2e-07	56.2		Oryza sativa subsp. indica (Rice).	TrEMBL
14436_Transcript_1/1_Confidence_1.000_Length_894_45	894	SCP35_ARATH	480	60.67	300	109	4	892	2	48	341	8e-102	366	Full=Serine carboxypeptidase-like 35;	Arabidopsis thaliana (Mouse-ear cress).	Swiss-Prot
14446_Transcript_1/1_Confidence_1.000_Length_247_45	247	B9SXP5_RICCO	389	52	75	30	2	230	6	35	103	3e-08	58.5		Ricinus communis (Castor bean).	TrEMBL
14468_Transcript_1/3_Confidence_0.667_Length_731_45	731	F6I612_VITVI	209	37.56	221	115	6	60	698	1	206	3e-30	133		Vitis vinifera (Grape).	TrEMBL
14469_Transcript_2/2_Confidence_1.000_Length_1545_45	1545	At3g54020	305	68.59	312	90	3	1153	218	1	304	4e-119	427	[S] KOG3058 Uncharacterized conserved protein		KOG
14470_Transcript_1/2_Confidence_1.000_Length_1531_45	1531	AP2_ARATH	432	58.44	243	48	3	717	1415	134	333	2e-63	239	Full=Floral homeotic protein APETALA 2;	Arabidopsis thaliana (Mouse-ear cress).	Swiss-Prot
14475_Transcript_1/1_Confidence_1.000_Length_656_45	656	LOC_OS04G46370_PlantCyc_LOC_OS04G46370.1-MONOMER	387	85.19	108	16	0	344	21	280	387	5e-51	195	0	0	PlantCyc
14477_Transcript_1/1_Confidence_1.000_Length_265_45	265	Q69MV8_ORYSJ	124	50	86	32	2	3	227	39	124	4e-13	74.7		Oryza sativa subsp. japonica (Rice).	TrEMBL
14489_Transcript_1/1_Confidence_1.000_Length_533_45	533	C6T0I2_SOYBN	142	57.85	121	49	1	86	448	24	142	6e-23	107		Glycine max (Soybean) (Glycine hispida).	TrEMBL
14500_Transcript_1/1_Confidence_1.000_Length_356_45	356	PP417_ARATH	657	59.32	118	48	0	3	356	402	519	2e-40	160	Full=Pentatricopeptide repeat-containing protein At5g44230;	Arabidopsis thaliana (Mouse-ear cress).	Swiss-Prot
14513_Transcript_1/1_Confidence_1.000_Length_352_45	352	PHYK2_ORYSJ	304	70.45	88	26	0	350	87	217	304	1e-31	131	Full=Probable phytol kinase 2, chloroplastic;	Oryza sativa subsp. japonica (Rice).	Swiss-Prot
1452_Transcript_9/10_Confidence_0.600_Length_5991_45	5991	HsM5453806	562	32.93	246	151	5	980	1711	163	396	1e-25	119	[A] KOG0117 Heterogeneous nuclear ribonucleoprotein R (RRM superfamily)		KOG
14552_Transcript_1/1_Confidence_1.000_Length_640_45	640	PP179_ARATH	572	54.84	93	41	1	12	287	477	569	9e-29	123	Full=Pentatricopeptide repeat-containing protein At2g32230, mitochondrial;	Arabidopsis thaliana (Mouse-ear cress).	Swiss-Prot
1455_Transcript_1/1_Confidence_1.000_Length_472_45	472	Q5ZDT6_ORYSJ	522	28.48	165	64	3	100	432	25	189	3e-09	62		Oryza sativa subsp. japonica (Rice).	TrEMBL
1457_Transcript_2/3_Confidence_0.714_Length_1859_45	1859	At3g48990	514	72.21	403	108	1	44	1252	55	453	2e-174	543	[I] KOG1176 Acyl-CoA synthetase		KOG
14581_Transcript_1/1_Confidence_1.000_Length_339_45	339	CCD41_ORYSJ	356	70.69	116	30	1	2	337	85	200	9e-41	161	Full=Cyclin-D4-1;	Oryza sativa subsp. japonica (Rice).	Swiss-Prot
14592_Transcript_4/5_Confidence_0.600_Length_476_45	476	DPE1_ORYSJ	594	67.57	37	12	0	156	266	404	440	1e-13	55.8	Full=4-alpha-glucanotransferase DPE1, chloroplastic/amyloplastic;	Oryza sativa subsp. japonica (Rice).	Swiss-Prot
14603_Transcript_1/1_Confidence_1.000_Length_1008_45	1008	At5g59980	680	52.31	216	97	4	6	641	95	308	6e-59	226	[J] KOG2363 Protein subunit of nuclear ribonuclease P (RNase P)		KOG
14619_Transcript_1/1_Confidence_1.000_Length_282_45	282	LRK91_ARATH	651	61.7	94	36	0	282	1	313	406	3e-29	123	Full=L-type lectin-domain containing receptor kinase IX.1;	Arabidopsis thaliana (Mouse-ear cress).	Swiss-Prot
14628_Transcript_1/1_Confidence_1.000_Length_987_45	987	At3g06130	473	80.82	73	11	1	735	517	1	70	1e-21	102	[P] KOG1603 Copper chaperone		KOG
14631_Transcript_1/1_Confidence_1.000_Length_296_45	296	LOC_OS06G41090_PlantCyc_LOC_OS06G41090.1-MONOMER	824	53.64	110	35	3	13	294	135	244	2e-25	108	0	0	PlantCyc
14633_Transcript_3/5_Confidence_0.500_Length_1712_45	1712	At2g22360	391	76.5	366	84	2	199	1293	24	388	3e-161	567	[O] KOG0715 Molecular chaperone (DnaJ superfamily)		KOG
14639_Transcript_2/4_Confidence_0.727_Length_2641_45	2641	ARFI_ORYSJ	673	60.41	629	220	6	627	2432	14	640	0	709	Full=Auxin response factor 9;	Oryza sativa subsp. japonica (Rice).	Swiss-Prot
14646_Transcript_1/1_Confidence_1.000_Length_1065_45	1065	At3g01980	266	56.39	266	116	0	63	860	1	266	3e-83	307	[R] KOG0725 Reductases with broad range of substrate specificities		KOG
14648_Transcript_1/2_Confidence_1.000_Length_1923_45	1923	At2g43400	633	74.9	526	132	0	3	1580	108	633	0	848	[C] KOG2415 Electron transfer flavoprotein ubiquinone oxidoreductase		KOG
1464_Transcript_1/3_Confidence_0.667_Length_1148_45	1148	G7IXS4_MEDTR	625	35.26	312	149	9	81	941	1	284	2e-24	114		Medicago truncatula (Barrel medic) (Medicago tribuloides).	TrEMBL
14651_Transcript_2/3_Confidence_0.714_Length_679_45	679	At1g64790	2428	35.77	123	72	1	382	35	2268	2390	3e-12	70.5	[J] KOG1242 Protein containing adaptin N-terminal region		KOG
14651_Transcript_3/3_Confidence_0.714_Length_764_45	764	At1g64790	2428	40	105	56	1	328	35	2286	2390	2e-11	67.8	[J] KOG1242 Protein containing adaptin N-terminal region		KOG
14669_Transcript_1/1_Confidence_1.000_Length_544_45	544	CLCE_ARATH	710	58.16	141	55	1	438	28	68	208	4e-42	167	Full=Chloride channel protein CLC-e;	Arabidopsis thaliana (Mouse-ear cress).	Swiss-Prot
14671_Transcript_1/1_Confidence_1.000_Length_585_45	585	E5GBZ4_CUCME	258	29.75	121	59	3	3	365	28	122	3e-09	62.8		Cucumis melo subsp. melo.	TrEMBL
14679_Transcript_1/1_Confidence_1.000_Length_224_45	224	Q5NBJ1_ORYSJ	932	77.19	57	13	0	1	171	762	818	5e-21	100		Oryza sativa subsp. japonica (Rice).	TrEMBL
14689_Transcript_1/3_Confidence_0.600_Length_502_45	502	At5g49620	307	87.22	133	17	0	103	501	23	155	2e-68	256	[K] KOG0048 Transcription factor, Myb superfamily		KOG
1468_Transcript_6/11_Confidence_0.393_Length_2604_45	2604	ACCA_ARATH	769	48.18	743	284	15	434	2479	20	722	3e-165	579	Full=Acetyl-coenzyme A carboxylase carboxyl transferase subunit alpha, chloroplastic;	Arabidopsis thaliana (Mouse-ear cress).	Swiss-Prot
14700_Transcript_2/2_Confidence_1.000_Length_760_45	760	TKI1_ARATH	743	82.93	41	7	0	273	395	87	127	8e-16	71.6	Full=TSL-kinase interacting protein 1;	Arabidopsis thaliana (Mouse-ear cress).	Swiss-Prot
14706_Transcript_6/7_Confidence_0.316_Length_1380_45	1380	D2HDH_ORYSI	559	70.55	146	43	0	695	1132	414	559	6e-55	211	Full=Probable D-2-hydroxyglutarate dehydrogenase, mitochondrial;	Oryza sativa subsp. indica (Rice).	Swiss-Prot
14707_Transcript_2/3_Confidence_0.600_Length_1135_45	1135	CALS3_ARATH	1955	61.54	117	40	3	2	340	442	557	3e-34	142	Full=Callose synthase 3;	Arabidopsis thaliana (Mouse-ear cress).	Swiss-Prot
14717_Transcript_1/1_Confidence_1.000_Length_386_45	386	F2DFN8_HORVD	699	56.25	64	23	1	203	12	220	278	3e-15	81.6		Hordeum vulgare var. distichum (Two-rowed barley).	TrEMBL
14718_Transcript_1/1_Confidence_1.000_Length_252_45	252	Q9LJA4_ARATH	241	62.79	43	16	0	251	123	129	171	6e-10	63.9		Arabidopsis thaliana (Mouse-ear cress).	TrEMBL
14722_Transcript_1/1_Confidence_1.000_Length_410_45	410	C5YCY8_SORBI	175	75	52	13	0	5	160	109	160	5e-09	60.8		Sorghum bicolor (Sorghum) (Sorghum vulgare).	TrEMBL
14727_Transcript_1/2_Confidence_1.000_Length_1114_45	1114	At1g60690	345	67.99	328	82	1	1114	131	38	342	2e-128	457	[C] KOG1575 Voltage-gated shaker-like K+ channel, subunit beta/KCNAB		KOG
14737_Transcript_3/3_Confidence_0.778_Length_1612_45	1612	CSLC7_ORYSJ	688	63.66	355	74	4	3	923	135	482	5e-119	424	Full=Probable xyloglucan glycosyltransferase 7;	Oryza sativa subsp. japonica (Rice).	Swiss-Prot
14772_Transcript_1/1_Confidence_1.000_Length_492_45	492	PPL1_ARATH	230	74.5	149	38	0	41	487	72	220	2e-56	214	Full=PsbP-like protein 1, chloroplastic;	Arabidopsis thaliana (Mouse-ear cress).	Swiss-Prot
1477_Transcript_1/1_Confidence_1.000_Length_433_45	433	Y4230_ARATH	852	52.24	67	28	3	234	428	26	90	5e-10	60.1	Full=G-type lectin S-receptor-like serine/threonine-protein kinase At4g03230;	Arabidopsis thaliana (Mouse-ear cress).	Swiss-Prot
14781_Transcript_1/1_Confidence_1.000_Length_1133_45	1133	Q9M0M1_PlantCyc_AT4G18180-MONOMER	414	58.69	351	140	2	1065	16	27	373	1e-120	427	polygalacturonase	Arabidopsis thaliana	PlantCyc
14788_Transcript_1/2_Confidence_1.000_Length_867_45	867	At5g11640	253	58.82	85	30	3	468	710	166	249	2e-17	88.6	[O] KOG0914 Thioredoxin-like protein		KOG
14790_Transcript_1/2_Confidence_1.000_Length_5243_45	5243	B9G3I1_ORYSJ	1625	73.44	1638	390	14	4986	166	1	1624	0	2357		Oryza sativa subsp. japonica (Rice).	TrEMBL
14817_Transcript_1/2_Confidence_1.000_Length_849_45	849	TT2_ARATH	258	75.56	90	22	0	843	574	23	112	2e-38	155	Full=Transcription factor TT2;	Arabidopsis thaliana (Mouse-ear cress).	Swiss-Prot
14828_Transcript_1/2_Confidence_1.000_Length_965_45	965	RABF1_ARATH	202	80.71	197	37	1	859	272	1	197	4e-82	301	Full=Ras-related protein RABF1;	Arabidopsis thaliana (Mouse-ear cress).	Swiss-Prot
14836_Transcript_1/3_Confidence_0.800_Length_1074_45	1074	HOX21_ORYSJ	366	69.34	137	30	3	112	486	83	219	9e-51	180	Full=Homeobox-leucine zipper protein HOX21;	Oryza sativa subsp. japonica (Rice).	Swiss-Prot
14836_Transcript_2/3_Confidence_0.800_Length_1715_45	1715	HOX21_ORYSJ	366	54.74	274	77	8	835	1521	90	361	8e-54	208	Full=Homeobox-leucine zipper protein HOX21;	Oryza sativa subsp. japonica (Rice).	Swiss-Prot
14838_Transcript_1/1_Confidence_1.000_Length_645_45	645	PP152_ARATH	627	55.14	185	83	0	641	87	442	626	2e-56	214	Full=Pentatricopeptide repeat-containing protein At2g15630, mitochondrial;	Arabidopsis thaliana (Mouse-ear cress).	Swiss-Prot
1483_Transcript_4/8_Confidence_0.500_Length_1509_45	1509	KSG9_ARATH	407	88.71	372	40	1	17	1126	27	398	0	689	Full=Shaggy-related protein kinase iota;	Arabidopsis thaliana (Mouse-ear cress).	Swiss-Prot
14842_Transcript_1/1_Confidence_1.000_Length_1436_45	1436	ALDO1_ORYSJ	1358	41.54	479	241	5	1431	1	299	740	2e-123	439	Full=Probable aldehyde oxidase 1;	Oryza sativa subsp. japonica (Rice).	Swiss-Prot
14857_Transcript_1/1_Confidence_1.000_Length_2486_45	2486	LOC_OS06G01400_PlantCyc_LOC_OS06G01400.1-MONOMER	1068	69	829	256	1	1	2484	181	1009	0	1137	0	0	PlantCyc
14860_Transcript_1/2_Confidence_1.000_Length_1041_45	1041	Q6H6A5_ORYSJ	295	29.22	308	173	7	1024	197	1	295	1e-21	105		Oryza sativa subsp. japonica (Rice).	TrEMBL
1486_Transcript_1/1_Confidence_1.000_Length_466_45	466	ERF92_ARATH	218	52.73	110	47	2	1	330	109	213	1e-13	72	Full=Ethylene-responsive transcription factor 1B;	Arabidopsis thaliana (Mouse-ear cress).	Swiss-Prot
14870_Transcript_1/1_Confidence_1.000_Length_1540_45	1540	F2EB42_HORVD	409	53.46	318	137	3	218	1156	98	409	2e-80	301		Hordeum vulgare var. distichum (Two-rowed barley).	TrEMBL
14882_Transcript_1/1_Confidence_1.000_Length_1400_45	1400	PEX10_ARATH	381	64.61	356	116	5	2	1069	36	381	2e-118	422	Full=Peroxisome biogenesis factor 10;	Arabidopsis thaliana (Mouse-ear cress).	Swiss-Prot
14894_Transcript_1/1_Confidence_1.000_Length_205_45	205	Q5JKW3_ORYSJ	396	77.78	36	8	0	203	96	191	226	9e-09	60.1		Oryza sativa subsp. japonica (Rice).	TrEMBL
14902_Transcript_1/2_Confidence_1.000_Length_563_45	563	IQD31_ARATH	587	55.74	61	27	0	13	195	108	168	1e-06	49.3	Full=Protein IQ-DOMAIN 31;	Arabidopsis thaliana (Mouse-ear cress).	Swiss-Prot
14906_Transcript_1/1_Confidence_1.000_Length_2393_45	2393	LHY_ARATH	645	36.45	705	340	27	276	2246	1	645	4e-58	223	Full=Protein LHY;	Arabidopsis thaliana (Mouse-ear cress).	Swiss-Prot
14917_Transcript_2/3_Confidence_0.400_Length_1245_45	1245	Q6YXY6_ORYSJ	323	48.78	205	101	4	829	224	119	322	1e-36	155		Oryza sativa subsp. japonica (Rice).	TrEMBL
14929_Transcript_1/1_Confidence_1.000_Length_346_45	346	At2g38740	219	69.49	59	18	0	3	179	158	216	2e-17	85.9	[R] KOG2914 Predicted haloacid-halidohydrolase and related hydrolases		KOG
1492_Transcript_2/6_Confidence_0.647_Length_2140_45	2140	GOGC5_ARATH	956	30.77	156	96	4	209	661	331	479	5e-09	60.1	Full=Golgin candidate 5;	Arabidopsis thaliana (Mouse-ear cress).	Swiss-Prot
14941_Transcript_1/1_Confidence_1.000_Length_374_45	374	At3g21420	364	62.61	115	43	0	29	373	54	168	1e-38	155	[QR] KOG0143 Iron/ascorbate family oxidoreductases		KOG
14971_Transcript_1/1_Confidence_1.000_Length_329_45	329	OCT3_ARATH	518	46.67	105	47	4	18	329	1	97	2e-13	70.9	Full=Organic cation/carnitine transporter 3;	Arabidopsis thaliana (Mouse-ear cress).	Swiss-Prot
14972_Transcript_1/1_Confidence_1.000_Length_468_45	468	PTR53_ARATH	616	59	100	41	0	2	301	498	597	3e-30	127	Full=Probable peptide/nitrate transporter At5g62680;	Arabidopsis thaliana (Mouse-ear cress).	Swiss-Prot
14978_Transcript_1/1_Confidence_1.000_Length_633_45	633	At3g20015	386	77.78	72	16	0	3	218	315	386	1e-28	124	[O] KOG1339 Aspartyl protease		KOG
14984_Transcript_1/1_Confidence_1.000_Length_444_45	444	GSO1_ARATH	1249	55.1	147	65	1	2	442	667	812	1e-36	148	Full=LRR receptor-like serine/threonine-protein kinase GSO1;	Arabidopsis thaliana (Mouse-ear cress).	Swiss-Prot
14986_Transcript_1/1_Confidence_1.000_Length_339_45	339	A5C6R1_VITVI	958	66.67	33	11	0	240	338	7	39	1e-08	59.3		Vitis vinifera (Grape).	TrEMBL
1498_Transcript_3/3_Confidence_0.600_Length_1733_45	1733	At1g19630	411	50.91	383	168	6	154	1263	36	411	4e-101	367	[QI] KOG0157 Cytochrome P450 CYP4/CYP19/CYP26 subfamilies		KOG
14990_Transcript_1/1_Confidence_1.000_Length_213_45	213	At2g45330	257	71.43	35	10	0	212	108	223	257	5e-09	57.8	[J] KOG2278 RNA:NAD 2'-phosphotransferase TPT1		KOG
14999_Transcript_1/1_Confidence_1.000_Length_721_45	721	SINA5_ARATH	309	59.06	127	52	0	335	715	29	155	3e-44	175	Full=E3 ubiquitin-protein ligase SINAT5;	Arabidopsis thaliana (Mouse-ear cress).	Swiss-Prot
1499_Transcript_1/4_Confidence_0.762_Length_1095_45	1095	At2g07010	1413	40.58	276	150	4	1092	280	546	812	1e-56	218	[R] KOG0017 FOG: Transposon-encoded proteins with TYA, reverse transcriptase, integrase domains in various combinations		KOG
14_Transcript_11/20_Confidence_0.089_Length_873_45	873	LEC_GALNI	157	43.24	111	58	3	10	342	20	125	2e-19	92.8	Full=Mannose-specific lectin;	Galanthus nivalis (Common snowdrop).	Swiss-Prot
14_Transcript_12/20_Confidence_0.214_Length_738_45	738	LEC_GALNI	157	41.98	131	66	4	21	401	1	125	4e-22	101	Full=Mannose-specific lectin;	Galanthus nivalis (Common snowdrop).	Swiss-Prot
14_Transcript_18/20_Confidence_0.179_Length_1409_45	1409	LEC_GALNI	157	60.53	38	15	0	836	949	25	62	4e-07	51.2	Full=Mannose-specific lectin;	Galanthus nivalis (Common snowdrop).	Swiss-Prot
14_Transcript_20/20_Confidence_0.268_Length_744_45	744	LEC_GALNI	157	48.48	66	34	0	323	520	22	87	2e-13	72.8	Full=Mannose-specific lectin;	Galanthus nivalis (Common snowdrop).	Swiss-Prot
14_Transcript_7/20_Confidence_1.000_Length_814_45	814	SCP50_ARATH	444	67.74	31	10	0	425	333	107	137	1e-13	52	Full=Serine carboxypeptidase-like 50;	Arabidopsis thaliana (Mouse-ear cress).	Swiss-Prot
15016_Transcript_1/1_Confidence_1.000_Length_304_45	304	LOC_OS03G02939_PlantCyc_LOC_OS03G02939.1-MONOMER	322	56.52	46	20	0	302	165	277	322	6e-09	53.5	0	0	PlantCyc
15024_Transcript_1/1_Confidence_1.000_Length_425_45	425	DIR1_ARATH	102	45.33	75	40	1	9	233	29	102	1e-14	75.5	Full=Putative lipid-transfer protein DIR1;	Arabidopsis thaliana (Mouse-ear cress).	Swiss-Prot
15037_Transcript_1/1_Confidence_1.000_Length_450_45	450	TPSBE_ZINZE	554	92	150	12	0	1	450	225	374	5e-60	226	Full=Beta-eudesmol synthase;	Zingiber zerumbet (Shampoo ginger) (Amomum spurium).	Swiss-Prot
15038_Transcript_1/1_Confidence_1.000_Length_249_45	249	TSGD1_ZINOF	550	81.71	82	15	0	2	247	362	443	5e-38	152	Full=(+)-germacrene D synthase;	Zingiber officinale (Ginger) (Amomum zingiber).	Swiss-Prot
15044_Transcript_1/1_Confidence_1.000_Length_1250_45	1250	RNZC_ARATH	354	64.79	355	117	2	1236	181	5	354	6e-125	444	Full=Ribonuclease Z, chloroplastic;	Arabidopsis thaliana (Mouse-ear cress).	Swiss-Prot
15058_Transcript_1/1_Confidence_1.000_Length_481_45	481	At1g69020	798	58.14	129	52	1	382	2	519	647	4e-39	158	[O] KOG2237 Predicted serine protease		KOG
15059_Transcript_1/1_Confidence_1.000_Length_721_45	721	WRK20_ARATH	557	48.95	239	103	6	718	2	178	397	2e-53	205	Full=Probable WRKY transcription factor 20;	Arabidopsis thaliana (Mouse-ear cress).	Swiss-Prot
15077_Transcript_1/1_Confidence_1.000_Length_430_45	430	D7UB90_VITVI	575	73.91	138	36	0	17	430	416	553	1e-52	206		Vitis vinifera (Grape).	TrEMBL
15088_Transcript_2/4_Confidence_0.667_Length_2727_45	2727	B9S538_RICCO	767	38.42	773	440	14	2568	316	7	765	6e-151	536		Ricinus communis (Castor bean).	TrEMBL
15089_Transcript_1/1_Confidence_1.000_Length_615_45	615	YAB5_ARATH	164	76.67	30	7	0	210	299	113	142	2e-10	49.3	Full=Axial regulator YABBY 5;	Arabidopsis thaliana (Mouse-ear cress).	Swiss-Prot
15093_Transcript_1/1_Confidence_1.000_Length_991_45	991	At3g47590	309	60.26	234	91	1	705	4	53	284	1e-80	298	[I] KOG4667 Predicted esterase		KOG
15097_Transcript_3/3_Confidence_0.600_Length_1823_45	1823	B9HUU6_POPTR	559	78.18	440	94	2	1610	294	88	526	0	677		Populus trichocarpa (Western balsam poplar) (Populus balsamifera subsp. trichocarpa).	TrEMBL
1509_Transcript_1/2_Confidence_1.000_Length_1579_45	1579	At5g36230	429	79.65	231	47	0	1416	724	20	250	9e-163	348	[J] KOG2297 Predicted translation factor, contains W2 domain		KOG
15117_Transcript_1/1_Confidence_1.000_Length_247_45	247	Y1407_ORYSJ	317	74.68	79	19	1	9	245	174	251	2e-26	113	Full=Putative AP2/ERF and B3 domain-containing protein Os01g0140700;	Oryza sativa subsp. japonica (Rice).	Swiss-Prot
15144_Transcript_1/1_Confidence_1.000_Length_611_45	611	PUB16_ARATH	674	42.37	59	34	0	357	533	87	145	5e-06	47.8	Full=U-box domain-containing protein 16;	Arabidopsis thaliana (Mouse-ear cress).	Swiss-Prot
15154_Transcript_3/4_Confidence_0.625_Length_1053_45	1053	LOC_OS02G44010_PlantCyc_LOC_OS02G44010.1-MONOMER	327	29.75	121	63	2	170	466	115	235	9e-07	49.3	0	0	PlantCyc
15162_Transcript_1/3_Confidence_0.600_Length_1610_45	1610	LOC_OS06G11500_PlantCyc_LOC_OS06G11500.1-MONOMER	674	82.03	217	39	0	723	1373	434	650	4e-99	356	0	0	PlantCyc
15162_Transcript_2/3_Confidence_0.400_Length_1945_45	1945	LOC_OS06G11500_PlantCyc_LOC_OS06G11500.1-MONOMER	674	77.82	550	122	0	59	1708	101	650	0	827	0	0	PlantCyc
15185_Transcript_1/1_Confidence_1.000_Length_388_45	388	B9HTV1_POPTR	466	81.72	93	17	0	1	279	374	466	5e-44	177		Populus trichocarpa (Western balsam poplar) (Populus balsamifera subsp. trichocarpa).	TrEMBL
151_Transcript_1/2_Confidence_1.000_Length_1890_45	1890	LOX4_ORYSJ	877	59.08	391	149	7	613	1770	75	459	1e-121	433	Full=Probable linoleate 9S-lipoxygenase 4;	Oryza sativa subsp. japonica (Rice).	Swiss-Prot
15213_Transcript_1/1_Confidence_1.000_Length_411_45	411	At5g27540	648	55.14	107	46	1	89	409	17	121	1e-22	103	[V] KOG1707 Predicted Ras related/Rac-GTP binding protein		KOG
15217_Transcript_1/1_Confidence_1.000_Length_359_45	359	At1g45976	325	50	36	18	0	297	190	278	313	1e-08	56.6	[O] KOG1100 Predicted E3 ubiquitin ligase		KOG
15221_Transcript_1/1_Confidence_1.000_Length_490_45	490	E1UHH1_MUSBA	108	49.02	102	36	1	1	258	6	107	5e-20	97.8		Musa balbisiana (Banana).	TrEMBL
15244_Transcript_1/1_Confidence_1.000_Length_721_45	721	Q9LUZ6_PlantCyc_AT5G58600-MONOMER	402	38.77	227	123	6	20	664	179	401	4e-40	159	UDP glycosyltransferase	Arabidopsis thaliana	PlantCyc
15258_Transcript_1/1_Confidence_1.000_Length_655_45	655	ZDH22_ARATH	620	46.15	182	55	5	31	558	465	609	6e-33	137	Full=S-acyltransferase TIP1;	Arabidopsis thaliana (Mouse-ear cress).	Swiss-Prot
15265_Transcript_2/5_Confidence_0.571_Length_2138_45	2138	CDPK_SOYBN	508	80.67	481	88	1	1692	250	18	493	0	780	Full=Calcium-dependent protein kinase SK5;	Glycine max (Soybean) (Glycine hispida).	Swiss-Prot
15269_Transcript_1/1_Confidence_1.000_Length_321_45	321	At1g77720	720	77.11	83	19	0	321	73	561	643	2e-37	152	[D] KOG0596 Dual specificity; serine/threonine and tyrosine kinase		KOG
1526_Transcript_1/1_Confidence_1.000_Length_660_45	660	SRS1_ORYSJ	204	44.88	127	67	2	544	167	1	125	4e-22	101	Full=Salt stress root protein RS1;	Oryza sativa subsp. japonica (Rice).	Swiss-Prot
15270_Transcript_1/3_Confidence_0.667_Length_927_45	927	E0CR94_VITVI	134	46.04	139	65	2	866	459	2	133	1e-14	82		Vitis vinifera (Grape).	TrEMBL
15270_Transcript_3/3_Confidence_0.667_Length_906_45	906	A9PBS5_POPTR	147	46.53	144	64	2	845	435	2	139	9e-16	85.5		Populus trichocarpa (Western balsam poplar) (Populus balsamifera subsp. trichocarpa).	TrEMBL
1528_Transcript_2/4_Confidence_0.700_Length_3779_45	3779	KCBP_ARATH	1260	23.78	164	106	5	3161	2676	727	873	3e-06	51.6	Full=Kinesin-like calmodulin-binding protein;	Arabidopsis thaliana (Mouse-ear cress).	Swiss-Prot
15305_Transcript_2/3_Confidence_0.333_Length_598_45	598	At1g60780	428	85.71	119	17	0	3	359	310	428	2e-55	213	[U] KOG0937 Adaptor complexes medium subunit family		KOG
15325_Transcript_1/1_Confidence_1.000_Length_366_45	366	Y7633_ORYSJ	955	66.67	51	16	1	364	212	532	581	2e-19	68.6	Full=B3 domain-containing protein Os07g0563300;	Oryza sativa subsp. japonica (Rice).	Swiss-Prot
15330_Transcript_1/1_Confidence_1.000_Length_225_45	225	D7KG35_ARALL	390	85.11	47	7	0	225	85	316	362	7e-19	93.6		Arabidopsis lyrata subsp. lyrata (Lyre-leaved rock-cress).	TrEMBL
15332_Transcript_1/6_Confidence_0.333_Length_445_45	445	LOX6_ORYSJ	918	61.54	65	25	0	245	439	126	190	6e-19	89.7	Full=Probable lipoxygenase 6;	Oryza sativa subsp. japonica (Rice).	Swiss-Prot
15333_Transcript_1/1_Confidence_1.000_Length_361_45	361	AGLU_ORYSJ	885	73.11	119	32	0	3	359	302	420	1e-49	191	Full=Probable alpha-glucosidase Os06g0675700;	Oryza sativa subsp. japonica (Rice).	Swiss-Prot
15338_Transcript_1/1_Confidence_1.000_Length_430_45	430	SUBL_ARATH	757	39.39	132	73	3	427	35	236	361	2e-12	68.2	Full=Subtilisin-like protease;	Arabidopsis thaliana (Mouse-ear cress).	Swiss-Prot
15387_Transcript_1/2_Confidence_1.000_Length_616_45	616	D7SZM6_VITVI	362	67.35	49	16	0	333	479	193	241	5e-13	75.5		Vitis vinifera (Grape).	TrEMBL
1538_Transcript_3/7_Confidence_0.412_Length_646_45	646	7303557	4865	38.94	113	59	3	335	3	4379	4483	2e-08	57.4	[R] KOG1808 AAA ATPase containing von Willebrand factor type A (vWA) domain		KOG
153_Transcript_1/1_Confidence_1.000_Length_572_45	572	SUI12_ARATH	113	70.09	107	30	1	151	471	1	105	3e-37	151	Full=Protein translation factor SUI1 homolog 2;	Arabidopsis thaliana (Mouse-ear cress).	Swiss-Prot
15401_Transcript_1/1_Confidence_1.000_Length_322_45	322	Q7XIU5_ORYSJ	1089	58.89	90	35	2	8	274	393	481	2e-21	102		Oryza sativa subsp. japonica (Rice).	TrEMBL
15402_Transcript_1/1_Confidence_1.000_Length_304_45	304	P2C18_ARATH	504	78.22	101	22	0	1	303	235	335	8e-45	174	Full=Probable protein phosphatase 2C 18;	Arabidopsis thaliana (Mouse-ear cress).	Swiss-Prot
15406_Transcript_1/1_Confidence_1.000_Length_270_45	270	Y3078_ARATH	520	50	60	28	2	14	187	1	60	1e-10	61.6	Full=BTB/POZ domain-containing protein At3g50780;	Arabidopsis thaliana (Mouse-ear cress).	Swiss-Prot
15412_Transcript_4/5_Confidence_0.538_Length_1752_45	1752	D7SVM5_VITVI	440	56.96	474	162	7	211	1620	5	440	2e-142	507		Vitis vinifera (Grape).	TrEMBL
15420_Transcript_3/3_Confidence_0.667_Length_460_45	460	C5YW66_SORBI	583	48.21	56	29	0	287	120	132	187	1e-08	59.7		Sorghum bicolor (Sorghum) (Sorghum vulgare).	TrEMBL
15421_Transcript_1/1_Confidence_1.000_Length_216_45	216	PUR_ARATH	296	78.57	28	6	0	216	133	269	296	3e-08	53.1	Full=Transcription factor Pur-alpha 1;	Arabidopsis thaliana (Mouse-ear cress).	Swiss-Prot
15427_Transcript_1/1_Confidence_1.000_Length_217_45	217	SCL6_ARATH	558	49.23	65	33	0	21	215	253	317	2e-14	73.9	Full=Scarecrow-like protein 6;	Arabidopsis thaliana (Mouse-ear cress).	Swiss-Prot
15429_Transcript_1/4_Confidence_0.625_Length_1819_45	1819	Y1342_ARATH	697	44.96	516	267	8	1775	240	159	661	1e-136	483	Full=PHD finger protein At1g33420;	Arabidopsis thaliana (Mouse-ear cress).	Swiss-Prot
15433_Transcript_1/2_Confidence_1.000_Length_805_45	805	TIC22_ARATH	268	69.66	178	50	2	1	534	92	265	3e-68	254	Full=Protein TIC 22, chloroplastic;	Arabidopsis thaliana (Mouse-ear cress).	Swiss-Prot
15441_Transcript_1/1_Confidence_1.000_Length_293_45	293	At3g55220	1214	84.44	45	7	0	155	289	1	45	1e-14	76.3	[L] KOG1897 Damage-specific DNA binding complex, subunit DDB1		KOG
15456_Transcript_2/2_Confidence_1.000_Length_944_45	944	SWET4_ORYSJ	259	74.67	75	19	0	484	708	154	228	1e-25	113	Full=Bidirectional sugar transporter SWEET4;	Oryza sativa subsp. japonica (Rice).	Swiss-Prot
15462_Transcript_1/1_Confidence_1.000_Length_489_45	489	B9RP84_RICCO	927	42.67	75	39	2	258	479	87	158	1e-06	53.1		Ricinus communis (Castor bean).	TrEMBL
15470_Transcript_2/2_Confidence_1.000_Length_506_45	506	GATC_SORBI	146	68.42	95	30	0	146	430	52	146	5e-34	140	Full=Glutamyl-tRNA(Gln) amidotransferase subunit C, chloroplastic/mitochondrial;	Sorghum bicolor (Sorghum) (Sorghum vulgare).	Swiss-Prot
15477_Transcript_1/3_Confidence_0.429_Length_261_45	261	C5YG74_SORBI	2570	59.09	44	18	0	253	122	2517	2560	3e-08	58.2		Sorghum bicolor (Sorghum) (Sorghum vulgare).	TrEMBL
15482_Transcript_1/1_Confidence_1.000_Length_204_45	204	At3g07790	508	62.5	72	22	3	1	204	3	73	5e-15	77.8	[R] KOG2627 Nuclear protein ES2		KOG
15486_Transcript_3/3_Confidence_0.600_Length_1464_45	1464	ZDHC7_ARATH	345	48.8	334	159	5	114	1091	2	331	3e-89	325	Full=Probable S-acyltransferase At3g18620;	Arabidopsis thaliana (Mouse-ear cress).	Swiss-Prot
1548_Transcript_1/3_Confidence_0.818_Length_2353_45	2353	At1g53570	608	64.74	363	115	3	849	1937	214	563	1e-127	456	[T] KOG0198 MEKK and related serine/threonine protein kinases		KOG
15493_Transcript_1/2_Confidence_1.000_Length_780_45	780	At1g35420	310	57.99	219	87	2	692	39	71	285	1e-72	271	[R] KOG3043 Predicted hydrolase related to dienelactone hydrolase		KOG
15499_Transcript_2/2_Confidence_1.000_Length_750_45	750	At3g02820	326	40	195	92	3	2	577	134	306	2e-31	134	[D] KOG3004 Meiotic chromosome segregation protein		KOG
15509_Transcript_1/1_Confidence_1.000_Length_299_45	299	At5g58900	288	57.95	88	35	2	297	34	165	250	8e-19	90.5	[O] KOG0724 Zuotin and related molecular chaperones (DnaJ superfamily), contains DNA-binding domains		KOG
15518_Transcript_1/1_Confidence_1.000_Length_275_45	275	D7UC01_VITVI	293	71.43	28	8	0	192	109	266	293	2e-06	39.3		Vitis vinifera (Grape).	TrEMBL
15538_Transcript_5/6_Confidence_0.688_Length_2216_45	2216	At4g02940	569	42.81	605	213	14	193	1914	47	549	4e-115	414	[S] KOG4176 Uncharacterized conserved protein		KOG
15539_Transcript_1/1_Confidence_1.000_Length_599_45	599	D3IVU0_9POAL	896	57.37	190	81	0	571	2	10	199	2e-57	223		Phyllostachys edulis.	TrEMBL
15543_Transcript_1/1_Confidence_1.000_Length_848_45	848	SUBL_ARATH	757	37.57	181	106	3	8	544	582	757	4e-26	115	Full=Subtilisin-like protease;	Arabidopsis thaliana (Mouse-ear cress).	Swiss-Prot
1554_Transcript_1/1_Confidence_1.000_Length_4343_45	4343	EXS_ARATH	1192	45.68	1158	584	14	3749	324	64	1192	0	890	Full=Leucine-rich repeat receptor protein kinase EXS;	Arabidopsis thaliana (Mouse-ear cress).	Swiss-Prot
15558_Transcript_1/5_Confidence_0.500_Length_457_45	457	At3g62840	108	87.67	73	9	0	237	455	29	101	7e-32	134	[A] KOG3459 Small nuclear ribonucleoprotein (snRNP) Sm core protein		KOG
15558_Transcript_3/5_Confidence_0.643_Length_516_45	516	At3g62840	108	94.44	54	3	0	353	514	48	101	9e-25	111	[A] KOG3459 Small nuclear ribonucleoprotein (snRNP) Sm core protein		KOG
15558_Transcript_4/5_Confidence_0.571_Length_355_45	355	At3g62840	108	93.81	97	6	0	63	353	5	101	4e-49	191	[A] KOG3459 Small nuclear ribonucleoprotein (snRNP) Sm core protein		KOG
1555_Transcript_1/1_Confidence_1.000_Length_2308_45	2308	E0CUK5_VITVI	731	65.98	682	220	6	2119	98	54	731	0	894		Vitis vinifera (Grape).	TrEMBL
1556_Transcript_3/4_Confidence_0.625_Length_746_45	746	At3g51730	213	42.51	167	95	1	660	160	33	198	1e-37	154	[IG] KOG1340 Prosaposin		KOG
1557_Transcript_1/8_Confidence_0.412_Length_844_45	844	Q9LFF9_PlantCyc_AT3G53620-MONOMER	216	86.79	159	21	0	687	211	58	216	5e-80	292	0	0	PlantCyc
1557_Transcript_4/8_Confidence_0.588_Length_1441_45	1441	Q9LFF9_PlantCyc_AT3G53620-MONOMER	216	86.29	175	23	1	1267	746	1	175	1e-85	311	0	0	PlantCyc
1557_Transcript_5/8_Confidence_0.471_Length_1157_45	1157	Q9LFF9_PlantCyc_AT3G53620-MONOMER	216	85.19	135	19	1	983	582	1	135	6e-99	232	0	0	PlantCyc
15587_Transcript_1/1_Confidence_1.000_Length_568_45	568	RH48_ORYSJ	811	43.36	113	58	4	566	246	37	149	3e-15	78.2	Full=DEAD-box ATP-dependent RNA helicase 48;	Oryza sativa subsp. japonica (Rice).	Swiss-Prot
1558_Transcript_1/2_Confidence_1.000_Length_379_45	379	SCAM2_ORYSJ	286	58.46	65	25	2	194	3	6	69	2e-12	67.8	Full=Secretory carrier-associated membrane protein 2;	Oryza sativa subsp. japonica (Rice).	Swiss-Prot
15590_Transcript_1/1_Confidence_1.000_Length_306_45	306	At1g73460	1157	41.43	70	41	0	89	298	287	356	3e-08	55.1	[R] KOG0667 Dual-specificity tyrosine-phosphorylation regulated kinase		KOG
15595_Transcript_1/1_Confidence_1.000_Length_418_45	418	D7TTZ5_VITVI	188	52.03	123	8	1	82	297	66	188	2e-25	115		Vitis vinifera (Grape).	TrEMBL
15599_Transcript_2/3_Confidence_0.500_Length_693_45	693	At5g50840	372	62.22	45	15	1	295	161	329	371	2e-06	51.2	[Z] KOG1850 Myosin-like coiled-coil protein		KOG
15601_Transcript_1/3_Confidence_0.714_Length_903_45	903	F6HQW1_VITVI	231	47.92	96	44	3	633	361	104	198	1e-08	61.6		Vitis vinifera (Grape).	TrEMBL
15601_Transcript_2/3_Confidence_0.429_Length_474_45	474	F6HQW1_VITVI	231	60.87	69	26	1	470	267	130	198	2e-12	72.8		Vitis vinifera (Grape).	TrEMBL
15609_Transcript_1/2_Confidence_1.000_Length_864_45	864	A5ACP7_VITVI	318	57.83	230	78	4	863	204	97	317	2e-73	277		Vitis vinifera (Grape).	TrEMBL
1560_Transcript_2/2_Confidence_1.000_Length_750_45	750	Y4844_ARATH	153	81.67	60	11	0	410	231	90	149	8e-23	103	Full=Uncharacterized protein At4g28440;	Arabidopsis thaliana (Mouse-ear cress).	Swiss-Prot
15615_Transcript_1/1_Confidence_1.000_Length_469_45	469	PDV1_ARATH	272	34.21	152	96	3	2	454	98	246	9e-18	85.9	Full=Plastid division protein PDV1;	Arabidopsis thaliana (Mouse-ear cress).	Swiss-Prot
15631_Transcript_1/2_Confidence_1.000_Length_1008_45	1008	Q6EPV2_ORYSJ	236	42.32	241	128	3	934	227	1	235	8e-46	185		Oryza sativa subsp. japonica (Rice).	TrEMBL
15662_Transcript_2/3_Confidence_0.714_Length_999_45	999	A2YYB3_ORYSI	245	47.5	120	59	1	120	479	113	228	4e-23	110		Oryza sativa subsp. indica (Rice).	TrEMBL
15664_Transcript_2/3_Confidence_0.714_Length_1096_45	1096	C5XF32_SORBI	171	50	130	50	4	703	341	38	161	6e-24	106		Sorghum bicolor (Sorghum) (Sorghum vulgare).	TrEMBL
15667_Transcript_1/3_Confidence_0.714_Length_1985_45	1985	B9GPY9_POPTR	622	55.98	502	159	5	310	1809	178	619	6e-153	542		Populus trichocarpa (Western balsam poplar) (Populus balsamifera subsp. trichocarpa).	TrEMBL
15667_Transcript_2/3_Confidence_0.714_Length_1826_45	1826	D7UC49_VITVI	646	60.88	455	171	5	310	1662	195	646	8e-160	565		Vitis vinifera (Grape).	TrEMBL
15669_Transcript_1/1_Confidence_1.000_Length_611_45	611	C5XW21_SORBI	930	53.7	54	22	1	365	517	363	416	4e-06	52.4		Sorghum bicolor (Sorghum) (Sorghum vulgare).	TrEMBL
15673_Transcript_1/1_Confidence_1.000_Length_658_45	658	FB285_ARATH	395	44.21	233	85	5	574	2	21	250	1e-40	162	Full=F-box protein At5g46170;	Arabidopsis thaliana (Mouse-ear cress).	Swiss-Prot
15709_Transcript_1/1_Confidence_1.000_Length_921_45	921	ASPR1_ORYSJ	509	70.04	237	64	2	218	919	24	256	1e-82	302	Full=Aspartic proteinase oryzasin-1;	Oryza sativa subsp. japonica (Rice).	Swiss-Prot
15716_Transcript_1/1_Confidence_1.000_Length_474_45	474	F2CVP1_HORVD	328	53.19	94	39	2	3	281	230	319	2e-14	79		Hordeum vulgare var. distichum (Two-rowed barley).	TrEMBL
15725_Transcript_1/2_Confidence_1.000_Length_793_45	793	At5g47820	1049	59.76	82	33	0	309	64	963	1044	3e-24	100	[Z] KOG0244 Kinesin-like protein		KOG
15734_Transcript_1/1_Confidence_1.000_Length_482_45	482	B3H5J7_ARATH	42	71.43	35	10	0	349	245	8	42	3e-07	55.5		Arabidopsis thaliana (Mouse-ear cress).	TrEMBL
1573_Transcript_4/6_Confidence_0.688_Length_2610_45	2610	At3g23540	568	65.07	292	94	2	849	1709	1	289	3e-112	405	[R] KOG1552 Predicted alpha/beta hydrolase		KOG
15742_Transcript_1/2_Confidence_1.000_Length_530_45	530	B8A7L8_ORYSI	388	60.98	41	14	1	208	86	273	311	5e-08	51.2		Oryza sativa subsp. indica (Rice).	TrEMBL
15744_Transcript_1/1_Confidence_1.000_Length_378_45	378	AP2L1_ARATH	345	86.32	117	16	0	2	352	114	230	2e-48	186	Full=AP2-like ethylene-responsive transcription factor At1g16060;	Arabidopsis thaliana (Mouse-ear cress).	Swiss-Prot
15752_Transcript_3/3_Confidence_0.600_Length_1697_45	1697	At3g13700	296	39.27	275	133	8	153	899	30	296	1e-38	159	[R] KOG1457 RNA binding protein (contains RRM repeats)		KOG
15756_Transcript_1/1_Confidence_1.000_Length_290_45	290	SHR1_ORYSJ	602	72.9	107	18	2	2	289	284	390	3e-37	149	Full=Protein SHORT-ROOT 1;	Oryza sativa subsp. japonica (Rice).	Swiss-Prot
15760_Transcript_1/1_Confidence_1.000_Length_628_45	628	MFP1_TOBAC	722	24.64	211	124	5	99	626	265	475	3e-07	51.6	Full=MAR-binding filament-like protein 1-1;	Nicotiana tabacum (Common tobacco).	Swiss-Prot
1576_Transcript_2/2_Confidence_1.000_Length_849_45	849	At1g09150	181	83.98	181	29	0	112	654	1	181	1e-77	288	[J] KOG2523 Predicted RNA-binding protein with PUA domain		KOG
15773_Transcript_1/1_Confidence_1.000_Length_266_45	266	SPT_ARATH	373	88.89	27	3	0	184	264	191	217	3e-07	50.1	Full=Transcription factor SPATULA;	Arabidopsis thaliana (Mouse-ear cress).	Swiss-Prot
15786_Transcript_1/2_Confidence_1.000_Length_738_45	738	At5g51540	860	58.25	103	37	2	690	382	761	857	8e-19	92.4	[O] KOG2090 Metalloendopeptidase family - mitochondrial intermediate peptidase		KOG
1579_Transcript_1/2_Confidence_1.000_Length_941_45	941	Q53RJ7_ORYSJ	199	58.12	191	70	5	801	250	12	199	1e-48	194		Oryza sativa subsp. japonica (Rice).	TrEMBL
15809_Transcript_1/1_Confidence_1.000_Length_491_45	491	MSH7_ARATH	1109	59.04	166	65	1	2	490	751	916	5e-51	196	Full=DNA mismatch repair protein Msh6-2;	Arabidopsis thaliana (Mouse-ear cress).	Swiss-Prot
1580_Transcript_1/1_Confidence_1.000_Length_3572_45	3572	ACA1_ORYSJ	1020	81.37	1020	189	1	250	3306	1	1020	0	1621	Full=Calcium-transporting ATPase 1, plasma membrane-type;	Oryza sativa subsp. japonica (Rice).	Swiss-Prot
15814_Transcript_1/1_Confidence_1.000_Length_1596_45	1596	At2g20900	493	61.27	488	162	7	1494	88	9	488	5e-173	606	[IT] KOG1169 Diacylglycerol kinase		KOG
15817_Transcript_1/2_Confidence_1.000_Length_356_45	356	E0CPU3_VITVI	448	43.75	48	27	0	158	301	393	440	1e-06	52.8		Vitis vinifera (Grape).	TrEMBL
1581_Transcript_2/4_Confidence_0.700_Length_1567_45	1567	C88A1_MAIZE	519	68.6	449	140	1	3	1346	69	517	0	642	Full=Cytochrome P450 88A1;	Zea mays (Maize).	Swiss-Prot
15831_Transcript_1/1_Confidence_1.000_Length_292_45	292	LRK92_ARATH	675	35.29	102	57	3	5	292	241	339	8e-07	48.5	Full=L-type lectin-domain containing receptor kinase IX.2;	Arabidopsis thaliana (Mouse-ear cress).	Swiss-Prot
15847_Transcript_1/1_Confidence_1.000_Length_347_45	347	D7TBK3_VITVI	342	47.14	70	22	2	203	39	19	88	9e-09	60.1		Vitis vinifera (Grape).	TrEMBL
15851_Transcript_1/1_Confidence_1.000_Length_331_45	331	CLV1_ARATH	980	52.22	90	41	2	327	58	890	977	8e-21	95.1	Full=Receptor protein kinase CLAVATA1;	Arabidopsis thaliana (Mouse-ear cress).	Swiss-Prot
15857_Transcript_5/7_Confidence_0.500_Length_1376_45	1376	F6HPN7_VITVI	958	41.28	109	30	8	1163	867	87	171	7e-06	53.5		Vitis vinifera (Grape).	TrEMBL
15877_Transcript_1/3_Confidence_0.714_Length_1742_45	1742	At1g50440	250	74.25	233	50	3	1442	771	19	250	6e-98	357	[A] KOG1609 Protein involved in mRNA turnover and stability		KOG
15879_Transcript_1/1_Confidence_1.000_Length_1857_45	1857	NRX1_ARATH	578	43.65	543	290	8	1788	196	15	553	6e-117	418	Full=Probable nucleoredoxin 1;	Arabidopsis thaliana (Mouse-ear cress).	Swiss-Prot
15886_Transcript_1/1_Confidence_1.000_Length_226_45	226	LOC_OS03G02030_PlantCyc_LOC_OS03G02030.1-MONOMER	554	69.23	52	16	0	1	156	155	206	9e-18	82.8	0	0	PlantCyc
15889_Transcript_1/4_Confidence_0.667_Length_1253_45	1253	LOC_OS04G35770_PlantCyc_LOC_OS04G35770.1-MONOMER	480	64.77	176	62	0	1	528	303	478	2e-69	257	0	0	PlantCyc
15889_Transcript_4/4_Confidence_0.667_Length_1316_45	1316	LOC_OS04G35770_PlantCyc_LOC_OS04G35770.1-MONOMER	480	64.77	176	62	0	1	528	303	478	2e-69	257	0	0	PlantCyc
15895_Transcript_1/1_Confidence_1.000_Length_256_45	256	AIL5_ARATH	558	96.43	84	3	0	3	254	214	297	4e-44	172	Full=AP2-like ethylene-responsive transcription factor AIL5;	Arabidopsis thaliana (Mouse-ear cress).	Swiss-Prot
1589_Transcript_4/4_Confidence_0.700_Length_471_45	471	At3g61330	1352	48	50	26	0	20	169	336	385	1e-08	57.4	[R] KOG0017 FOG: Transposon-encoded proteins with TYA, reverse transcriptase, integrase domains in various combinations		KOG
15908_Transcript_1/2_Confidence_1.000_Length_370_45	370	B9SCW9_RICCO	419	78.31	83	17	1	248	3	1	83	1e-32	139		Ricinus communis (Castor bean).	TrEMBL
1591_Transcript_2/6_Confidence_0.700_Length_1920_45	1920	LOC_OS12G03720_PlantCyc_LOC_OS12G03720.1-MONOMER	680	84.8	296	45	0	794	1681	385	680	0	500	0	0	PlantCyc
15929_Transcript_1/1_Confidence_1.000_Length_520_45	520	At1g72480	509	58.13	160	62	2	478	2	17	172	6e-47	184	[S] KOG2568 Predicted membrane protein		KOG
1592_Transcript_3/3_Confidence_0.778_Length_1474_45	1474	HEM4_ARATH	321	67.39	46	15	0	502	639	255	300	6e-13	72.4	Full=Uroporphyrinogen-III synthase, chloroplastic;	Arabidopsis thaliana (Mouse-ear cress).	Swiss-Prot
15940_Transcript_1/1_Confidence_1.000_Length_442_45	442	AB5G_ARATH	649	44.8	125	58	2	96	440	1	124	2e-21	97.8	Full=ABC transporter G family member 5;	Arabidopsis thaliana (Mouse-ear cress).	Swiss-Prot
15945_Transcript_1/1_Confidence_1.000_Length_732_45	732	PPR75_ARATH	596	29.15	247	163	5	10	732	131	371	4e-27	118	Full=Pentatricopeptide repeat-containing protein At1g50270;	Arabidopsis thaliana (Mouse-ear cress).	Swiss-Prot
1594_Transcript_2/2_Confidence_1.000_Length_6158_45	6158	At3g14270	1791	40.05	1825	890	47	716	5833	44	1783	0	1128	[T] KOG0230 Phosphatidylinositol-4-phosphate 5-kinase and related FYVE finger-containing proteins		KOG
15963_Transcript_1/1_Confidence_1.000_Length_259_45	259	B6UEV0_MAIZE	471	76	50	12	0	259	110	420	469	2e-15	82		Zea mays (Maize).	TrEMBL
1596_Transcript_2/7_Confidence_0.714_Length_2604_45	2604	P2C06_ORYSJ	467	54.38	217	73	3	1623	979	127	319	4e-108	224	Full=Probable protein phosphatase 2C 6;	Oryza sativa subsp. japonica (Rice).	Swiss-Prot
15970_Transcript_1/2_Confidence_1.000_Length_596_45	596	At2g30710	343	73.58	53	10	1	594	448	238	290	2e-15	80.5	[U] KOG1092 Ypt/Rab-specific GTPase-activating protein GYP1		KOG
15974_Transcript_1/1_Confidence_1.000_Length_261_45	261	Q1EPE2_MUSAC	350	60.71	56	18	2	3	170	249	300	3e-08	58.5		Musa acuminata (Banana) (Musa cavendishii).	TrEMBL
15978_Transcript_1/2_Confidence_1.000_Length_579_45	579	D7T0X4_VITVI	147	61.54	52	18	1	424	579	62	111	3e-10	65.9		Vitis vinifera (Grape).	TrEMBL
1597_Transcript_3/3_Confidence_0.714_Length_1223_45	1223	At5g13760	362	68.27	312	99	0	941	6	4	315	2e-128	457	[I] KOG1362 Choline transporter-like protein		KOG
15990_Transcript_1/2_Confidence_1.000_Length_1244_45	1244	At5g05830	204	63.16	133	43	1	632	252	70	202	5e-36	150	[A] KOG1609 Protein involved in mRNA turnover and stability		KOG
1600_Transcript_1/1_Confidence_1.000_Length_590_45	590	LOC_OS07G10240_PlantCyc_LOC_OS07G10240.1-MONOMER	499	41.98	212	106	3	590	6	54	265	5e-26	112	0	0	PlantCyc
16015_Transcript_1/2_Confidence_1.000_Length_1129_45	1129	At5g50900	555	40.37	322	184	5	1127	171	238	554	1e-58	225	[S] KOG0167 FOG: Armadillo/beta-catenin-like repeats		KOG
16020_Transcript_1/1_Confidence_1.000_Length_878_45	878	Y5673_ARATH	853	23.93	234	157	6	812	129	365	583	4e-07	52	Full=WEB family protein At5g16730, chloroplastic;	Arabidopsis thaliana (Mouse-ear cress).	Swiss-Prot
16029_Transcript_1/1_Confidence_1.000_Length_227_45	227	At1g61000_1	567	51.39	72	35	0	10	225	199	270	1e-14	76.6	[D] KOG4438 Centromere-associated protein NUF2		KOG
16039_Transcript_1/1_Confidence_1.000_Length_210_45	210	F6I0J8_VITVI	902	49.25	67	34	0	7	207	286	352	2e-09	62		Vitis vinifera (Grape).	TrEMBL
16044_Transcript_1/1_Confidence_1.000_Length_266_45	266	At1g29650	1557	34	100	53	3	263	3	1281	1380	6e-08	54.3	[R] KOG1075 FOG: Reverse transcriptase		KOG
16052_Transcript_1/1_Confidence_1.000_Length_467_45	467	At3g21480	1045	55.03	149	63	1	466	32	876	1024	1e-39	160	[KTDL] KOG2043 Signaling protein SWIFT and related BRCT domain proteins		KOG
16062_Transcript_6/6_Confidence_0.615_Length_1314_45	1314	APC4_ARATH	777	56.77	155	64	1	1221	766	392	546	6e-44	175	Full=Anaphase-promoting complex subunit 4;	Arabidopsis thaliana (Mouse-ear cress).	Swiss-Prot
16064_Transcript_1/1_Confidence_1.000_Length_862_45	862	YUC10_ARATH	383	48.61	216	109	2	2	646	159	373	2e-57	219	Full=Flavin-containing monooxygenase YUCCA10;	Arabidopsis thaliana (Mouse-ear cress).	Swiss-Prot
16080_Transcript_1/1_Confidence_1.000_Length_283_45	283	A5APJ0_VITVI	1228	53.03	66	30	1	254	60	298	363	1e-06	52.8		Vitis vinifera (Grape).	TrEMBL
16085_Transcript_1/1_Confidence_1.000_Length_390_45	390	PTR9_ARATH	557	61.21	116	39	1	5	334	373	488	1e-32	134	Full=Probable peptide/nitrate transporter At1g22540;	Arabidopsis thaliana (Mouse-ear cress).	Swiss-Prot
1608_Transcript_2/4_Confidence_0.750_Length_4229_45	4229	PEX1_ARATH	1130	53.3	1077	474	12	3637	428	76	1130	0	1035	Full=Peroxisome biogenesis protein 1;	Arabidopsis thaliana (Mouse-ear cress).	Swiss-Prot
16109_Transcript_1/1_Confidence_1.000_Length_578_45	578	TL15B_ARATH	223	75.9	166	40	0	499	2	40	205	3e-61	231	Full=Thylakoid lumenal 15.0 kDa protein 2, chloroplastic;	Arabidopsis thaliana (Mouse-ear cress).	Swiss-Prot
1610_Transcript_1/6_Confidence_0.571_Length_907_45	907	YSL9_ORYSJ	684	83.68	239	39	0	718	2	52	290	4e-120	427	Full=Probable metal-nicotianamine transporter YSL9;	Oryza sativa subsp. japonica (Rice).	Swiss-Prot
1610_Transcript_3/6_Confidence_0.571_Length_949_45	949	YSL9_ORYSJ	684	86.99	146	19	0	439	2	145	290	3e-113	276	Full=Probable metal-nicotianamine transporter YSL9;	Oryza sativa subsp. japonica (Rice).	Swiss-Prot
1610_Transcript_5/6_Confidence_0.500_Length_1048_45	1048	YSL9_ORYSJ	684	81.76	148	27	0	912	469	52	199	1e-67	253	Full=Probable metal-nicotianamine transporter YSL9;	Oryza sativa subsp. japonica (Rice).	Swiss-Prot
16111_Transcript_2/3_Confidence_0.667_Length_1059_45	1059	MNS4_ARATH	624	63.86	166	51	2	2	499	389	545	2e-60	229	Full=Probable alpha-mannosidase I MNS4;	Arabidopsis thaliana (Mouse-ear cress).	Swiss-Prot
16119_Transcript_1/1_Confidence_1.000_Length_330_45	330	DOF53_ARATH	257	76	75	17	1	283	62	35	109	5e-31	129	Full=Dof zinc finger protein DOF5.3;	Arabidopsis thaliana (Mouse-ear cress).	Swiss-Prot
1611_Transcript_1/1_Confidence_1.000_Length_636_45	636	At1g17430	332	39.88	173	99	3	635	126	161	331	1e-30	131	[R] KOG1454 Predicted hydrolase/acyltransferase (alpha/beta hydrolase superfamily)		KOG
16128_Transcript_1/1_Confidence_1.000_Length_464_45	464	B9SE37_RICCO	119	78.87	71	15	0	3	215	49	119	3e-27	121		Ricinus communis (Castor bean).	TrEMBL
16131_Transcript_1/1_Confidence_1.000_Length_200_45	200	TDR_ARATH	1041	51.52	66	31	1	200	3	447	511	1e-12	68.2	Full=Leucine-rich repeat receptor-like protein kinase TDR;	Arabidopsis thaliana (Mouse-ear cress).	Swiss-Prot
16134_Transcript_2/4_Confidence_0.222_Length_408_45	408	CCR4E_ARATH	454	50.56	89	44	0	137	403	86	174	2e-22	100	Full=Carbon catabolite repressor protein 4 homolog 5;	Arabidopsis thaliana (Mouse-ear cress).	Swiss-Prot
1613_Transcript_1/1_Confidence_1.000_Length_603_45	603	At5g09830	93	77.78	81	18	0	105	347	1	81	5e-31	132	[T] KOG3348 BolA (bacterial stress-induced morphogen)-related protein		KOG
16153_Transcript_3/4_Confidence_0.500_Length_1149_45	1149	INT2_ARATH	580	75.51	98	23	1	1147	857	483	580	1e-38	157	Full=Probable inositol transporter 2;	Arabidopsis thaliana (Mouse-ear cress).	Swiss-Prot
16167_Transcript_1/1_Confidence_1.000_Length_249_45	249	Q9T0H5_PlantCyc_AT4G13550-MONOMER	805	58.93	56	23	0	81	248	88	143	2e-16	78.2	0	0	PlantCyc
16168_Transcript_1/1_Confidence_1.000_Length_265_45	265	LOC_OS05G30750_PlantCyc_LOC_OS05G30750.1-MONOMER	774	92.05	88	7	0	1	264	121	208	2e-45	174	0	0	PlantCyc
16171_Transcript_1/2_Confidence_1.000_Length_446_45	446	MDAR2_ARATH	488	76.56	64	15	0	194	3	238	301	2e-31	98.6	Full=Probable monodehydroascorbate reductase, cytoplasmic isoform 2;	Arabidopsis thaliana (Mouse-ear cress).	Swiss-Prot
16176_Transcript_1/1_Confidence_1.000_Length_475_45	475	RETO_ESCCA	538	44.76	105	55	2	14	325	416	518	4e-23	103	Full=Reticuline oxidase;	Eschscholzia californica (California poppy).	Swiss-Prot
16180_Transcript_1/1_Confidence_1.000_Length_300_45	300	B9GKY3_POPTR	781	66.67	69	23	0	276	70	695	763	3e-12	71.6		Populus trichocarpa (Western balsam poplar) (Populus balsamifera subsp. trichocarpa).	TrEMBL
1618_Transcript_2/7_Confidence_0.381_Length_2858_45	2858	DRL29_ARATH	816	54.62	346	156	1	1659	2696	472	816	2e-145	386	Full=Probable disease resistance protein At4g33300;	Arabidopsis thaliana (Mouse-ear cress).	Swiss-Prot
16193_Transcript_2/3_Confidence_0.714_Length_1213_45	1213	BH007_ARATH	302	50.84	297	100	8	1177	386	19	302	1e-52	203	Full=Transcription factor bHLH7;	Arabidopsis thaliana (Mouse-ear cress).	Swiss-Prot
161_Transcript_3/6_Confidence_0.167_Length_1189_45	1189	B9MVE6_POPTR	228	72.26	155	41	1	599	1057	73	227	8e-56	219		Populus trichocarpa (Western balsam poplar) (Populus balsamifera subsp. trichocarpa).	TrEMBL
161_Transcript_5/6_Confidence_0.583_Length_2389_45	2389	At2g46090	364	64.56	237	84	0	1507	2217	125	361	1e-92	339	[IT] KOG1116 Sphingosine kinase, involved in sphingolipid metabolism		KOG
16213_Transcript_1/2_Confidence_1.000_Length_620_45	620	A2XB43_ORYSI	421	62.5	128	31	1	142	474	42	169	2e-36	153		Oryza sativa subsp. indica (Rice).	TrEMBL
16217_Transcript_3/3_Confidence_0.333_Length_350_45	350	At1g01330	715	62.93	116	43	0	1	348	162	277	8e-40	160	[R] KOG1839 Uncharacterized protein CLU1/cluA/TIF31 involved in mitochondrial morphology/distribution, also found associated with eIF-3		KOG
1621_Transcript_2/3_Confidence_0.750_Length_551_45	551	CPPM_ARATH	339	63.64	110	40	0	549	220	218	327	5e-37	150	Full=Carboxyvinyl-carboxyphosphonate phosphorylmutase, chloroplastic;	Arabidopsis thaliana (Mouse-ear cress).	Swiss-Prot
16231_Transcript_1/2_Confidence_1.000_Length_817_45	817	SPC3B_ARATH	167	76.05	167	40	0	158	658	1	167	6e-75	277	Full=Signal peptidase complex subunit 3B;	Arabidopsis thaliana (Mouse-ear cress).	Swiss-Prot
16245_Transcript_1/1_Confidence_1.000_Length_303_45	303	GCST_PEA	408	84.62	52	8	0	302	147	356	407	5e-22	99	Full=Aminomethyltransferase, mitochondrial;	Pisum sativum (Garden pea).	Swiss-Prot
16252_Transcript_1/1_Confidence_1.000_Length_737_45	737	At5g48050	369	33.59	131	76	2	345	731	1	122	2e-16	84.3	[R] KOG0017 FOG: Transposon-encoded proteins with TYA, reverse transcriptase, integrase domains in various combinations		KOG
1625_Transcript_2/5_Confidence_0.615_Length_1675_45	1675	PP208_ARATH	665	27.63	561	353	6	1655	132	93	653	2e-79	293	Full=Pentatricopeptide repeat-containing protein At3g02490, mitochondrial;	Arabidopsis thaliana (Mouse-ear cress).	Swiss-Prot
16270_Transcript_1/1_Confidence_1.000_Length_845_45	845	NAC22_ARATH	324	43.9	246	106	8	800	159	66	311	4e-47	184	Full=NAC domain-containing protein 21/22;	Arabidopsis thaliana (Mouse-ear cress).	Swiss-Prot
16286_Transcript_2/2_Confidence_1.000_Length_250_45	250	At1g64790	2428	67.44	43	8	1	123	13	1067	1109	7e-07	50.8	[J] KOG1242 Protein containing adaptin N-terminal region		KOG
16290_Transcript_1/1_Confidence_1.000_Length_634_45	634	BH093_ARATH	351	69.51	164	45	1	632	156	188	351	2e-61	231	Full=Transcription factor bHLH93;	Arabidopsis thaliana (Mouse-ear cress).	Swiss-Prot
16299_Transcript_1/1_Confidence_1.000_Length_448_45	448	NSI_ORYSJ	254	60.24	83	32	1	64	309	49	131	7e-23	102	Full=Probable acetyltransferase NSI;	Oryza sativa subsp. japonica (Rice).	Swiss-Prot
1629_Transcript_3/8_Confidence_0.650_Length_2734_45	2734	At4g13350	600	33.33	603	273	22	2436	745	1	513	5e-64	244	[T] KOG0702 Predicted GTPase-activating protein		KOG
1629_Transcript_5/8_Confidence_0.650_Length_2659_45	2659	At4g13350	600	34.08	578	277	20	2361	745	1	513	1e-65	250	[T] KOG0702 Predicted GTPase-activating protein		KOG
16303_Transcript_1/1_Confidence_1.000_Length_940_45	940	B9SPR9_RICCO	234	69.51	223	66	2	66	731	1	222	5e-73	275		Ricinus communis (Castor bean).	TrEMBL
16305_Transcript_1/1_Confidence_1.000_Length_422_45	422	At4g36630	1003	53.24	139	56	1	4	420	10	139	1e-34	143	[U] KOG2063 Vacuolar assembly/sorting proteins VPS39/VAM6/VPS3		KOG
16344_Transcript_1/1_Confidence_1.000_Length_371_45	371	F2CZZ2_HORVD	277	43.65	126	67	1	1	366	107	232	7e-14	77		Hordeum vulgare var. distichum (Two-rowed barley).	TrEMBL
16349_Transcript_1/1_Confidence_1.000_Length_465_45	465	At4g26360	1141	38.78	147	88	1	4	444	603	747	1e-21	100	[R] KOG1075 FOG: Reverse transcriptase		KOG
16360_Transcript_1/1_Confidence_1.000_Length_401_45	401	PP182_ARATH	583	58.65	133	55	0	1	399	139	271	6e-43	169	Full=Pentatricopeptide repeat-containing protein At2g33760;	Arabidopsis thaliana (Mouse-ear cress).	Swiss-Prot
16370_Transcript_1/1_Confidence_1.000_Length_1309_45	1309	Q5WA73_ORYSJ	322	71.29	317	81	3	1162	242	1	317	2e-121	437		Oryza sativa subsp. japonica (Rice).	TrEMBL
16374_Transcript_1/1_Confidence_1.000_Length_377_45	377	At1g70190	208	73.53	68	18	0	313	110	141	208	2e-22	102	[J] KOG1715 Mitochondrial/chloroplast ribosomal protein L12		KOG
16393_Transcript_1/3_Confidence_0.667_Length_1269_45	1269	At5g02230	280	60.06	313	92	5	1136	198	1	280	3e-94	344	[R] KOG3109 Haloacid dehalogenase-like hydrolase		KOG
16397_Transcript_2/2_Confidence_1.000_Length_495_45	495	MDAR4_ARATH	435	72.99	174	36	1	2	490	225	398	5e-71	263	Full=Probable monodehydroascorbate reductase, cytoplasmic isoform 4;	Arabidopsis thaliana (Mouse-ear cress).	Swiss-Prot
1641_Transcript_1/2_Confidence_1.000_Length_662_45	662	CYPH_ALLCE	150	87.23	94	12	0	662	381	56	149	6e-44	173	Full=Peptidyl-prolyl cis-trans isomerase;	Allium cepa (Onion).	Swiss-Prot
16421_Transcript_1/2_Confidence_1.000_Length_700_45	700	B3GT3_ARATH	409	65.62	32	11	0	254	349	16	47	4e-06	48.1	Full=Probable beta-1,3-galactosyltransferase 3;	Arabidopsis thaliana (Mouse-ear cress).	Swiss-Prot
16421_Transcript_2/2_Confidence_1.000_Length_1239_45	1239	At1g05170	404	65.35	329	111	2	254	1237	15	341	1e-123	441	[G] KOG2288 Galactosyltransferases		KOG
16430_Transcript_1/1_Confidence_1.000_Length_298_45	298	Q7XPT5_ORYSJ	2646	70.65	92	27	0	2	277	957	1048	7e-30	130		Oryza sativa subsp. japonica (Rice).	TrEMBL
16441_Transcript_1/1_Confidence_1.000_Length_500_45	500	NPR6_ARATH	467	93.62	47	3	0	143	3	6	52	4e-19	90.5	Full=Regulatory protein NPR6;	Arabidopsis thaliana (Mouse-ear cress).	Swiss-Prot
16448_Transcript_1/1_Confidence_1.000_Length_372_45	372	BLH4_ARATH	627	93.02	43	3	0	186	314	451	493	2e-18	87.4	Full=BEL1-like homeodomain protein 4;	Arabidopsis thaliana (Mouse-ear cress).	Swiss-Prot
16458_Transcript_5/6_Confidence_0.333_Length_692_45	692	CML7_ORYSJ	148	83.33	102	17	0	690	385	47	148	4e-44	174	Full=Probable calcium-binding protein CML7;	Oryza sativa subsp. japonica (Rice).	Swiss-Prot
16470_Transcript_2/2_Confidence_1.000_Length_602_45	602	CSN6A_ARATH	317	70	60	17	1	269	90	259	317	5e-19	90.9	Full=COP9 signalosome complex subunit 6a;	Arabidopsis thaliana (Mouse-ear cress).	Swiss-Prot
1648_Transcript_1/5_Confidence_0.667_Length_2282_45	2282	LOC_OS02G32490_PlantCyc_LOC_OS02G32490.1-MONOMER	705	80.78	718	108	2	2264	114	17	705	0	1193	0	0	PlantCyc
16497_Transcript_1/1_Confidence_1.000_Length_230_45	230	B9PD80_POPTR	168	63.16	76	28	0	3	230	1	76	8e-24	110		Populus trichocarpa (Western balsam poplar) (Populus balsamifera subsp. trichocarpa).	TrEMBL
16501_Transcript_1/1_Confidence_1.000_Length_1082_45	1082	GEM_ARATH	299	73.6	197	51	1	296	883	95	291	8e-76	280	Full=GLABRA2 expression modulator;	Arabidopsis thaliana (Mouse-ear cress).	Swiss-Prot
16508_Transcript_1/1_Confidence_1.000_Length_528_45	528	B9I0V5_POPTR	824	73.86	176	46	0	528	1	429	604	2e-69	262		Populus trichocarpa (Western balsam poplar) (Populus balsamifera subsp. trichocarpa).	TrEMBL
1650_Transcript_1/2_Confidence_1.000_Length_554_45	554	DAG_ANTMA	230	58.06	62	26	0	3	188	123	184	5e-17	84	Full=DAG protein, chloroplastic;	Antirrhinum majus (Garden snapdragon).	Swiss-Prot
16524_Transcript_1/1_Confidence_1.000_Length_266_45	266	PPA1_SOLLC	255	52.46	61	29	0	1	183	194	254	2e-13	70.5	Full=Acid phosphatase 1;	Solanum lycopersicum (Tomato) (Lycopersicon esculentum).	Swiss-Prot
16546_Transcript_1/1_Confidence_1.000_Length_464_45	464	At5g47820	1049	44.44	54	30	0	274	113	869	922	9e-09	57.8	[Z] KOG0244 Kinesin-like protein		KOG
16551_Transcript_1/1_Confidence_1.000_Length_232_45	232	PAN_ARATH	452	52.78	72	34	0	17	232	236	307	3e-19	90.1	Full=Transcription factor PERIANTHIA;	Arabidopsis thaliana (Mouse-ear cress).	Swiss-Prot
1656_Transcript_1/1_Confidence_1.000_Length_380_45	380	At1g04160	1519	85.94	64	9	0	188	379	502	565	5e-28	120	[Z] KOG0160 Myosin class V heavy chain		KOG
16595_Transcript_1/1_Confidence_1.000_Length_226_45	226	SAMT_CLABR	359	36.23	69	44	0	18	224	202	270	2e-11	63.9	Full=Salicylate O-methyltransferase;	Clarkia breweri (Fairy fans) (Eucharidium breweri).	Swiss-Prot
16613_Transcript_5/5_Confidence_0.583_Length_1924_45	1924	R13L1_ARATH	1054	32.8	561	317	16	5	1606	365	892	2e-58	223	Full=Putative disease resistance RPP13-like protein 1;	Arabidopsis thaliana (Mouse-ear cress).	Swiss-Prot
16616_Transcript_1/1_Confidence_1.000_Length_388_45	388	CIPKG_ORYSJ	456	42.11	133	70	2	5	385	264	395	4e-17	83.2	Full=CBL-interacting protein kinase 16;	Oryza sativa subsp. japonica (Rice).	Swiss-Prot
1661_Transcript_1/2_Confidence_1.000_Length_569_45	569	B6SMQ7_MAIZE	240	32.86	140	88	5	498	88	23	159	2e-11	70.1		Zea mays (Maize).	TrEMBL
1662_Transcript_2/2_Confidence_1.000_Length_500_45	500	B9RY63_RICCO	794	74.07	54	13	1	498	340	728	781	4e-13	75.1		Ricinus communis (Castor bean).	TrEMBL
16643_Transcript_1/1_Confidence_1.000_Length_1278_45	1278	IMPL1_ARATH	371	71.89	370	84	3	1233	184	1	370	8e-131	463	Full=Phosphatase IMPL1, chloroplastic;	Arabidopsis thaliana (Mouse-ear cress).	Swiss-Prot
16647_Transcript_1/1_Confidence_1.000_Length_730_45	730	EXS_ARATH	1192	39.13	230	112	5	613	2	24	251	9e-34	140	Full=Leucine-rich repeat receptor protein kinase EXS;	Arabidopsis thaliana (Mouse-ear cress).	Swiss-Prot
16655_Transcript_1/1_Confidence_1.000_Length_2138_45	2138	At5g50230	515	64.75	505	178	0	1605	91	10	514	0	635	[R] KOG0288 WD40 repeat protein TipD		KOG
1665_Transcript_2/3_Confidence_0.600_Length_1520_45	1520	ARFB_ORYSJ	718	32.05	312	188	10	5	925	403	695	1e-23	108	Full=Auxin response factor 2;	Oryza sativa subsp. japonica (Rice).	Swiss-Prot
16662_Transcript_1/1_Confidence_1.000_Length_422_45	422	AKT2_ARATH	802	72	25	7	0	76	2	579	603	2e-06	48.1	Full=Potassium channel AKT2/3;	Arabidopsis thaliana (Mouse-ear cress).	Swiss-Prot
16676_Transcript_1/1_Confidence_1.000_Length_296_45	296	C71A2_SOLME	505	54.41	68	29	2	92	295	17	82	8e-10	58.5	Full=Cytochrome P450 71A2;	Solanum melongena (Eggplant) (Aubergine).	Swiss-Prot
16678_Transcript_1/1_Confidence_1.000_Length_266_45	266	At1g74120	445	46.15	65	35	0	197	3	36	100	4e-10	61.6	[KR] KOG1267 Mitochondrial transcription termination factor, mTERF		KOG
16692_Transcript_1/2_Confidence_1.000_Length_962_45	962	At2g38730	199	85.47	179	26	0	127	663	21	199	2e-92	337	[O] KOG0879 U-snRNP-associated cyclophilin type peptidyl-prolyl cis-trans isomerase		KOG
16698_Transcript_2/5_Confidence_0.455_Length_551_45	551	AMSH2_ARATH	223	57.14	42	18	0	253	378	40	81	6e-13	53.9	Full=AMSH-like ubiquitin thiolesterase 2;	Arabidopsis thaliana (Mouse-ear cress).	Swiss-Prot
16699_Transcript_1/1_Confidence_1.000_Length_301_45	301	ALY3_ARATH	1132	70.59	34	10	0	1	102	1099	1132	5e-09	55.8	Full=Protein ALWAYS EARLY 3;	Arabidopsis thaliana (Mouse-ear cress).	Swiss-Prot
166_Transcript_6/10_Confidence_0.618_Length_1953_45	1953	C3H65_ORYSJ	529	37.62	210	107	5	985	401	211	411	1e-33	131	Full=Zinc finger CCCH domain-containing protein 65;	Oryza sativa subsp. japonica (Rice).	Swiss-Prot
166_Transcript_9/10_Confidence_0.676_Length_2217_45	2217	C3H65_ORYSJ	529	37.62	210	107	5	1015	431	211	411	1e-33	131	Full=Zinc finger CCCH domain-containing protein 65;	Oryza sativa subsp. japonica (Rice).	Swiss-Prot
16700_Transcript_1/1_Confidence_1.000_Length_1336_45	1336	At1g04200	766	55.6	482	173	7	1	1335	56	533	5e-121	433	[R] KOG2225 Proteins containing regions of low-complexity		KOG
16717_Transcript_1/1_Confidence_1.000_Length_228_45	228	At3g54940	363	71.62	74	21	0	5	226	200	273	9e-28	120	[O] KOG1542 Cysteine proteinase Cathepsin F		KOG
16723_Transcript_1/1_Confidence_1.000_Length_650_45	650	E9L0A5_MAIZE	720	27.52	218	112	6	33	548	503	720	1e-09	64.3		Zea mays (Maize).	TrEMBL
16724_Transcript_1/2_Confidence_1.000_Length_607_45	607	C6T215_SOYBN	89	79.75	79	16	0	605	369	10	88	2e-30	132		Glycine max (Soybean) (Glycine hispida).	TrEMBL
16731_Transcript_1/1_Confidence_1.000_Length_904_45	904	C5XF32_SORBI	171	34.51	142	74	5	633	256	32	170	1e-10	68.6		Sorghum bicolor (Sorghum) (Sorghum vulgare).	TrEMBL
16733_Transcript_1/1_Confidence_1.000_Length_1437_45	1437	BH112_ARATH	393	37.03	343	159	13	222	1151	72	390	1e-39	160	Full=Transcription factor bHLH112;	Arabidopsis thaliana (Mouse-ear cress).	Swiss-Prot
16735_Transcript_1/5_Confidence_0.385_Length_1001_45	1001	MAD14_ORYSJ	246	63.97	247	83	2	14	742	1	245	2e-67	252	Full=MADS-box transcription factor 14;	Oryza sativa subsp. japonica (Rice).	Swiss-Prot
16735_Transcript_2/5_Confidence_0.462_Length_1172_45	1172	MAD14_ORYSJ	246	65.86	249	74	4	14	736	1	246	5e-71	265	Full=MADS-box transcription factor 14;	Oryza sativa subsp. japonica (Rice).	Swiss-Prot
1673_Transcript_1/2_Confidence_1.000_Length_1226_45	1226	EBP2_ARATH	293	61.94	247	90	3	365	1096	45	290	6e-62	234	Full=Probable rRNA-processing protein EBP2 homolog;	Arabidopsis thaliana (Mouse-ear cress).	Swiss-Prot
16741_Transcript_1/2_Confidence_1.000_Length_669_45	669	ACP1_CASGL	136	60.84	143	42	3	80	490	1	135	3e-37	151	Full=Acyl carrier protein 1, chloroplastic;	Casuarina glauca (Swamp oak).	Swiss-Prot
16747_Transcript_3/8_Confidence_0.647_Length_2082_45	2082	CDPK2_ORYSJ	533	72.17	327	78	3	225	1199	49	364	2e-130	459	Full=Calcium-dependent protein kinase isoform 2;	Oryza sativa subsp. japonica (Rice).	Swiss-Prot
16747_Transcript_5/8_Confidence_0.529_Length_1881_45	1881	CDPK2_ORYSJ	533	78.87	459	96	1	230	1606	71	528	0	710	Full=Calcium-dependent protein kinase isoform 2;	Oryza sativa subsp. japonica (Rice).	Swiss-Prot
16747_Transcript_7/8_Confidence_0.588_Length_2051_45	2051	CDPK2_ORYSJ	533	71.1	301	75	2	225	1121	49	339	0	416	Full=Calcium-dependent protein kinase isoform 2;	Oryza sativa subsp. japonica (Rice).	Swiss-Prot
16759_Transcript_2/3_Confidence_0.600_Length_894_45	894	SPCS2_ARATH	192	73.33	180	47	1	82	618	11	190	4e-64	241	Full=Probable signal peptidase complex subunit 2;	Arabidopsis thaliana (Mouse-ear cress).	Swiss-Prot
1675_Transcript_1/1_Confidence_1.000_Length_679_45	679	SGN-U580044_PlantCyc_SGN-U313455-MONOMER	150	30.7	114	74	3	621	295	1	114	1e-12	67.8	2-ISOPROPYLMALATE SYNTHASE	Solanum lycopersicum	PlantCyc
16760_Transcript_1/2_Confidence_1.000_Length_718_45	718	C0P7B6_MAIZE	377	53.79	145	60	3	521	105	8	151	3e-38	159		Zea mays (Maize).	TrEMBL
16763_Transcript_1/1_Confidence_1.000_Length_479_45	479	DPE1_ORYSJ	594	52.43	103	18	1	3	311	261	332	1e-23	73.9	Full=4-alpha-glucanotransferase DPE1, chloroplastic/amyloplastic;	Oryza sativa subsp. japonica (Rice).	Swiss-Prot
16777_Transcript_2/4_Confidence_0.500_Length_1097_45	1097	LCAT2_ARATH	633	63.64	33	12	0	834	736	383	415	3e-07	52.8	Full=Phospholipid--sterol O-acyltransferase;	Arabidopsis thaliana (Mouse-ear cress).	Swiss-Prot
16783_Transcript_1/1_Confidence_1.000_Length_619_45	619	LOC_OS04G42690_PlantCyc_LOC_OS04G42690.1-MONOMER	485	58.62	203	83	1	619	11	269	470	3e-57	215	0	0	PlantCyc
16785_Transcript_1/1_Confidence_1.000_Length_718_45	718	RL281_ARATH	143	68.15	135	43	0	38	442	1	135	6e-46	180	Full=60S ribosomal protein L28-1;	Arabidopsis thaliana (Mouse-ear cress).	Swiss-Prot
16787_Transcript_2/3_Confidence_0.714_Length_946_45	946	Y5486_ARATH	130	81.3	123	22	1	274	639	1	123	1e-57	219	Full=Uncharacterized protein At5g64816;	Arabidopsis thaliana (Mouse-ear cress).	Swiss-Prot
1678_Transcript_1/1_Confidence_1.000_Length_881_45	881	ESCA_ARATH	311	33.85	130	74	2	34	396	116	242	2e-11	66.2	Full=Putative DNA-binding protein ESCAROLA;	Arabidopsis thaliana (Mouse-ear cress).	Swiss-Prot
16798_Transcript_1/1_Confidence_1.000_Length_1802_45	1802	METK_DENCR	395	94.37	391	22	0	179	1351	5	395	0	737	Full=S-adenosylmethionine synthase;	Dendrobium crumenatum (Tropical pigeon orchid).	Swiss-Prot
16807_Transcript_7/9_Confidence_0.542_Length_2340_45	2340	IMA1B_ORYSJ	534	81.31	535	92	3	2147	561	1	533	0	826	Full=Importin subunit alpha-1b;	Oryza sativa subsp. japonica (Rice).	Swiss-Prot
16811_Transcript_1/3_Confidence_0.571_Length_569_45	569	LOC_OS09G15500_PlantCyc_LOC_OS09G15500.1-MONOMER	328	51.95	154	45	1	463	2	26	150	5e-38	151	0	0	PlantCyc
16811_Transcript_2/3_Confidence_0.714_Length_667_45	667	LOC_OS09G15500_PlantCyc_LOC_OS09G15500.1-MONOMER	328	63.96	111	40	0	561	229	26	136	6e-37	148	0	0	PlantCyc
16816_Transcript_4/5_Confidence_0.308_Length_1422_45	1422	SGN-U564210_PlantCyc_SGN-U321575-MONOMER	251	73.66	205	54	0	526	1140	39	243	1e-86	315	LYSINE DECARBOXYLASE	Solanum lycopersicum	PlantCyc
16816_Transcript_5/5_Confidence_0.538_Length_1728_45	1728	SGN-U564210_PlantCyc_SGN-U321575-MONOMER	251	70.23	131	39	0	1224	1616	119	249	5e-50	193	LYSINE DECARBOXYLASE	Solanum lycopersicum	PlantCyc
16835_Transcript_2/2_Confidence_1.000_Length_1114_45	1114	Q8S8T4_PlantCyc_AT2G47650-MONOMER	443	91.75	315	26	0	2	946	127	441	3e-174	605	UDP-glucuronate decarboxylase	Arabidopsis thaliana	PlantCyc
16843_Transcript_3/3_Confidence_0.600_Length_1137_45	1137	B3TLS7_ELAGV	270	75.46	269	65	1	96	902	1	268	6e-104	379		Elaeis guineensis var. tenera (Oil palm).	TrEMBL
1684_Transcript_1/2_Confidence_1.000_Length_2213_45	2213	F6I4T0_VITVI	601	46.03	617	255	19	1897	203	1	591	6e-90	333		Vitis vinifera (Grape).	TrEMBL
16852_Transcript_1/2_Confidence_1.000_Length_1527_45	1527	MTK1_ORYSJ	430	75.25	400	99	0	13	1212	15	414	0	634	Full=Methylthioribose kinase 1;	Oryza sativa subsp. japonica (Rice).	Swiss-Prot
16860_Transcript_2/3_Confidence_0.714_Length_2924_45	2924	At1g79150	495	51.26	476	225	4	76	1497	6	476	3e-124	445	[JU] KOG2153 Protein involved in the nuclear export of pre-ribosomes		KOG
16875_Transcript_3/3_Confidence_0.600_Length_822_45	822	GEML8_ARATH	219	54.44	180	72	1	144	683	45	214	2e-48	189	Full=Putative GEM-like protein 8;	Arabidopsis thaliana (Mouse-ear cress).	Swiss-Prot
1687_Transcript_4/4_Confidence_0.571_Length_635_45	635	RL222_ARATH	124	86.24	109	14	1	70	396	17	124	5e-40	160	Full=60S ribosomal protein L22-2;	Arabidopsis thaliana (Mouse-ear cress).	Swiss-Prot
16884_Transcript_2/3_Confidence_0.667_Length_513_45	513	REMO_SOLTU	198	41.58	101	59	0	448	146	93	193	5e-16	80.5	Full=Remorin;	Solanum tuberosum (Potato).	Swiss-Prot
16885_Transcript_1/4_Confidence_0.625_Length_659_45	659	INO1_SESIN	510	88.81	134	15	0	589	188	377	510	2e-62	235	Full=Inositol-3-phosphate synthase;	Sesamum indicum (Oriental sesame) (Sesamum orientale).	Swiss-Prot
16886_Transcript_2/2_Confidence_1.000_Length_395_45	395	RS28_MAIZE	65	94.12	51	3	0	392	240	1	51	8e-21	95.5	Full=40S ribosomal protein S28;	Zea mays (Maize).	Swiss-Prot
16892_Transcript_1/1_Confidence_1.000_Length_651_45	651	Q9LMA6_PlantCyc_AT1G19200-MONOMER	222	35	120	67	4	592	266	98	217	4e-10	59.3	0	0	PlantCyc
16899_Transcript_2/3_Confidence_0.714_Length_612_45	612	F6H8S1_VITVI	875	66.04	53	18	0	611	453	818	870	7e-15	81.6		Vitis vinifera (Grape).	TrEMBL
168_Transcript_1/2_Confidence_1.000_Length_1808_45	1808	At2g33440	475	42.67	300	115	3	1740	841	189	431	1e-50	200	[A] KOG0120 Splicing factor U2AF, large subunit (RRM superfamily)		KOG
16907_Transcript_1/2_Confidence_1.000_Length_1556_45	1556	SUBL_ARATH	757	58.45	438	177	4	1554	253	320	756	3e-138	488	Full=Subtilisin-like protease;	Arabidopsis thaliana (Mouse-ear cress).	Swiss-Prot
16924_Transcript_2/6_Confidence_0.529_Length_1948_45	1948	ERF1Z_ARATH	435	91.36	359	30	1	1	1077	78	435	0	661	Full=Eukaryotic peptide chain release factor subunit 1-3;	Arabidopsis thaliana (Mouse-ear cress).	Swiss-Prot
16930_Transcript_2/3_Confidence_0.500_Length_818_45	818	SNL2_ARATH	1367	50.26	189	91	1	818	252	1180	1365	1e-46	182	Full=Paired amphipathic helix protein Sin3-like 2;	Arabidopsis thaliana (Mouse-ear cress).	Swiss-Prot
16939_Transcript_1/3_Confidence_0.222_Length_1235_45	1235	UBC4_SOLLC	148	82.72	81	11	2	245	3	51	128	1e-30	130	Full=Ubiquitin-conjugating enzyme E2-17 kDa;	Solanum lycopersicum (Tomato) (Lycopersicon esculentum).	Swiss-Prot
16939_Transcript_2/3_Confidence_0.556_Length_596_45	596	UBC9_ARATH	148	95.31	128	6	0	386	3	1	128	5e-71	263	Full=SUMO-conjugating enzyme UBC9;	Arabidopsis thaliana (Mouse-ear cress).	Swiss-Prot
16950_Transcript_2/5_Confidence_0.750_Length_1247_45	1247	CHI1_ORYSJ	323	76.42	123	29	0	572	204	199	321	2e-105	210	Full=Chitinase 1;	Oryza sativa subsp. japonica (Rice).	Swiss-Prot
16950_Transcript_4/5_Confidence_0.625_Length_1138_45	1138	CHI1_ORYSJ	323	63.92	316	103	3	1136	204	12	321	1e-102	369	Full=Chitinase 1;	Oryza sativa subsp. japonica (Rice).	Swiss-Prot
16963_Transcript_1/1_Confidence_1.000_Length_1609_45	1609	KO1_ARATH	509	59.63	493	191	5	75	1529	15	507	1e-169	592	Full=Ent-kaurene oxidase, chloroplastic;	Arabidopsis thaliana (Mouse-ear cress).	Swiss-Prot
16965_Transcript_1/1_Confidence_1.000_Length_230_45	230	ENO_ORYSJ	446	96.55	29	1	0	1	87	244	272	5e-18	60.1	Full=Enolase;	Oryza sativa subsp. japonica (Rice).	Swiss-Prot
16976_Transcript_3/3_Confidence_0.600_Length_3694_45	3694	At3g13290	1322	48.16	1221	551	23	3	3584	157	1322	0	976	[R] KOG1916 Nuclear protein, contains WD40 repeats		KOG
16982_Transcript_3/3_Confidence_0.600_Length_1028_45	1028	Q84QR4_ORYSJ	260	55.07	227	79	3	201	824	24	246	1e-61	238		Oryza sativa subsp. japonica (Rice).	TrEMBL
16988_Transcript_1/2_Confidence_1.000_Length_554_45	554	RL321_ARATH	133	85.47	117	17	0	1	351	17	133	8e-55	209	Full=60S ribosomal protein L32-1;	Arabidopsis thaliana (Mouse-ear cress).	Swiss-Prot
16993_Transcript_2/3_Confidence_0.667_Length_1124_45	1124	RL8_SOLLC	260	92.66	259	19	0	123	899	1	259	5e-144	507	Full=60S ribosomal protein L8;	Solanum lycopersicum (Tomato) (Lycopersicon esculentum).	Swiss-Prot
17015_Transcript_1/1_Confidence_1.000_Length_1221_45	1221	SSRA_ARATH	258	57.89	228	90	2	1071	400	23	248	1e-71	267	Full=Translocon-associated protein subunit alpha;	Arabidopsis thaliana (Mouse-ear cress).	Swiss-Prot
17019_Transcript_1/1_Confidence_1.000_Length_608_45	608	Q2VET5_ASPOF	240	80.65	31	6	0	3	95	210	240	7e-09	61.6		Asparagus officinalis (Garden asparagus).	TrEMBL
17024_Transcript_1/2_Confidence_1.000_Length_563_45	563	7290522	89	69.41	85	26	0	534	280	5	89	3e-31	133	[Z] KOG3430 Dynein light chain type 1		KOG
17029_Transcript_1/2_Confidence_1.000_Length_923_45	923	LOC_OS02G08270_PlantCyc_LOC_OS02G08270.1-MONOMER	299	45.3	117	61	1	4	345	67	183	1e-23	105	0	0	PlantCyc
17032_Transcript_2/2_Confidence_1.000_Length_950_45	950	Hs20357578	594	33.7	276	152	10	809	6	62	314	3e-32	137	[A] KOG0117 Heterogeneous nuclear ribonucleoprotein R (RRM superfamily)		KOG
17039_Transcript_6/7_Confidence_0.467_Length_811_45	811	MY1R1_SOLTU	297	74.24	66	17	0	768	571	94	159	2e-26	116	Full=Transcription factor MYB1R1;	Solanum tuberosum (Potato).	Swiss-Prot
1703_Transcript_1/2_Confidence_1.000_Length_2648_45	2648	C5WYV2_SORBI	783	30.03	756	407	21	258	2249	27	752	4e-75	284		Sorghum bicolor (Sorghum) (Sorghum vulgare).	TrEMBL
17044_Transcript_1/1_Confidence_1.000_Length_2204_45	2204	At5g08500	590	71.31	582	151	3	3	1736	21	590	0	855	[R] KOG2489 Transmembrane protein		KOG
17050_Transcript_2/3_Confidence_0.400_Length_1105_45	1105	D7THR3_VITVI	274	49.1	279	116	4	1056	283	1	274	4e-60	233		Vitis vinifera (Grape).	TrEMBL
17061_Transcript_1/2_Confidence_1.000_Length_3069_45	3069	Q94A41_PlantCyc_AT1G69830-MONOMER	887	62.84	853	286	9	255	2807	64	887	0	1108	alpha-amylase	Arabidopsis thaliana	PlantCyc
17067_Transcript_2/6_Confidence_0.588_Length_2747_45	2747	At3g59820	755	61.86	763	248	8	2269	2	1	727	0	710	[S] KOG1043 Ca2+-binding transmembrane protein LETM1/MRS7		KOG
1706_Transcript_3/7_Confidence_0.611_Length_2111_45	2111	ERF1_ORYSJ	365	44.24	278	124	9	1125	334	99	359	9e-45	178	Full=Ethylene-responsive transcription factor 1;	Oryza sativa subsp. japonica (Rice).	Swiss-Prot
17073_Transcript_2/3_Confidence_0.714_Length_1640_45	1640	ILL1_ORYSJ	442	48.26	259	100	6	569	1342	160	385	2e-46	184	Full=IAA-amino acid hydrolase ILR1-like 1;	Oryza sativa subsp. japonica (Rice).	Swiss-Prot
17074_Transcript_2/3_Confidence_0.286_Length_322_45	322	At1g14670	592	82.67	75	13	0	96	320	14	88	3e-31	131	[U] KOG1277 Endosomal membrane proteins, EMP70		KOG
17078_Transcript_1/1_Confidence_1.000_Length_1437_45	1437	Q5ZEJ4_ORYSJ	358	69.74	347	105	0	1226	186	4	350	5e-135	482		Oryza sativa subsp. japonica (Rice).	TrEMBL
17079_Transcript_1/1_Confidence_1.000_Length_215_45	215	At5g52590	338	65.96	47	15	1	1	141	293	338	3e-11	65.1	[T] KOG2197 Ypt/Rab-specific GTPase-activating protein GYP7 and related proteins		KOG
17084_Transcript_1/4_Confidence_0.133_Length_547_45	547	UBIQP_AVEFA	305	100	94	0	0	3	284	212	305	2e-47	184	Full=Polyubiquitin;	Avena fatua (Wild oats).	Swiss-Prot
17088_Transcript_1/3_Confidence_0.667_Length_686_45	686	At1g58140	1320	55.16	223	100	0	4	672	992	1214	6e-66	248	[R] KOG0017 FOG: Transposon-encoded proteins with TYA, reverse transcriptase, integrase domains in various combinations		KOG
1708_Transcript_3/4_Confidence_0.444_Length_2427_45	2427	F6HRZ1_VITVI	213	58.54	82	34	0	2426	2181	129	210	1e-18	96.7		Vitis vinifera (Grape).	TrEMBL
1711_Transcript_4/4_Confidence_0.636_Length_3100_45	3100	PUM2_ARATH	972	47.31	947	390	23	3098	300	114	965	0	707	Full=Pumilio homolog 2;	Arabidopsis thaliana (Mouse-ear cress).	Swiss-Prot
17124_Transcript_1/1_Confidence_1.000_Length_1400_45	1400	SUBL_ARATH	757	54.88	461	195	6	7	1383	261	710	5e-131	464	Full=Subtilisin-like protease;	Arabidopsis thaliana (Mouse-ear cress).	Swiss-Prot
17125_Transcript_1/2_Confidence_1.000_Length_339_45	339	CNR2_MAIZE	181	62	50	18	1	72	221	36	84	1e-14	74.7	Full=Cell number regulator 2;	Zea mays (Maize).	Swiss-Prot
17145_Transcript_1/1_Confidence_1.000_Length_1108_45	1108	At2g34050	210	53.47	202	56	1	186	791	47	210	5e-56	216	[O] KOG3281 Mitochondrial F1-ATPase assembly protein		KOG
1714_Transcript_1/1_Confidence_1.000_Length_1436_45	1436	At5g40490	423	58.62	203	78	3	93	686	29	230	1e-63	243	[R] KOG0118 FOG: RRM domain		KOG
17157_Transcript_3/3_Confidence_0.600_Length_1223_45	1223	At3g12300	238	84.39	173	27	0	392	910	1	173	9e-84	309	[K] KOG3213 Transcription factor IIB		KOG
17158_Transcript_1/3_Confidence_0.625_Length_1019_45	1019	SGN-U580093_PlantCyc_SGN-U338901-MONOMER;	231	86.21	145	20	0	138	572	52	196	9e-80	251	0	0	PlantCyc
17161_Transcript_1/4_Confidence_0.625_Length_852_45	852	FOMT2_WHEAT	356	65.35	101	35	0	479	177	256	356	9e-72	149	Full=Tricetin 3',4',5'-O-trimethyltransferase;	Triticum aestivum (Wheat).	Swiss-Prot
17166_Transcript_1/6_Confidence_0.462_Length_576_45	576	At3g03720	614	70.23	131	35	1	575	183	24	150	5e-49	192	[E] KOG1286 Amino acid transporters		KOG
17166_Transcript_4/6_Confidence_0.538_Length_721_45	721	At5g36940	632	83.95	81	13	0	720	478	29	109	7e-34	142	[E] KOG1286 Amino acid transporters		KOG
17168_Transcript_1/2_Confidence_1.000_Length_1666_45	1666	At4g17830	401	80.5	400	77	1	166	1365	1	399	0	678	[E] KOG2276 Metalloexopeptidases		KOG
1717_Transcript_1/3_Confidence_0.667_Length_771_45	771	USPAL_ARATH	175	41.94	62	35	1	566	381	101	161	8e-07	50.8	Full=Universal stress protein A-like protein;	Arabidopsis thaliana (Mouse-ear cress).	Swiss-Prot
1717_Transcript_2/3_Confidence_0.667_Length_849_45	849	USPAL_ARATH	175	41.94	62	35	1	644	459	101	161	9e-07	50.8	Full=Universal stress protein A-like protein;	Arabidopsis thaliana (Mouse-ear cress).	Swiss-Prot
17187_Transcript_1/1_Confidence_1.000_Length_1296_45	1296	IAA6_ORYSJ	335	47.7	239	98	4	745	74	108	334	1e-48	191	Full=Auxin-responsive protein IAA6;	Oryza sativa subsp. japonica (Rice).	Swiss-Prot
17198_Transcript_1/1_Confidence_1.000_Length_2287_45	2287	SRF6_ARATH	719	60.41	394	137	7	1354	209	310	696	6e-124	441	Full=Protein STRUBBELIG-RECEPTOR FAMILY 6;	Arabidopsis thaliana (Mouse-ear cress).	Swiss-Prot
17214_Transcript_3/4_Confidence_0.571_Length_1053_45	1053	PSA2A_ARATH	235	91.06	235	21	0	85	789	1	235	6e-118	420	Full=Proteasome subunit alpha type-2-A;	Arabidopsis thaliana (Mouse-ear cress).	Swiss-Prot
17228_Transcript_1/2_Confidence_1.000_Length_766_45	766	GLGS1_VICFA	508	88.79	107	12	0	253	573	395	501	2e-49	192	Full=Glucose-1-phosphate adenylyltransferase small subunit 1, chloroplastic;	Vicia faba (Broad bean) (Faba vulgaris).	Swiss-Prot
17245_Transcript_2/3_Confidence_0.875_Length_1839_45	1839	F6HLH3_VITVI	1284	72.57	463	109	4	1668	331	1	462	9e-172	605		Vitis vinifera (Grape).	TrEMBL
17259_Transcript_2/3_Confidence_0.500_Length_624_45	624	RL37A_ORYSJ	92	96.74	92	3	0	562	287	1	92	9e-48	186	Full=60S ribosomal protein L37a;	Oryza sativa subsp. japonica (Rice).	Swiss-Prot
17273_Transcript_1/2_Confidence_1.000_Length_1565_45	1565	SYP52_ARATH	233	54.76	210	95	0	788	159	1	210	2e-59	227	Full=Syntaxin-52;	Arabidopsis thaliana (Mouse-ear cress).	Swiss-Prot
17276_Transcript_1/2_Confidence_1.000_Length_1118_45	1118	At2g30890	257	44.79	192	103	2	851	285	37	228	9e-38	156	[T] KOG4293 Predicted membrane protein, contains DoH and Cytochrome b-561/ferric reductase transmembrane domains		KOG
17276_Transcript_2/2_Confidence_1.000_Length_868_45	868	At4g18260	545	34.65	101	62	3	640	347	34	133	7e-07	53.1	[T] KOG4293 Predicted membrane protein, contains DoH and Cytochrome b-561/ferric reductase transmembrane domains		KOG
17286_Transcript_2/2_Confidence_1.000_Length_360_45	360	At3g54950	488	50	50	25	0	2	151	417	466	1e-07	53.1	[I] KOG0513 Ca2+-independent phospholipase A2		KOG
1729_Transcript_8/9_Confidence_0.630_Length_3246_45	3246	At1g67680	664	39.38	226	130	3	1064	408	347	572	3e-39	144	[U] KOG2376 Signal recognition particle, subunit Srp72		KOG
17304_Transcript_7/8_Confidence_0.458_Length_1104_45	1104	B9GIW5_POPTR	492	37.09	213	122	5	722	102	273	479	8e-30	107		Populus trichocarpa (Western balsam poplar) (Populus balsamifera subsp. trichocarpa).	TrEMBL
17306_Transcript_2/2_Confidence_1.000_Length_929_45	929	At1g34350	1587	50	108	29	1	204	452	1	108	4e-23	107	[R] KOG1881 Anion exchanger adaptor protein Kanadaptin, contains FHA domain		KOG
17308_Transcript_1/1_Confidence_1.000_Length_1508_45	1508	At2g19480	379	79.72	281	55	1	1344	508	20	300	3e-111	400	[BD] KOG1507 Nucleosome assembly protein NAP-1		KOG
17313_Transcript_1/4_Confidence_0.600_Length_1397_45	1397	UBP12_ARATH	1116	83.63	226	36	1	680	3	803	1027	6e-108	387	Full=Ubiquitin carboxyl-terminal hydrolase 12;	Arabidopsis thaliana (Mouse-ear cress).	Swiss-Prot
17313_Transcript_2/4_Confidence_0.700_Length_1394_45	1394	UBP13_ARATH	1115	84.57	188	28	1	564	1	832	1018	3e-102	330	Full=Ubiquitin carboxyl-terminal hydrolase 13;	Arabidopsis thaliana (Mouse-ear cress).	Swiss-Prot
17315_Transcript_2/3_Confidence_0.429_Length_361_45	361	XTH22_ARATH	284	72.09	43	12	0	359	231	239	281	1e-14	74.7	Full=Xyloglucan endotransglucosylase/hydrolase protein 22;	Arabidopsis thaliana (Mouse-ear cress).	Swiss-Prot
17318_Transcript_1/3_Confidence_0.600_Length_258_45	258	A9PFS3_POPTR	146	77.59	58	13	0	84	257	57	114	3e-20	98.2		Populus trichocarpa (Western balsam poplar) (Populus balsamifera subsp. trichocarpa).	TrEMBL
17318_Transcript_2/3_Confidence_0.600_Length_595_45	595	Q65XV6_ORYSJ	146	79	100	21	0	84	383	1	100	7e-41	167		Oryza sativa subsp. japonica (Rice).	TrEMBL
17322_Transcript_1/1_Confidence_1.000_Length_362_45	362	At2g04240	162	54.9	51	21	1	360	214	96	146	5e-13	71.2	[O] KOG0800 FOG: Predicted E3 ubiquitin ligase		KOG
17336_Transcript_1/1_Confidence_1.000_Length_732_45	732	At2g37540	321	62.89	159	59	0	254	730	1	159	4e-42	169	[Q] KOG1208 Dehydrogenases with different specificities (related to short-chain alcohol dehydrogenases)		KOG
17342_Transcript_3/3_Confidence_0.667_Length_1091_45	1091	GOGC6_ARATH	914	66.04	53	18	0	544	702	130	182	2e-12	70.1	Full=Golgin candidate 6;	Arabidopsis thaliana (Mouse-ear cress).	Swiss-Prot
17344_Transcript_2/4_Confidence_0.500_Length_1384_45	1384	VATD_ARATH	261	76.89	264	53	2	1161	385	1	261	1e-110	397	Full=V-type proton ATPase subunit D;	Arabidopsis thaliana (Mouse-ear cress).	Swiss-Prot
17357_Transcript_1/2_Confidence_1.000_Length_885_45	885	G7KW31_MEDTR	731	64.29	28	10	0	418	335	249	276	1e-10	42.4		Medicago truncatula (Barrel medic) (Medicago tribuloides).	TrEMBL
17359_Transcript_1/2_Confidence_1.000_Length_2328_45	2328	XB34_ORYSJ	513	35.19	54	35	0	450	289	460	513	6e-07	53.1	Full=Probable E3 ubiquitin-protein ligase XBOS34;	Oryza sativa subsp. japonica (Rice).	Swiss-Prot
17377_Transcript_1/1_Confidence_1.000_Length_975_45	975	6PGL4_ORYSJ	324	74.43	262	67	0	974	189	63	324	2e-113	405	Full=Probable 6-phosphogluconolactonase 4, chloroplastic;	Oryza sativa subsp. japonica (Rice).	Swiss-Prot
17386_Transcript_1/2_Confidence_1.000_Length_1112_45	1112	RS43_ARATH	262	92.19	256	20	0	1015	248	1	256	2e-127	452	Full=40S ribosomal protein S4-3;	Arabidopsis thaliana (Mouse-ear cress).	Swiss-Prot
17387_Transcript_1/3_Confidence_0.714_Length_1564_45	1564	RGLG2_ARATH	468	57.14	441	126	5	225	1445	57	468	2e-134	476	Full=E3 ubiquitin-protein ligase RGLG2;	Arabidopsis thaliana (Mouse-ear cress).	Swiss-Prot
17397_Transcript_1/3_Confidence_0.600_Length_929_45	929	At1g55110	439	53.62	207	71	6	926	348	125	320	4e-39	160	[R] KOG1721 FOG: Zn-finger		KOG
17401_Transcript_2/2_Confidence_1.000_Length_1884_45	1884	D7UB90_VITVI	575	62.21	553	195	5	1766	150	23	575	1e-161	571		Vitis vinifera (Grape).	TrEMBL
17404_Transcript_1/1_Confidence_1.000_Length_926_45	926	C3H2_ORYSJ	386	47.26	237	87	10	924	310	155	385	4e-32	135	Full=Zinc finger CCCH domain-containing protein 2;	Oryza sativa subsp. japonica (Rice).	Swiss-Prot
17407_Transcript_1/1_Confidence_1.000_Length_361_45	361	C5YF48_SORBI	1625	34.43	122	73	2	1	360	370	486	3e-10	65.1		Sorghum bicolor (Sorghum) (Sorghum vulgare).	TrEMBL
1741_Transcript_1/1_Confidence_1.000_Length_4643_45	4643	C5WSU1_SORBI	1495	31.53	685	428	18	2060	4036	826	1495	1e-71	274		Sorghum bicolor (Sorghum) (Sorghum vulgare).	TrEMBL
17436_Transcript_2/2_Confidence_1.000_Length_1847_45	1847	SLU7_ORYSJ	536	85.07	536	80	0	74	1681	1	536	0	802	Full=Pre-mRNA-splicing factor SLU7;	Oryza sativa subsp. japonica (Rice).	Swiss-Prot
17454_Transcript_1/1_Confidence_1.000_Length_1281_45	1281	At1g33230	348	71.58	278	78	1	1172	342	53	330	1e-112	405	[R] KOG4758 Predicted membrane protein		KOG
1745_Transcript_1/2_Confidence_1.000_Length_960_45	960	RF2A_ORYSJ	380	40.58	207	112	3	114	734	80	275	1e-33	140	Full=Transcription factor RF2a;	Oryza sativa subsp. japonica (Rice).	Swiss-Prot
17462_Transcript_1/1_Confidence_1.000_Length_3674_45	3674	At3g14120	1079	58.84	1108	377	14	153	3338	3	1077	0	1208	[YU] KOG1964 Nuclear pore complex, rNup107 component (sc Nup84)		KOG
17464_Transcript_2/3_Confidence_0.750_Length_2808_45	2808	At4g10730	693	54.56	768	221	15	2798	603	17	692	0	739	[T] KOG0582 Ste20-like serine/threonine protein kinase		KOG
17469_Transcript_1/1_Confidence_1.000_Length_424_45	424	At3g06130	473	52.94	85	34	2	161	415	1	79	5e-18	88.2	[P] KOG1603 Copper chaperone		KOG
17473_Transcript_7/7_Confidence_0.375_Length_1250_45	1250	MY1R1_SOLTU	297	37.01	254	134	7	1017	295	36	276	2e-30	130	Full=Transcription factor MYB1R1;	Solanum tuberosum (Potato).	Swiss-Prot
17474_Transcript_1/2_Confidence_1.000_Length_1259_45	1259	F6GTD4_VITVI	1099	37.01	281	160	7	809	3	73	348	2e-26	121		Vitis vinifera (Grape).	TrEMBL
17486_Transcript_1/1_Confidence_1.000_Length_274_45	274	Y1044_ARATH	665	51.32	76	18	3	3	173	569	644	3e-10	60.1	Full=BTB/POZ domain-containing protein At1g30440;	Arabidopsis thaliana (Mouse-ear cress).	Swiss-Prot
17500_Transcript_1/1_Confidence_1.000_Length_342_45	342	PP301_ARATH	781	39.81	108	63	1	9	332	362	467	2e-18	87	Full=Pentatricopeptide repeat-containing protein At4g02750;	Arabidopsis thaliana (Mouse-ear cress).	Swiss-Prot
17525_Transcript_2/4_Confidence_0.556_Length_507_45	507	Q5QPZ4_WHEAT	580	41.41	99	53	2	283	2	156	254	7e-15	80.9		Triticum aestivum (Wheat).	TrEMBL
1752_Transcript_1/2_Confidence_1.000_Length_1271_45	1271	At3g57410	943	69.64	112	34	0	1268	933	474	585	2e-39	161	[Z] KOG0443 Actin regulatory proteins (gelsolin/villin family)		KOG
17534_Transcript_2/2_Confidence_1.000_Length_1539_45	1539	At1g65650	330	76.9	329	71	1	1394	408	1	324	8e-146	515	[O] KOG2778 Ubiquitin C-terminal hydrolase		KOG
17561_Transcript_1/2_Confidence_1.000_Length_1196_45	1196	C3H41_ORYSJ	368	49.07	269	123	4	427	1194	6	273	3e-71	265	Full=E3 ubiquitin-protein ligase makorin;	Oryza sativa subsp. japonica (Rice).	Swiss-Prot
17561_Transcript_2/2_Confidence_1.000_Length_1152_45	1152	C3H35_ARATH	323	50	156	77	1	686	1150	72	227	5e-65	186	Full=E3 ubiquitin-protein ligase makorin;	Arabidopsis thaliana (Mouse-ear cress).	Swiss-Prot
17563_Transcript_1/1_Confidence_1.000_Length_224_45	224	RLK1_ARATH	832	68.06	72	23	0	1	216	665	736	5e-17	82.4	Full=G-type lectin S-receptor-like serine/threonine-protein kinase RLK1;	Arabidopsis thaliana (Mouse-ear cress).	Swiss-Prot
17568_Transcript_1/1_Confidence_1.000_Length_823_45	823	LEC_GALNI	157	45.83	168	75	2	13	516	4	155	1e-37	153	Full=Mannose-specific lectin;	Galanthus nivalis (Common snowdrop).	Swiss-Prot
17579_Transcript_2/7_Confidence_0.118_Length_613_45	613	At5g08560	589	62.82	78	23	1	409	194	512	589	2e-24	110	[S] KOG0293 WD40 repeat-containing protein		KOG
17605_Transcript_1/1_Confidence_1.000_Length_510_45	510	G7LCY0_MEDTR	348	53.49	129	56	2	132	506	1	129	2e-23	109		Medicago truncatula (Barrel medic) (Medicago tribuloides).	TrEMBL
17609_Transcript_1/1_Confidence_1.000_Length_922_45	922	ALFL7_ORYSJ	267	66.82	217	71	1	3	650	50	266	2e-67	252	Full=PHD finger protein ALFIN-LIKE 7;	Oryza sativa subsp. japonica (Rice).	Swiss-Prot
17610_Transcript_1/2_Confidence_1.000_Length_677_45	677	BRI1_SOLLC	1207	64.44	225	78	2	673	2	407	630	2e-70	261	Full=Brassinosteroid LRR receptor kinase;	Solanum lycopersicum (Tomato) (Lycopersicon esculentum).	Swiss-Prot
1762_Transcript_1/2_Confidence_1.000_Length_1118_45	1118	APX3_ARATH	287	82.11	285	51	0	71	925	1	285	3e-124	441	Full=L-ascorbate peroxidase 3, peroxisomal;	Arabidopsis thaliana (Mouse-ear cress).	Swiss-Prot
17635_Transcript_2/4_Confidence_0.667_Length_2547_45	2547	At3g16060	557	65.44	544	150	6	650	2275	47	554	0	639	[Z] KOG0246 Kinesin-like protein		KOG
17636_Transcript_1/1_Confidence_1.000_Length_1803_45	1803	PSKR1_ARATH	1008	50.75	601	288	7	1801	2	324	917	0	631	Full=Phytosulfokine receptor 1;	Arabidopsis thaliana (Mouse-ear cress).	Swiss-Prot
17654_Transcript_2/5_Confidence_0.583_Length_1270_45	1270	Hs16445426	485	39.44	180	106	3	793	257	307	484	1e-26	119	[R] KOG0266 WD40 repeat-containing protein		KOG
17654_Transcript_4/5_Confidence_0.500_Length_1093_45	1093	PER67_ARATH	316	69.66	89	27	0	267	1	44	132	4e-30	129	Full=Peroxidase 67;	Arabidopsis thaliana (Mouse-ear cress).	Swiss-Prot
17663_Transcript_1/3_Confidence_0.818_Length_1687_45	1687	At2g03120	344	82.87	321	55	0	385	1347	1	321	2e-148	525	[S] KOG2443 Uncharacterized conserved protein		KOG
17667_Transcript_1/1_Confidence_1.000_Length_896_45	896	YCF19_GUITH	91	53.03	66	24	3	519	334	15	77	2e-10	62.8	Full=Uncharacterized protein ycf19;	Guillardia theta (Cryptomonas phi).	Swiss-Prot
17675_Transcript_1/1_Confidence_1.000_Length_689_45	689	TBCA_ARATH	113	72.32	112	30	1	222	554	1	112	3e-32	135	Full=Tubulin-specific chaperone A;	Arabidopsis thaliana (Mouse-ear cress).	Swiss-Prot
17677_Transcript_1/1_Confidence_1.000_Length_291_45	291	At1g65930	410	91.8	61	5	0	107	289	1	61	6e-27	117	[C] KOG1526 NADP-dependent isocitrate dehydrogenase		KOG
17679_Transcript_1/1_Confidence_1.000_Length_741_45	741	C5XRJ0_SORBI	740	43.77	281	121	10	2	739	183	461	5e-34	145		Sorghum bicolor (Sorghum) (Sorghum vulgare).	TrEMBL
17682_Transcript_1/3_Confidence_0.714_Length_1432_45	1432	APL_ARATH	358	41.57	178	94	4	849	334	34	207	4e-31	132	Full=Myb family transcription factor APL;	Arabidopsis thaliana (Mouse-ear cress).	Swiss-Prot
17684_Transcript_1/2_Confidence_1.000_Length_1611_45	1611	At5g60980	459	40.91	462	203	13	1522	179	8	413	1e-69	262	[T] KOG0116 RasGAP SH3 binding protein rasputin, contains NTF2 and RRM domains		KOG
17687_Transcript_2/3_Confidence_0.600_Length_1362_45	1362	C3H53_ORYSJ	682	52.86	384	131	10	3	1064	319	682	3e-74	275	Full=Zinc finger CCCH domain-containing protein 53;	Oryza sativa subsp. japonica (Rice).	Swiss-Prot
17694_Transcript_2/3_Confidence_0.714_Length_470_45	470	Y2706_ARATH	365	91.67	24	2	0	40	111	331	354	1e-06	48.9	Full=Probable receptor-like protein kinase At2g47060;	Arabidopsis thaliana (Mouse-ear cress).	Swiss-Prot
17701_Transcript_1/3_Confidence_0.714_Length_1380_45	1380	HOX4_ORYSJ	277	46.09	243	108	6	384	1058	34	271	3e-48	189	Full=Homeobox-leucine zipper protein HOX4;	Oryza sativa subsp. japonica (Rice).	Swiss-Prot
17704_Transcript_3/6_Confidence_0.286_Length_590_45	590	At3g49180	438	34.09	132	63	4	265	588	256	387	1e-08	58.2	[R] KOG0646 WD40 repeat protein		KOG
17721_Transcript_2/4_Confidence_0.556_Length_1043_45	1043	SR542_SOLLC	499	92.39	276	21	0	215	1042	1	276	2e-125	445	Full=Signal recognition particle 54 kDa protein 2;	Solanum lycopersicum (Tomato) (Lycopersicon esculentum).	Swiss-Prot
17722_Transcript_2/2_Confidence_1.000_Length_494_45	494	At3g05000	173	58.23	79	28	2	405	184	72	150	3e-27	86.7	[U] KOG3316 Transport protein particle (TRAPP) complex subunit		KOG
17734_Transcript_1/1_Confidence_1.000_Length_612_45	612	At5g02230	280	70.27	148	44	0	169	612	1	148	3e-59	226	[R] KOG3109 Haloacid dehalogenase-like hydrolase		KOG
17736_Transcript_3/3_Confidence_0.667_Length_1987_45	1987	ALA8_ARATH	1189	63.71	587	208	1	2	1747	561	1147	0	759	Full=Putative phospholipid-transporting ATPase 8;	Arabidopsis thaliana (Mouse-ear cress).	Swiss-Prot
17740_Transcript_1/1_Confidence_1.000_Length_409_45	409	Q75GJ4_ORYSJ	212	81.48	54	10	0	1	162	131	184	2e-18	92		Oryza sativa subsp. japonica (Rice).	TrEMBL
17751_Transcript_1/1_Confidence_1.000_Length_1741_45	1741	At5g54780	435	55.45	431	171	6	270	1532	10	429	6e-138	489	[T] KOG2197 Ypt/Rab-specific GTPase-activating protein GYP7 and related proteins		KOG
17753_Transcript_1/1_Confidence_1.000_Length_217_45	217	D7U8E2_VITVI	842	85.29	68	10	0	204	1	124	191	6e-28	123		Vitis vinifera (Grape).	TrEMBL
17773_Transcript_1/1_Confidence_1.000_Length_598_45	598	ACA10_ARATH	1069	65.96	94	32	0	2	283	966	1059	7e-36	146	Full=Calcium-transporting ATPase 10, plasma membrane-type;	Arabidopsis thaliana (Mouse-ear cress).	Swiss-Prot
17785_Transcript_3/4_Confidence_0.429_Length_728_45	728	D7U5K5_VITVI	477	55.46	119	48	1	544	203	98	216	4e-33	142		Vitis vinifera (Grape).	TrEMBL
17796_Transcript_1/2_Confidence_1.000_Length_954_45	954	At5g01220	470	82.81	64	11	0	97	288	162	225	2e-25	115	[MOI] KOG1111 N-acetylglucosaminyltransferase complex, subunit PIG-A/SPT14, required for phosphatidylinositol biosynthesis/Sulfolipid synthase		KOG
17798_Transcript_4/4_Confidence_0.750_Length_4441_45	4441	PDR12_ORYSJ	1500	77.12	1412	293	8	4441	245	106	1500	0	2127	Full=Pleiotropic drug resistance protein 12;	Oryza sativa subsp. japonica (Rice).	Swiss-Prot
1779_Transcript_5/5_Confidence_0.667_Length_2167_45	2167	O23025_ARATH	1736	57.26	234	44	3	1113	1814	352	529	1e-83	221		Arabidopsis thaliana (Mouse-ear cress).	TrEMBL
17801_Transcript_1/2_Confidence_1.000_Length_293_45	293	MYB59_ARATH	235	68.09	47	15	0	203	63	68	114	7e-12	65.5	Full=Transcription factor MYB59;	Arabidopsis thaliana (Mouse-ear cress).	Swiss-Prot
17801_Transcript_2/2_Confidence_1.000_Length_354_45	354	MYBA1_ORYSJ	237	80.26	76	15	0	290	63	39	114	6e-35	142	Full=Myb-related protein MYBAS1;	Oryza sativa subsp. japonica (Rice).	Swiss-Prot
17814_Transcript_2/3_Confidence_0.400_Length_793_45	793	D7SMC6_VITVI	652	41.94	62	33	1	662	477	593	651	5e-06	52.8		Vitis vinifera (Grape).	TrEMBL
17823_Transcript_1/2_Confidence_1.000_Length_824_45	824	CUTA1_ORYSJ	177	65.27	167	34	2	758	258	33	175	5e-53	204	Full=Protein CutA 1, chloroplastic;	Oryza sativa subsp. japonica (Rice).	Swiss-Prot
17826_Transcript_1/2_Confidence_1.000_Length_1286_45	1286	MIOX_ORYSJ	308	78.9	308	62	1	169	1083	1	308	3e-151	531	Full=Probable inositol oxygenase;	Oryza sativa subsp. japonica (Rice).	Swiss-Prot
17830_Transcript_1/1_Confidence_1.000_Length_1025_45	1025	NRAM5_ORYSJ	538	73.46	309	81	1	1022	99	219	527	3e-104	375	Full=Metal transporter Nramp5;	Oryza sativa subsp. japonica (Rice).	Swiss-Prot
17851_Transcript_1/2_Confidence_1.000_Length_2546_45	2546	TOC64_PEA	593	33.98	103	60	2	1059	751	473	567	2e-06	51.6	Full=Translocon at the outer membrane of chloroplasts 64;	Pisum sativum (Garden pea).	Swiss-Prot
17859_Transcript_1/2_Confidence_1.000_Length_1629_45	1629	DAG_ANTMA	230	63.85	130	44	1	1352	963	71	197	2e-43	173	Full=DAG protein, chloroplastic;	Antirrhinum majus (Garden snapdragon).	Swiss-Prot
17879_Transcript_1/6_Confidence_0.588_Length_1483_45	1483	At4g36530	378	52.75	345	99	5	446	1294	21	363	1e-92	338	[R] KOG1454 Predicted hydrolase/acyltransferase (alpha/beta hydrolase superfamily)		KOG
1787_Transcript_6/8_Confidence_0.556_Length_5580_45	5580	F6GZ16_VITVI	899	34.64	612	362	13	3713	1938	158	751	5e-60	235		Vitis vinifera (Grape).	TrEMBL
17881_Transcript_1/3_Confidence_0.714_Length_2959_45	2959	At1g17680	882	40.27	894	461	11	2958	313	49	881	2e-165	582	[K] KOG2076 RNA polymerase III transcription factor TFIIIC		KOG
1788_Transcript_2/3_Confidence_0.667_Length_1417_45	1417	SGN-U573424_PlantCyc_SGN-U313497-MONOMER	476	84.94	385	58	0	1406	252	92	476	0	664	ATP sulfurylase	Solanum lycopersicum	PlantCyc
17892_Transcript_2/3_Confidence_0.714_Length_243_45	243	LOC_OS03G29730_PlantCyc_LOC_OS03G29730.1-MONOMER	308	56.16	73	23	1	241	50	102	174	3e-17	80.9	0	0	PlantCyc
17902_Transcript_1/1_Confidence_1.000_Length_491_45	491	F2E7F7_HORVD	132	75	72	18	0	491	276	60	131	3e-19	95.1		Hordeum vulgare var. distichum (Two-rowed barley).	TrEMBL
17906_Transcript_1/3_Confidence_0.714_Length_1688_45	1688	At5g47530	395	42.69	424	176	9	178	1419	14	380	7e-90	330	[T] KOG4293 Predicted membrane protein, contains DoH and Cytochrome b-561/ferric reductase transmembrane domains		KOG
17924_Transcript_1/1_Confidence_1.000_Length_879_45	879	B9F2L6_ORYSJ	460	36.69	139	83	2	97	498	1	139	5e-14	79.7		Oryza sativa subsp. japonica (Rice).	TrEMBL
17931_Transcript_1/2_Confidence_1.000_Length_2782_45	2782	Y2182_ARATH	890	63.66	820	296	2	2781	328	68	887	0	935	Full=Leucine-rich repeat receptor-like tyrosine-protein kinase At2g41820;	Arabidopsis thaliana (Mouse-ear cress).	Swiss-Prot
17932_Transcript_2/5_Confidence_0.333_Length_829_45	829	Q10PG9_ORYSJ	321	51.47	204	86	7	798	214	117	316	2e-42	173		Oryza sativa subsp. japonica (Rice).	TrEMBL
17936_Transcript_2/3_Confidence_0.714_Length_839_45	839	At5g46020	164	88.57	35	4	0	363	259	103	137	5e-11	67	[R] KOG3375 Phosphoprotein/predicted coiled-coil protein		KOG
17936_Transcript_3/3_Confidence_0.714_Length_689_45	689	At5g46020	164	54.74	137	57	2	654	259	1	137	3e-25	113	[R] KOG3375 Phosphoprotein/predicted coiled-coil protein		KOG
17940_Transcript_1/2_Confidence_1.000_Length_2459_45	2459	ARID2_ARATH	573	35.82	201	92	6	1169	582	371	539	3e-26	117	Full=AT-rich interactive domain-containing protein 2;	Arabidopsis thaliana (Mouse-ear cress).	Swiss-Prot
17954_Transcript_1/1_Confidence_1.000_Length_612_45	612	SGN-U576872_PlantCyc_SGN-U322314-MONOMER	440	67.89	109	35	0	610	284	332	440	1e-42	167	ANTHRANILATE PHOSPHORIBOSYLTRANSFERASE	Solanum lycopersicum	PlantCyc
17959_Transcript_3/5_Confidence_0.600_Length_933_45	933	ERF1_ORYSJ	365	73.27	101	26	1	575	877	103	202	3e-20	95.9	Full=Ethylene-responsive transcription factor 1;	Oryza sativa subsp. japonica (Rice).	Swiss-Prot
17967_Transcript_1/1_Confidence_1.000_Length_958_45	958	RLGP1_ORYSJ	226	80.89	225	41	2	858	187	1	224	9e-99	356	Full=Ras-related protein RGP1;	Oryza sativa subsp. japonica (Rice).	Swiss-Prot
17968_Transcript_1/3_Confidence_0.600_Length_494_45	494	SKI15_ARATH	374	46.97	66	28	2	48	245	316	374	1e-10	62.4	Full=SKP1-interacting partner 15;	Arabidopsis thaliana (Mouse-ear cress).	Swiss-Prot
17973_Transcript_4/5_Confidence_0.692_Length_2678_45	2678	LOC_OS01G09000_PlantCyc_LOC_OS01G09000.1-MONOMER	796	79.4	796	158	2	2602	233	1	796	0	1257	0	0	PlantCyc
1797_Transcript_2/3_Confidence_0.750_Length_2465_45	2465	At1g07990	882	35.36	362	180	11	1210	194	552	882	2e-38	160	[D] KOG2073 SAP family cell cycle dependent phosphatase-associated protein		KOG
17986_Transcript_1/3_Confidence_0.667_Length_1440_45	1440	At2g30050	302	81.52	303	54	2	1162	257	1	302	2e-152	537	[U] KOG1332 Vesicle coat complex COPII, subunit SEC13		KOG
1798_Transcript_1/1_Confidence_1.000_Length_897_45	897	At1g49850	248	37.65	170	78	4	196	699	102	245	2e-16	84.7	[O] KOG0800 FOG: Predicted E3 ubiquitin ligase		KOG
17997_Transcript_1/1_Confidence_1.000_Length_451_45	451	B3GTJ_ARATH	681	45.27	148	71	3	421	2	101	246	1e-28	121	Full=Probable beta-1,3-galactosyltransferase 19;	Arabidopsis thaliana (Mouse-ear cress).	Swiss-Prot
179_Transcript_3/4_Confidence_0.667_Length_2449_45	2449	C7342_ORYSJ	557	33.33	108	54	1	1043	720	430	519	2e-10	64.7	Full=Cytochrome P450 734A2;	Oryza sativa subsp. japonica (Rice).	Swiss-Prot
17_Transcript_2/4_Confidence_0.667_Length_2429_45	2429	B9I980_POPTR	619	31.96	582	329	15	2188	587	40	602	3e-59	231		Populus trichocarpa (Western balsam poplar) (Populus balsamifera subsp. trichocarpa).	TrEMBL
18008_Transcript_1/4_Confidence_0.333_Length_565_45	565	SRP19_ARATH	145	62.62	107	40	0	209	529	7	113	6e-36	146	Full=Signal recognition particle 19 kDa protein;	Arabidopsis thaliana (Mouse-ear cress).	Swiss-Prot
18011_Transcript_1/2_Confidence_1.000_Length_548_45	548	DOF46_ARATH	342	91.67	48	4	0	403	546	49	96	3e-24	107	Full=Dof zinc finger protein DOF4.6;	Arabidopsis thaliana (Mouse-ear cress).	Swiss-Prot
18013_Transcript_1/2_Confidence_1.000_Length_1049_45	1049	SRSF1_ARATH	303	70.41	196	50	1	1043	480	1	196	1e-71	266	Full=Pre-mRNA-splicing factor SF2;	Arabidopsis thaliana (Mouse-ear cress).	Swiss-Prot
18016_Transcript_1/2_Confidence_1.000_Length_1411_45	1411	At1g53280	438	68.39	386	121	1	1346	192	53	438	4e-150	530	[RV] KOG2764 Putative transcriptional regulator DJ-1		KOG
18018_Transcript_1/1_Confidence_1.000_Length_408_45	408	PPR48_ARATH	970	55.88	136	59	1	1	405	697	832	6e-36	145	Full=Pentatricopeptide repeat-containing protein At1g18485;	Arabidopsis thaliana (Mouse-ear cress).	Swiss-Prot
1801_Transcript_2/3_Confidence_0.333_Length_379_45	379	VTI13_ARATH	221	71.43	49	14	0	188	334	172	220	1e-09	58.2	Full=Vesicle transport v-SNARE 13;	Arabidopsis thaliana (Mouse-ear cress).	Swiss-Prot
18020_Transcript_1/2_Confidence_1.000_Length_844_45	844	At1g04080	768	51.67	120	55	1	488	838	30	149	2e-29	127	[A] KOG1258 mRNA processing protein		KOG
18047_Transcript_1/7_Confidence_0.500_Length_1210_45	1210	ORYA_ORYSJ	458	65.38	182	59	1	1	546	268	445	1e-67	253	Full=Oryzain alpha chain;	Oryza sativa subsp. japonica (Rice).	Swiss-Prot
18047_Transcript_2/7_Confidence_0.450_Length_1149_45	1149	ORYA_ORYSJ	458	65.38	182	59	1	1	546	268	445	1e-67	253	Full=Oryzain alpha chain;	Oryza sativa subsp. japonica (Rice).	Swiss-Prot
18047_Transcript_4/7_Confidence_0.500_Length_1674_45	1674	ORYA_ORYSJ	458	65.38	182	59	1	1	546	268	445	2e-67	253	Full=Oryzain alpha chain;	Oryza sativa subsp. japonica (Rice).	Swiss-Prot
18048_Transcript_3/4_Confidence_0.545_Length_334_45	334	Q1EPE4_MUSAC	375	56.76	37	15	1	122	12	315	350	5e-07	43.1		Musa acuminata (Banana) (Musa cavendishii).	TrEMBL
18067_Transcript_1/2_Confidence_1.000_Length_2310_45	2310	At3g63240	574	59.49	548	195	10	1941	313	18	543	7e-176	616	[U] KOG0565 Inositol polyphosphate 5-phosphatase and related proteins		KOG
18071_Transcript_1/2_Confidence_1.000_Length_1106_45	1106	OTUBL_ARATH	306	68.36	275	78	3	109	930	28	294	8e-108	387	Full=Ubiquitin thioesterase otubain-like;	Arabidopsis thaliana (Mouse-ear cress).	Swiss-Prot
18079_Transcript_3/3_Confidence_0.600_Length_2890_45	2890	At4g36630	1003	53.62	912	335	11	1	2586	130	1003	0	863	[U] KOG2063 Vacuolar assembly/sorting proteins VPS39/VAM6/VPS3		KOG
1807_Transcript_1/1_Confidence_1.000_Length_871_45	871	At5g64670	281	89.84	187	19	0	2	562	81	267	3e-94	343	[J] KOG0846 Mitochondrial/chloroplast ribosomal protein L15/L10		KOG
18091_Transcript_1/3_Confidence_0.600_Length_605_45	605	PUM4_ARATH	1003	83.91	87	14	0	605	345	909	995	1e-36	149	Full=Pumilio homolog 4;	Arabidopsis thaliana (Mouse-ear cress).	Swiss-Prot
18092_Transcript_1/1_Confidence_1.000_Length_1538_45	1538	AATC_ORYSJ	407	87.19	398	51	0	1479	286	5	402	0	702	Full=Aspartate aminotransferase, cytoplasmic;	Oryza sativa subsp. japonica (Rice).	Swiss-Prot
180_Transcript_3/9_Confidence_0.385_Length_1179_45	1179	At2g06320	466	43.86	114	59	1	332	6	331	444	1e-20	99.4	[R] KOG0017 FOG: Transposon-encoded proteins with TYA, reverse transcriptase, integrase domains in various combinations		KOG
180_Transcript_6/9_Confidence_0.577_Length_1822_45	1822	At2g06320	466	41.94	124	65	2	795	439	325	446	8e-18	90.9	[R] KOG0017 FOG: Transposon-encoded proteins with TYA, reverse transcriptase, integrase domains in various combinations		KOG
18101_Transcript_1/2_Confidence_1.000_Length_543_45	543	At3g07980	1367	91.26	103	9	0	213	521	89	191	2e-55	194	[T] KOG0198 MEKK and related serine/threonine protein kinases		KOG
1810_Transcript_1/1_Confidence_1.000_Length_1640_45	1640	CIPK1_ORYSJ	461	63.76	458	158	3	50	1405	3	458	2e-160	562	Full=CBL-interacting protein kinase 1;	Oryza sativa subsp. japonica (Rice).	Swiss-Prot
18110_Transcript_1/2_Confidence_1.000_Length_1033_45	1033	HDT2_MAIZE	303	58.33	96	34	5	555	271	212	302	4e-21	99	Full=Histone deacetylase HDT2;	Zea mays (Maize).	Swiss-Prot
18113_Transcript_3/9_Confidence_0.435_Length_945_45	945	ACCO_MUSAC	306	79.56	137	25	2	408	4	158	293	2e-105	214	Full=1-aminocyclopropane-1-carboxylate oxidase;	Musa acuminata (Banana) (Musa cavendishii).	Swiss-Prot
18119_Transcript_1/4_Confidence_0.700_Length_1744_45	1744	At4g16710	176	65.88	85	29	0	471	217	92	176	2e-25	115	[R] KOG3349 Predicted glycosyltransferase		KOG
18121_Transcript_2/3_Confidence_0.667_Length_974_45	974	At1g25682	310	64.26	249	88	1	1	747	54	301	2e-84	311	[S] KOG2990 C2C2-type Zn-finger protein		KOG
18126_Transcript_3/3_Confidence_0.667_Length_772_45	772	LOC_OS08G39960_PlantCyc_LOC_OS08G39960.1-MONOMER	284	58.22	213	62	1	743	105	99	284	1e-71	264	0	0	PlantCyc
18131_Transcript_2/3_Confidence_0.778_Length_599_45	599	At5g03330	356	66.67	108	35	1	444	121	250	356	5e-45	160	[TO] KOG2605 OTU (ovarian tumor)-like cysteine protease		KOG
18139_Transcript_1/2_Confidence_1.000_Length_1135_45	1135	RAC3_ORYSJ	214	85.98	214	29	1	159	800	1	213	2e-102	369	Full=Rac-like GTP-binding protein 3;	Oryza sativa subsp. japonica (Rice).	Swiss-Prot
1814_Transcript_1/2_Confidence_1.000_Length_2327_45	2327	At3g09360	600	41.01	612	309	14	2041	242	1	572	4e-103	374	[K] KOG1598 Transcription initiation factor TFIIIB, Brf1 subunit		KOG
18153_Transcript_2/4_Confidence_0.727_Length_948_45	948	A5B6Q8_VITVI	1038	50	62	24	2	23	190	588	648	2e-08	61.6		Vitis vinifera (Grape).	TrEMBL
18154_Transcript_2/5_Confidence_0.714_Length_1288_45	1288	SSY2_SOLTU	767	65.79	152	44	3	1261	812	233	378	3e-49	192	Full=Granule-bound starch synthase 2, chloroplastic/amyloplastic;	Solanum tuberosum (Potato).	Swiss-Prot
18155_Transcript_2/2_Confidence_1.000_Length_639_45	639	PP401_ARATH	766	41.98	212	118	3	628	5	199	409	2e-35	145	Full=Pentatricopeptide repeat-containing protein At5g28460;	Arabidopsis thaliana (Mouse-ear cress).	Swiss-Prot
18156_Transcript_1/2_Confidence_1.000_Length_905_45	905	PP226_ARATH	394	39.15	258	155	1	1	768	133	390	6e-47	184	Full=Pentatricopeptide repeat-containing protein At3g13160, mitochondrial;	Arabidopsis thaliana (Mouse-ear cress).	Swiss-Prot
18158_Transcript_2/2_Confidence_1.000_Length_620_45	620	DPH5_ARATH	277	74.6	63	16	0	383	571	215	277	3e-21	98.2	Full=Probable diphthine synthase;	Arabidopsis thaliana (Mouse-ear cress).	Swiss-Prot
18162_Transcript_1/1_Confidence_1.000_Length_1091_45	1091	At1g49590	242	45.38	238	82	4	815	246	1	238	4e-25	114	[A] KOG0150 Spliceosomal protein FBP21		KOG
18177_Transcript_2/5_Confidence_0.556_Length_972_45	972	Q5JK37_ORYSJ	488	83.08	130	22	0	462	851	359	488	1e-57	224		Oryza sativa subsp. japonica (Rice).	TrEMBL
1817_Transcript_3/4_Confidence_0.571_Length_926_45	926	CSPL8_ARATH	283	47.22	108	57	0	228	551	112	219	2e-16	82.8	Full=CASP-like protein At2g36330;	Arabidopsis thaliana (Mouse-ear cress).	Swiss-Prot
18183_Transcript_2/2_Confidence_1.000_Length_2017_45	2017	At1g60170	511	75.72	486	113	3	1725	277	27	510	1e-148	525	[A] KOG2574 mRNA splicing factor PRP31		KOG
18195_Transcript_2/2_Confidence_1.000_Length_1923_45	1923	C5WQ41_SORBI	380	62.32	276	101	2	116	937	20	294	3e-89	330		Sorghum bicolor (Sorghum) (Sorghum vulgare).	TrEMBL
18204_Transcript_1/2_Confidence_1.000_Length_538_45	538	ARGC_ORYSJ	415	89.58	96	10	0	290	3	88	183	2e-46	181	Full=Probable N-acetyl-gamma-glutamyl-phosphate reductase, chloroplastic;	Oryza sativa subsp. japonica (Rice).	Swiss-Prot
18208_Transcript_2/2_Confidence_1.000_Length_952_45	952	At4g16660	400	58.48	224	87	3	670	2	1	219	1e-61	235	[O] KOG0103 Molecular chaperones HSP105/HSP110/SSE1, HSP70 superfamily		KOG
18216_Transcript_1/1_Confidence_1.000_Length_1010_45	1010	D7TC23_VITVI	160	66.25	160	54	0	150	629	1	160	2e-60	233		Vitis vinifera (Grape).	TrEMBL
18217_Transcript_1/1_Confidence_1.000_Length_755_45	755	SGN-U580044_PlantCyc_SGN-U313455-MONOMER	150	34.21	114	71	2	307	636	1	114	2e-14	74.3	2-ISOPROPYLMALATE SYNTHASE	Solanum lycopersicum	PlantCyc
18236_Transcript_1/2_Confidence_1.000_Length_2934_45	2934	BAME1_ARATH	1003	74.86	915	210	6	51	2789	107	1003	0	1333	Full=Leucine-rich repeat receptor-like serine/threonine-protein kinase BAM1;	Arabidopsis thaliana (Mouse-ear cress).	Swiss-Prot
18242_Transcript_3/3_Confidence_0.600_Length_582_45	582	RK31_ARATH	144	74.44	90	21	2	533	264	47	134	6e-34	140	Full=50S ribosomal protein L31, chloroplastic;	Arabidopsis thaliana (Mouse-ear cress).	Swiss-Prot
1824_Transcript_6/9_Confidence_0.444_Length_1208_45	1208	C3H40_ORYSJ	482	61.81	144	48	3	427	2	281	419	1e-44	177	Full=Zinc finger CCCH domain-containing protein 40;	Oryza sativa subsp. japonica (Rice).	Swiss-Prot
18260_Transcript_1/1_Confidence_1.000_Length_225_45	225	PP211_ARATH	508	52.7	74	35	0	2	223	296	369	6e-16	79	Full=Pentatricopeptide repeat-containing protein At3g04130, mitochondrial;	Arabidopsis thaliana (Mouse-ear cress).	Swiss-Prot
18266_Transcript_1/2_Confidence_1.000_Length_3132_45	3132	MBD8_ARATH	524	40.85	142	78	2	2909	2502	253	394	2e-25	114	Full=Methyl-CpG-binding domain-containing protein 8;	Arabidopsis thaliana (Mouse-ear cress).	Swiss-Prot
18274_Transcript_1/1_Confidence_1.000_Length_431_45	431	F2DGW9_HORVD	142	44.33	97	31	3	46	312	3	84	9e-09	60.1		Hordeum vulgare var. distichum (Two-rowed barley).	TrEMBL
1827_Transcript_1/2_Confidence_1.000_Length_3000_45	3000	ARR2_ARATH	664	51.83	382	169	6	405	1523	3	378	1e-94	345	Full=Two-component response regulator ARR2;	Arabidopsis thaliana (Mouse-ear cress).	Swiss-Prot
18297_Transcript_1/1_Confidence_1.000_Length_801_45	801	Y4844_ARATH	153	68.35	139	38	2	628	230	12	150	7e-48	187	Full=Uncharacterized protein At4g28440;	Arabidopsis thaliana (Mouse-ear cress).	Swiss-Prot
18303_Transcript_3/3_Confidence_0.778_Length_3004_45	3004	E0CVD9_VITVI	1167	23.56	679	397	27	2313	547	346	992	6e-19	98.2		Vitis vinifera (Grape).	TrEMBL
18309_Transcript_2/4_Confidence_0.571_Length_640_45	640	HSP11_SOLLC	154	72.44	127	17	1	381	1	40	148	2e-41	165	Full=17.8 kDa class I heat shock protein;	Solanum lycopersicum (Tomato) (Lycopersicon esculentum).	Swiss-Prot
1830_Transcript_10/10_Confidence_0.613_Length_5404_45	5404	AB2C_ARATH	1623	73.74	1630	417	6	317	5194	1	1623	0	2313	Full=ABC transporter C family member 2;	Arabidopsis thaliana (Mouse-ear cress).	Swiss-Prot
18332_Transcript_1/1_Confidence_1.000_Length_1064_45	1064	D7SQX9_VITVI	377	62.15	251	84	3	324	1064	121	364	8e-79	295		Vitis vinifera (Grape).	TrEMBL
18334_Transcript_1/1_Confidence_1.000_Length_663_45	663	At5g42890	123	71.07	121	34	1	557	198	3	123	4e-45	179	[I] KOG4170 2-enoyl-CoA hydratase/3-hydroxyacyl-CoA dehydrogenase/Peroxisomal 3-ketoacyl-CoA-thiolase, sterol-binding domain and related enzymes		KOG
18340_Transcript_2/2_Confidence_1.000_Length_1059_45	1059	ILR3_ARATH	234	53.14	239	99	5	88	780	1	234	1e-43	173	Full=Transcription factor ILR3;	Arabidopsis thaliana (Mouse-ear cress).	Swiss-Prot
18350_Transcript_1/4_Confidence_0.625_Length_3517_45	3517	At1g75310	1448	30.2	606	340	11	1830	3515	865	1431	1e-51	204	[R] KOG0431 Auxilin-like protein and related proteins containing DnaJ domain		KOG
18353_Transcript_1/2_Confidence_1.000_Length_1661_45	1661	Y3720_ARATH	476	27.97	429	256	11	1463	216	48	436	3e-39	159	Full=UPF0481 protein At3g47200;	Arabidopsis thaliana (Mouse-ear cress).	Swiss-Prot
1835_Transcript_1/1_Confidence_1.000_Length_346_45	346	At2g25320	1660	59.46	111	45	0	338	6	972	1082	3e-29	125	[DR] KOG1987 Speckle-type POZ protein SPOP and related proteins with TRAF, MATH and BTB/POZ domains		KOG
18378_Transcript_2/3_Confidence_0.667_Length_1743_45	1743	U2A2B_NICPL	573	82.6	362	62	1	659	1741	174	535	3e-165	578	Full=Splicing factor U2af large subunit B;	Nicotiana plumbaginifolia (Leadwort-leaved tobacco) (Tex-Mex tobacco).	Swiss-Prot
18382_Transcript_3/4_Confidence_0.667_Length_1157_45	1157	At4g16830	355	38.03	305	143	10	1098	226	83	355	2e-23	108	[R] KOG2945 Predicted RNA-binding protein		KOG
18384_Transcript_1/1_Confidence_1.000_Length_1059_45	1059	B9T4M0_RICCO	371	73.8	271	61	2	124	906	101	371	3e-97	356		Ricinus communis (Castor bean).	TrEMBL
18386_Transcript_3/3_Confidence_0.714_Length_650_45	650	ZDH11_ARATH	340	56.52	138	56	2	109	522	207	340	1e-31	132	Full=Probable S-acyltransferase At3g51390;	Arabidopsis thaliana (Mouse-ear cress).	Swiss-Prot
18388_Transcript_4/4_Confidence_0.625_Length_756_45	756	B9IFF0_POPTR	203	31.11	135	85	3	50	433	1	134	2e-12	73.9		Populus trichocarpa (Western balsam poplar) (Populus balsamifera subsp. trichocarpa).	TrEMBL
18391_Transcript_1/2_Confidence_1.000_Length_812_45	812	HMGL_IPONI	144	74.32	74	19	0	210	431	38	111	9e-28	120	Full=HMG1/2-like protein;	Ipomoea nil (Japanese morning glory) (Pharbitis nil).	Swiss-Prot
18393_Transcript_3/3_Confidence_0.778_Length_729_45	729	HIBC3_ARATH	378	33.59	131	53	1	729	337	10	106	5e-27	70.1	Full=Probable 3-hydroxyisobutyryl-CoA hydrolase 3;	Arabidopsis thaliana (Mouse-ear cress).	Swiss-Prot
1839_Transcript_1/4_Confidence_0.733_Length_1195_45	1195	PPR33_ARATH	405	29.6	348	233	3	1045	2	44	379	2e-44	176	Full=Pentatricopeptide repeat-containing protein At1g11630, mitochondrial;	Arabidopsis thaliana (Mouse-ear cress).	Swiss-Prot
183_Transcript_1/2_Confidence_1.000_Length_3558_45	3558	At1g29940	1114	60.55	1161	383	10	82	3558	5	1092	0	1330	[K] KOG0216 RNA polymerase I, second largest subunit		KOG
18401_Transcript_1/3_Confidence_0.571_Length_1335_45	1335	At2g25710	355	59.29	312	117	4	13	930	47	354	3e-105	380	[H] KOG1536 Biotin holocarboxylase synthetase/biotin-protein ligase		KOG
18407_Transcript_1/1_Confidence_1.000_Length_865_45	865	MT2_MUSAC	78	58.82	51	18	2	237	383	29	78	2e-10	63.2	Full=Metallothionein-like protein type 2;	Musa acuminata (Banana) (Musa cavendishii).	Swiss-Prot
1840_Transcript_2/3_Confidence_0.750_Length_897_45	897	ARFG_ORYSJ	678	65.29	121	42	0	10	372	541	661	8e-33	137	Full=Auxin response factor 7;	Oryza sativa subsp. japonica (Rice).	Swiss-Prot
18421_Transcript_1/1_Confidence_1.000_Length_305_45	305	C5WSY0_SORBI	504	67.57	37	12	0	194	304	10	46	4e-08	57.8		Sorghum bicolor (Sorghum) (Sorghum vulgare).	TrEMBL
18424_Transcript_1/2_Confidence_1.000_Length_945_45	945	At5g58020	354	62.22	270	87	5	943	176	86	354	5e-91	332	[S] KOG3113 Uncharacterized conserved protein		KOG
18436_Transcript_1/1_Confidence_1.000_Length_1063_45	1063	LOC_OS07G46520_PlantCyc_LOC_OS07G46520.1-MONOMER	282	77.27	264	52	1	116	883	19	282	5e-115	409	0	0	PlantCyc
18439_Transcript_1/1_Confidence_1.000_Length_2012_45	2012	FRIGI_ARATH	609	23.92	255	188	2	443	1198	149	400	2e-11	68.2	Full=Protein FRIGIDA;	Arabidopsis thaliana (Mouse-ear cress).	Swiss-Prot
18440_Transcript_1/1_Confidence_1.000_Length_1928_45	1928	D7U1A9_VITVI	375	58.52	393	143	4	1351	173	1	373	8e-118	426		Vitis vinifera (Grape).	TrEMBL
18455_Transcript_2/2_Confidence_1.000_Length_1776_45	1776	B9HHL0_POPTR	688	43.89	401	201	7	69	1250	161	544	4e-58	200		Populus trichocarpa (Western balsam poplar) (Populus balsamifera subsp. trichocarpa).	TrEMBL
18470_Transcript_5/5_Confidence_0.750_Length_3158_45	3158	OML2_ORYSJ	848	57.46	724	273	10	365	2512	56	752	0	792	Full=Protein MEI2-like 2;	Oryza sativa subsp. japonica (Rice).	Swiss-Prot
18471_Transcript_1/1_Confidence_1.000_Length_625_45	625	F6I094_VITVI	528	63.24	185	62	3	624	85	343	526	5e-55	214		Vitis vinifera (Grape).	TrEMBL
18472_Transcript_1/1_Confidence_1.000_Length_328_45	328	B9PA80_POPTR	253	33.66	101	58	2	5	280	132	232	6e-08	57.4		Populus trichocarpa (Western balsam poplar) (Populus balsamifera subsp. trichocarpa).	TrEMBL
1847_Transcript_6/6_Confidence_0.545_Length_2188_45	2188	B120_ARATH	849	46.45	676	330	13	3	1976	188	849	3e-167	585	Full=G-type lectin S-receptor-like serine/threonine-protein kinase B120;	Arabidopsis thaliana (Mouse-ear cress).	Swiss-Prot
18481_Transcript_1/1_Confidence_1.000_Length_273_45	273	At5g04770	583	52.63	95	39	1	7	273	176	270	6e-21	97.4	[E] KOG1286 Amino acid transporters		KOG
18484_Transcript_1/1_Confidence_1.000_Length_649_45	649	CALM_SOLLC	149	93.96	149	9	0	605	159	1	149	8e-76	279	Full=Calmodulin;	Solanum lycopersicum (Tomato) (Lycopersicon esculentum).	Swiss-Prot
18487_Transcript_2/6_Confidence_0.667_Length_1601_45	1601	CAX1A_ORYSJ	451	70	270	78	1	1601	792	95	361	2e-123	349	Full=Vacuolar cation/proton exchanger 1a;	Oryza sativa subsp. japonica (Rice).	Swiss-Prot
18487_Transcript_3/6_Confidence_0.667_Length_1630_45	1630	CAX1A_ORYSJ	451	70.45	308	88	1	1630	707	95	399	2e-123	404	Full=Vacuolar cation/proton exchanger 1a;	Oryza sativa subsp. japonica (Rice).	Swiss-Prot
18493_Transcript_1/1_Confidence_1.000_Length_206_45	206	LOC_OS10G14920_PlantCyc_LOC_OS10G14920.1-MONOMER	364	69.12	68	21	0	205	2	186	253	5e-23	100	0	0	PlantCyc
18499_Transcript_2/3_Confidence_0.667_Length_1724_45	1724	ELP3_ORYSJ	573	95.58	452	20	0	1722	367	121	572	0	870	Full=Elongator complex protein 3;	Oryza sativa subsp. japonica (Rice).	Swiss-Prot
1851_Transcript_1/3_Confidence_0.667_Length_1062_45	1062	DI191_ORYSJ	226	67	100	30	1	184	483	1	97	8e-65	148	Full=Protein DEHYDRATION-INDUCED 19;	Oryza sativa subsp. japonica (Rice).	Swiss-Prot
18526_Transcript_1/2_Confidence_1.000_Length_5921_45	5921	At3g04740	1703	55.37	1815	624	36	1	5313	2	1674	0	1699	[K] KOG1875 Thyroid hormone receptor-associated coactivator complex component (TRAP170)		KOG
1853_Transcript_2/3_Confidence_0.714_Length_1937_45	1937	ASO_TOBAC	578	67.72	570	174	5	32	1720	1	567	0	809	Full=L-ascorbate oxidase;	Nicotiana tabacum (Common tobacco).	Swiss-Prot
18542_Transcript_5/6_Confidence_0.688_Length_733_45	733	At5g36940	632	60.62	193	50	1	581	3	198	364	5e-62	236	[E] KOG1286 Amino acid transporters		KOG
18543_Transcript_1/1_Confidence_1.000_Length_715_45	715	LOC_OS03G18060_PlantCyc_LOC_OS03G18060.1-MONOMER	1688	28.04	107	74	3	373	687	299	404	9e-07	48.5	0	0	PlantCyc
18559_Transcript_1/1_Confidence_1.000_Length_867_45	867	CAX6_ARATH	448	53.33	90	14	1	536	805	316	377	6e-16	81.3	Full=Putative vacuolar cation/proton exchanger 6;	Arabidopsis thaliana (Mouse-ear cress).	Swiss-Prot
1855_Transcript_1/4_Confidence_0.625_Length_1448_45	1448	CADH6_ORYSJ	360	76.85	298	66	1	37	921	2	299	3e-153	464	Full=Probable cinnamyl alcohol dehydrogenase 6;	Oryza sativa subsp. japonica (Rice).	Swiss-Prot
1855_Transcript_2/4_Confidence_0.625_Length_1224_45	1224	CADH6_ORYSJ	360	72.16	291	78	1	118	981	70	360	8e-120	427	Full=Probable cinnamyl alcohol dehydrogenase 6;	Oryza sativa subsp. japonica (Rice).	Swiss-Prot
18567_Transcript_2/3_Confidence_0.500_Length_583_45	583	At5g01230	287	74.03	181	32	1	1	543	117	282	2e-75	279	[DR] KOG1099 SAM-dependent methyltransferase/cell division protein FtsJ		KOG
18578_Transcript_2/7_Confidence_0.588_Length_3921_45	3921	At4g29060	953	65.87	589	187	7	1986	3746	376	952	0	669	[J] KOG1071 Mitochondrial translation elongation factor EF-Tsmt, catalyzes nucleotide exchange on EF-Tumt		KOG
18585_Transcript_1/1_Confidence_1.000_Length_810_45	810	At1g11400	204	36.55	197	104	3	4	591	28	204	9e-30	129	[S] KOG4325 Uncharacterized conserved protein		KOG
18586_Transcript_3/3_Confidence_0.600_Length_609_45	609	D7TCP5_VITVI	181	64.63	82	27	1	440	195	102	181	3e-28	125		Vitis vinifera (Grape).	TrEMBL
1858_Transcript_2/4_Confidence_0.750_Length_656_45	656	SGN-U577215_PlantCyc_SGN-U313539-MONOMER	305	86.36	88	12	0	655	392	210	297	2e-41	163	PYRUVATE KINASE	Solanum lycopersicum	PlantCyc
18601_Transcript_4/5_Confidence_0.333_Length_997_45	997	SAP15_ORYSJ	174	43.37	166	63	2	312	722	1	164	1e-25	114	Full=Zinc finger AN1 domain-containing stress-associated protein 15;	Oryza sativa subsp. japonica (Rice).	Swiss-Prot
18604_Transcript_1/1_Confidence_1.000_Length_518_45	518	F6HXQ3_VITVI	1257	42.39	184	92	6	517	2	927	1108	6e-25	114		Vitis vinifera (Grape).	TrEMBL
18613_Transcript_1/1_Confidence_1.000_Length_630_45	630	O82179_PlantCyc_MONOMER-907	156	77.86	131	29	0	4	396	26	156	2e-57	216	glycine decarboxylase	Arabidopsis thaliana	PlantCyc
18615_Transcript_1/1_Confidence_1.000_Length_1195_45	1195	NDUV2_ARATH	255	78.54	261	50	1	1115	333	1	255	2e-115	412	Full=NADH dehydrogenase [ubiquinone] flavoprotein 2, mitochondrial;	Arabidopsis thaliana (Mouse-ear cress).	Swiss-Prot
18616_Transcript_2/3_Confidence_0.667_Length_2720_45	2720	At5g23050	668	63.04	487	167	3	2508	1084	1	486	0	635	[I] KOG1175 Acyl-CoA synthetase		KOG
18619_Transcript_1/2_Confidence_1.000_Length_1167_45	1167	At3g25670	475	51.89	370	167	6	52	1140	41	406	2e-81	301	[R] KOG0619 FOG: Leucine rich repeat		KOG
1861_Transcript_1/1_Confidence_1.000_Length_681_45	681	LOC_OS10G43050_PlantCyc_LOC_OS10G43050.1-MONOMER	293	78.02	182	40	0	1	546	112	293	3e-75	275	0	0	PlantCyc
18620_Transcript_1/3_Confidence_0.818_Length_1449_45	1449	P2C11_ORYSJ	362	75	336	83	1	130	1134	1	336	2e-153	539	Full=Probable protein phosphatase 2C 11;	Oryza sativa subsp. japonica (Rice).	Swiss-Prot
18620_Transcript_2/3_Confidence_0.818_Length_1428_45	1428	P2C11_ORYSJ	362	73.21	336	82	2	130	1113	1	336	3e-148	521	Full=Probable protein phosphatase 2C 11;	Oryza sativa subsp. japonica (Rice).	Swiss-Prot
18626_Transcript_1/1_Confidence_1.000_Length_634_45	634	G0Y6T3_ARAHY	562	41.38	87	44	4	389	634	104	188	8e-06	51.6		Arachis hypogaea (Peanut).	TrEMBL
18639_Transcript_1/2_Confidence_1.000_Length_1157_45	1157	CNGC8_ARATH	753	72.64	106	29	0	1157	840	110	215	1e-39	160	Full=Putative cyclic nucleotide-gated ion channel 8;	Arabidopsis thaliana (Mouse-ear cress).	Swiss-Prot
18652_Transcript_1/1_Confidence_1.000_Length_873_45	873	CYT12_ORYSJ	250	64.11	209	74	1	795	172	33	241	3e-73	271	Full=Cysteine proteinase inhibitor 12;	Oryza sativa subsp. japonica (Rice).	Swiss-Prot
18662_Transcript_1/2_Confidence_1.000_Length_857_45	857	G7K3W5_MEDTR	447	67.11	76	25	0	2	229	358	433	6e-24	112		Medicago truncatula (Barrel medic) (Medicago tribuloides).	TrEMBL
18664_Transcript_1/1_Confidence_1.000_Length_295_45	295	MSL5_ARATH	881	70.1	97	29	0	1	291	351	447	3e-34	139	Full=Mechanosensitive ion channel protein 5;	Arabidopsis thaliana (Mouse-ear cress).	Swiss-Prot
18669_Transcript_1/1_Confidence_1.000_Length_498_45	498	MYB08_ANTMA	232	81.06	132	25	0	69	464	1	132	1e-66	248	Full=Myb-related protein 308;	Antirrhinum majus (Garden snapdragon).	Swiss-Prot
18671_Transcript_1/1_Confidence_1.000_Length_298_45	298	Q6L4Q8_ORYSJ	250	48.42	95	48	1	16	297	10	104	2e-09	62		Oryza sativa subsp. japonica (Rice).	TrEMBL
18675_Transcript_1/1_Confidence_1.000_Length_593_45	593	F2EGE7_HORVD	1010	29.84	191	108	7	5	541	798	974	1e-08	60.8		Hordeum vulgare var. distichum (Two-rowed barley).	TrEMBL
1868_Transcript_3/3_Confidence_0.714_Length_2182_45	2182	At2g42810	533	72.79	452	74	1	225	1433	4	455	0	654	[R] KOG0376 Serine-threonine phosphatase 2A, catalytic subunit		KOG
18690_Transcript_1/1_Confidence_1.000_Length_886_45	886	RHF2A_ARATH	375	56.41	117	44	2	151	486	242	356	1e-29	126	Full=E3 ubiquitin-protein ligase RHF2A;	Arabidopsis thaliana (Mouse-ear cress).	Swiss-Prot
1869_Transcript_2/3_Confidence_0.667_Length_1366_45	1366	SGN-U577215_PlantCyc_SGN-U313539-MONOMER	305	50.83	240	96	3	1183	482	7	230	1e-58	222	PYRUVATE KINASE	Solanum lycopersicum	PlantCyc
18718_Transcript_1/1_Confidence_1.000_Length_316_45	316	At5g47730	341	56.94	72	31	0	267	52	257	328	5e-18	87.8	[I] KOG1471 Phosphatidylinositol transfer protein SEC14 and related proteins		KOG
18731_Transcript_1/1_Confidence_1.000_Length_1659_45	1659	CYP40_ARATH	361	74.16	356	92	0	1488	421	5	360	2e-137	486	Full=Peptidyl-prolyl cis-trans isomerase CYP40;	Arabidopsis thaliana (Mouse-ear cress).	Swiss-Prot
18738_Transcript_2/2_Confidence_1.000_Length_778_45	778	A5C725_VITVI	867	64.52	186	65	1	2	559	681	865	9e-54	211		Vitis vinifera (Grape).	TrEMBL
1873_Transcript_3/3_Confidence_0.800_Length_1719_45	1719	Q9LUZ6_PlantCyc_AT5G58600-MONOMER	402	25.86	379	250	11	1424	318	44	401	6e-28	120	UDP glycosyltransferase	Arabidopsis thaliana	PlantCyc
18744_Transcript_1/1_Confidence_1.000_Length_454_45	454	C5XZD2_SORBI	518	43.75	112	55	3	133	453	282	390	2e-18	92.4		Sorghum bicolor (Sorghum) (Sorghum vulgare).	TrEMBL
18745_Transcript_1/1_Confidence_1.000_Length_366_45	366	PSBO_TOBAC	332	90.68	118	11	0	2	355	215	332	8e-59	221	Full=Oxygen-evolving enhancer protein 1, chloroplastic;	Nicotiana tabacum (Common tobacco).	Swiss-Prot
18752_Transcript_4/5_Confidence_0.643_Length_1311_45	1311	COAD_ARATH	176	72.26	155	43	0	466	930	15	169	1e-60	230	Full=Phosphopantetheine adenylyltransferase;	Arabidopsis thaliana (Mouse-ear cress).	Swiss-Prot
18756_Transcript_1/3_Confidence_0.667_Length_890_45	890	NIP51_ARATH	304	85.45	165	24	0	2	496	124	288	1e-70	263	Full=Probable aquaporin NIP5-1;	Arabidopsis thaliana (Mouse-ear cress).	Swiss-Prot
18758_Transcript_1/1_Confidence_1.000_Length_376_45	376	B9RT38_RICCO	112	72.97	111	24	1	62	376	1	111	3e-40	164		Ricinus communis (Castor bean).	TrEMBL
18775_Transcript_1/1_Confidence_1.000_Length_916_45	916	LOC_OS06G34120_PlantCyc_LOC_OS06G34120.1-MONOMER	395	47.88	259	133	2	2	775	135	392	8e-67	248	0	0	PlantCyc
18779_Transcript_1/2_Confidence_1.000_Length_598_45	598	At3g56240	121	85.07	67	10	0	65	265	1	67	3e-27	120	[P] KOG1603 Copper chaperone		KOG
18781_Transcript_1/2_Confidence_1.000_Length_604_45	604	C5YY87_SORBI	631	36.36	121	71	3	239	595	14	130	1e-12	73.9		Sorghum bicolor (Sorghum) (Sorghum vulgare).	TrEMBL
18789_Transcript_1/1_Confidence_1.000_Length_277_45	277	HFC2B_ORYSJ	278	87.65	81	10	0	277	35	21	101	8e-39	154	Full=Heat stress transcription factor C-2b;	Oryza sativa subsp. japonica (Rice).	Swiss-Prot
1878_Transcript_1/1_Confidence_1.000_Length_905_45	905	ARF1_ORYSJ	181	95.58	181	8	0	842	300	1	181	2e-98	355	Full=ADP-ribosylation factor 1;	Oryza sativa subsp. japonica (Rice).	Swiss-Prot
18793_Transcript_1/1_Confidence_1.000_Length_474_45	474	At2g03050	284	56.47	85	37	0	10	264	183	267	7e-20	94.7	[KR] KOG1267 Mitochondrial transcription termination factor, mTERF		KOG
18795_Transcript_1/1_Confidence_1.000_Length_1242_45	1242	At3g19970	431	43.06	281	146	5	118	957	152	419	3e-59	228	[S] KOG2521 Uncharacterized conserved protein		KOG
18797_Transcript_3/3_Confidence_0.714_Length_1617_45	1617	At2g26900	338	82.55	321	41	2	234	1196	19	324	1e-128	458	[P] KOG2718 Na+-bile acid cotransporter		KOG
18798_Transcript_1/1_Confidence_1.000_Length_266_45	266	A9PBL1_POPTR	255	51.25	80	27	2	242	3	8	75	1e-14	79.7		Populus trichocarpa (Western balsam poplar) (Populus balsamifera subsp. trichocarpa).	TrEMBL
18801_Transcript_2/3_Confidence_0.667_Length_3319_45	3319	GCSP_SOLTU	1035	84.06	1035	150	2	113	3196	1	1027	0	1708	Full=Glycine dehydrogenase [decarboxylating], mitochondrial;	Solanum tuberosum (Potato).	Swiss-Prot
18802_Transcript_2/3_Confidence_0.750_Length_732_45	732	Q109L5_ORYSJ	5157	38.37	86	51	2	670	419	3273	3358	4e-07	56.2	Full=Midasin;	Oryza sativa subsp. japonica (Rice).	TrEMBL
18808_Transcript_6/6_Confidence_0.524_Length_924_45	924	UMP1_ARATH	395	38.73	204	88	11	90	677	165	339	2e-22	103	Full=Uncharacterized protein At3g15000, mitochondrial;	Arabidopsis thaliana (Mouse-ear cress).	Swiss-Prot
18816_Transcript_1/1_Confidence_1.000_Length_444_45	444	Q84TB2_ORYSJ	617	50.96	104	51	0	132	443	463	566	9e-25	113		Oryza sativa subsp. japonica (Rice).	TrEMBL
18822_Transcript_1/3_Confidence_0.667_Length_650_45	650	A9PI30_POPTR	122	44.26	122	58	3	1	360	8	121	6e-20	98.6		Populus trichocarpa (Western balsam poplar) (Populus balsamifera subsp. trichocarpa).	TrEMBL
18823_Transcript_1/1_Confidence_1.000_Length_207_45	207	LCAT1_ARATH	432	50.94	53	24	1	206	48	371	421	4e-09	56.2	Full=Lecithin-cholesterol acyltransferase-like 1;	Arabidopsis thaliana (Mouse-ear cress).	Swiss-Prot
18827_Transcript_1/2_Confidence_1.000_Length_1411_45	1411	Q6ATE2_ORYSJ	382	51.88	320	141	5	1193	246	46	356	3e-77	290		Oryza sativa subsp. japonica (Rice).	TrEMBL
18829_Transcript_1/1_Confidence_1.000_Length_613_45	613	FPP7_ARATH	898	51.18	211	91	3	1	603	191	399	7e-53	203	Full=Filament-like plant protein 7;	Arabidopsis thaliana (Mouse-ear cress).	Swiss-Prot
1882_Transcript_1/1_Confidence_1.000_Length_950_45	950	At1g74120	445	52.24	201	94	1	28	624	245	445	1e-56	218	[KR] KOG1267 Mitochondrial transcription termination factor, mTERF		KOG
18830_Transcript_1/1_Confidence_1.000_Length_851_45	851	C5Z4K2_SORBI	267	39.43	246	104	5	776	174	9	254	1e-36	154		Sorghum bicolor (Sorghum) (Sorghum vulgare).	TrEMBL
18851_Transcript_2/2_Confidence_1.000_Length_914_45	914	UBC10_ARATH	148	97.53	81	2	0	658	416	68	148	3e-42	169	Full=Ubiquitin-conjugating enzyme E2 10;	Arabidopsis thaliana (Mouse-ear cress).	Swiss-Prot
18856_Transcript_2/2_Confidence_1.000_Length_650_45	650	B9RG28_RICCO	170	32.74	168	91	5	130	567	1	168	5e-20	99		Ricinus communis (Castor bean).	TrEMBL
18859_Transcript_1/1_Confidence_1.000_Length_770_45	770	At5g55290	70	72.06	68	19	0	684	481	3	70	7e-26	115	[C] KOG3500 Vacuolar H+-ATPase V0 sector, subunit M9.7 (M9.2)		KOG
1885_Transcript_1/1_Confidence_1.000_Length_694_45	694	RR20_ARATH	202	68.07	119	36	1	463	113	73	191	4e-34	141	Full=30S ribosomal protein S20, chloroplastic;	Arabidopsis thaliana (Mouse-ear cress).	Swiss-Prot
18861_Transcript_1/3_Confidence_0.429_Length_1650_45	1650	SAPK7_ORYSJ	359	89.24	316	34	0	1313	366	1	316	2e-170	595	Full=Serine/threonine-protein kinase SAPK7;	Oryza sativa subsp. japonica (Rice).	Swiss-Prot
18861_Transcript_2/3_Confidence_0.571_Length_1409_45	1409	SAPK7_ORYSJ	359	86.76	136	18	0	773	366	181	316	2e-67	253	Full=Serine/threonine-protein kinase SAPK7;	Oryza sativa subsp. japonica (Rice).	Swiss-Prot
18864_Transcript_2/2_Confidence_1.000_Length_538_45	538	At3g14450	327	50.88	57	28	0	145	315	112	168	5e-11	65.9	[R] KOG0118 FOG: RRM domain		KOG
18867_Transcript_1/1_Confidence_1.000_Length_528_45	528	LOC_OS10G35020_PlantCyc_LOC_OS10G35020.1-MONOMER	500	53.9	141	64	1	527	108	352	492	4e-39	155	0	0	PlantCyc
18876_Transcript_1/1_Confidence_1.000_Length_673_45	673	KRP4_ORYSJ	194	54.9	102	43	2	51	350	94	194	3e-24	108	Full=Cyclin-dependent kinase inhibitor 4;	Oryza sativa subsp. japonica (Rice).	Swiss-Prot
18879_Transcript_1/1_Confidence_1.000_Length_1709_45	1709	LOC_OS04G39270_PlantCyc_LOC_OS04G39270.1-MONOMER	419	77	313	72	0	1177	239	102	414	9e-143	501	0	0	PlantCyc
18880_Transcript_1/1_Confidence_1.000_Length_1397_45	1397	UBP3_ARATH	371	83.11	367	58	3	55	1143	1	367	4e-178	620	Full=Ubiquitin carboxyl-terminal hydrolase 3;	Arabidopsis thaliana (Mouse-ear cress).	Swiss-Prot
18884_Transcript_1/1_Confidence_1.000_Length_728_45	728	At5g42890	123	73.33	120	31	1	582	226	4	123	4e-45	179	[I] KOG4170 2-enoyl-CoA hydratase/3-hydroxyacyl-CoA dehydrogenase/Peroxisomal 3-ketoacyl-CoA-thiolase, sterol-binding domain and related enzymes		KOG
1888_Transcript_2/7_Confidence_0.500_Length_1275_45	1275	At2g37540	321	64.26	319	113	1	79	1035	1	318	3e-99	360	[Q] KOG1208 Dehydrogenases with different specificities (related to short-chain alcohol dehydrogenases)		KOG
18897_Transcript_1/2_Confidence_1.000_Length_686_45	686	ACO2M_ARATH	990	83.33	18	3	0	629	576	553	570	2e-10	37.7	Full=Aconitate hydratase 2, mitochondrial;	Arabidopsis thaliana (Mouse-ear cress).	Swiss-Prot
18898_Transcript_1/4_Confidence_0.700_Length_495_45	495	At1g77180	613	66.67	111	34	2	459	133	500	609	1e-40	154	[AB] KOG2441 mRNA splicing factor/probable chromatin binding snw family nuclear protein		KOG
18927_Transcript_1/2_Confidence_1.000_Length_588_45	588	LOC_OS04G24140_PlantCyc_LOC_OS04G24140.1-MONOMER	275	52.59	116	48	1	575	228	166	274	1e-28	120	0	0	PlantCyc
1893_Transcript_1/2_Confidence_1.000_Length_884_45	884	SGN-U580044_PlantCyc_SGN-U313455-MONOMER	150	28.07	114	79	1	143	475	1	114	1e-11	65.5	2-ISOPROPYLMALATE SYNTHASE	Solanum lycopersicum	PlantCyc
1893_Transcript_2/2_Confidence_1.000_Length_925_45	925	SGN-U580044_PlantCyc_SGN-U313455-MONOMER	150	28.07	114	79	1	143	475	1	114	1e-11	65.5	2-ISOPROPYLMALATE SYNTHASE	Solanum lycopersicum	PlantCyc
18954_Transcript_1/1_Confidence_1.000_Length_1508_45	1508	At5g19150	382	61.97	355	115	5	178	1233	21	358	2e-111	401	[G] KOG3974 Predicted sugar kinase		KOG
18955_Transcript_1/1_Confidence_1.000_Length_542_45	542	At4g12290	756	50.85	177	84	2	537	13	151	326	5e-44	175	[Q] KOG1186 Copper amine oxidase		KOG
18961_Transcript_1/1_Confidence_1.000_Length_1548_45	1548	BGL44_ARATH	512	74.51	455	112	1	1501	149	57	511	0	758	Full=Beta-glucosidase 44;	Arabidopsis thaliana (Mouse-ear cress).	Swiss-Prot
1896_Transcript_12/13_Confidence_0.289_Length_2590_45	2590	VIP2_NICBE	603	64.74	570	180	12	1863	178	45	601	8e-163	571	Full=Probable NOT transcription complex subunit VIP2;	Nicotiana benthamiana.	Swiss-Prot
18970_Transcript_1/2_Confidence_1.000_Length_774_45	774	At5g64090	448	43.29	164	63	5	774	319	279	424	8e-25	112	[T] KOG4688 Putative beta-catenin-Tcf/Lef signaling pathway component DRCTNNB1A		KOG
18979_Transcript_1/1_Confidence_1.000_Length_227_45	227	At3g56240	121	77.78	72	16	0	4	219	1	72	4e-27	117	[P] KOG1603 Copper chaperone		KOG
18986_Transcript_2/2_Confidence_1.000_Length_388_45	388	C86B1_ARATH	559	47.5	40	21	0	387	268	504	543	6e-07	49.3	Full=Cytochrome P450 86B1;	Arabidopsis thaliana (Mouse-ear cress).	Swiss-Prot
18989_Transcript_2/2_Confidence_1.000_Length_3238_45	3238	At5g62600	572	63.04	552	197	3	84	1724	1	550	0	666	[U] KOG2081 Nuclear transport regulator		KOG
18994_Transcript_1/1_Confidence_1.000_Length_1213_45	1213	ROGF1_ARATH	548	55.24	315	131	4	1168	233	241	548	1e-83	306	Full=Rop guanine nucleotide exchange factor 1;	Arabidopsis thaliana (Mouse-ear cress).	Swiss-Prot
18_Transcript_5/6_Confidence_0.455_Length_3745_45	3745	At3g13460	608	45.44	614	263	20	1508	3274	41	607	3e-124	445	[R] KOG1901 Uncharacterized high-glucose-regulated protein		KOG
19004_Transcript_1/4_Confidence_0.500_Length_340_45	340	At5g11680	207	81.08	74	12	1	216	1	1	74	6e-29	124	[T] KOG3294 WW domain binding protein WBP-2, contains GRAM domain		KOG
19012_Transcript_1/2_Confidence_1.000_Length_1040_45	1040	At3g02220	227	60	170	67	1	968	462	7	176	2e-58	224	[S] KOG3241 Uncharacterized conserved protein		KOG
1901_Transcript_1/1_Confidence_1.000_Length_955_45	955	FRI3_SOYBN	256	83.25	203	34	0	834	226	54	256	4e-89	324	Full=Ferritin-3, chloroplastic;	Glycine max (Soybean) (Glycine hispida).	Swiss-Prot
19022_Transcript_1/1_Confidence_1.000_Length_252_45	252	SUBL_ARATH	757	34.67	75	47	1	27	251	23	95	3e-06	46.6	Full=Subtilisin-like protease;	Arabidopsis thaliana (Mouse-ear cress).	Swiss-Prot
19031_Transcript_1/2_Confidence_1.000_Length_1219_45	1219	DRB1_ORYSJ	441	46.67	150	70	2	100	519	83	232	1e-29	127	Full=Double-stranded RNA-binding protein 1;	Oryza sativa subsp. japonica (Rice).	Swiss-Prot
19048_Transcript_2/3_Confidence_0.714_Length_2385_45	2385	At1g62750	783	87.08	712	92	0	2360	225	72	783	0	1270	[J] KOG0465 Mitochondrial elongation factor		KOG
19054_Transcript_2/4_Confidence_0.700_Length_901_45	901	ERF1_ORYSJ	365	33.18	223	134	7	1	639	144	361	1e-11	67.4	Full=Ethylene-responsive transcription factor 1;	Oryza sativa subsp. japonica (Rice).	Swiss-Prot
19058_Transcript_1/1_Confidence_1.000_Length_1981_45	1981	ATX2_ARATH	1083	32.65	389	206	13	846	1901	690	1059	9e-47	185	Full=Histone-lysine N-methyltransferase ATX2;	Arabidopsis thaliana (Mouse-ear cress).	Swiss-Prot
19060_Transcript_3/3_Confidence_0.750_Length_653_45	653	GOGC2_ARATH	668	28.8	125	72	2	251	610	333	445	8e-09	57	Full=Golgin candidate 2;	Arabidopsis thaliana (Mouse-ear cress).	Swiss-Prot
1907_Transcript_3/7_Confidence_0.625_Length_3561_45	3561	FPP1_ARATH	779	34.3	796	407	25	2899	632	5	724	3e-90	330	Full=Filament-like plant protein 1;	Arabidopsis thaliana (Mouse-ear cress).	Swiss-Prot
19087_Transcript_1/1_Confidence_1.000_Length_994_45	994	At5g19370	309	49.68	308	110	6	113	922	9	309	1e-73	275	[H] KOG2017 Molybdopterin synthase sulfurylase		KOG
19097_Transcript_1/2_Confidence_1.000_Length_441_45	441	RS14_CHLRE	153	97.06	68	2	0	2	205	75	142	6e-23	102	Full=40S ribosomal protein S14;	Chlamydomonas reinhardtii (Chlamydomonas smithii).	Swiss-Prot
19120_Transcript_1/1_Confidence_1.000_Length_1362_45	1362	LOC_OS01G65260_PlantCyc_LOC_OS01G65260.1-MONOMER	551	73.9	387	99	2	1362	202	158	542	3e-164	572	0	0	PlantCyc
19129_Transcript_1/1_Confidence_1.000_Length_348_45	348	Q1EP46_MUSBA	565	46.73	107	51	3	40	342	355	461	4e-16	84.3		Musa balbisiana (Banana).	TrEMBL
19133_Transcript_1/1_Confidence_1.000_Length_631_45	631	SPA1_ARATH	1029	33.49	218	129	4	631	2	503	712	5e-29	124	Full=Protein SUPPRESSOR OF PHYA-105 1;	Arabidopsis thaliana (Mouse-ear cress).	Swiss-Prot
19146_Transcript_1/1_Confidence_1.000_Length_484_45	484	A5CBE5_VITVI	252	72.73	77	19	1	233	3	50	124	2e-25	115		Vitis vinifera (Grape).	TrEMBL
19156_Transcript_1/1_Confidence_1.000_Length_883_45	883	At2g15580	204	40.98	205	85	7	198	710	1	203	7e-31	132	[O] KOG0800 FOG: Predicted E3 ubiquitin ligase		KOG
19166_Transcript_1/1_Confidence_1.000_Length_263_45	263	LOC_OS05G11080_PlantCyc_LOC_OS05G11080.1-MONOMER	1439	35.21	71	43	2	213	1	430	497	5e-06	43.9	0	0	PlantCyc
1917_Transcript_2/7_Confidence_0.588_Length_2012_45	2012	CID2_ARATH	143	46.25	80	38	2	648	415	10	86	3e-14	76.3	Full=Polyadenylate-binding protein-interacting protein 2;	Arabidopsis thaliana (Mouse-ear cress).	Swiss-Prot
19185_Transcript_1/3_Confidence_0.833_Length_1225_45	1225	E0CRU0_VITVI	240	65.04	226	72	3	1067	393	21	240	5e-70	266		Vitis vinifera (Grape).	TrEMBL
19210_Transcript_1/1_Confidence_1.000_Length_1071_45	1071	Q5JMS6_ORYSJ	294	70.73	287	82	1	45	899	7	293	2e-105	384		Oryza sativa subsp. japonica (Rice).	TrEMBL
19222_Transcript_1/5_Confidence_0.167_Length_273_45	273	RENT1_ARATH	1254	77.78	72	15	1	59	271	113	184	9e-33	134	Full=Regulator of nonsense transcripts 1 homolog;	Arabidopsis thaliana (Mouse-ear cress).	Swiss-Prot
19224_Transcript_1/1_Confidence_1.000_Length_1839_45	1839	HIS5_ARATH	592	81.39	548	98	2	200	1834	45	591	0	902	Full=Imidazole glycerol phosphate synthase hisHF, chloroplastic;	Arabidopsis thaliana (Mouse-ear cress).	Swiss-Prot
19225_Transcript_1/1_Confidence_1.000_Length_515_45	515	LPP2_ARATH	290	60.71	112	38	1	2	337	184	289	5e-23	103	Full=Lipid phosphate phosphatase 2;	Arabidopsis thaliana (Mouse-ear cress).	Swiss-Prot
1922_Transcript_1/2_Confidence_1.000_Length_1813_45	1813	LOC_OS04G39210_PlantCyc_LOC_OS04G39210.1-MONOMER	380	69.58	309	91	3	1039	116	70	376	9e-128	452	0	0	PlantCyc
19234_Transcript_2/4_Confidence_0.625_Length_807_45	807	At3g59920	444	46.91	162	52	3	653	270	283	444	2e-27	121	[O] KOG1439 RAB proteins geranylgeranyltransferase component A (RAB escort protein)		KOG
19237_Transcript_1/1_Confidence_1.000_Length_552_45	552	LOG1_ARATH	213	79.41	102	21	0	552	247	112	213	3e-42	167	Full=Cytokinin riboside 5'-monophosphate phosphoribohydrolase LOG1;	Arabidopsis thaliana (Mouse-ear cress).	Swiss-Prot
1923_Transcript_2/3_Confidence_0.625_Length_2249_45	2249	At4g35870	817	58.57	519	209	5	7	1554	92	607	7e-160	563	[R] KOG1134 Uncharacterized conserved protein		KOG
19246_Transcript_1/1_Confidence_1.000_Length_1772_45	1772	At5g53060	660	49.8	488	232	5	6	1469	174	648	6e-119	426	[AR] KOG2190 PolyC-binding proteins alphaCP-1 and related KH domain proteins		KOG
19258_Transcript_2/4_Confidence_0.429_Length_635_45	635	ZFNL_PEA	417	63.44	93	32	2	378	100	326	416	2e-26	115	Full=Zinc finger CCCH domain-containing protein ZFN-like;	Pisum sativum (Garden pea).	Swiss-Prot
19268_Transcript_1/1_Confidence_1.000_Length_1580_45	1580	G0XZC9_MALDO	212	62.71	59	22	0	1036	1212	58	116	2e-27	77		Malus domestica (Apple) (Pyrus malus).	TrEMBL
19272_Transcript_1/1_Confidence_1.000_Length_570_45	570	Hs7706499	108	48.6	107	52	2	546	229	4	108	5e-25	112	[K] KOG2906 RNA polymerase III subunit C11		KOG
1928_Transcript_1/2_Confidence_1.000_Length_3165_45	3165	CGEP_ORYSJ	938	81.91	857	149	3	8	2578	85	935	0	1452	Full=Probable glutamyl endopeptidase, chloroplastic;	Oryza sativa subsp. japonica (Rice).	Swiss-Prot
19298_Transcript_1/1_Confidence_1.000_Length_1835_45	1835	PTR15_ARATH	601	68.95	570	156	6	1770	70	16	567	0	678	Full=Probable peptide/nitrate transporter At1g33440;	Arabidopsis thaliana (Mouse-ear cress).	Swiss-Prot
192_Transcript_2/3_Confidence_0.667_Length_2595_45	2595	U2A2B_NICPL	573	83.38	379	63	0	1240	2376	195	573	1e-178	623	Full=Splicing factor U2af large subunit B;	Nicotiana plumbaginifolia (Leadwort-leaved tobacco) (Tex-Mex tobacco).	Swiss-Prot
1930_Transcript_7/15_Confidence_0.381_Length_2609_45	2609	DPE1_ORYSJ	594	75.93	54	13	0	2445	2606	358	411	2e-19	94.7	Full=4-alpha-glucanotransferase DPE1, chloroplastic/amyloplastic;	Oryza sativa subsp. japonica (Rice).	Swiss-Prot
19318_Transcript_3/4_Confidence_0.667_Length_1022_45	1022	At4g37360	499	63.21	106	37	1	1022	705	386	489	6e-35	146	[Q] KOG0156 Cytochrome P450 CYP2 subfamily		KOG
19326_Transcript_1/2_Confidence_1.000_Length_1575_45	1575	C0P768_MAIZE	499	37.34	241	130	9	218	916	55	282	8e-22	106		Zea mays (Maize).	TrEMBL
19329_Transcript_1/1_Confidence_1.000_Length_794_45	794	Q84T97_ORYSJ	355	43.67	158	63	8	738	319	156	305	9e-20	98.6		Oryza sativa subsp. japonica (Rice).	TrEMBL
19336_Transcript_1/1_Confidence_1.000_Length_633_45	633	Q10M62_ORYSJ	876	51.18	170	82	1	510	1	286	454	8e-41	167		Oryza sativa subsp. japonica (Rice).	TrEMBL
19338_Transcript_6/8_Confidence_0.556_Length_1433_45	1433	G7LEL2_MEDTR	364	38.49	304	176	5	1051	149	61	356	2e-50	201		Medicago truncatula (Barrel medic) (Medicago tribuloides).	TrEMBL
19341_Transcript_1/1_Confidence_1.000_Length_272_45	272	At1g21480	440	74.51	51	13	0	2	154	390	440	2e-18	89	[GMW] KOG1021 Acetylglucosaminyltransferase EXT1/exostosin 1		KOG
1940_Transcript_4/4_Confidence_0.800_Length_1328_45	1328	POLX_TOBAC	1328	28.46	130	82	5	572	189	421	541	3e-10	49.7	Full=Retrovirus-related Pol polyprotein from transposon TNT 1-94;	Nicotiana tabacum (Common tobacco).	Swiss-Prot
19412_Transcript_1/2_Confidence_1.000_Length_3094_45	3094	At3g06670	863	54.77	776	302	8	264	2558	25	762	0	766	[G] KOG2175 Protein predicted to be involved in carbohydrate metabolism		KOG
19419_Transcript_1/1_Confidence_1.000_Length_560_45	560	C5XCF1_SORBI	188	62.5	120	42	2	199	558	38	154	2e-35	149		Sorghum bicolor (Sorghum) (Sorghum vulgare).	TrEMBL
19424_Transcript_1/2_Confidence_1.000_Length_831_45	831	Q9LUZ6_PlantCyc_AT5G58600-MONOMER	402	33.86	127	68	6	622	275	280	401	2e-09	57.8	UDP glycosyltransferase	Arabidopsis thaliana	PlantCyc
1942_Transcript_1/1_Confidence_1.000_Length_1852_45	1852	ASPRX_ORYSJ	496	65.39	497	160	3	131	1621	12	496	0	688	Full=Aspartic proteinase;	Oryza sativa subsp. japonica (Rice).	Swiss-Prot
19433_Transcript_1/1_Confidence_1.000_Length_596_45	596	AB13C_ARATH	1410	65.55	119	41	0	359	3	386	504	2e-39	158	Full=ABC transporter C family member 13;	Arabidopsis thaliana (Mouse-ear cress).	Swiss-Prot
19439_Transcript_1/1_Confidence_1.000_Length_556_45	556	D7T4R6_VITVI	545	54.6	174	62	3	507	37	1	174	3e-41	169		Vitis vinifera (Grape).	TrEMBL
19452_Transcript_1/1_Confidence_1.000_Length_510_45	510	PP2A_MEDSA	313	92.68	41	3	0	510	388	273	313	5e-18	87	Full=Serine/threonine-protein phosphatase PP2A catalytic subunit;	Medicago sativa (Alfalfa).	Swiss-Prot
19457_Transcript_2/3_Confidence_0.818_Length_1647_45	1647	F6HL14_VITVI	409	36.73	452	198	19	176	1396	1	409	2e-47	191		Vitis vinifera (Grape).	TrEMBL
1945_Transcript_1/1_Confidence_1.000_Length_835_45	835	SUI1_ORYSJ	115	90.43	115	9	1	257	595	1	115	4e-55	211	Full=Protein translation factor SUI1 homolog;	Oryza sativa subsp. japonica (Rice).	Swiss-Prot
19464_Transcript_1/1_Confidence_1.000_Length_350_45	350	At3g14180	443	67.33	101	31	1	317	15	80	178	1e-28	123	[K] KOG4282 Transcription factor GT-2 and related proteins, contains trihelix DNA-binding/SANT domain		KOG
19469_Transcript_2/3_Confidence_0.714_Length_2020_45	2020	OCS1_MAIZE	151	36.51	126	78	2	682	308	27	151	6e-14	76.3	Full=Ocs element-binding factor 1;	Zea mays (Maize).	Swiss-Prot
19476_Transcript_1/1_Confidence_1.000_Length_563_45	563	A5C676_VITVI	133	43.53	85	45	2	170	418	32	115	2e-11	69.7		Vitis vinifera (Grape).	TrEMBL
19479_Transcript_2/2_Confidence_1.000_Length_1691_45	1691	At4g34340	353	39.9	381	188	10	1315	206	3	353	1e-56	219	[K] KOG2389 Predicted bromodomain transcription factor		KOG
19485_Transcript_1/1_Confidence_1.000_Length_517_45	517	LOC_OS11G31640_PlantCyc_LOC_OS11G31640.1-MONOMER	488	83.04	171	29	0	515	3	174	344	4e-81	294	0	0	PlantCyc
19488_Transcript_1/1_Confidence_1.000_Length_238_45	238	PATL6_ARATH	409	76.92	78	18	0	1	234	250	327	5e-31	129	Full=Patellin-6;	Arabidopsis thaliana (Mouse-ear cress).	Swiss-Prot
19489_Transcript_1/1_Confidence_1.000_Length_4132_45	4132	At3g62360	1227	56.45	1210	482	9	204	3728	26	1225	0	1343	[O] KOG1948 Metalloproteinase-related collagenase pM5		KOG
1948_Transcript_8/10_Confidence_0.280_Length_964_45	964	DXS_ORYSJ	720	67.57	37	12	0	616	726	444	480	1e-09	60.8	Full=Probable 1-deoxy-D-xylulose-5-phosphate synthase, chloroplastic;	Oryza sativa subsp. japonica (Rice).	Swiss-Prot
19512_Transcript_1/1_Confidence_1.000_Length_453_45	453	Q0D862_ORYSJ	77	65.31	49	16	1	412	269	1	49	1e-09	63.2		Oryza sativa subsp. japonica (Rice).	TrEMBL
19534_Transcript_1/1_Confidence_1.000_Length_1141_45	1141	CYSK1_ORYSJ	321	85.94	320	45	0	25	984	2	321	5e-145	510	Full=Cysteine synthase;	Oryza sativa subsp. japonica (Rice).	Swiss-Prot
19540_Transcript_2/3_Confidence_0.714_Length_1557_45	1557	B9IG28_POPTR	355	34.49	316	179	8	357	1235	44	354	1e-32	142		Populus trichocarpa (Western balsam poplar) (Populus balsamifera subsp. trichocarpa).	TrEMBL
19562_Transcript_1/2_Confidence_1.000_Length_1997_45	1997	At5g11980	619	64.36	592	153	5	1861	251	17	605	0	697	[U] KOG2069 Golgi transport complex subunit		KOG
19570_Transcript_1/1_Confidence_1.000_Length_411_45	411	PSKR1_DAUCA	1021	66.02	103	35	0	3	311	915	1017	3e-37	150	Full=Phytosulfokine receptor 1;	Daucus carota (Carrot).	Swiss-Prot
19594_Transcript_1/4_Confidence_0.727_Length_646_45	646	C5WTB0_SORBI	150	48.19	166	53	2	123	617	13	146	1e-30	134		Sorghum bicolor (Sorghum) (Sorghum vulgare).	TrEMBL
19594_Transcript_2/4_Confidence_0.545_Length_640_45	640	B9S9T7_RICCO	129	65.32	124	41	2	243	611	3	125	4e-31	135		Ricinus communis (Castor bean).	TrEMBL
1960_Transcript_1/2_Confidence_1.000_Length_1410_45	1410	PER21_ARATH	327	68.33	300	94	1	284	1180	26	325	2e-119	426	Full=Peroxidase 21;	Arabidopsis thaliana (Mouse-ear cress).	Swiss-Prot
19615_Transcript_1/1_Confidence_1.000_Length_3247_45	3247	R13L1_ARATH	1054	37.84	1020	575	24	56	2977	4	1010	2e-177	619	Full=Putative disease resistance RPP13-like protein 1;	Arabidopsis thaliana (Mouse-ear cress).	Swiss-Prot
19620_Transcript_1/1_Confidence_1.000_Length_474_45	474	NUD17_ARATH	182	53.57	140	59	3	5	412	25	162	3e-28	120	Full=Nudix hydrolase 17, mitochondrial;	Arabidopsis thaliana (Mouse-ear cress).	Swiss-Prot
19621_Transcript_1/1_Confidence_1.000_Length_792_45	792	LOC_OS05G30750_PlantCyc_LOC_OS05G30750.1-MONOMER	774	64.68	252	86	3	39	791	23	272	1e-86	314	0	0	PlantCyc
19646_Transcript_1/2_Confidence_1.000_Length_474_45	474	At1g61780	98	86.42	81	9	1	131	367	18	98	4e-38	155	[Z] KOG3476 Microtubule-associated protein CRIPT		KOG
19666_Transcript_2/4_Confidence_0.600_Length_1066_45	1066	FD_ARATH	285	33.93	168	72	4	1006	515	153	285	5e-10	62	Full=Protein FD;	Arabidopsis thaliana (Mouse-ear cress).	Swiss-Prot
19668_Transcript_2/4_Confidence_0.625_Length_1140_45	1140	ICMTA_ARATH	197	62.39	109	41	0	575	249	17	125	3e-37	152	Full=Protein-S-isoprenylcysteine O-methyltransferase A;	Arabidopsis thaliana (Mouse-ear cress).	Swiss-Prot
19669_Transcript_1/1_Confidence_1.000_Length_221_45	221	At1g10160	1118	48.53	68	35	0	6	209	462	529	2e-14	75.5	[R] KOG1075 FOG: Reverse transcriptase		KOG
19676_Transcript_1/1_Confidence_1.000_Length_572_45	572	CKX5_ARATH	540	65	80	27	1	1	240	435	513	7e-25	110	Full=Cytokinin dehydrogenase 5;	Arabidopsis thaliana (Mouse-ear cress).	Swiss-Prot
19686_Transcript_1/1_Confidence_1.000_Length_609_45	609	UBQ4_ARATH	382	100	57	0	0	439	609	1	57	9e-26	113	Full=Polyubiquitin 4;	Arabidopsis thaliana (Mouse-ear cress).	Swiss-Prot
1968_Transcript_1/3_Confidence_0.875_Length_2338_45	2338	CAPP_SOLTU	965	87.37	744	79	1	1	2187	222	965	0	1277	Full=Phosphoenolpyruvate carboxylase;	Solanum tuberosum (Potato).	Swiss-Prot
19691_Transcript_1/1_Confidence_1.000_Length_504_45	504	Q6JJ62_IPOTF	395	34.38	96	57	2	222	491	66	161	4e-08	58.5		Ipomoea trifida (Morning glory).	TrEMBL
19693_Transcript_1/1_Confidence_1.000_Length_407_45	407	SGN-U582988_PlantCyc_SGN-U317504-MONOMER	441	40.16	122	64	4	357	1	2	117	3e-08	52	DTDP-GLUCOSE 4-6-DEHYDRATASE	Solanum lycopersicum	PlantCyc
19696_Transcript_1/1_Confidence_1.000_Length_496_45	496	At2g29540	122	60.22	93	37	0	66	344	1	93	2e-23	107	[K] KOG3438 DNA-directed RNA polymerase, subunit L		KOG
19702_Transcript_2/3_Confidence_0.667_Length_1741_45	1741	TC159_ARATH	1503	19.69	457	297	19	1217	3	368	806	1e-16	85.1	Full=Translocase of chloroplast 159, chloroplastic;	Arabidopsis thaliana (Mouse-ear cress).	Swiss-Prot
19702_Transcript_3/3_Confidence_0.667_Length_1804_45	1804	TC159_ARATH	1503	29.23	455	258	19	1220	3	367	806	1e-16	84.7	Full=Translocase of chloroplast 159, chloroplastic;	Arabidopsis thaliana (Mouse-ear cress).	Swiss-Prot
19716_Transcript_1/1_Confidence_1.000_Length_771_45	771	DOF22_ARATH	340	51.06	47	23	0	770	630	127	173	2e-07	53.1	Full=Dof zinc finger protein DOF2.2;	Arabidopsis thaliana (Mouse-ear cress).	Swiss-Prot
19728_Transcript_1/1_Confidence_1.000_Length_259_45	259	NIK1_ARATH	638	77.63	76	17	0	32	259	32	107	6e-31	128	Full=Protein NSP-INTERACTING KINASE 1;	Arabidopsis thaliana (Mouse-ear cress).	Swiss-Prot
1972_Transcript_2/3_Confidence_0.600_Length_824_45	824	MTND2_ORYSJ	198	87.7	187	23	0	20	580	1	187	1e-99	359	Full=1,2-dihydroxy-3-keto-5-methylthiopentene dioxygenase 2;	Oryza sativa subsp. japonica (Rice).	Swiss-Prot
19733_Transcript_1/1_Confidence_1.000_Length_1687_45	1687	At5g62310	1168	68.24	529	149	7	42	1601	642	1160	0	678	[TR] KOG0606 Microtubule-associated serine/threonine kinase and related proteins		KOG
19740_Transcript_1/1_Confidence_1.000_Length_705_45	705	GPX1_ARATH	236	87.84	148	18	0	705	262	89	236	3e-74	274	Full=Phospholipid hydroperoxide glutathione peroxidase 1, chloroplastic;	Arabidopsis thaliana (Mouse-ear cress).	Swiss-Prot
19747_Transcript_1/1_Confidence_1.000_Length_1864_45	1864	GLR34_ARATH	959	59.07	535	214	4	3	1595	407	940	4e-173	604	Full=Glutamate receptor 3.4;	Arabidopsis thaliana (Mouse-ear cress).	Swiss-Prot
19751_Transcript_1/1_Confidence_1.000_Length_481_45	481	ATG8I_ARATH	115	73.91	115	30	0	33	377	1	115	1e-48	188	Full=Autophagy-related protein 8i;	Arabidopsis thaliana (Mouse-ear cress).	Swiss-Prot
19757_Transcript_1/1_Confidence_1.000_Length_231_45	231	UPTG2_SOLTU	366	97.62	42	1	0	105	230	9	50	1e-19	91.3	Full=Alpha-1,4-glucan-protein synthase [UDP-forming] 2;	Solanum tuberosum (Potato).	Swiss-Prot
19763_Transcript_1/1_Confidence_1.000_Length_684_45	684	NAT1_ARATH	520	80.18	227	45	0	682	2	223	449	4e-96	347	Full=Nucleobase-ascorbate transporter 1;	Arabidopsis thaliana (Mouse-ear cress).	Swiss-Prot
19778_Transcript_1/1_Confidence_1.000_Length_415_45	415	CALS8_ARATH	1976	63.91	133	39	1	413	42	1110	1242	1e-45	177	Full=Putative callose synthase 8;	Arabidopsis thaliana (Mouse-ear cress).	Swiss-Prot
1977_Transcript_1/1_Confidence_1.000_Length_495_45	495	RCI2B_ARATH	54	79.49	39	8	0	440	324	1	39	6e-07	50.1	Full=Hydrophobic protein RCI2B;	Arabidopsis thaliana (Mouse-ear cress).	Swiss-Prot
19784_Transcript_1/1_Confidence_1.000_Length_941_45	941	NAC68_ORYSJ	318	60.97	269	76	4	37	765	12	277	4e-86	314	Full=NAC domain-containing protein 68;	Oryza sativa subsp. japonica (Rice).	Swiss-Prot
19789_Transcript_1/2_Confidence_1.000_Length_358_45	358	RIN4_ARATH	211	56.76	37	13	1	358	257	154	190	2e-06	47.4	Full=RPM1-interacting protein 4;	Arabidopsis thaliana (Mouse-ear cress).	Swiss-Prot
19810_Transcript_1/1_Confidence_1.000_Length_1440_45	1440	At4g14600	590	56.77	421	152	7	1434	211	175	578	4e-131	466	[KR] KOG1267 Mitochondrial transcription termination factor, mTERF		KOG
19814_Transcript_1/2_Confidence_1.000_Length_348_45	348	MYST1_ORYSJ	450	86.41	103	11	2	302	3	56	158	5e-46	178	Full=Putative MYST-like histone acetyltransferase 1;	Oryza sativa subsp. japonica (Rice).	Swiss-Prot
1981_Transcript_1/4_Confidence_0.667_Length_1235_45	1235	SKI24_ARATH	295	44.74	190	100	2	2	556	27	216	1e-33	140	Full=F-box protein SKIP24;	Arabidopsis thaliana (Mouse-ear cress).	Swiss-Prot
19820_Transcript_1/1_Confidence_1.000_Length_460_45	460	CYPH_ALLCE	150	87.72	57	7	0	460	290	94	150	8e-24	105	Full=Peptidyl-prolyl cis-trans isomerase;	Allium cepa (Onion).	Swiss-Prot
19825_Transcript_1/1_Confidence_1.000_Length_269_45	269	SPBC651.08c	1405	37.08	89	52	1	14	268	491	579	2e-11	65.9	[K] KOG0261 RNA polymerase III, large subunit		KOG
19827_Transcript_1/1_Confidence_1.000_Length_341_45	341	B9GXM1_POPTR	90	62.22	45	16	1	1	135	14	57	5e-09	60.8		Populus trichocarpa (Western balsam poplar) (Populus balsamifera subsp. trichocarpa).	TrEMBL
19830_Transcript_1/1_Confidence_1.000_Length_378_45	378	A2Q3Y8_MEDTR	74	61.54	65	23	1	142	336	4	66	6e-15	80.5		Medicago truncatula (Barrel medic) (Medicago tribuloides).	TrEMBL
19843_Transcript_1/2_Confidence_1.000_Length_861_45	861	RL15B_PICMA	204	79.41	204	42	0	838	227	1	204	3e-94	341	Full=60S ribosomal protein L15-2;	Picea mariana (Black spruce) (Abies mariana).	Swiss-Prot
19851_Transcript_2/4_Confidence_0.700_Length_2674_45	2674	LOC_OS11G19250_PlantCyc_LOC_OS11G19250.1-MONOMER	785	70.04	791	225	9	95	2455	1	783	0	1074	0	0	PlantCyc
19866_Transcript_1/1_Confidence_1.000_Length_3180_45	3180	At1g76630	1064	44.25	913	448	9	4	2730	201	1056	0	671	[A] KOG1127 TPR repeat-containing protein		KOG
19881_Transcript_4/4_Confidence_0.538_Length_1161_45	1161	At5g07630	401	42.11	209	62	2	1159	533	241	390	7e-40	163	[D] KOG2864 Nuclear division RFT1 protein		KOG
19903_Transcript_3/3_Confidence_0.667_Length_2706_45	2706	F6H424_VITVI	665	38	650	373	11	249	2126	3	646	2e-101	372		Vitis vinifera (Grape).	TrEMBL
19906_Transcript_2/4_Confidence_0.700_Length_1842_45	1842	At5g42220	902	40.42	522	258	11	1695	196	22	512	2e-84	312	[O] KOG4248 Ubiquitin-like protein, regulator of apoptosis		KOG
19908_Transcript_1/2_Confidence_1.000_Length_421_45	421	At3g55220	1214	94.37	71	4	0	1	213	1144	1214	1e-34	143	[L] KOG1897 Damage-specific DNA binding complex, subunit DDB1		KOG
1990_Transcript_1/2_Confidence_1.000_Length_2133_45	2133	EIL3_ARATH	567	52.58	504	202	11	113	1603	16	489	3e-123	439	Full=ETHYLENE INSENSITIVE 3-like 3 protein;	Arabidopsis thaliana (Mouse-ear cress).	Swiss-Prot
19914_Transcript_1/2_Confidence_1.000_Length_1783_45	1783	PURA_ORYSI	487	83.57	426	70	0	1781	504	62	487	0	743	Full=Adenylosuccinate synthetase, chloroplastic;	Oryza sativa subsp. indica (Rice).	Swiss-Prot
19928_Transcript_1/1_Confidence_1.000_Length_405_45	405	LOC_OS12G04260_PlantCyc_LOC_OS12G04260.1-MONOMER	427	73.28	116	31	0	404	57	305	420	5e-45	174	0	0	PlantCyc
19929_Transcript_1/4_Confidence_0.625_Length_1148_45	1148	P2C43_ORYSJ	388	78.51	242	52	0	17	742	64	305	2e-133	382	Full=Probable protein phosphatase 2C 43;	Oryza sativa subsp. japonica (Rice).	Swiss-Prot
19937_Transcript_3/3_Confidence_0.600_Length_1851_45	1851	Q9SGH4_PlantCyc_AT3G01440-MONOMER	220	52.05	73	34	1	757	975	149	220	2e-12	69.3	PSII-Q subunit	Arabidopsis thaliana	PlantCyc
19942_Transcript_5/5_Confidence_0.600_Length_1491_45	1491	P2C52_ORYSJ	491	78.76	226	47	1	613	1290	266	490	1e-113	358	Full=Probable protein phosphatase 2C 52;	Oryza sativa subsp. japonica (Rice).	Swiss-Prot
19955_Transcript_1/1_Confidence_1.000_Length_1655_45	1655	RCD1_ARATH	589	31.46	89	59	1	1030	770	75	163	8e-09	58.9	Full=Inactive poly [ADP-ribose] polymerase RCD1;	Arabidopsis thaliana (Mouse-ear cress).	Swiss-Prot
19959_Transcript_1/1_Confidence_1.000_Length_681_45	681	D7STG8_VITVI	245	71.82	110	31	0	351	680	103	212	1e-41	171		Vitis vinifera (Grape).	TrEMBL
19971_Transcript_1/1_Confidence_1.000_Length_946_45	946	F2DVD2_HORVD	144	68.89	90	28	0	456	187	51	140	4e-34	146		Hordeum vulgare var. distichum (Two-rowed barley).	TrEMBL
19977_Transcript_1/6_Confidence_0.500_Length_1028_45	1028	MPK5_ORYSJ	369	84.04	188	30	0	465	1028	139	326	2e-157	338	Full=Mitogen-activated protein kinase 5;	Oryza sativa subsp. japonica (Rice).	Swiss-Prot
19977_Transcript_4/6_Confidence_0.500_Length_1052_45	1052	MPK5_ORYSJ	369	84.04	188	30	0	489	1052	139	326	2e-157	338	Full=Mitogen-activated protein kinase 5;	Oryza sativa subsp. japonica (Rice).	Swiss-Prot
19977_Transcript_5/6_Confidence_0.429_Length_1112_45	1112	MPK5_ORYSJ	369	87.4	246	31	0	1	738	8	253	2e-126	448	Full=Mitogen-activated protein kinase 5;	Oryza sativa subsp. japonica (Rice).	Swiss-Prot
19981_Transcript_4/5_Confidence_0.545_Length_974_45	974	LOC_OS02G38440_PlantCyc_LOC_OS02G38440.1-MONOMER	325	75	108	27	0	442	119	218	325	1e-46	181	0	0	PlantCyc
19982_Transcript_1/1_Confidence_1.000_Length_311_45	311	SGN-U602839_PlantCyc_SGN-U346523-MONOMER	150	62.16	37	14	0	22	132	110	146	2e-08	51.6	DUTP PYROPHOSPHATASE	Solanum lycopersicum	PlantCyc
19997_Transcript_1/2_Confidence_1.000_Length_773_45	773	TRAB1_ORYSJ	318	63.64	55	20	0	294	458	225	279	4e-12	68.6	Full=bZIP transcription factor TRAB1;	Oryza sativa subsp. japonica (Rice).	Swiss-Prot
20000_Transcript_1/1_Confidence_1.000_Length_208_45	208	CSLA1_ORYSJ	521	68.75	48	15	0	3	146	355	402	2e-15	77	Full=Glucomannan 4-beta-mannosyltransferase 1;	Oryza sativa subsp. japonica (Rice).	Swiss-Prot
20003_Transcript_1/1_Confidence_1.000_Length_679_45	679	MNB1B_MAIZE	157	66.4	125	38	3	632	261	1	122	7e-38	153	Full=DNA-binding protein MNB1B;	Zea mays (Maize).	Swiss-Prot
20011_Transcript_1/1_Confidence_1.000_Length_385_45	385	BH144_ARATH	251	44.07	59	29	1	220	384	19	77	9e-09	55.5	Full=Transcription factor bHLH144;	Arabidopsis thaliana (Mouse-ear cress).	Swiss-Prot
20014_Transcript_2/3_Confidence_0.600_Length_1033_45	1033	B6U583_MAIZE	234	41.94	217	95	11	1	621	33	228	1e-21	105		Zea mays (Maize).	TrEMBL
20016_Transcript_3/3_Confidence_0.778_Length_758_45	758	F2CVP1_HORVD	328	46.61	221	87	4	189	758	77	297	3e-42	173		Hordeum vulgare var. distichum (Two-rowed barley).	TrEMBL
2001_Transcript_1/1_Confidence_1.000_Length_2295_45	2295	MAOX_VITVI	591	81.06	565	107	0	296	1990	27	591	0	948	Full=NADP-dependent malic enzyme;	Vitis vinifera (Grape).	Swiss-Prot
20028_Transcript_1/1_Confidence_1.000_Length_471_45	471	LOC_OS10G14920_PlantCyc_LOC_OS10G14920.1-MONOMER	364	76.67	90	21	0	3	272	241	330	1e-37	150	0	0	PlantCyc
20039_Transcript_1/3_Confidence_0.714_Length_3092_45	3092	RH42_ARATH	1166	23.57	263	177	7	2040	1309	39	296	8e-10	63.2	Full=DEAD-box ATP-dependent RNA helicase 42;	Arabidopsis thaliana (Mouse-ear cress).	Swiss-Prot
2003_Transcript_1/1_Confidence_1.000_Length_1298_45	1298	At3g07700	670	61.61	435	134	7	1287	1	1	408	3e-140	497	[R] KOG1235 Predicted unusual protein kinase		KOG
20043_Transcript_1/1_Confidence_1.000_Length_299_45	299	Y1457_ARATH	704	69.7	99	30	0	1	297	132	230	5e-36	145	Full=Acyltransferase-like protein At1g54570, chloroplastic;	Arabidopsis thaliana (Mouse-ear cress).	Swiss-Prot
20046_Transcript_1/1_Confidence_1.000_Length_426_45	426	RK4_TOBAC	282	71.76	85	23	1	426	172	169	252	8e-31	129	Full=50S ribosomal protein L4, chloroplastic;	Nicotiana tabacum (Common tobacco).	Swiss-Prot
20051_Transcript_1/2_Confidence_1.000_Length_505_45	505	Y3649_ARATH	588	59.26	27	11	0	200	120	1	27	6e-07	38.1	Full=BTB/POZ domain-containing protein At3g26490;	Arabidopsis thaliana (Mouse-ear cress).	Swiss-Prot
2005_Transcript_2/6_Confidence_0.467_Length_986_45	986	Q2QXS1_ORYSJ	436	61.11	72	26	2	655	870	311	380	5e-15	83.2		Oryza sativa subsp. japonica (Rice).	TrEMBL
2005_Transcript_4/6_Confidence_0.533_Length_1337_45	1337	Q2QXS1_ORYSJ	436	61.11	72	26	2	1006	1221	311	380	8e-15	83.2		Oryza sativa subsp. japonica (Rice).	TrEMBL
20064_Transcript_1/1_Confidence_1.000_Length_593_45	593	Y4844_ARATH	153	84.31	51	8	0	500	348	90	140	1e-18	89.7	Full=Uncharacterized protein At4g28440;	Arabidopsis thaliana (Mouse-ear cress).	Swiss-Prot
20067_Transcript_3/4_Confidence_0.667_Length_2155_45	2155	Y1461_ARATH	572	68.12	549	153	8	2154	568	17	563	0	736	Full=Probable serine/threonine-protein kinase At1g54610;	Arabidopsis thaliana (Mouse-ear cress).	Swiss-Prot
20079_Transcript_2/2_Confidence_1.000_Length_1685_45	1685	SUBL_ARATH	757	41.86	516	274	15	7	1533	261	757	4e-92	335	Full=Subtilisin-like protease;	Arabidopsis thaliana (Mouse-ear cress).	Swiss-Prot
20102_Transcript_1/2_Confidence_1.000_Length_391_45	391	PPA1_SOLLC	255	45.35	86	47	0	1	258	168	253	5e-18	86.3	Full=Acid phosphatase 1;	Solanum lycopersicum (Tomato) (Lycopersicon esculentum).	Swiss-Prot
20105_Transcript_1/1_Confidence_1.000_Length_232_45	232	ADF2_PETHY	143	93.1	29	2	0	144	230	1	29	1e-09	58.2	Full=Actin-depolymerizing factor 2;	Petunia hybrida (Petunia).	Swiss-Prot
20107_Transcript_1/1_Confidence_1.000_Length_1114_45	1114	4ON1_ARATH	247	29.07	86	61	0	259	2	76	161	2e-10	58.5	Full=Protein At-4/1;	Arabidopsis thaliana (Mouse-ear cress).	Swiss-Prot
2010_Transcript_1/1_Confidence_1.000_Length_463_45	463	PP435_ARATH	544	41.33	150	88	0	3	452	375	524	8e-30	125	Full=Putative pentatricopeptide repeat-containing protein At5g59200, chloroplastic;	Arabidopsis thaliana (Mouse-ear cress).	Swiss-Prot
20117_Transcript_1/1_Confidence_1.000_Length_631_45	631	MLO4_ARATH	573	71.2	191	55	0	573	1	130	320	1e-83	305	Full=MLO-like protein 4;	Arabidopsis thaliana (Mouse-ear cress).	Swiss-Prot
20131_Transcript_1/1_Confidence_1.000_Length_561_45	561	TPST_ARATH	500	51.35	74	36	0	24	245	359	432	5e-17	84	Full=Protein-tyrosine sulfotransferase;	Arabidopsis thaliana (Mouse-ear cress).	Swiss-Prot
20146_Transcript_3/3_Confidence_0.778_Length_1514_45	1514	Y1559_ARATH	653	72.46	345	89	2	1514	483	289	628	3e-134	475	Full=DUF21 domain-containing protein At1g55930, chloroplastic;	Arabidopsis thaliana (Mouse-ear cress).	Swiss-Prot
20152_Transcript_1/2_Confidence_1.000_Length_900_45	900	At1g25380	376	62.5	160	60	0	6	485	163	322	2e-57	221	[C] KOG0757 Mitochondrial carrier protein - Rim2p/Mrs12p		KOG
20165_Transcript_2/3_Confidence_0.667_Length_875_45	875	IAA21_ORYSJ	266	63.92	194	65	3	1	567	73	266	6e-62	234	Full=Auxin-responsive protein IAA21;	Oryza sativa subsp. japonica (Rice).	Swiss-Prot
2017_Transcript_3/4_Confidence_0.600_Length_1432_45	1432	GDL16_ARATH	394	50.14	345	166	5	105	1130	34	375	7e-91	331	Full=GDSL esterase/lipase At1g31550;	Arabidopsis thaliana (Mouse-ear cress).	Swiss-Prot
20190_Transcript_1/1_Confidence_1.000_Length_1322_45	1322	At2g40780	171	52.6	173	71	3	562	1053	1	171	2e-40	165	[J] KOG2925 Predicted translation initiation factor related to eIF-1A		KOG
2019_Transcript_3/4_Confidence_0.545_Length_1319_45	1319	NUDT2_ARATH	278	55.43	184	73	1	134	685	5	179	5e-53	205	Full=Nudix hydrolase 2;	Arabidopsis thaliana (Mouse-ear cress).	Swiss-Prot
20222_Transcript_1/1_Confidence_1.000_Length_383_45	383	LECA_CASCR	309	44.68	94	51	1	87	365	214	307	4e-19	89.7	Full=Agglutinin;	Castanea crenata (Japanese chestnut).	Swiss-Prot
20227_Transcript_2/2_Confidence_1.000_Length_503_45	503	GONS3_ARATH	372	77.25	167	37	1	1	501	101	266	2e-62	234	Full=GDP-mannose transporter GONST3;	Arabidopsis thaliana (Mouse-ear cress).	Swiss-Prot
20239_Transcript_1/3_Confidence_0.714_Length_923_45	923	EIF3D_ARATH	591	87.5	112	14	0	1	336	435	546	4e-53	204	Full=Eukaryotic translation initiation factor 3 subunit D;	Arabidopsis thaliana (Mouse-ear cress).	Swiss-Prot
20253_Transcript_2/2_Confidence_1.000_Length_348_45	348	Q6YXY6_ORYSJ	323	59.18	49	20	0	3	149	275	323	5e-09	60.8		Oryza sativa subsp. japonica (Rice).	TrEMBL
2027_Transcript_3/5_Confidence_0.750_Length_3010_45	3010	At2g31660	1037	61.68	1036	308	10	80	2950	1	1026	0	1158	[YU] KOG1991 Nuclear transport receptor RANBP7/RANBP8 (importin beta superfamily)		KOG
20284_Transcript_1/1_Confidence_1.000_Length_663_45	663	BURPC_ORYSJ	627	78.72	141	30	0	1	423	487	627	3e-65	244	Full=BURP domain-containing protein 12;	Oryza sativa subsp. japonica (Rice).	Swiss-Prot
20293_Transcript_1/2_Confidence_1.000_Length_2112_45	2112	Y3739_ARATH	588	54.34	587	252	8	26	1765	1	578	1e-165	580	Full=Uncharacterized membrane protein At3g27390;	Arabidopsis thaliana (Mouse-ear cress).	Swiss-Prot
20294_Transcript_2/2_Confidence_1.000_Length_483_45	483	At5g10780	194	84.91	106	16	0	1	318	62	167	6e-44	174	[S] KOG3318 Predicted membrane protein		KOG
20296_Transcript_3/10_Confidence_0.565_Length_1747_45	1747	BCH_GENLU	320	62.96	189	30	2	1001	1558	164	315	4e-71	211	Full=Beta-carotene 3-hydroxylase, chloroplastic;	Gentiana lutea (Yellow gentian).	Swiss-Prot
20296_Transcript_6/10_Confidence_0.565_Length_1671_45	1671	BCH_GENLU	320	62.96	189	30	2	915	1472	164	315	4e-76	211	Full=Beta-carotene 3-hydroxylase, chloroplastic;	Gentiana lutea (Yellow gentian).	Swiss-Prot
20297_Transcript_1/1_Confidence_1.000_Length_340_45	340	D5L121_MALDO	227	65.91	44	10	3	332	213	164	206	2e-06	52		Malus domestica (Apple) (Pyrus malus).	TrEMBL
20303_Transcript_1/2_Confidence_1.000_Length_736_45	736	UBC28_ARATH	148	97.3	148	4	0	142	585	1	148	4e-84	307	Full=Ubiquitin-conjugating enzyme E2 28;	Arabidopsis thaliana (Mouse-ear cress).	Swiss-Prot
2030_Transcript_1/2_Confidence_1.000_Length_1939_45	1939	ERDL6_ARATH	487	77.31	335	71	2	1939	935	17	346	2e-147	520	Full=Sugar transporter ERD6-like 6;	Arabidopsis thaliana (Mouse-ear cress).	Swiss-Prot
2031_Transcript_2/5_Confidence_0.545_Length_951_45	951	RBOHD_SOLTU	858	68.88	196	42	2	1	588	682	858	8e-71	263	Full=Respiratory burst oxidase homolog protein D;	Solanum tuberosum (Potato).	Swiss-Prot
2031_Transcript_5/5_Confidence_0.455_Length_1074_45	1074	RBOHD_SOLTU	858	67.86	196	44	2	1	588	682	858	5e-70	261	Full=Respiratory burst oxidase homolog protein D;	Solanum tuberosum (Potato).	Swiss-Prot
20322_Transcript_1/3_Confidence_0.714_Length_1198_45	1198	At1g18490	379	53.54	254	109	4	82	828	128	377	8e-74	276	[S] KOG4281 Uncharacterized conserved protein		KOG
20325_Transcript_1/2_Confidence_1.000_Length_1101_45	1101	LOC_OS01G49890_PlantCyc_LOC_OS01G49890.1-MONOMER	525	85.45	268	39	0	1	804	249	516	9e-133	468	0	0	PlantCyc
20329_Transcript_1/1_Confidence_1.000_Length_626_45	626	At5g03640	926	30.85	201	101	8	67	597	1	187	5e-10	62.8	[R] KOG0610 Putative serine/threonine protein kinase		KOG
2032_Transcript_1/4_Confidence_0.667_Length_678_45	678	RL30_MAIZE	112	84.82	112	17	0	639	304	1	112	9e-52	199	Full=60S ribosomal protein L30;	Zea mays (Maize).	Swiss-Prot
20330_Transcript_1/1_Confidence_1.000_Length_1124_45	1124	C5XQI5_SORBI	256	68.05	241	77	0	227	949	1	241	1e-95	351		Sorghum bicolor (Sorghum) (Sorghum vulgare).	TrEMBL
20346_Transcript_1/2_Confidence_1.000_Length_2439_45	2439	C2D61_ARATH	751	51.27	671	293	5	2242	269	25	674	0	682	Full=C2 domain-containing protein At1g53590;	Arabidopsis thaliana (Mouse-ear cress).	Swiss-Prot
20352_Transcript_1/4_Confidence_0.700_Length_2129_45	2129	Q94JQ3_PlantCyc_AT4G32520-MONOMER	529	71.95	524	147	0	1956	385	6	529	0	759	glycine hydroxymethyltransferase	Arabidopsis thaliana	PlantCyc
20368_Transcript_1/2_Confidence_1.000_Length_621_45	621	B6TLX2_MAIZE	91	69.44	72	22	0	543	328	1	72	8e-24	111		Zea mays (Maize).	TrEMBL
20376_Transcript_1/1_Confidence_1.000_Length_433_45	433	CTR1_ARATH	821	74.19	31	8	0	157	65	596	626	3e-07	50.8	Full=Serine/threonine-protein kinase CTR1;	Arabidopsis thaliana (Mouse-ear cress).	Swiss-Prot
20377_Transcript_2/3_Confidence_0.750_Length_786_45	786	MED21_ARATH	139	65.31	98	29	2	180	458	1	98	1e-26	116	Full=Mediator of RNA polymerase II transcription subunit 21;	Arabidopsis thaliana (Mouse-ear cress).	Swiss-Prot
20383_Transcript_1/1_Confidence_1.000_Length_560_45	560	At2g39020	236	49.67	151	70	2	448	5	30	177	7e-29	125	[E] KOG3216 Diamine acetyltransferase		KOG
20393_Transcript_1/1_Confidence_1.000_Length_500_45	500	Q93X76_GOSHI	473	78.31	166	36	0	1	498	174	339	9e-68	256		Gossypium hirsutum (Upland cotton) (Gossypium mexicanum).	TrEMBL
20402_Transcript_3/4_Confidence_0.625_Length_707_45	707	At5g27730	455	34.11	129	70	1	641	255	315	428	7e-15	79.3	[S] KOG4683 Uncharacterized conserved protein		KOG
20411_Transcript_1/2_Confidence_1.000_Length_484_45	484	At3g52180_1	248	42.2	109	52	3	40	333	4	112	6e-24	77	[V] KOG1716 Dual specificity phosphatase		KOG
20423_Transcript_2/2_Confidence_1.000_Length_821_45	821	NUD17_ARATH	182	55.35	159	63	2	576	121	6	163	1e-43	173	Full=Nudix hydrolase 17, mitochondrial;	Arabidopsis thaliana (Mouse-ear cress).	Swiss-Prot
20428_Transcript_1/1_Confidence_1.000_Length_333_45	333	NAC29_ARATH	268	38.54	96	52	4	6	284	94	185	9e-12	65.1	Full=NAC domain-containing protein 29;	Arabidopsis thaliana (Mouse-ear cress).	Swiss-Prot
2042_Transcript_2/7_Confidence_0.526_Length_2831_45	2831	At1g22930	1131	42.87	870	434	16	34	2607	305	1123	5e-171	599	[T] KOG1981 SOK1 kinase belonging to the STE20/SPS1/GC kinase family		KOG
20436_Transcript_1/1_Confidence_1.000_Length_537_45	537	BRL2_ARATH	1143	40.17	117	69	1	3	350	612	728	6e-14	73.6	Full=Serine/threonine-protein kinase BRI1-like 2;	Arabidopsis thaliana (Mouse-ear cress).	Swiss-Prot
2043_Transcript_1/5_Confidence_0.500_Length_1541_45	1541	Q9M4C5_AVEFA	442	39.76	425	195	18	55	1179	27	440	1e-64	249		Avena fatua (Wild oats).	TrEMBL
20440_Transcript_1/1_Confidence_1.000_Length_526_45	526	PIN8_ARATH	351	61.27	142	55	0	26	451	195	336	7e-44	172	Full=Putative auxin efflux carrier component 8;	Arabidopsis thaliana (Mouse-ear cress).	Swiss-Prot
20442_Transcript_1/1_Confidence_1.000_Length_961_45	961	B8AY94_ORYSI	720	74.17	271	67	1	2	814	99	366	3e-112	405		Oryza sativa subsp. indica (Rice).	TrEMBL
20443_Transcript_1/2_Confidence_1.000_Length_505_45	505	F6GSN1_VITVI	704	68.35	79	25	0	7	243	357	435	1e-23	110		Vitis vinifera (Grape).	TrEMBL
20443_Transcript_2/2_Confidence_1.000_Length_1180_45	1180	F6GSN1_VITVI	704	73.07	349	90	3	7	1044	357	704	9e-142	504		Vitis vinifera (Grape).	TrEMBL
20454_Transcript_1/1_Confidence_1.000_Length_728_45	728	BH030_ARATH	368	79.8	99	19	1	417	713	147	244	1e-36	149	Full=Transcription factor bHLH30;	Arabidopsis thaliana (Mouse-ear cress).	Swiss-Prot
20485_Transcript_1/1_Confidence_1.000_Length_311_45	311	SGN-U564398_PlantCyc_SGN-U343163-MONOMER	240	62.5	72	24	2	98	310	29	98	6e-19	86.7	INVERTASE	Solanum lycopersicum	PlantCyc
2048_Transcript_2/2_Confidence_1.000_Length_1780_45	1780	GBF3_ARATH	382	32.96	358	186	11	1286	243	64	377	4e-32	136	Full=G-box-binding factor 3;	Arabidopsis thaliana (Mouse-ear cress).	Swiss-Prot
20492_Transcript_1/2_Confidence_1.000_Length_303_45	303	PTR18_ARATH	596	56.57	99	43	0	301	5	195	293	5e-26	112	Full=Probable nitrite transporter At1g68570;	Arabidopsis thaliana (Mouse-ear cress).	Swiss-Prot
20517_Transcript_1/1_Confidence_1.000_Length_695_45	695	F6I2F0_VITVI	170	60.78	102	37	2	298	2	1	102	3e-29	129		Vitis vinifera (Grape).	TrEMBL
20523_Transcript_1/1_Confidence_1.000_Length_270_45	270	At4g36850	374	79.31	87	18	0	8	268	262	348	1e-38	155	[S] KOG2913 Predicted membrane protein		KOG
2052_Transcript_5/6_Confidence_0.412_Length_2356_45	2356	RPK2_ARATH	1151	78.68	319	64	2	55	1011	835	1149	2e-145	513	Full=LRR receptor-like serine/threonine-protein kinase RPK2;	Arabidopsis thaliana (Mouse-ear cress).	Swiss-Prot
20531_Transcript_1/1_Confidence_1.000_Length_409_45	409	ARR2_ARATH	664	37.38	107	64	2	4	318	215	320	9e-13	68.9	Full=Two-component response regulator ARR2;	Arabidopsis thaliana (Mouse-ear cress).	Swiss-Prot
20538_Transcript_1/2_Confidence_1.000_Length_768_45	768	Y5393_ARATH	806	49.33	223	101	5	766	116	568	784	2e-55	212	Full=Probable receptor-like protein kinase At5g39030;	Arabidopsis thaliana (Mouse-ear cress).	Swiss-Prot
2053_Transcript_1/1_Confidence_1.000_Length_1078_45	1078	PPA1_SOLLC	255	77.78	27	6	0	1075	995	101	127	1e-07	53.9	Full=Acid phosphatase 1;	Solanum lycopersicum (Tomato) (Lycopersicon esculentum).	Swiss-Prot
20542_Transcript_1/1_Confidence_1.000_Length_575_45	575	Y1745_ARATH	597	51.77	141	60	3	456	43	1	136	2e-32	135	Full=Uncharacterized protein At1g51745;	Arabidopsis thaliana (Mouse-ear cress).	Swiss-Prot
20544_Transcript_1/1_Confidence_1.000_Length_673_45	673	TMK1_ARATH	942	80.36	224	42	2	671	3	719	941	2e-100	361	Full=Probable receptor protein kinase TMK1;	Arabidopsis thaliana (Mouse-ear cress).	Swiss-Prot
20549_Transcript_1/1_Confidence_1.000_Length_221_45	221	PP330_ARATH	595	78.26	46	10	0	2	139	550	595	1e-18	87.8	Full=Pentatricopeptide repeat-containing protein At4g21065;	Arabidopsis thaliana (Mouse-ear cress).	Swiss-Prot
20551_Transcript_1/5_Confidence_0.583_Length_2602_45	2602	LOC_OS06G45980_PlantCyc_LOC_OS06G45980.1-MONOMER	723	81.53	249	46	0	1454	2200	453	701	4e-123	437	0	0	PlantCyc
20553_Transcript_1/2_Confidence_1.000_Length_465_45	465	Q0D4S7_ORYSJ	366	47.37	76	40	0	55	282	57	132	7e-16	84		Oryza sativa subsp. japonica (Rice).	TrEMBL
20554_Transcript_1/1_Confidence_1.000_Length_448_45	448	CB22_ORYSJ	261	97.67	86	2	0	2	259	176	261	1e-45	178	Full=Chlorophyll a-b binding protein 2, chloroplastic;	Oryza sativa subsp. japonica (Rice).	Swiss-Prot
20577_Transcript_1/2_Confidence_1.000_Length_1836_45	1836	LOC_OS08G23730_PlantCyc_LOC_OS08G23730.1-MONOMER	544	82.54	527	91	1	1738	161	18	544	0	895	0	0	PlantCyc
20592_Transcript_1/2_Confidence_1.000_Length_951_45	951	ESCA_ARATH	311	29.5	200	116	4	67	609	116	309	5e-12	68.6	Full=Putative DNA-binding protein ESCAROLA;	Arabidopsis thaliana (Mouse-ear cress).	Swiss-Prot
20593_Transcript_1/1_Confidence_1.000_Length_468_45	468	RNHX1_ARATH	620	38.22	157	90	6	461	9	36	191	2e-20	95.1	Full=Putative ribonuclease H protein At1g65750;	Arabidopsis thaliana (Mouse-ear cress).	Swiss-Prot
20606_Transcript_1/2_Confidence_1.000_Length_1550_45	1550	At3g22750	378	75.07	369	87	3	286	1386	13	378	2e-159	560	[T] KOG0192 Tyrosine kinase specific for activated (GTP-bound) p21cdc42Hs		KOG
2061_Transcript_2/4_Confidence_0.667_Length_1315_45	1315	Q8S8F9_PlantCyc_AT2G22570-MONOMER	244	54.01	274	96	3	1208	387	1	244	2e-77	284	nicotinamidase	Arabidopsis thaliana	PlantCyc
2061_Transcript_3/4_Confidence_0.667_Length_1234_45	1234	Q8S8F9_PlantCyc_AT2G22570-MONOMER	244	59.92	247	96	2	1127	387	1	244	6e-82	299	nicotinamidase	Arabidopsis thaliana	PlantCyc
20641_Transcript_2/3_Confidence_0.600_Length_1952_45	1952	At5g22480	493	65.37	462	158	1	225	1610	27	486	2e-173	608	[R] KOG2703 C4-type Zn-finger protein		KOG
20644_Transcript_1/1_Confidence_1.000_Length_722_45	722	CCAMK_LILLO	520	70.85	199	52	3	144	722	1	199	4e-72	267	Full=Calcium and calcium/calmodulin-dependent serine/threonine-protein kinase;	Lilium longiflorum (Trumpet lily).	Swiss-Prot
20648_Transcript_1/1_Confidence_1.000_Length_976_45	976	At2g45720	553	57.07	205	86	1	975	361	332	534	1e-62	238	[S] KOG0167 FOG: Armadillo/beta-catenin-like repeats		KOG
20663_Transcript_1/1_Confidence_1.000_Length_778_45	778	At3g01400	355	54.22	83	38	0	48	296	260	342	4e-16	83.6	[S] KOG0167 FOG: Armadillo/beta-catenin-like repeats		KOG
20680_Transcript_1/1_Confidence_1.000_Length_853_45	853	CRI4_MAIZE	901	86.88	282	36	1	851	9	528	809	5e-140	493	Full=Putative receptor protein kinase CRINKLY4;	Zea mays (Maize).	Swiss-Prot
20688_Transcript_1/1_Confidence_1.000_Length_501_45	501	B9HHI3_POPTR	1225	49.29	140	71	0	479	60	813	952	3e-35	148		Populus trichocarpa (Western balsam poplar) (Populus balsamifera subsp. trichocarpa).	TrEMBL
2068_Transcript_2/2_Confidence_1.000_Length_463_45	463	Y3985_ARATH	554	69.9	103	31	0	4	312	361	463	3e-38	154	Full=BTB/POZ domain-containing protein At3g19850;	Arabidopsis thaliana (Mouse-ear cress).	Swiss-Prot
206_Transcript_3/4_Confidence_0.538_Length_1370_45	1370	At2g16860	328	62.15	325	83	3	294	1148	4	328	6e-111	399	[DA] KOG2609 Cyclin D-interacting protein GCIP		KOG
20702_Transcript_1/1_Confidence_1.000_Length_287_45	287	At4g29850	103	69.81	53	15	1	127	285	1	52	4e-14	74.7	[S] KOG4753 Predicted membrane protein		KOG
20708_Transcript_1/1_Confidence_1.000_Length_1899_45	1899	A5BWU6_VITVI	864	45.51	167	75	6	1115	1591	48	206	9e-44	117		Vitis vinifera (Grape).	TrEMBL
20724_Transcript_2/3_Confidence_0.667_Length_934_45	934	UBP3_ARATH	371	76.43	157	26	3	867	406	219	367	1e-50	196	Full=Ubiquitin carboxyl-terminal hydrolase 3;	Arabidopsis thaliana (Mouse-ear cress).	Swiss-Prot
20737_Transcript_3/4_Confidence_0.667_Length_2326_45	2326	At3g60400	558	39.81	540	316	5	7	1626	21	551	4e-104	377	[KR] KOG1267 Mitochondrial transcription termination factor, mTERF		KOG
20741_Transcript_1/3_Confidence_0.714_Length_1474_45	1474	At5g58720	519	41.35	416	193	9	16	1218	139	518	2e-65	248	[L] KOG2401 Predicted MutS-related protein involved in mismatch repair		KOG
20744_Transcript_2/5_Confidence_0.364_Length_590_45	590	C5YF11_SORBI	411	59.57	94	38	0	3	284	50	143	1e-25	117		Sorghum bicolor (Sorghum) (Sorghum vulgare).	TrEMBL
20744_Transcript_3/5_Confidence_0.455_Length_1073_45	1073	Y5458_ARATH	695	55.81	43	18	1	322	447	29	71	6e-07	52	Full=Probable LRR receptor-like serine/threonine-protein kinase At5g45840;	Arabidopsis thaliana (Mouse-ear cress).	Swiss-Prot
20746_Transcript_3/5_Confidence_0.556_Length_863_45	863	DAG_ANTMA	230	60	105	42	0	682	368	80	184	2e-33	139	Full=DAG protein, chloroplastic;	Antirrhinum majus (Garden snapdragon).	Swiss-Prot
20753_Transcript_1/1_Confidence_1.000_Length_327_45	327	At4g21540	1240	42	100	53	3	301	2	281	375	1e-11	66.2	[IT] KOG1116 Sphingosine kinase, involved in sphingolipid metabolism		KOG
20754_Transcript_1/1_Confidence_1.000_Length_887_45	887	B9RGL5_RICCO	385	80.16	257	50	1	2	772	130	385	8e-118	424		Ricinus communis (Castor bean).	TrEMBL
2075_Transcript_1/3_Confidence_0.600_Length_543_45	543	LOC_OS07G42280_PlantCyc_LOC_OS07G42280.1-MONOMER	755	54.63	108	49	0	218	541	495	602	5e-27	115	0	0	PlantCyc
2075_Transcript_2/3_Confidence_0.600_Length_610_45	610	LOC_OS07G42280_PlantCyc_LOC_OS07G42280.1-MONOMER	755	56.36	110	48	0	2	331	484	593	1e-29	124	0	0	PlantCyc
20766_Transcript_1/1_Confidence_1.000_Length_511_45	511	CAF1P_ORYSJ	701	76.47	170	40	0	2	511	159	328	2e-70	261	Full=CRS2-associated factor 1, chloroplastic;	Oryza sativa subsp. japonica (Rice).	Swiss-Prot
2076_Transcript_4/6_Confidence_0.625_Length_1671_45	1671	RH34_ORYSJ	404	91.56	391	33	0	143	1315	14	404	0	701	Full=DEAD-box ATP-dependent RNA helicase 34;	Oryza sativa subsp. japonica (Rice).	Swiss-Prot
20773_Transcript_1/1_Confidence_1.000_Length_1400_45	1400	At5g26850	907	49.9	493	208	7	1	1395	4	485	9e-131	465	[R] KOG1877 Putative transmembrane protein cmp44E		KOG
20791_Transcript_1/1_Confidence_1.000_Length_357_45	357	F26_ARATH	744	92.19	64	5	0	3	194	680	743	1e-27	117	Full=6-phosphofructo-2-kinase/fructose-2,6-biphosphatase;	Arabidopsis thaliana (Mouse-ear cress).	Swiss-Prot
20793_Transcript_1/2_Confidence_1.000_Length_3018_45	3018	ARR12_ARATH	596	50.85	413	170	10	137	1345	11	400	3e-91	333	Full=Two-component response regulator ARR12;	Arabidopsis thaliana (Mouse-ear cress).	Swiss-Prot
20803_Transcript_1/1_Confidence_1.000_Length_885_45	885	DOF18_ARATH	352	29.83	181	85	9	838	410	162	338	8e-06	47.8	Full=Dof zinc finger protein DOF1.8;	Arabidopsis thaliana (Mouse-ear cress).	Swiss-Prot
2081_Transcript_1/2_Confidence_1.000_Length_2205_45	2205	DHBK_SOLLC	594	79.83	595	114	4	168	1943	1	592	0	834	Full=Putative 3,4-dihydroxy-2-butanone kinase;	Solanum lycopersicum (Tomato) (Lycopersicon esculentum).	Swiss-Prot
20835_Transcript_1/1_Confidence_1.000_Length_410_45	410	C5XNP8_SORBI	681	34.81	158	78	5	404	6	100	257	7e-14	77		Sorghum bicolor (Sorghum) (Sorghum vulgare).	TrEMBL
20848_Transcript_1/8_Confidence_0.611_Length_4507_45	4507	At3g61690	1388	40.99	1332	674	37	469	4314	1	1270	0	782	[L] KOG1906 DNA polymerase sigma		KOG
20849_Transcript_1/1_Confidence_1.000_Length_387_45	387	C3H46_ARATH	540	82.98	47	8	0	247	387	1	47	3e-14	73.6	Full=Zinc finger CCCH domain-containing protein 46;	Arabidopsis thaliana (Mouse-ear cress).	Swiss-Prot
20855_Transcript_1/2_Confidence_1.000_Length_882_45	882	At4g18950	421	58.33	48	20	0	354	497	353	400	3e-10	64.3	[T] KOG0192 Tyrosine kinase specific for activated (GTP-bound) p21cdc42Hs		KOG
2085_Transcript_1/1_Confidence_1.000_Length_247_45	247	At4g07850	1138	46.05	76	39	1	26	247	872	947	1e-12	69.7	[R] KOG0017 FOG: Transposon-encoded proteins with TYA, reverse transcriptase, integrase domains in various combinations		KOG
20862_Transcript_2/2_Confidence_1.000_Length_1737_45	1737	FPA_ARATH	901	45.34	580	243	15	1674	10	18	548	5e-124	441	Full=Flowering time control protein FPA;	Arabidopsis thaliana (Mouse-ear cress).	Swiss-Prot
20882_Transcript_1/2_Confidence_1.000_Length_586_45	586	Y3567_ARATH	441	57.52	113	42	3	1	333	331	439	2e-28	121	Full=BTB/POZ domain-containing protein At3g05675;	Arabidopsis thaliana (Mouse-ear cress).	Swiss-Prot
20895_Transcript_1/1_Confidence_1.000_Length_371_45	371	LRKS5_ARATH	652	33.33	87	50	3	248	3	21	104	5e-06	46.2	Full=Probable L-type lectin-domain containing receptor kinase S.5;	Arabidopsis thaliana (Mouse-ear cress).	Swiss-Prot
20896_Transcript_1/2_Confidence_1.000_Length_380_45	380	LIRP1_ORYSJ	128	64.15	53	18	1	378	220	76	127	1e-13	71.6	Full=Light-regulated protein;	Oryza sativa subsp. japonica (Rice).	Swiss-Prot
20913_Transcript_1/1_Confidence_1.000_Length_1859_45	1859	RNHX1_ARATH	620	25.78	353	232	8	1805	786	250	585	2e-17	87.4	Full=Putative ribonuclease H protein At1g65750;	Arabidopsis thaliana (Mouse-ear cress).	Swiss-Prot
20935_Transcript_3/3_Confidence_0.714_Length_1369_45	1369	GMPP3_ORYSJ	361	87.26	361	46	0	1261	179	1	361	0	660	Full=Probable mannose-1-phosphate guanylyltransferase 3;	Oryza sativa subsp. japonica (Rice).	Swiss-Prot
20940_Transcript_2/4_Confidence_0.500_Length_390_45	390	G7JWW1_MEDTR	514	41.67	84	48	1	2	250	327	410	7e-12	70.5		Medicago truncatula (Barrel medic) (Medicago tribuloides).	TrEMBL
20940_Transcript_3/4_Confidence_0.700_Length_701_45	701	B1B5X5_TOBAC	424	33.87	186	109	5	151	693	240	416	2e-20	93.6		Nicotiana tabacum (Common tobacco).	TrEMBL
20952_Transcript_1/3_Confidence_0.750_Length_2825_45	2825	LOC_OS05G02820_PlantCyc_LOC_OS05G02820.1-MONOMER	889	40.45	660	357	5	320	2197	92	749	4e-109	390	0	0	PlantCyc
20963_Transcript_1/1_Confidence_1.000_Length_450_45	450	B4FNC1_MAIZE	405	60.32	63	25	0	262	450	4	66	2e-14	79		Zea mays (Maize).	TrEMBL
20969_Transcript_2/3_Confidence_0.750_Length_802_45	802	HEM4_ORYSJ	302	50.41	246	85	4	720	1	9	223	4e-55	211	Full=Uroporphyrinogen-III synthase, chloroplastic;	Oryza sativa subsp. japonica (Rice).	Swiss-Prot
20969_Transcript_3/3_Confidence_0.750_Length_718_45	718	HEM4_ORYSJ	302	56.88	218	85	3	636	1	9	223	9e-60	226	Full=Uroporphyrinogen-III synthase, chloroplastic;	Oryza sativa subsp. japonica (Rice).	Swiss-Prot
2096_Transcript_4/5_Confidence_0.692_Length_1380_45	1380	At2g39340	989	35.53	304	163	8	501	1325	7	306	1e-29	129	[K] KOG1861 Leucine permease transcriptional regulator		KOG
2097_Transcript_5/6_Confidence_0.562_Length_1251_45	1251	NAC68_ORYSJ	318	82.35	153	25	1	133	585	12	164	6e-85	268	Full=NAC domain-containing protein 68;	Oryza sativa subsp. japonica (Rice).	Swiss-Prot
20997_Transcript_1/2_Confidence_1.000_Length_470_45	470	TOM6_ARATH	54	59.46	37	15	0	76	186	8	44	4e-08	53.9	Full=Mitochondrial import receptor subunit TOM6 homolog;	Arabidopsis thaliana (Mouse-ear cress).	Swiss-Prot
21008_Transcript_1/1_Confidence_1.000_Length_256_45	256	G7L4P5_MEDTR	542	58.14	43	18	0	128	256	48	90	4e-06	51.2		Medicago truncatula (Barrel medic) (Medicago tribuloides).	TrEMBL
21013_Transcript_1/1_Confidence_1.000_Length_417_45	417	GASAC_ARATH	106	62.5	80	26	1	361	122	31	106	4e-18	86.7	Full=Gibberellin-regulated protein 12;	Arabidopsis thaliana (Mouse-ear cress).	Swiss-Prot
21018_Transcript_2/2_Confidence_1.000_Length_817_45	817	AB29B_ARATH	634	50.92	218	107	0	1	654	134	351	3e-46	181	Full=ABC transporter B family member 29, chloroplastic;	Arabidopsis thaliana (Mouse-ear cress).	Swiss-Prot
2101_Transcript_1/4_Confidence_0.700_Length_2142_45	2142	At4g36980	550	54.58	306	110	7	551	1456	117	397	5e-54	211	[A] KOG2548 SWAP mRNA splicing regulator		KOG
21021_Transcript_1/1_Confidence_1.000_Length_346_45	346	At4g07840	769	44.44	108	47	3	40	342	273	374	5e-13	71.2	[R] KOG0017 FOG: Transposon-encoded proteins with TYA, reverse transcriptase, integrase domains in various combinations		KOG
21022_Transcript_1/1_Confidence_1.000_Length_272_45	272	LOC_OS06G04510_PlantCyc_LOC_OS06G04510.1-MONOMER	446	87.1	31	4	0	271	179	244	274	2e-10	58.5	0	0	PlantCyc
21034_Transcript_1/1_Confidence_1.000_Length_291_45	291	SHR1_ORYSJ	602	68.37	98	27	1	10	291	462	559	1e-18	87.8	Full=Protein SHORT-ROOT 1;	Oryza sativa subsp. japonica (Rice).	Swiss-Prot
21055_Transcript_1/1_Confidence_1.000_Length_970_45	970	D7TT92_VITVI	211	36.4	228	96	8	318	908	1	210	2e-13	78.2		Vitis vinifera (Grape).	TrEMBL
21073_Transcript_1/1_Confidence_1.000_Length_427_45	427	WRK20_ARATH	557	43.88	139	51	3	3	419	399	510	5e-24	106	Full=Probable WRKY transcription factor 20;	Arabidopsis thaliana (Mouse-ear cress).	Swiss-Prot
21112_Transcript_3/3_Confidence_0.667_Length_1263_45	1263	ING2_ARATH	262	66.67	72	18	3	1115	906	159	226	2e-23	100	Full=PHD finger protein ING2;	Arabidopsis thaliana (Mouse-ear cress).	Swiss-Prot
21113_Transcript_1/1_Confidence_1.000_Length_518_45	518	GSTFB_ARATH	214	52.86	70	33	0	485	276	142	211	2e-17	85.1	Full=Glutathione S-transferase F11;	Arabidopsis thaliana (Mouse-ear cress).	Swiss-Prot
21114_Transcript_3/3_Confidence_0.500_Length_1704_45	1704	TPST_ARATH	500	58.71	419	156	6	118	1356	30	437	3e-135	478	Full=Protein-tyrosine sulfotransferase;	Arabidopsis thaliana (Mouse-ear cress).	Swiss-Prot
21120_Transcript_1/5_Confidence_0.583_Length_1260_45	1260	MYB2_PHYPA	421	70.91	55	16	0	314	478	42	96	3e-40	86.7	Full=Myb-related protein Pp2;	Physcomitrella patens subsp. patens (Moss).	Swiss-Prot
2112_Transcript_4/7_Confidence_0.611_Length_1313_45	1313	RL72_ARATH	242	52.34	235	112	0	307	1011	8	242	7e-69	258	Full=60S ribosomal protein L7-2;	Arabidopsis thaliana (Mouse-ear cress).	Swiss-Prot
2113_Transcript_4/7_Confidence_0.647_Length_2077_45	2077	At5g53570	550	54.42	520	195	7	1781	240	58	541	2e-147	521	[T] KOG2197 Ypt/Rab-specific GTPase-activating protein GYP7 and related proteins		KOG
21167_Transcript_1/1_Confidence_1.000_Length_265_45	265	CID2_ARATH	143	51.16	43	21	0	4	132	7	49	1e-06	47.8	Full=Polyadenylate-binding protein-interacting protein 2;	Arabidopsis thaliana (Mouse-ear cress).	Swiss-Prot
2118_Transcript_1/2_Confidence_1.000_Length_591_45	591	C6T235_SOYBN	125	65	60	21	0	3	182	13	72	8e-17	87.8		Glycine max (Soybean) (Glycine hispida).	TrEMBL
21194_Transcript_1/1_Confidence_1.000_Length_358_45	358	FB285_ARATH	395	66.67	51	12	1	204	356	18	63	6e-15	75.5	Full=F-box protein At5g46170;	Arabidopsis thaliana (Mouse-ear cress).	Swiss-Prot
211_Transcript_1/2_Confidence_1.000_Length_2392_45	2392	COI1_ARATH	592	62.7	571	206	3	215	1915	18	585	0	738	Full=Coronatine-insensitive protein 1;	Arabidopsis thaliana (Mouse-ear cress).	Swiss-Prot
2120_Transcript_1/1_Confidence_1.000_Length_795_45	795	LEC_PARPC	447	32.03	153	85	7	228	665	8	148	5e-13	71.6	Full=Mannose/glucose-specific lectin;	Parkia platycephala.	Swiss-Prot
21213_Transcript_3/3_Confidence_0.600_Length_424_45	424	B9SWM4_RICCO	934	40.54	111	61	4	29	358	799	905	3e-06	51.6		Ricinus communis (Castor bean).	TrEMBL
21214_Transcript_1/1_Confidence_1.000_Length_1353_45	1353	ALIS1_ARATH	350	71.73	329	91	2	246	1232	23	349	2e-135	479	Full=ALA-interacting subunit 1;	Arabidopsis thaliana (Mouse-ear cress).	Swiss-Prot
21215_Transcript_1/1_Confidence_1.000_Length_337_45	337	ETFB_ARATH	251	82.46	57	10	0	173	3	17	73	8e-10	58.5	Full=Electron transfer flavoprotein subunit beta, mitochondrial;	Arabidopsis thaliana (Mouse-ear cress).	Swiss-Prot
21223_Transcript_1/2_Confidence_1.000_Length_784_45	784	F2DEX9_HORVD	765	46.51	258	108	10	763	14	76	311	7e-45	181		Hordeum vulgare var. distichum (Two-rowed barley).	TrEMBL
21231_Transcript_1/1_Confidence_1.000_Length_369_45	369	NIFU1_ORYSJ	226	53.92	102	20	1	63	368	103	177	1e-22	101	Full=NifU-like protein 1, chloroplastic;	Oryza sativa subsp. japonica (Rice).	Swiss-Prot
2123_Transcript_6/10_Confidence_0.400_Length_3191_45	3191	NLP2_ORYSJ	936	46.59	910	415	18	586	3189	24	904	0	672	Full=Protein NLP2;	Oryza sativa subsp. japonica (Rice).	Swiss-Prot
21243_Transcript_1/1_Confidence_1.000_Length_760_45	760	DOF33_ARATH	448	50.48	208	77	7	67	639	2	200	8e-44	173	Full=Dof zinc finger protein DOF3.3;	Arabidopsis thaliana (Mouse-ear cress).	Swiss-Prot
2124_Transcript_2/5_Confidence_0.667_Length_2235_45	2235	At3g18170	519	39.66	464	241	9	1601	288	69	519	3e-94	345	[S] KOG4698 Uncharacterized conserved protein		KOG
21254_Transcript_1/2_Confidence_1.000_Length_1338_45	1338	At3g05290	322	65.62	320	106	2	119	1075	2	318	1e-99	362	[C] KOG0769 Predicted mitochondrial carrier protein		KOG
21259_Transcript_1/2_Confidence_1.000_Length_973_45	973	BH035_ARATH	248	52.26	243	107	4	906	196	5	244	8e-61	230	Full=Transcription factor bHLH35;	Arabidopsis thaliana (Mouse-ear cress).	Swiss-Prot
21260_Transcript_1/1_Confidence_1.000_Length_1366_45	1366	COQ3_ARATH	322	72.02	243	68	0	1036	308	76	318	6e-108	387	Full=Hexaprenyldihydroxybenzoate methyltransferase, mitochondrial;	Arabidopsis thaliana (Mouse-ear cress).	Swiss-Prot
21283_Transcript_1/1_Confidence_1.000_Length_367_45	367	F6HRG1_VITVI	227	76.47	119	28	0	367	11	43	161	4e-48	190		Vitis vinifera (Grape).	TrEMBL
21288_Transcript_1/1_Confidence_1.000_Length_470_45	470	At3g42860	372	47.06	51	26	1	430	281	96	146	1e-07	54.3	[O] KOG4400 E3 ubiquitin ligase interacting with arginine methyltransferase		KOG
21296_Transcript_3/3_Confidence_0.667_Length_1148_45	1148	RSP31_ARATH	264	63.75	240	83	4	121	837	1	237	2e-75	279	Full=Arginine/serine-rich-splicing factor RSP31;	Arabidopsis thaliana (Mouse-ear cress).	Swiss-Prot
21306_Transcript_3/4_Confidence_0.583_Length_1253_45	1253	Q9LUZ6_PlantCyc_AT5G58600-MONOMER	402	32.43	185	97	11	708	214	220	396	5e-15	77	UDP glycosyltransferase	Arabidopsis thaliana	PlantCyc
21342_Transcript_1/2_Confidence_1.000_Length_3176_45	3176	At5g63420	528	78.51	484	99	2	120	1571	37	515	0	767	[A] KOG1137 mRNA cleavage and polyadenylation factor II complex, BRR5 (CPSF subunit)		KOG
21351_Transcript_1/1_Confidence_1.000_Length_250_45	250	Q75KA1_ORYSJ	644	56.36	55	24	0	167	3	541	595	4e-09	61.2		Oryza sativa subsp. japonica (Rice).	TrEMBL
2135_Transcript_2/3_Confidence_0.714_Length_2316_45	2316	C5WYU5_SORBI	551	63.17	562	195	2	235	1920	1	550	0	758		Sorghum bicolor (Sorghum) (Sorghum vulgare).	TrEMBL
21363_Transcript_1/1_Confidence_1.000_Length_847_45	847	CPPM_ARATH	339	70.89	213	60	1	799	167	119	331	4e-78	287	Full=Carboxyvinyl-carboxyphosphonate phosphorylmutase, chloroplastic;	Arabidopsis thaliana (Mouse-ear cress).	Swiss-Prot
21369_Transcript_2/4_Confidence_0.667_Length_922_45	922	RHL1_ARATH	355	37.82	119	66	4	865	515	242	354	2e-07	53.1	Full=DNA-binding protein RHL1;	Arabidopsis thaliana (Mouse-ear cress).	Swiss-Prot
21377_Transcript_1/1_Confidence_1.000_Length_350_45	350	GASAC_ARATH	106	62.5	64	21	1	166	348	35	98	2e-11	63.5	Full=Gibberellin-regulated protein 12;	Arabidopsis thaliana (Mouse-ear cress).	Swiss-Prot
2138_Transcript_3/5_Confidence_0.692_Length_2630_45	2630	LOC_OS05G48340_PlantCyc_LOC_OS05G48340.1-MONOMER	526	57.99	388	162	1	1259	2419	139	526	1e-116	415	0	0	PlantCyc
2139_Transcript_2/2_Confidence_1.000_Length_854_45	854	At3g13570	262	84.69	98	15	0	182	475	34	131	4e-44	176	[R] KOG0118 FOG: RRM domain		KOG
21403_Transcript_1/5_Confidence_0.500_Length_486_45	486	LOC_OS08G44340_PlantCyc_LOC_OS08G44340.1-MONOMER	435	87.06	85	11	0	119	373	3	87	9e-40	157	0	0	PlantCyc
21403_Transcript_4/5_Confidence_0.500_Length_462_45	462	LOC_OS08G44340_PlantCyc_LOC_OS08G44340.1-MONOMER	435	89.02	82	9	0	216	461	19	100	3e-38	152	0	0	PlantCyc
21404_Transcript_1/4_Confidence_0.750_Length_2500_45	2500	SYM_ORYSJ	801	77.6	683	148	2	2500	461	11	691	0	1116	Full=Probable methionine--tRNA ligase;	Oryza sativa subsp. japonica (Rice).	Swiss-Prot
21415_Transcript_1/1_Confidence_1.000_Length_548_45	548	STP5_ARATH	506	34.46	177	116	0	531	1	1	177	2e-62	234	Full=Sugar transport protein 5;	Arabidopsis thaliana (Mouse-ear cress).	Swiss-Prot
2141_Transcript_1/1_Confidence_1.000_Length_2127_45	2127	At3g13772	641	81.52	617	108	2	2086	254	25	641	0	999	[U] KOG1278 Endosomal membrane proteins, EMP70		KOG
2142_Transcript_5/13_Confidence_0.647_Length_2767_45	2767	FERON_ARATH	895	57.58	884	356	12	2723	117	16	895	0	941	Full=Receptor-like protein kinase FERONIA;	Arabidopsis thaliana (Mouse-ear cress).	Swiss-Prot
2143_Transcript_2/4_Confidence_0.667_Length_1934_45	1934	B9MZU6_POPTR	1005	30.58	582	329	17	1834	272	438	1005	4e-62	241		Populus trichocarpa (Western balsam poplar) (Populus balsamifera subsp. trichocarpa).	TrEMBL
21443_Transcript_1/1_Confidence_1.000_Length_279_45	279	NUD16_ARATH	180	71.74	92	26	0	3	278	55	146	3e-29	123	Full=Nudix hydrolase 16, mitochondrial;	Arabidopsis thaliana (Mouse-ear cress).	Swiss-Prot
2144_Transcript_9/10_Confidence_0.583_Length_2737_45	2737	PMTK_ARATH	603	69.67	600	173	4	627	2399	2	601	0	894	Full=Probable methyltransferase PMT20;	Arabidopsis thaliana (Mouse-ear cress).	Swiss-Prot
21463_Transcript_1/1_Confidence_1.000_Length_227_45	227	At4g39490	479	50.68	73	36	0	6	224	91	163	5e-13	71.2	[QI] KOG0157 Cytochrome P450 CYP4/CYP19/CYP26 subfamilies		KOG
21469_Transcript_1/1_Confidence_1.000_Length_314_45	314	LYM1_ARATH	416	75.93	54	13	0	2	163	168	221	3e-17	83.2	Full=LysM domain-containing GPI-anchored protein 1;	Arabidopsis thaliana (Mouse-ear cress).	Swiss-Prot
21471_Transcript_1/1_Confidence_1.000_Length_1212_45	1212	HA22A_ARATH	177	63.75	160	58	0	220	699	4	163	2e-61	233	Full=HVA22-like protein a;	Arabidopsis thaliana (Mouse-ear cress).	Swiss-Prot
21476_Transcript_2/3_Confidence_0.667_Length_768_45	768	D7T6S8_VITVI	118	45.56	90	48	1	644	375	3	91	5e-14	79.3		Vitis vinifera (Grape).	TrEMBL
21477_Transcript_2/3_Confidence_0.600_Length_742_45	742	At1g23220	129	67.33	101	32	1	323	622	28	128	2e-33	140	[Z] KOG3430 Dynein light chain type 1		KOG
2147_Transcript_1/1_Confidence_1.000_Length_1069_45	1069	At3g60910	248	46.15	169	86	3	875	384	61	229	7e-29	126	[E] KOG2352 Predicted spermine/spermidine synthase		KOG
21496_Transcript_1/2_Confidence_1.000_Length_576_45	576	At1g64790	2428	55.17	58	25	1	73	243	859	916	5e-17	64.3	[J] KOG1242 Protein containing adaptin N-terminal region		KOG
21497_Transcript_1/1_Confidence_1.000_Length_405_45	405	LOC_OS10G14920_PlantCyc_LOC_OS10G14920.1-MONOMER	364	32.61	138	76	2	400	2	110	235	1e-07	50.1	0	0	PlantCyc
2150_Transcript_1/2_Confidence_1.000_Length_1531_45	1531	SGN-U574106_PlantCyc_SGN-U318644-MONOMER;	387	49.87	385	165	4	98	1174	5	387	1e-85	311	0	0	PlantCyc
2151_Transcript_3/5_Confidence_0.556_Length_902_45	902	SCAM4_ARATH	264	74.65	142	36	0	901	476	37	178	6e-63	237	Full=Secretory carrier-associated membrane protein 4;	Arabidopsis thaliana (Mouse-ear cress).	Swiss-Prot
21524_Transcript_1/1_Confidence_1.000_Length_343_45	343	At2g13940	1501	55.06	89	40	0	342	76	1404	1492	1e-22	103	[R] KOG0017 FOG: Transposon-encoded proteins with TYA, reverse transcriptase, integrase domains in various combinations		KOG
2152_Transcript_2/6_Confidence_0.462_Length_1116_45	1116	5NG4_PINTA	410	37.56	213	129	2	413	1039	131	343	4e-41	165	Full=Auxin-induced protein 5NG4;	Pinus taeda (Loblolly pine).	Swiss-Prot
2152_Transcript_5/6_Confidence_0.538_Length_1204_45	1204	5NG4_PINTA	410	34.38	256	165	1	53	811	15	270	1e-56	164	Full=Auxin-induced protein 5NG4;	Pinus taeda (Loblolly pine).	Swiss-Prot
21533_Transcript_2/2_Confidence_1.000_Length_2352_45	2352	C3H14_ORYSJ	300	58.02	262	91	7	1042	287	44	296	6e-79	292	Full=Zinc finger CCCH domain-containing protein 14;	Oryza sativa subsp. japonica (Rice).	Swiss-Prot
2154_Transcript_4/7_Confidence_0.429_Length_3554_45	3554	At3g52250	1677	31.58	855	460	21	1092	3362	379	1206	3e-82	306	[K] KOG1878 Nuclear receptor coregulator SMRT/SMRTER, contains Myb-like domains		KOG
21561_Transcript_1/1_Confidence_1.000_Length_387_45	387	ANM1_ORYSJ	387	79.31	29	6	0	88	2	232	260	2e-08	54.3	Full=Probable protein arginine N-methyltransferase 1;	Oryza sativa subsp. japonica (Rice).	Swiss-Prot
21563_Transcript_3/3_Confidence_0.625_Length_791_45	791	LOC_OS07G08630_PlantCyc_LOC_OS07G08630.1-MONOMER	929	28.07	114	77	2	692	366	258	371	5e-07	49.7	0	0	PlantCyc
21564_Transcript_1/1_Confidence_1.000_Length_315_45	315	NO93_SOYBN	105	81.82	55	10	0	310	146	43	97	3e-19	89.7	Full=Early nodulin-93;	Glycine max (Soybean) (Glycine hispida).	Swiss-Prot
21585_Transcript_1/1_Confidence_1.000_Length_861_45	861	FB304_ARATH	1378	53.11	273	127	1	820	2	131	402	2e-79	291	Full=F-box protein At3g54460;	Arabidopsis thaliana (Mouse-ear cress).	Swiss-Prot
2158_Transcript_3/3_Confidence_0.500_Length_1349_45	1349	RA213_ARATH	261	48.83	213	76	6	739	1347	62	251	3e-34	142	Full=Ethylene-responsive transcription factor RAP2-13;	Arabidopsis thaliana (Mouse-ear cress).	Swiss-Prot
21590_Transcript_3/3_Confidence_0.667_Length_515_45	515	LOC_OS01G27520_PlantCyc_LOC_OS01G27520.1-MONOMER	559	50	162	61	5	10	471	351	500	6e-33	134	0	0	PlantCyc
2159_Transcript_1/1_Confidence_1.000_Length_1519_45	1519	At1g03110	309	36.23	403	131	12	151	1356	19	296	1e-41	169	[S] KOG3914 WD repeat protein WDR4		KOG
21611_Transcript_1/2_Confidence_1.000_Length_552_45	552	C5XGH5_SORBI	418	68.38	117	33	1	1	339	47	163	2e-37	155		Sorghum bicolor (Sorghum) (Sorghum vulgare).	TrEMBL
21619_Transcript_1/2_Confidence_1.000_Length_656_45	656	C5WTB0_SORBI	150	53.1	113	47	4	91	426	13	120	8e-26	95.1		Sorghum bicolor (Sorghum) (Sorghum vulgare).	TrEMBL
2163_Transcript_5/8_Confidence_0.438_Length_1440_45	1440	F2D0N3_HORVD	445	67.17	332	104	4	452	1438	79	408	2e-122	441		Hordeum vulgare var. distichum (Two-rowed barley).	TrEMBL
21641_Transcript_1/1_Confidence_1.000_Length_382_45	382	LOC_OS03G13920_PlantCyc_LOC_OS03G13920.1-MONOMER	1111	51.97	127	61	0	1	381	391	517	5e-33	134	0	0	PlantCyc
21646_Transcript_3/4_Confidence_0.444_Length_487_45	487	CPC_CUCSA	137	33.59	131	54	2	43	432	3	101	7e-13	69.7	Full=Cucumber peeling cupredoxin;	Cucumis sativus (Cucumber).	Swiss-Prot
2164_Transcript_1/1_Confidence_1.000_Length_2085_45	2085	DUT_ORYSJ	171	46.32	95	50	1	1205	1486	34	128	1e-16	79.7	Full=Deoxyuridine 5'-triphosphate nucleotidohydrolase;	Oryza sativa subsp. japonica (Rice).	Swiss-Prot
21655_Transcript_1/1_Confidence_1.000_Length_412_45	412	ACT_GOSHI	377	84	100	13	1	121	411	1	100	1e-44	174	Full=Actin;	Gossypium hirsutum (Upland cotton) (Gossypium mexicanum).	Swiss-Prot
21658_Transcript_1/1_Confidence_1.000_Length_325_45	325	LOC_OS11G33030_PlantCyc_LOC_OS11G33030.1-MONOMER	347	37.08	89	48	5	309	52	53	136	1e-06	46.2	0	0	PlantCyc
21663_Transcript_1/3_Confidence_0.500_Length_457_45	457	At2g04670	1411	42.42	66	38	0	21	218	1340	1405	3e-08	55.8	[R] KOG0017 FOG: Transposon-encoded proteins with TYA, reverse transcriptase, integrase domains in various combinations		KOG
21694_Transcript_2/4_Confidence_0.500_Length_674_45	674	LOC_OS04G02754_PlantCyc_LOC_OS04G02754.1-MONOMER	434	52.7	74	34	1	450	668	172	245	5e-15	75.9	0	0	PlantCyc
21707_Transcript_1/1_Confidence_1.000_Length_219_45	219	COMT1_POPTM	365	63.41	41	15	0	96	218	23	63	7e-08	52	Full=Caffeic acid 3-O-methyltransferase 1;	Populus tremuloides (Quaking aspen).	Swiss-Prot
21716_Transcript_1/1_Confidence_1.000_Length_858_45	858	Y1686_ARATH	474	39.91	213	126	1	38	676	252	462	9e-44	173	Full=Uncharacterized membrane protein At1g16860;	Arabidopsis thaliana (Mouse-ear cress).	Swiss-Prot
21722_Transcript_1/1_Confidence_1.000_Length_771_45	771	URM1_ORYSJ	100	76.19	84	20	0	537	286	17	100	2e-34	142	Full=Ubiquitin-related modifier 1 homolog;	Oryza sativa subsp. japonica (Rice).	Swiss-Prot
21734_Transcript_1/1_Confidence_1.000_Length_301_45	301	A5BY83_VITVI	888	68.12	69	22	0	2	208	738	806	1e-13	59.7		Vitis vinifera (Grape).	TrEMBL
2173_Transcript_3/4_Confidence_0.667_Length_2522_45	2522	LHY_ARATH	645	38.62	712	349	21	340	2412	1	645	2e-86	317	Full=Protein LHY;	Arabidopsis thaliana (Mouse-ear cress).	Swiss-Prot
21766_Transcript_1/1_Confidence_1.000_Length_963_45	963	APL_ARATH	358	41.2	233	123	5	789	97	2	222	6e-26	114	Full=Myb family transcription factor APL;	Arabidopsis thaliana (Mouse-ear cress).	Swiss-Prot
21782_Transcript_1/1_Confidence_1.000_Length_219_45	219	Q75G92_ORYSJ	490	65.28	72	25	0	3	218	265	336	1e-19	95.9		Oryza sativa subsp. japonica (Rice).	TrEMBL
21786_Transcript_2/3_Confidence_0.600_Length_784_45	784	WRKY1_MAIZE	397	72.57	113	29	2	746	408	285	395	3e-38	155	Full=Protein WRKY1;	Zea mays (Maize).	Swiss-Prot
217_Transcript_2/6_Confidence_0.615_Length_1385_45	1385	CMTA2_ARATH	1050	84.55	123	19	0	382	750	14	136	5e-61	231	Full=Calmodulin-binding transcription activator 2;	Arabidopsis thaliana (Mouse-ear cress).	Swiss-Prot
21803_Transcript_1/1_Confidence_1.000_Length_1340_45	1340	BRI1_SOLPE	1207	71.85	444	118	4	3	1331	619	1056	3e-175	611	Full=Systemin receptor SR160;	Solanum peruvianum (Peruvian tomato) (Lycopersicon peruvianum).	Swiss-Prot
21814_Transcript_2/2_Confidence_1.000_Length_489_45	489	LOC_OS02G46220_PlantCyc_LOC_OS02G46220.1-MONOMER	342	35.29	136	73	4	376	2	42	173	1e-09	57	0	0	PlantCyc
2182_Transcript_3/4_Confidence_0.429_Length_766_45	766	Y3028_ARATH	443	34.44	180	110	4	629	102	11	186	7e-21	97.4	Full=Uncharacterized acetyltransferase At3g50280;	Arabidopsis thaliana (Mouse-ear cress).	Swiss-Prot
21836_Transcript_1/1_Confidence_1.000_Length_1211_45	1211	TTL1_ARATH	699	61.4	114	44	0	1200	859	434	547	3e-52	143	Full=TPR repeat-containing thioredoxin TTL1;	Arabidopsis thaliana (Mouse-ear cress).	Swiss-Prot
21837_Transcript_1/1_Confidence_1.000_Length_313_45	313	RAB7_GOSHI	207	53.4	103	5	1	3	311	2	61	2e-19	90.5	Full=Ras-related protein Rab7;	Gossypium hirsutum (Upland cotton) (Gossypium mexicanum).	Swiss-Prot
21842_Transcript_2/2_Confidence_1.000_Length_2004_45	2004	At3g03960	528	80.53	524	102	0	142	1713	2	525	0	824	[O] KOG0362 Chaperonin complex component, TCP-1 theta subunit (CCT8)		KOG
21887_Transcript_1/1_Confidence_1.000_Length_1726_45	1726	F2EEL3_HORVD	409	64.86	333	112	3	406	1395	79	409	1e-119	431		Hordeum vulgare var. distichum (Two-rowed barley).	TrEMBL
21915_Transcript_2/2_Confidence_1.000_Length_511_45	511	CSLD2_ORYSJ	1170	63.46	52	19	0	326	171	1002	1053	2e-12	67	Full=Cellulose synthase-like protein D2;	Oryza sativa subsp. japonica (Rice).	Swiss-Prot
2191_Transcript_1/2_Confidence_1.000_Length_1868_45	1868	TPSBE_ZINZE	554	65.49	455	150	3	39	1385	1	454	0	601	Full=Beta-eudesmol synthase;	Zingiber zerumbet (Shampoo ginger) (Amomum spurium).	Swiss-Prot
21938_Transcript_3/4_Confidence_0.625_Length_1176_45	1176	Hs14725791	292	34.48	232	100	5	1036	341	110	289	3e-28	124	[S] KOG3077 Uncharacterized conserved protein		KOG
21938_Transcript_4/4_Confidence_0.625_Length_1035_45	1035	Hs14725791	292	42.16	185	102	4	895	341	110	289	2e-32	138	[S] KOG3077 Uncharacterized conserved protein		KOG
21941_Transcript_1/1_Confidence_1.000_Length_316_45	316	Q9LMA6_PlantCyc_AT1G19200-MONOMER	222	50	54	26	1	241	80	157	209	7e-10	56.6	0	0	PlantCyc
21945_Transcript_1/1_Confidence_1.000_Length_414_45	414	At2g43340	241	61.73	81	21	2	1	213	106	186	4e-20	95.1	[R] KOG4197 FOG: PPR repeat		KOG
21954_Transcript_1/3_Confidence_0.667_Length_933_45	933	DOF56_ARATH	372	50.75	134	50	3	88	450	1	131	1e-32	136	Full=Dof zinc finger protein DOF5.6;	Arabidopsis thaliana (Mouse-ear cress).	Swiss-Prot
21956_Transcript_2/5_Confidence_0.667_Length_1632_45	1632	P2C67_ORYSJ	367	62.05	332	105	5	128	1105	1	317	4e-120	395	Full=Probable protein phosphatase 2C 67;	Oryza sativa subsp. japonica (Rice).	Swiss-Prot
21998_Transcript_1/2_Confidence_1.000_Length_1778_45	1778	At5g26850	907	36.1	482	210	11	1778	372	488	884	1e-60	233	[R] KOG1877 Putative transmembrane protein cmp44E		KOG
2199_Transcript_2/5_Confidence_0.692_Length_1028_45	1028	At4g22720	353	90.69	247	23	0	1028	288	94	340	1e-128	457	[O] KOG2708 Predicted metalloprotease with chaperone activity (RNAse H/HSP70 fold)		KOG
22010_Transcript_1/1_Confidence_1.000_Length_549_45	549	NIK2_ARATH	635	69.5	141	37	2	549	127	475	609	3e-50	194	Full=Protein NSP-INTERACTING KINASE 2;	Arabidopsis thaliana (Mouse-ear cress).	Swiss-Prot
2201_Transcript_1/1_Confidence_1.000_Length_1085_45	1085	Y5436_ARATH	1055	28.16	316	178	12	1085	198	760	1046	1e-10	64.3	Full=MATH domain-containing protein At5g43560;	Arabidopsis thaliana (Mouse-ear cress).	Swiss-Prot
22036_Transcript_1/1_Confidence_1.000_Length_1121_45	1121	ARIA_ARATH	710	79.07	129	27	0	717	331	293	421	6e-87	211	Full=ARM REPEAT PROTEIN INTERACTING WITH ABF2;	Arabidopsis thaliana (Mouse-ear cress).	Swiss-Prot
22043_Transcript_1/1_Confidence_1.000_Length_429_45	429	PX11C_ARATH	235	74.47	141	36	0	427	5	47	187	4e-46	179	Full=Peroxisomal membrane protein 11C;	Arabidopsis thaliana (Mouse-ear cress).	Swiss-Prot
22046_Transcript_2/2_Confidence_1.000_Length_494_45	494	DRTS_ORYSJ	494	72.67	161	44	0	492	10	7	167	1e-72	268	Full=Putative bifunctional dihydrofolate reductase-thymidylate synthase;	Oryza sativa subsp. japonica (Rice).	Swiss-Prot
2204_Transcript_1/1_Confidence_1.000_Length_2345_45	2345	LOC_OS09G28570_PlantCyc_LOC_OS09G28570.1-MONOMER	634	71.61	634	177	3	2157	265	1	634	0	921	0	0	PlantCyc
22071_Transcript_1/1_Confidence_1.000_Length_270_45	270	CSLA9_ARATH	533	78.65	89	19	0	3	269	93	181	2e-38	153	Full=Glucomannan 4-beta-mannosyltransferase 9;	Arabidopsis thaliana (Mouse-ear cress).	Swiss-Prot
2207_Transcript_4/5_Confidence_0.455_Length_2829_45	2829	C5XZJ4_SORBI	598	35.81	363	212	9	247	1320	8	354	3e-42	175		Sorghum bicolor (Sorghum) (Sorghum vulgare).	TrEMBL
22082_Transcript_1/1_Confidence_1.000_Length_511_45	511	YSL2_ORYSJ	674	74.14	58	15	0	1	174	617	674	6e-22	100	Full=Metal-nicotianamine transporter YSL2;	Oryza sativa subsp. japonica (Rice).	Swiss-Prot
22094_Transcript_1/1_Confidence_1.000_Length_231_45	231	PP188_ARATH	501	56	75	33	0	227	3	368	442	2e-22	100	Full=Pentatricopeptide repeat-containing protein At2g36730;	Arabidopsis thaliana (Mouse-ear cress).	Swiss-Prot
220_Transcript_4/10_Confidence_0.214_Length_1322_45	1322	CE01921	838	77.65	528	15	3	1	1320	188	700	0	751	[OR] KOG0001 Ubiquitin and ubiquitin-like proteins		KOG
220_Transcript_5/10_Confidence_0.286_Length_1259_45	1259	UBQ10_ARATH	457	90.91	396	0	1	178	1257	1	396	0	677	Full=Polyubiquitin 10;	Arabidopsis thaliana (Mouse-ear cress).	Swiss-Prot
220_Transcript_8/10_Confidence_0.071_Length_1452_45	1452	UBIQP_AVEFA	305	99.67	305	1	0	317	1231	1	305	1e-168	589	Full=Polyubiquitin;	Avena fatua (Wild oats).	Swiss-Prot
22103_Transcript_1/2_Confidence_1.000_Length_656_45	656	Q94FG6_HORVU	171	78.11	169	35	2	638	138	1	169	1e-73	276		Hordeum vulgare (Barley).	TrEMBL
22107_Transcript_1/1_Confidence_1.000_Length_347_45	347	B9FNQ1_ORYSJ	290	67.92	53	17	0	1	159	238	290	1e-15	83.2		Oryza sativa subsp. japonica (Rice).	TrEMBL
22118_Transcript_1/1_Confidence_1.000_Length_300_45	300	LOC_OS01G43020_PlantCyc_LOC_OS01G43020.1-MONOMER	605	46.34	82	39	2	2	232	523	604	1e-13	69.3	0	0	PlantCyc
2212_Transcript_1/2_Confidence_1.000_Length_2450_45	2450	At3g01750	664	48.01	677	306	17	2274	316	1	655	3e-150	531	[R] KOG0504 FOG: Ankyrin repeat		KOG
22143_Transcript_2/3_Confidence_0.667_Length_2839_45	2839	At5g66960	792	61.48	553	205	5	81	1724	49	598	0	699	[O] KOG2237 Predicted serine protease		KOG
2214_Transcript_1/3_Confidence_0.429_Length_714_45	714	TRL33_ORYSJ	129	75.42	118	29	0	588	235	12	129	5e-50	194	Full=Thioredoxin-like 3-3;	Oryza sativa subsp. japonica (Rice).	Swiss-Prot
22151_Transcript_1/2_Confidence_1.000_Length_856_45	856	LOC_OS03G19760_PlantCyc_LOC_OS03G19760.1-MONOMER	1064	82.31	147	26	0	561	121	156	302	6e-56	212	0	0	PlantCyc
22171_Transcript_1/1_Confidence_1.000_Length_616_45	616	ESCA_ARATH	311	35.25	122	67	2	32	370	116	234	4e-10	61.2	Full=Putative DNA-binding protein ESCAROLA;	Arabidopsis thaliana (Mouse-ear cress).	Swiss-Prot
22172_Transcript_1/1_Confidence_1.000_Length_542_45	542	ROGF1_ARATH	548	73.68	152	40	0	469	14	87	238	4e-63	236	Full=Rop guanine nucleotide exchange factor 1;	Arabidopsis thaliana (Mouse-ear cress).	Swiss-Prot
22175_Transcript_1/1_Confidence_1.000_Length_320_45	320	BT1_MAIZE	436	80.95	42	8	0	320	195	377	418	3e-16	79.7	Full=Protein brittle-1, chloroplastic/amyloplastic;	Zea mays (Maize).	Swiss-Prot
22181_Transcript_1/1_Confidence_1.000_Length_767_45	767	G0Y6T3_ARAHY	562	49.15	59	30	0	559	735	403	461	4e-12	67		Arachis hypogaea (Peanut).	TrEMBL
22185_Transcript_1/1_Confidence_1.000_Length_466_45	466	Q0J4N9_ORYSJ	617	48	50	26	0	442	293	62	111	3e-07	55.1		Oryza sativa subsp. japonica (Rice).	TrEMBL
22195_Transcript_1/1_Confidence_1.000_Length_361_45	361	RL10_VITRI	220	81.08	74	14	0	3	224	145	218	2e-33	137	Full=60S ribosomal protein L10;	Vitis riparia (Frost grape) (Vitis vulpina).	Swiss-Prot
2219_Transcript_1/2_Confidence_1.000_Length_1974_45	1974	UBP24_ARATH	551	52.08	553	242	11	1888	293	1	551	3e-139	492	Full=Ubiquitin carboxyl-terminal hydrolase 24;	Arabidopsis thaliana (Mouse-ear cress).	Swiss-Prot
22204_Transcript_1/1_Confidence_1.000_Length_345_45	345	PPR77_ARATH	819	45.13	113	62	0	340	2	336	448	4e-24	105	Full=Pentatricopeptide repeat-containing protein At1g52620;	Arabidopsis thaliana (Mouse-ear cress).	Swiss-Prot
22208_Transcript_2/3_Confidence_0.400_Length_387_45	387	B9H8D0_POPTR	375	42.11	95	49	3	10	288	264	354	3e-07	55.1		Populus trichocarpa (Western balsam poplar) (Populus balsamifera subsp. trichocarpa).	TrEMBL
2220_Transcript_1/1_Confidence_1.000_Length_1224_45	1224	At5g01230	287	83.22	304	29	1	86	997	1	282	9e-145	511	[DR] KOG1099 SAM-dependent methyltransferase/cell division protein FtsJ		KOG
22217_Transcript_1/2_Confidence_1.000_Length_828_45	828	At2g18400	144	82.61	92	16	0	498	223	44	135	2e-40	164	[J] KOG3254 Mitochondrial/chloroplast ribosomal protein L6		KOG
22233_Transcript_1/1_Confidence_1.000_Length_858_45	858	C5WVF7_SORBI	924	39.5	119	46	2	757	407	755	849	3e-23	81.3		Sorghum bicolor (Sorghum) (Sorghum vulgare).	TrEMBL
22242_Transcript_1/1_Confidence_1.000_Length_368_45	368	C0JAF3_9ORYZ	593	36.36	132	60	4	1	366	470	587	6e-10	63.9		Oryza granulata.	TrEMBL
22258_Transcript_2/3_Confidence_0.667_Length_1292_45	1292	ANM62_ORYSJ	395	69.14	350	104	2	1292	243	50	395	3e-142	501	Full=Probable protein arginine N-methyltransferase 6.2;	Oryza sativa subsp. japonica (Rice).	Swiss-Prot
22259_Transcript_1/1_Confidence_1.000_Length_728_45	728	C5XSJ6_SORBI	1047	34.53	139	85	3	690	274	915	1047	1e-10	67.8		Sorghum bicolor (Sorghum) (Sorghum vulgare).	TrEMBL
2226_Transcript_1/2_Confidence_1.000_Length_2594_45	2594	NOG1_ARATH	671	73.21	683	168	6	293	2332	1	671	0	904	Full=Nucleolar GTP-binding protein 1;	Arabidopsis thaliana (Mouse-ear cress).	Swiss-Prot
22272_Transcript_1/1_Confidence_1.000_Length_480_45	480	F2DPB9_HORVD	452	57.47	87	37	0	6	266	366	452	4e-26	118		Hordeum vulgare var. distichum (Two-rowed barley).	TrEMBL
22273_Transcript_1/1_Confidence_1.000_Length_992_45	992	Y4744_ARATH	404	51.3	269	121	3	812	15	49	310	9e-78	286	Full=Uncharacterized protein At4g06744;	Arabidopsis thaliana (Mouse-ear cress).	Swiss-Prot
22284_Transcript_1/1_Confidence_1.000_Length_475_45	475	ETFB_ORYSJ	253	93.1	29	2	0	389	475	122	150	2e-10	61.6	Full=Electron transfer flavoprotein subunit beta, mitochondrial;	Oryza sativa subsp. japonica (Rice).	Swiss-Prot
22288_Transcript_1/1_Confidence_1.000_Length_274_45	274	LOC_OS06G41090_PlantCyc_LOC_OS06G41090.1-MONOMER	824	41.25	80	40	2	37	267	258	333	3e-11	61.2	0	0	PlantCyc
22289_Transcript_2/2_Confidence_1.000_Length_410_45	410	DCL1_ORYSJ	1883	44.44	72	36	3	281	78	1812	1883	1e-07	52	Full=Endoribonuclease Dicer homolog 1;	Oryza sativa subsp. japonica (Rice).	Swiss-Prot
22304_Transcript_1/1_Confidence_1.000_Length_393_45	393	At1g32790	358	93.75	48	3	0	3	146	311	358	3e-19	92	[R] KOG0118 FOG: RRM domain		KOG
22314_Transcript_1/2_Confidence_1.000_Length_1544_45	1544	LOC_OS05G03480_PlantCyc_LOC_OS05G03480.1-MONOMER	410	86.5	400	52	2	86	1279	11	410	0	673	0	0	PlantCyc
2231_Transcript_2/2_Confidence_1.000_Length_1388_45	1388	At1g32490	1038	53.59	474	188	4	5	1387	6	460	1e-125	448	[A] KOG0923 mRNA splicing factor ATP-dependent RNA helicase		KOG
22330_Transcript_1/1_Confidence_1.000_Length_346_45	346	At5g15140	490	56.44	101	44	0	305	3	157	257	1e-28	122	[G] KOG1604 Predicted mutarotase		KOG
22334_Transcript_1/1_Confidence_1.000_Length_648_45	648	BH030_ARATH	368	38.71	186	105	3	66	608	169	350	9e-32	133	Full=Transcription factor bHLH30;	Arabidopsis thaliana (Mouse-ear cress).	Swiss-Prot
22351_Transcript_1/1_Confidence_1.000_Length_228_45	228	E4Z8N8_MALDO	622	54	50	22	1	1	147	310	359	4e-11	50.1		Malus domestica (Apple) (Pyrus malus).	TrEMBL
22365_Transcript_1/2_Confidence_1.000_Length_1921_45	1921	At5g63860	440	75.12	418	100	1	278	1531	1	414	0	647	[S] KOG1426 FOG: RCC1 domain		KOG
22367_Transcript_1/1_Confidence_1.000_Length_767_45	767	At5g27690	352	60.26	78	31	0	1	234	21	98	3e-22	103	[P] KOG1603 Copper chaperone		KOG
2236_Transcript_3/4_Confidence_0.667_Length_1996_45	1996	At3g14630	508	56.95	295	115	2	1023	139	226	508	5e-91	334	[QI] KOG0157 Cytochrome P450 CYP4/CYP19/CYP26 subfamilies		KOG
22374_Transcript_1/1_Confidence_1.000_Length_1107_45	1107	PPR80_ARATH	717	51.76	369	177	1	1106	3	180	548	5e-104	374	Full=Pentatricopeptide repeat-containing protein At1g53600, mitochondrial;	Arabidopsis thaliana (Mouse-ear cress).	Swiss-Prot
2237_Transcript_1/2_Confidence_1.000_Length_985_45	985	RH18_ORYSJ	647	70.62	194	56	1	983	405	209	402	2e-74	276	Full=DEAD-box ATP-dependent RNA helicase 18;	Oryza sativa subsp. japonica (Rice).	Swiss-Prot
22400_Transcript_3/3_Confidence_0.667_Length_1459_45	1459	At2g27280	764	46.39	319	138	5	169	1050	1	311	1e-66	253	[S] KOG2117 Uncharacterized conserved protein		KOG
22404_Transcript_1/1_Confidence_1.000_Length_366_45	366	VIT11_ORYSJ	252	74.19	62	16	0	2	187	170	231	4e-22	99.4	Full=Vacuolar iron transporter 1.1;	Oryza sativa subsp. japonica (Rice).	Swiss-Prot
2242_Transcript_1/2_Confidence_1.000_Length_2219_45	2219	At5g57210	737	44.41	743	324	16	157	2157	4	733	4e-131	467	[U] KOG1091 Ypt/Rab-specific GTPase-activating protein GYP6		KOG
22435_Transcript_1/1_Confidence_1.000_Length_598_45	598	BAME3_ARATH	992	52.2	205	91	5	598	2	52	255	2e-52	201	Full=Leucine-rich repeat receptor-like serine/threonine-protein kinase BAM3;	Arabidopsis thaliana (Mouse-ear cress).	Swiss-Prot
22437_Transcript_1/1_Confidence_1.000_Length_264_45	264	C5XYW9_SORBI	152	50.77	65	25	1	1	174	64	128	4e-10	64.7		Sorghum bicolor (Sorghum) (Sorghum vulgare).	TrEMBL
22450_Transcript_2/2_Confidence_1.000_Length_648_45	648	UBP13_ARATH	1115	77.17	127	6	1	266	646	194	297	3e-50	194	Full=Ubiquitin carboxyl-terminal hydrolase 13;	Arabidopsis thaliana (Mouse-ear cress).	Swiss-Prot
22451_Transcript_1/2_Confidence_1.000_Length_604_45	604	BH110_ARATH	453	67.83	115	35	1	457	119	318	432	1e-38	155	Full=Transcription factor bHLH110;	Arabidopsis thaliana (Mouse-ear cress).	Swiss-Prot
22465_Transcript_1/3_Confidence_0.333_Length_342_45	342	At3g60400	558	47.56	82	43	0	96	341	470	551	1e-15	80.1	[KR] KOG1267 Mitochondrial transcription termination factor, mTERF		KOG
22468_Transcript_1/1_Confidence_1.000_Length_516_45	516	A5AFZ5_VITVI	1217	61.83	131	50	0	122	514	6	136	1e-43	176		Vitis vinifera (Grape).	TrEMBL
22470_Transcript_4/4_Confidence_0.667_Length_1840_45	1840	WDR69_CHLRE	446	26.35	148	107	2	992	1432	96	242	6e-10	62.8	Full=Outer row dynein assembly protein 16;	Chlamydomonas reinhardtii (Chlamydomonas smithii).	Swiss-Prot
2248_Transcript_1/2_Confidence_1.000_Length_836_45	836	A9PBC1_POPTR	286	45.87	218	117	1	751	98	69	285	5e-40	166		Populus trichocarpa (Western balsam poplar) (Populus balsamifera subsp. trichocarpa).	TrEMBL
2249_Transcript_1/2_Confidence_1.000_Length_798_45	798	LOC_OS04G42690_PlantCyc_LOC_OS04G42690.1-MONOMER	485	49.01	253	121	3	764	9	6	251	8e-66	244	0	0	PlantCyc
224_Transcript_3/6_Confidence_0.423_Length_2534_45	2534	At2g34250	475	93.39	242	16	0	1551	2276	233	474	7e-127	453	[UO] KOG1373 Transport protein Sec61, alpha subunit		KOG
22502_Transcript_1/1_Confidence_1.000_Length_813_45	813	ETR2_ARATH	773	38.06	289	159	7	2	811	391	678	2e-38	155	Full=Ethylene receptor 2;	Arabidopsis thaliana (Mouse-ear cress).	Swiss-Prot
22515_Transcript_1/1_Confidence_1.000_Length_249_45	249	At1g44510	1459	48.65	74	38	0	249	28	684	757	2e-15	79	[R] KOG0017 FOG: Transposon-encoded proteins with TYA, reverse transcriptase, integrase domains in various combinations		KOG
22525_Transcript_1/1_Confidence_1.000_Length_475_45	475	PP2A_TOBAC	312	100	21	0	0	65	3	109	129	8e-06	46.2	Full=Serine/threonine-protein phosphatase PP2A catalytic subunit;	Nicotiana tabacum (Common tobacco).	Swiss-Prot
22532_Transcript_1/1_Confidence_1.000_Length_286_45	286	F2D5Y6_HORVD	303	76.79	56	13	0	187	20	20	75	5e-20	97.4		Hordeum vulgare var. distichum (Two-rowed barley).	TrEMBL
22555_Transcript_1/1_Confidence_1.000_Length_527_45	527	ERFL1_ARATH	226	71.93	57	16	0	427	257	99	155	2e-18	88.6	Full=Ethylene-responsive transcription factor-like protein At4g13040;	Arabidopsis thaliana (Mouse-ear cress).	Swiss-Prot
22560_Transcript_1/1_Confidence_1.000_Length_281_45	281	B6TZD9_MAIZE	527	40.91	88	42	3	1	240	156	241	5e-09	60.8		Zea mays (Maize).	TrEMBL
2259_Transcript_6/6_Confidence_0.545_Length_2179_45	2179	CAP8_ARATH	571	62.37	574	183	6	2052	364	1	552	3e-167	585	Full=Putative clathrin assembly protein At2g01600;	Arabidopsis thaliana (Mouse-ear cress).	Swiss-Prot
22600_Transcript_1/1_Confidence_1.000_Length_230_45	230	Q6H599_ORYSJ	208	75	44	11	0	98	229	1	44	6e-13	73.9		Oryza sativa subsp. japonica (Rice).	TrEMBL
22621_Transcript_1/1_Confidence_1.000_Length_346_45	346	C5WUU5_SORBI	197	66.67	27	9	0	168	248	4	30	7e-06	50.4		Sorghum bicolor (Sorghum) (Sorghum vulgare).	TrEMBL
22645_Transcript_1/1_Confidence_1.000_Length_408_45	408	At2g32580	175	75.61	41	10	0	1	123	119	159	7e-08	54.3	[V] KOG1823 DRIM (Down-regulated in metastasis)-like proteins		KOG
22669_Transcript_1/1_Confidence_1.000_Length_241_45	241	D7UDA8_VITVI	565	40.85	71	41	1	1	213	143	212	2e-09	62		Vitis vinifera (Grape).	TrEMBL
2266_Transcript_1/1_Confidence_1.000_Length_309_45	309	F6HL86_VITVI	516	50	34	17	0	108	7	138	171	7e-06	50.4		Vitis vinifera (Grape).	TrEMBL
2267_Transcript_2/3_Confidence_0.714_Length_890_45	890	AP1S2_ARATH	162	92.68	41	3	0	456	334	98	138	2e-15	79.7	Full=AP-1 complex subunit sigma-2;	Arabidopsis thaliana (Mouse-ear cress).	Swiss-Prot
2268_Transcript_9/10_Confidence_0.655_Length_3999_45	3999	At2g06950	1402	35.3	1272	683	20	452	3997	9	1230	0	709	[R] KOG0017 FOG: Transposon-encoded proteins with TYA, reverse transcriptase, integrase domains in various combinations		KOG
2269_Transcript_1/1_Confidence_1.000_Length_2521_45	2521	R13L1_ARATH	1054	32.69	670	390	24	11	1927	70	709	7e-81	298	Full=Putative disease resistance RPP13-like protein 1;	Arabidopsis thaliana (Mouse-ear cress).	Swiss-Prot
2270_Transcript_6/8_Confidence_0.400_Length_1842_45	1842	ORP3C_ARATH	457	69.9	485	95	2	171	1622	23	457	0	717	Full=Oxysterol-binding protein-related protein 3C;	Arabidopsis thaliana (Mouse-ear cress).	Swiss-Prot
22716_Transcript_1/1_Confidence_1.000_Length_662_45	662	At3g13180	515	72.46	138	38	0	3	416	335	472	3e-53	206	[A] KOG1122 tRNA and rRNA cytosine-C5-methylase (nucleolar protein NOL1/NOP2)		KOG
22729_Transcript_1/1_Confidence_1.000_Length_259_45	259	AGO6_ARATH	878	55.81	86	37	1	259	2	284	368	6e-24	105	Full=Protein argonaute 6;	Arabidopsis thaliana (Mouse-ear cress).	Swiss-Prot
22751_Transcript_1/1_Confidence_1.000_Length_634_45	634	Q0E476_ORYSJ	163	70	40	12	0	120	1	23	62	1e-08	60.8		Oryza sativa subsp. japonica (Rice).	TrEMBL
22776_Transcript_1/1_Confidence_1.000_Length_677_45	677	D7T2D2_VITVI	280	35.94	192	103	4	554	33	21	210	8e-21	101		Vitis vinifera (Grape).	TrEMBL
22793_Transcript_1/1_Confidence_1.000_Length_1479_45	1479	At5g05830	204	65.03	143	44	1	986	1396	60	202	1e-38	159	[A] KOG1609 Protein involved in mRNA turnover and stability		KOG
22802_Transcript_1/1_Confidence_1.000_Length_425_45	425	B9THB7_RICCO	53	77.78	54	11	1	190	29	1	53	1e-14	79.3		Ricinus communis (Castor bean).	TrEMBL
22809_Transcript_1/1_Confidence_1.000_Length_220_45	220	SWET4_ORYSJ	259	68.57	35	11	0	116	220	1	35	1e-08	54.7	Full=Bidirectional sugar transporter SWEET4;	Oryza sativa subsp. japonica (Rice).	Swiss-Prot
2280_Transcript_4/4_Confidence_0.571_Length_1044_45	1044	RK17_ARATH	211	81.94	155	27	1	196	657	57	211	5e-67	251	Full=50S ribosomal protein L17, chloroplastic;	Arabidopsis thaliana (Mouse-ear cress).	Swiss-Prot
2281_Transcript_1/2_Confidence_1.000_Length_1677_45	1677	AI5L5_ARATH	416	48.89	407	177	10	355	1497	15	416	6e-59	225	Full=ABSCISIC ACID-INSENSITIVE 5-like protein 5;	Arabidopsis thaliana (Mouse-ear cress).	Swiss-Prot
22824_Transcript_1/1_Confidence_1.000_Length_251_45	251	Q9SAA5_PlantCyc_AT1G11720-MONOMER	1025	60.23	88	28	1	244	2	391	478	1e-26	112	transferase, transferring glycosyl groups//starch synthase	Arabidopsis thaliana	PlantCyc
22829_Transcript_1/1_Confidence_1.000_Length_834_45	834	LOC_OS03G50450_PlantCyc_LOC_OS03G50450.1-MONOMER	686	64.86	185	62	2	829	284	480	664	3e-60	226	0	0	PlantCyc
2282_Transcript_1/2_Confidence_1.000_Length_8638_45	8638	UPL1_ARATH	3681	50.07	1356	602	24	4297	368	2349	3675	0	1052	Full=E3 ubiquitin-protein ligase UPL1;	Arabidopsis thaliana (Mouse-ear cress).	Swiss-Prot
22842_Transcript_1/1_Confidence_1.000_Length_406_45	406	CAB6_ARATH	241	93.55	93	6	0	406	128	147	239	1e-47	184	Full=Chlorophyll a-b binding protein 6, chloroplastic;	Arabidopsis thaliana (Mouse-ear cress).	Swiss-Prot
22856_Transcript_1/1_Confidence_1.000_Length_230_45	230	E1314_ARATH	392	68.09	47	15	0	5	145	300	346	3e-14	73.2	Full=Glucan endo-1,3-beta-glucosidase 14;	Arabidopsis thaliana (Mouse-ear cress).	Swiss-Prot
22890_Transcript_1/1_Confidence_1.000_Length_315_45	315	AFC1_ARATH	467	74.19	31	8	0	232	140	415	445	4e-08	52.8	Full=Serine/threonine-protein kinase AFC1;	Arabidopsis thaliana (Mouse-ear cress).	Swiss-Prot
22891_Transcript_1/3_Confidence_0.667_Length_481_45	481	At5g65260	220	76.67	60	14	0	481	302	123	182	6e-19	91.7	[A] KOG4209 Splicing factor RNPS1, SR protein superfamily		KOG
22897_Transcript_1/1_Confidence_1.000_Length_214_45	214	F2E992_HORVD	1543	41.43	70	31	1	212	33	390	459	4e-07	54.7		Hordeum vulgare var. distichum (Two-rowed barley).	TrEMBL
22899_Transcript_1/1_Confidence_1.000_Length_251_45	251	BH078_ARATH	498	59.49	79	24	1	13	249	261	331	2e-19	90.5	Full=Transcription factor bHLH78;	Arabidopsis thaliana (Mouse-ear cress).	Swiss-Prot
22908_Transcript_1/1_Confidence_1.000_Length_526_45	526	LOC_OS03G46910_PlantCyc_LOC_OS03G46910.1-MONOMER	548	69.59	171	52	0	516	4	172	342	2e-65	242	0	0	PlantCyc
2291_Transcript_10/10_Confidence_0.400_Length_1287_45	1287	SAPK6_ORYSJ	365	54.84	62	26	1	408	587	216	277	4e-13	72.8	Full=Serine/threonine-protein kinase SAPK6;	Oryza sativa subsp. japonica (Rice).	Swiss-Prot
2291_Transcript_2/10_Confidence_0.400_Length_1202_45	1202	SRK2H_ARATH	360	48.53	68	33	1	399	596	213	280	3e-13	70.5	Full=Serine/threonine-protein kinase SRK2H;	Arabidopsis thaliana (Mouse-ear cress).	Swiss-Prot
22923_Transcript_1/1_Confidence_1.000_Length_463_45	463	WAK4_ARATH	738	48.78	41	18	1	339	452	255	295	6e-06	46.6	Full=Wall-associated receptor kinase 4;	Arabidopsis thaliana (Mouse-ear cress).	Swiss-Prot
22926_Transcript_1/1_Confidence_1.000_Length_548_45	548	At2g39890	442	79.63	54	11	0	386	547	26	79	4e-20	95.9	[E] KOG1303 Amino acid transporters		KOG
2292_Transcript_1/3_Confidence_0.714_Length_2041_45	2041	BH078_ARATH	498	37.07	437	221	16	417	1655	87	493	8e-51	198	Full=Transcription factor bHLH78;	Arabidopsis thaliana (Mouse-ear cress).	Swiss-Prot
22941_Transcript_1/1_Confidence_1.000_Length_707_45	707	C5X6S0_SORBI	1084	31.58	171	113	2	86	586	521	691	3e-13	76.6		Sorghum bicolor (Sorghum) (Sorghum vulgare).	TrEMBL
22942_Transcript_3/3_Confidence_0.714_Length_991_45	991	B9SNE9_RICCO	324	46.81	94	45	3	829	560	23	115	8e-14	79.3		Ricinus communis (Castor bean).	TrEMBL
22946_Transcript_2/2_Confidence_1.000_Length_1925_45	1925	ZDH17_ARATH	718	61.05	344	94	4	914	3	16	359	2e-110	396	Full=Probable S-acyltransferase At4g15080;	Arabidopsis thaliana (Mouse-ear cress).	Swiss-Prot
2294_Transcript_1/1_Confidence_1.000_Length_1250_45	1250	SPD1_ORYSJ	323	85	300	45	0	80	979	24	323	1e-148	523	Full=Spermidine synthase 1;	Oryza sativa subsp. japonica (Rice).	Swiss-Prot
22982_Transcript_1/1_Confidence_1.000_Length_265_45	265	PPR9_ARATH	660	79.31	87	17	1	6	263	488	574	1e-34	140	Full=Pentatricopeptide repeat-containing protein At1g03560, mitochondrial;	Arabidopsis thaliana (Mouse-ear cress).	Swiss-Prot
22983_Transcript_1/1_Confidence_1.000_Length_476_45	476	At1g79910	389	48.98	98	50	0	14	307	70	167	1e-23	107	[Z] KOG2027 Spindle pole body protein		KOG
22991_Transcript_1/1_Confidence_1.000_Length_660_45	660	Q7XX19_ORYSJ	948	46.97	66	33	1	329	138	695	760	3e-14	57		Oryza sativa subsp. japonica (Rice).	TrEMBL
229_Transcript_2/8_Confidence_0.682_Length_2406_45	2406	At3g13670	703	76.64	535	121	2	2364	766	90	622	0	870	[T] KOG1164 Casein kinase (serine/threonine/tyrosine protein kinase)		KOG
2300_Transcript_2/4_Confidence_0.667_Length_1570_45	1570	At5g58490	324	67.61	176	57	0	1570	1043	40	215	3e-61	234	[V] KOG1502 Flavonol reductase/cinnamoyl-CoA reductase		KOG
23019_Transcript_1/1_Confidence_1.000_Length_812_45	812	PP328_ARATH	727	58.65	266	109	1	15	812	151	415	3e-84	308	Full=Pentatricopeptide repeat-containing protein At4g20740;	Arabidopsis thaliana (Mouse-ear cress).	Swiss-Prot
23022_Transcript_2/2_Confidence_1.000_Length_419_45	419	Y1491_ARATH	519	50.49	103	50	1	17	322	60	162	3e-24	107	Full=DUF246 domain-containing protein At1g04910;	Arabidopsis thaliana (Mouse-ear cress).	Swiss-Prot
23026_Transcript_1/1_Confidence_1.000_Length_361_45	361	G7KEW1_MEDTR	669	39.36	94	55	1	35	316	532	623	5e-09	60.8		Medicago truncatula (Barrel medic) (Medicago tribuloides).	TrEMBL
23037_Transcript_1/1_Confidence_1.000_Length_278_45	278	BAME3_ARATH	992	64.13	92	33	0	278	3	481	572	5e-31	129	Full=Leucine-rich repeat receptor-like serine/threonine-protein kinase BAM3;	Arabidopsis thaliana (Mouse-ear cress).	Swiss-Prot
23041_Transcript_1/1_Confidence_1.000_Length_288_45	288	C4J960_MAIZE	505	51.46	103	35	4	286	5	66	162	5e-17	87.4		Zea mays (Maize).	TrEMBL
23042_Transcript_1/1_Confidence_1.000_Length_1234_45	1234	Q8GWG2_PlantCyc_AT4G39770-MONOMER	349	67.64	309	87	3	14	925	45	345	8e-119	421	trehalose-phosphatase	Arabidopsis thaliana	PlantCyc
23047_Transcript_1/1_Confidence_1.000_Length_410_45	410	At4g31890	518	69.77	43	13	0	407	279	476	518	6e-10	61.2	[S] KOG0167 FOG: Armadillo/beta-catenin-like repeats		KOG
23061_Transcript_1/2_Confidence_1.000_Length_902_45	902	F2D457_HORVD	227	59.46	222	77	2	902	237	18	226	1e-69	264		Hordeum vulgare var. distichum (Two-rowed barley).	TrEMBL
2306_Transcript_1/1_Confidence_1.000_Length_2213_45	2213	At4g16830	355	47.11	121	57	4	1643	2005	242	355	8e-12	71.2	[R] KOG2945 Predicted RNA-binding protein		KOG
23070_Transcript_2/3_Confidence_0.500_Length_698_45	698	At5g61030	309	71.62	74	21	0	58	279	31	104	1e-25	115	[R] KOG0118 FOG: RRM domain		KOG
23084_Transcript_1/1_Confidence_1.000_Length_1175_45	1175	At5g24580	319	48.77	285	124	5	208	1053	54	319	1e-50	199	[P] KOG1603 Copper chaperone		KOG
23087_Transcript_1/2_Confidence_1.000_Length_1122_45	1122	At1g17640	369	52.7	241	96	4	229	927	19	249	3e-63	241	[R] KOG0118 FOG: RRM domain		KOG
23089_Transcript_1/1_Confidence_1.000_Length_398_45	398	Y1461_ARATH	572	82.76	29	5	0	100	186	406	434	3e-09	57	Full=Probable serine/threonine-protein kinase At1g54610;	Arabidopsis thaliana (Mouse-ear cress).	Swiss-Prot
23093_Transcript_1/1_Confidence_1.000_Length_314_45	314	D7MVP6_ARALL	557	70.19	104	31	0	313	2	282	385	4e-40	164		Arabidopsis lyrata subsp. lyrata (Lyre-leaved rock-cress).	TrEMBL
23094_Transcript_1/1_Confidence_1.000_Length_696_45	696	At2g31080	1231	32.77	235	149	7	695	18	617	851	2e-28	124	[R] KOG1075 FOG: Reverse transcriptase		KOG
23107_Transcript_1/1_Confidence_1.000_Length_268_45	268	D7SQC5_VITVI	186	68	75	22	1	48	266	30	104	6e-19	94		Vitis vinifera (Grape).	TrEMBL
2310_Transcript_1/1_Confidence_1.000_Length_1964_45	1964	PMTD_ARATH	600	70.97	558	145	4	12	1679	57	599	0	836	Full=Probable methyltransferase PMT13;	Arabidopsis thaliana (Mouse-ear cress).	Swiss-Prot
23111_Transcript_1/1_Confidence_1.000_Length_264_45	264	PPR88_ARATH	656	55.29	85	38	0	6	260	303	387	4e-23	102	Full=Pentatricopeptide repeat-containing protein At1g62260, mitochondrial;	Arabidopsis thaliana (Mouse-ear cress).	Swiss-Prot
23119_Transcript_1/1_Confidence_1.000_Length_327_45	327	C5YLS7_SORBI	805	68.25	63	17	1	227	39	31	90	5e-18	90.9		Sorghum bicolor (Sorghum) (Sorghum vulgare).	TrEMBL
2311_Transcript_1/1_Confidence_1.000_Length_1231_45	1231	RPS2_ARATH	909	32.4	321	193	9	1228	305	583	892	1e-25	114	Full=Disease resistance protein RPS2;	Arabidopsis thaliana (Mouse-ear cress).	Swiss-Prot
23143_Transcript_1/2_Confidence_1.000_Length_683_45	683	GRXS7_ORYSJ	168	73.04	115	31	0	247	591	54	168	8e-47	183	Full=Monothiol glutaredoxin-S7, chloroplastic;	Oryza sativa subsp. japonica (Rice).	Swiss-Prot
2314_Transcript_1/3_Confidence_0.667_Length_651_45	651	MSBP2_ARATH	233	70.71	140	37	1	647	228	60	195	6e-50	193	Full=Membrane steroid-binding protein 2;	Arabidopsis thaliana (Mouse-ear cress).	Swiss-Prot
23160_Transcript_1/1_Confidence_1.000_Length_259_45	259	SUBL_ARATH	757	62.79	86	32	0	258	1	239	324	4e-19	89.4	Full=Subtilisin-like protease;	Arabidopsis thaliana (Mouse-ear cress).	Swiss-Prot
23170_Transcript_1/1_Confidence_1.000_Length_926_45	926	F6HYR2_VITVI	546	38.58	197	109	4	307	879	353	543	1e-26	121		Vitis vinifera (Grape).	TrEMBL
23178_Transcript_1/1_Confidence_1.000_Length_201_45	201	PP425_ARATH	646	58.21	67	28	0	1	201	548	614	6e-19	89	Full=Pentatricopeptide repeat-containing protein At5g48910;	Arabidopsis thaliana (Mouse-ear cress).	Swiss-Prot
23182_Transcript_1/1_Confidence_1.000_Length_427_45	427	F6HAL0_VITVI	762	52.24	134	45	3	2	382	138	259	1e-25	116		Vitis vinifera (Grape).	TrEMBL
23188_Transcript_1/1_Confidence_1.000_Length_499_45	499	KSG4_ARATH	420	64.29	42	15	0	3	128	365	406	5e-10	60.5	Full=Shaggy-related protein kinase delta;	Arabidopsis thaliana (Mouse-ear cress).	Swiss-Prot
23197_Transcript_1/2_Confidence_1.000_Length_427_45	427	WRK65_ARATH	259	75	44	11	0	153	22	92	135	5e-29	82	Full=Probable WRKY transcription factor 65;	Arabidopsis thaliana (Mouse-ear cress).	Swiss-Prot
231_Transcript_1/1_Confidence_1.000_Length_551_45	551	UBQ4_ARATH	382	100	116	0	0	3	350	29	144	4e-61	230	Full=Polyubiquitin 4;	Arabidopsis thaliana (Mouse-ear cress).	Swiss-Prot
23200_Transcript_1/1_Confidence_1.000_Length_204_45	204	C5I499_9ROSI	339	68.66	67	21	0	202	2	63	129	2e-20	98.6		Turnera subulata.	TrEMBL
23210_Transcript_1/1_Confidence_1.000_Length_356_45	356	MAKR2_ARATH	411	65.22	46	16	0	9	146	361	406	4e-10	59.7	Full=Probable membrane-associated kinase regulator 2;	Arabidopsis thaliana (Mouse-ear cress).	Swiss-Prot
23216_Transcript_1/1_Confidence_1.000_Length_526_45	526	SCP45_ARATH	461	79.43	175	36	0	525	1	285	459	6e-81	296	Full=Serine carboxypeptidase-like 45;	Arabidopsis thaliana (Mouse-ear cress).	Swiss-Prot
23227_Transcript_1/1_Confidence_1.000_Length_505_45	505	G0Y6W1_ARAHY	1939	55	80	34	1	394	155	504	581	2e-26	92		Arachis hypogaea (Peanut).	TrEMBL
23232_Transcript_3/3_Confidence_0.714_Length_509_45	509	gi|151426303|dbj|AK252895.1|	1401	82.63	259	41	4	253	509	226	482	8e-57	226	Hordeum vulgare subsp. vulgare cDNA clone: FLbaf180j17, mRNA sequence.	Hordeum vulgare subsp. vulgare	GenBank-NT
23235_Transcript_1/3_Confidence_0.667_Length_1013_45	1013	CLP41_ARATH	241	62.5	160	55	2	202	678	74	229	2e-50	196	Full=Clp protease-related protein At4g12060, chloroplastic;	Arabidopsis thaliana (Mouse-ear cress).	Swiss-Prot
23237_Transcript_1/1_Confidence_1.000_Length_413_45	413	Y3264_ARATH	529	28.97	107	74	2	84	401	17	122	7e-07	49.3	Full=Putative UPF0481 protein At3g02645;	Arabidopsis thaliana (Mouse-ear cress).	Swiss-Prot
23248_Transcript_1/1_Confidence_1.000_Length_709_45	709	B9H7S5_POPTR	389	65.96	141	48	0	1	423	248	388	2e-50	200		Populus trichocarpa (Western balsam poplar) (Populus balsamifera subsp. trichocarpa).	TrEMBL
23259_Transcript_1/1_Confidence_1.000_Length_442_45	442	PSA4_ARATH	250	75	92	23	0	442	167	159	250	3e-33	137	Full=Proteasome subunit alpha type-4;	Arabidopsis thaliana (Mouse-ear cress).	Swiss-Prot
23270_Transcript_1/1_Confidence_1.000_Length_538_45	538	B9GNL9_POPTR	605	42.28	123	65	2	175	534	79	198	6e-16	84.7		Populus trichocarpa (Western balsam poplar) (Populus balsamifera subsp. trichocarpa).	TrEMBL
23291_Transcript_2/3_Confidence_0.400_Length_777_45	777	F6HAH3_VITVI	160	45.9	122	62	2	613	251	42	160	2e-11	70.5		Vitis vinifera (Grape).	TrEMBL
23296_Transcript_1/2_Confidence_1.000_Length_702_45	702	B6VAC8_MUSPR	595	73.13	67	17	1	504	701	25	91	6e-08	58.9		Musa ABB Group.	TrEMBL
232_Transcript_1/1_Confidence_1.000_Length_852_45	852	At1g06330	159	38.82	152	75	4	266	667	8	159	1e-23	108	[P] KOG1603 Copper chaperone		KOG
23315_Transcript_1/2_Confidence_1.000_Length_907_45	907	At2g04030	780	78.91	147	31	0	156	596	609	755	4e-63	239	[O] KOG0019 Molecular chaperone (HSP90 family)		KOG
23337_Transcript_1/1_Confidence_1.000_Length_470_45	470	SCAR2_ARATH	1399	47.83	92	48	0	27	302	1307	1398	1e-18	88.6	Full=Protein SCAR2;	Arabidopsis thaliana (Mouse-ear cress).	Swiss-Prot
23359_Transcript_1/1_Confidence_1.000_Length_887_45	887	B9RG45_RICCO	220	69.68	155	37	3	649	206	69	220	3e-54	213		Ricinus communis (Castor bean).	TrEMBL
2336_Transcript_1/3_Confidence_0.571_Length_728_45	728	F6HJL9_VITVI	688	31.2	234	110	8	680	117	407	635	5e-15	82.4		Vitis vinifera (Grape).	TrEMBL
23385_Transcript_1/1_Confidence_1.000_Length_335_45	335	H4_SOYBN	103	100	68	0	0	334	131	36	103	4e-33	135	Full=Histone H4;	Glycine max (Soybean) (Glycine hispida).	Swiss-Prot
23386_Transcript_1/1_Confidence_1.000_Length_313_45	313	ATL42_ARATH	432	64.29	42	15	0	303	178	249	290	2e-11	63.5	Full=E3 ubiquitin-protein ligase ATL42;	Arabidopsis thaliana (Mouse-ear cress).	Swiss-Prot
233_Transcript_1/4_Confidence_0.700_Length_2107_45	2107	RFS6_ARATH	749	78.01	382	83	1	2105	960	169	549	0	604	Full=Probable galactinol--sucrose galactosyltransferase 6;	Arabidopsis thaliana (Mouse-ear cress).	Swiss-Prot
23422_Transcript_1/1_Confidence_1.000_Length_403_45	403	At1g55840	325	42.42	66	38	0	41	238	260	325	3e-11	65.5	[I] KOG1471 Phosphatidylinositol transfer protein SEC14 and related proteins		KOG
23432_Transcript_1/1_Confidence_1.000_Length_506_45	506	At4g26360	1141	39.38	160	95	1	2	481	590	747	2e-24	110	[R] KOG1075 FOG: Reverse transcriptase		KOG
23437_Transcript_1/1_Confidence_1.000_Length_520_45	520	At3g54950	488	48.45	97	44	2	519	247	371	467	2e-15	80.5	[I] KOG0513 Ca2+-independent phospholipase A2		KOG
23438_Transcript_1/1_Confidence_1.000_Length_543_45	543	D7SIG7_VITVI	225	76.43	140	33	0	2	421	86	225	1e-54	213		Vitis vinifera (Grape).	TrEMBL
23449_Transcript_1/2_Confidence_1.000_Length_1014_45	1014	UBC16_ARATH	161	90.62	64	5	1	565	756	99	161	2e-29	126	Full=Probable ubiquitin-conjugating enzyme E2 16;	Arabidopsis thaliana (Mouse-ear cress).	Swiss-Prot
23449_Transcript_2/2_Confidence_1.000_Length_764_45	764	UBC16_ARATH	161	88.75	160	18	0	27	506	2	161	1e-84	309	Full=Probable ubiquitin-conjugating enzyme E2 16;	Arabidopsis thaliana (Mouse-ear cress).	Swiss-Prot
2345_Transcript_4/5_Confidence_0.333_Length_2878_45	2878	F6H6M7_VITVI	1079	61.11	504	189	4	1176	2666	576	1079	7e-153	543		Vitis vinifera (Grape).	TrEMBL
23462_Transcript_1/1_Confidence_1.000_Length_507_45	507	At1g72480	509	47.92	96	44	3	503	228	416	509	4e-18	89	[S] KOG2568 Predicted membrane protein		KOG
23470_Transcript_1/1_Confidence_1.000_Length_331_45	331	AB5C_ARATH	1514	46.79	109	56	2	10	330	130	238	5e-18	85.9	Full=ABC transporter C family member 5;	Arabidopsis thaliana (Mouse-ear cress).	Swiss-Prot
23479_Transcript_1/1_Confidence_1.000_Length_1421_45	1421	IF4G1_ARATH	1727	45.19	405	211	5	1	1203	1329	1726	8e-89	324	Full=Eukaryotic translation initiation factor 4G;	Arabidopsis thaliana (Mouse-ear cress).	Swiss-Prot
23480_Transcript_1/1_Confidence_1.000_Length_375_45	375	EGL1_ARATH	596	49.57	115	48	2	370	26	365	469	4e-22	99.8	Full=Transcription factor EGL1;	Arabidopsis thaliana (Mouse-ear cress).	Swiss-Prot
23483_Transcript_1/1_Confidence_1.000_Length_305_45	305	FTSZ1_ARATH	433	75.51	49	10	1	158	304	64	110	2e-06	47	Full=Cell division protein FtsZ homolog 1, chloroplastic;	Arabidopsis thaliana (Mouse-ear cress).	Swiss-Prot
23485_Transcript_1/1_Confidence_1.000_Length_792_45	792	At4g29920	1017	40.85	213	114	4	152	784	253	455	3e-37	154	[O] KOG1051 Chaperone HSP104 and related ATP-dependent Clp proteases		KOG
2349_Transcript_5/9_Confidence_0.522_Length_1949_45	1949	C5WRE9_SORBI	491	46.49	499	229	7	288	1751	20	491	1e-106	389		Sorghum bicolor (Sorghum) (Sorghum vulgare).	TrEMBL
2349_Transcript_7/9_Confidence_0.174_Length_507_45	507	GBF4_ARATH	270	39.29	168	54	5	12	500	107	231	3e-15	77.8	Full=G-box-binding factor 4;	Arabidopsis thaliana (Mouse-ear cress).	Swiss-Prot
23503_Transcript_2/2_Confidence_1.000_Length_979_45	979	At3g58760	456	63.05	203	57	4	298	897	204	391	3e-92	225	[T] KOG0192 Tyrosine kinase specific for activated (GTP-bound) p21cdc42Hs		KOG
23525_Transcript_1/1_Confidence_1.000_Length_335_45	335	ATPAM_WHEAT	509	81.93	83	15	0	333	85	427	509	2e-33	136	Full=ATP synthase subunit alpha, mitochondrial;	Triticum aestivum (Wheat).	Swiss-Prot
23536_Transcript_1/1_Confidence_1.000_Length_1017_45	1017	VIN3_ARATH	620	43.53	340	141	6	1	1017	56	345	1e-73	273	Full=Protein VERNALIZATION INSENSITIVE 3;	Arabidopsis thaliana (Mouse-ear cress).	Swiss-Prot
23537_Transcript_1/1_Confidence_1.000_Length_569_45	569	F6HMS9_VITVI	462	43.43	99	51	3	302	6	1	94	3e-08	59.3		Vitis vinifera (Grape).	TrEMBL
23557_Transcript_4/5_Confidence_0.733_Length_1745_45	1745	Q8LLD7_PlantCyc_MONOMER-11992	446	65.12	172	60	0	105	620	125	296	2e-65	244	sphingolipid long-chain base delta-8 desaturase	Aquilegia vulgaris	PlantCyc
23589_Transcript_1/1_Confidence_1.000_Length_366_45	366	C5X6S0_SORBI	1084	40.8	125	65	3	5	361	805	926	3e-16	84.7		Sorghum bicolor (Sorghum) (Sorghum vulgare).	TrEMBL
23592_Transcript_1/1_Confidence_1.000_Length_329_45	329	Q6I645_ORYSJ	368	75.68	37	8	1	119	9	298	333	1e-08	59.7		Oryza sativa subsp. japonica (Rice).	TrEMBL
23613_Transcript_1/2_Confidence_1.000_Length_784_45	784	Q75LC9_ORYSJ	550	27.08	192	120	5	213	740	15	202	1e-09	64.7		Oryza sativa subsp. japonica (Rice).	TrEMBL
23622_Transcript_3/3_Confidence_0.667_Length_1843_45	1843	At3g20810	418	60.56	213	79	3	1	627	115	326	3e-68	258	[BT] KOG2132 Uncharacterized conserved protein, contains JmjC domain		KOG
2363_Transcript_1/2_Confidence_1.000_Length_383_45	383	PUB25_ARATH	421	57.89	76	32	0	41	268	337	412	4e-09	56.6	Full=U-box domain-containing protein 25;	Arabidopsis thaliana (Mouse-ear cress).	Swiss-Prot
23642_Transcript_2/3_Confidence_0.500_Length_431_45	431	Q2PEQ3_TRIPR	458	45.45	88	39	2	431	192	369	455	3e-08	58.2		Trifolium pratense (Red clover).	TrEMBL
23645_Transcript_1/1_Confidence_1.000_Length_342_45	342	Q9LWS9_ORYSJ	205	64.15	53	18	1	4	162	154	205	5e-12	70.9		Oryza sativa subsp. japonica (Rice).	TrEMBL
23647_Transcript_1/1_Confidence_1.000_Length_1135_45	1135	LOC_OS02G35500_PlantCyc_LOC_OS02G35500.1-MONOMER	293	82.59	293	51	0	1006	128	1	293	2e-136	480	0	0	PlantCyc
23652_Transcript_1/1_Confidence_1.000_Length_1319_45	1319	FAD3C_SESIN	447	82.42	364	60	1	1309	218	88	447	2e-176	615	Full=Omega-3 fatty acid desaturase, chloroplastic;	Sesamum indicum (Oriental sesame) (Sesamum orientale).	Swiss-Prot
23657_Transcript_1/1_Confidence_1.000_Length_217_45	217	LOC_OS06G27770_PlantCyc_LOC_OS06G27770.1-MONOMER	312	92.59	27	2	0	215	135	286	312	7e-10	56.6	0	0	PlantCyc
2365_Transcript_1/3_Confidence_0.600_Length_3605_45	3605	C5WX98_SORBI	1298	75.97	1036	240	6	300	3392	267	1298	0	1551		Sorghum bicolor (Sorghum) (Sorghum vulgare).	TrEMBL
23661_Transcript_1/1_Confidence_1.000_Length_845_45	845	At1g16690	442	37.99	179	103	4	5	532	254	427	3e-21	100	[K] KOG2261 Polycomb enhancer protein, EPC		KOG
23687_Transcript_1/1_Confidence_1.000_Length_829_45	829	VSP55_ARATH	140	61.19	134	52	0	575	174	1	134	4e-39	158	Full=Vacuolar protein sorting-associated protein 55 homolog;	Arabidopsis thaliana (Mouse-ear cress).	Swiss-Prot
23688_Transcript_1/1_Confidence_1.000_Length_691_45	691	F4I1T7_ARATH	1819	45.79	214	115	1	643	2	4	216	2e-45	183		Arabidopsis thaliana (Mouse-ear cress).	TrEMBL
23690_Transcript_1/1_Confidence_1.000_Length_254_45	254	At1g26990	1425	40.7	86	49	2	253	2	550	635	2e-10	62.4	[R] KOG0017 FOG: Transposon-encoded proteins with TYA, reverse transcriptase, integrase domains in various combinations		KOG
23691_Transcript_1/2_Confidence_1.000_Length_1099_45	1099	At5g57280	289	71.03	290	80	2	163	1032	4	289	1e-106	385	[R] KOG1541 Predicted protein carboxyl methylase		KOG
23697_Transcript_1/1_Confidence_1.000_Length_1296_45	1296	WRK19_ARATH	1895	54.46	202	42	1	833	1288	78	279	1e-51	201	Full=Probable WRKY transcription factor 19;	Arabidopsis thaliana (Mouse-ear cress).	Swiss-Prot
2369_Transcript_4/5_Confidence_0.522_Length_3790_45	3790	P4KB1_ARATH	1121	56.82	1121	363	21	1	3291	98	1121	0	1071	Full=Phosphatidylinositol 4-kinase beta 1;	Arabidopsis thaliana (Mouse-ear cress).	Swiss-Prot
2369_Transcript_5/5_Confidence_0.609_Length_2417_45	2417	P4KB2_ARATH	1116	68.57	210	30	3	1286	1915	942	1115	1e-63	241	Full=Phosphatidylinositol 4-kinase 2;	Arabidopsis thaliana (Mouse-ear cress).	Swiss-Prot
23702_Transcript_1/1_Confidence_1.000_Length_324_45	324	PP448_ARATH	532	51.89	106	51	0	7	324	250	355	4e-28	119	Full=Pentatricopeptide repeat-containing protein At5g66500, mitochondrial;	Arabidopsis thaliana (Mouse-ear cress).	Swiss-Prot
23706_Transcript_1/2_Confidence_1.000_Length_770_45	770	RS15_ELAOL	153	98.56	139	2	0	101	517	15	153	4e-64	241	Full=40S ribosomal protein S15;	Elaeis oleifera (American oil palm) (Corozo oleifera).	Swiss-Prot
23753_Transcript_1/1_Confidence_1.000_Length_890_45	890	FK126_ARATH	359	33.33	96	63	1	2	286	110	205	2e-10	62.8	Full=F-box/kelch-repeat protein At1g15670;	Arabidopsis thaliana (Mouse-ear cress).	Swiss-Prot
23759_Transcript_1/1_Confidence_1.000_Length_205_45	205	LOC_OS08G23320_PlantCyc_LOC_OS08G23320.1-MONOMER	418	78.18	55	12	0	39	203	162	216	1e-20	92.4	0	0	PlantCyc
2376_Transcript_2/3_Confidence_0.500_Length_541_45	541	At5g53480	870	79	100	21	0	301	2	2	101	3e-32	136	[YU] KOG1241 Karyopherin (importin) beta 1		KOG
23777_Transcript_1/1_Confidence_1.000_Length_265_45	265	ERL1_ARATH	966	87.5	88	11	0	264	1	704	791	3e-43	169	Full=LRR receptor-like serine/threonine-protein kinase ERL1;	Arabidopsis thaliana (Mouse-ear cress).	Swiss-Prot
23799_Transcript_1/1_Confidence_1.000_Length_239_45	239	B6SVM4_MAIZE	736	97.37	38	1	0	3	116	699	736	4e-14	77.8		Zea mays (Maize).	TrEMBL
23804_Transcript_1/1_Confidence_1.000_Length_789_45	789	R18A1_ARATH	158	40.98	61	33	2	275	454	87	145	1e-06	50.1	Full=60S ribosomal protein L18a-1;	Arabidopsis thaliana (Mouse-ear cress).	Swiss-Prot
23817_Transcript_1/1_Confidence_1.000_Length_371_45	371	CADH9_ORYSJ	362	58.1	105	44	0	5	319	257	361	2e-30	127	Full=Probable cinnamyl alcohol dehydrogenase 9;	Oryza sativa subsp. japonica (Rice).	Swiss-Prot
23820_Transcript_1/1_Confidence_1.000_Length_234_45	234	At4g28080	1791	44.29	70	36	1	214	5	598	664	4e-09	58.2	[R] KOG1839 Uncharacterized protein CLU1/cluA/TIF31 involved in mitochondrial morphology/distribution, also found associated with eIF-3		KOG
23821_Transcript_1/1_Confidence_1.000_Length_235_45	235	GES_ARATH	877	44.29	70	39	0	210	1	679	748	1e-11	64.3	Full=(E,E)-geranyllinalool synthase;	Arabidopsis thaliana (Mouse-ear cress).	Swiss-Prot
2384_Transcript_1/3_Confidence_0.714_Length_480_45	480	WRK40_ARATH	302	67.35	98	32	0	365	72	117	214	3e-34	140	Full=Probable WRKY transcription factor 40;	Arabidopsis thaliana (Mouse-ear cress).	Swiss-Prot
23854_Transcript_1/1_Confidence_1.000_Length_535_45	535	BRX_ARATH	344	55.74	61	27	0	58	240	283	343	4e-17	84.3	Full=Protein BREVIS RADIX;	Arabidopsis thaliana (Mouse-ear cress).	Swiss-Prot
2386_Transcript_1/4_Confidence_0.700_Length_609_45	609	G7JND2_MEDTR	258	84.85	33	5	0	511	609	28	60	4e-09	62.4		Medicago truncatula (Barrel medic) (Medicago tribuloides).	TrEMBL
23875_Transcript_1/1_Confidence_1.000_Length_762_45	762	At4g28080	1791	48.3	265	112	7	731	3	333	594	1e-53	208	[R] KOG1839 Uncharacterized protein CLU1/cluA/TIF31 involved in mitochondrial morphology/distribution, also found associated with eIF-3		KOG
23887_Transcript_1/1_Confidence_1.000_Length_646_45	646	Q1KUZ2_9ROSI	514	54.9	51	23	0	492	644	22	72	4e-11	69.3		Cleome spinosa.	TrEMBL
23898_Transcript_1/1_Confidence_1.000_Length_241_45	241	MTBC1_VITVI	507	78.95	38	8	0	140	27	439	476	6e-10	58.9	Full=Probable bifunctional methylthioribulose-1-phosphate dehydratase/enolase-phosphatase E1 1;	Vitis vinifera (Grape).	Swiss-Prot
238_Transcript_7/10_Confidence_0.429_Length_3657_45	3657	PUM5_ARATH	961	39.84	1029	506	22	393	3383	4	951	0	633	Full=Pumilio homolog 5;	Arabidopsis thaliana (Mouse-ear cress).	Swiss-Prot
23906_Transcript_1/1_Confidence_1.000_Length_835_45	835	TIC32_PEA	316	52.55	274	127	1	834	13	46	316	4e-69	258	Full=Short-chain dehydrogenase TIC 32, chloroplastic;	Pisum sativum (Garden pea).	Swiss-Prot
23919_Transcript_1/1_Confidence_1.000_Length_775_45	775	LOC_OS09G38420_PlantCyc_LOC_OS09G38420.1-MONOMER	569	68.91	238	73	1	3	713	324	561	2e-87	317	0	0	PlantCyc
2391_Transcript_1/1_Confidence_1.000_Length_1028_45	1028	At2g16990	418	37.54	317	143	7	20	904	127	410	4e-42	170	[R] KOG2816 Predicted transporter ADD1 (major facilitator superfamily)		KOG
23936_Transcript_1/1_Confidence_1.000_Length_828_45	828	A10A5_SOYBN	93	64.44	45	16	0	393	259	25	69	7e-07	51.2	Full=Auxin-induced protein 10A5;	Glycine max (Soybean) (Glycine hispida).	Swiss-Prot
2393_Transcript_1/2_Confidence_1.000_Length_481_45	481	AB14G_ARATH	648	81.82	143	26	0	1	429	370	512	2e-69	257	Full=ABC transporter G family member 14;	Arabidopsis thaliana (Mouse-ear cress).	Swiss-Prot
2394_Transcript_1/1_Confidence_1.000_Length_2448_45	2448	RPK2_ARATH	1151	46.92	746	346	10	2255	138	46	781	4e-158	555	Full=LRR receptor-like serine/threonine-protein kinase RPK2;	Arabidopsis thaliana (Mouse-ear cress).	Swiss-Prot
23958_Transcript_1/1_Confidence_1.000_Length_392_45	392	CALS8_ARATH	1976	85.38	130	19	0	2	391	1336	1465	3e-53	203	Full=Putative callose synthase 8;	Arabidopsis thaliana (Mouse-ear cress).	Swiss-Prot
23962_Transcript_2/2_Confidence_1.000_Length_541_45	541	G7KE15_MEDTR	566	80.37	107	21	0	1	321	455	561	3e-48	191		Medicago truncatula (Barrel medic) (Medicago tribuloides).	TrEMBL
23966_Transcript_1/1_Confidence_1.000_Length_2132_45	2132	BXL6_ARATH	792	55.95	613	244	4	2130	367	180	791	0	700	Full=Probable beta-D-xylosidase 6;	Arabidopsis thaliana (Mouse-ear cress).	Swiss-Prot
2396_Transcript_1/2_Confidence_1.000_Length_2161_45	2161	UGPI6_ARATH	433	43.19	389	205	7	1640	492	29	407	6e-82	302	Full=Uncharacterized GPI-anchored protein At1g61900;	Arabidopsis thaliana (Mouse-ear cress).	Swiss-Prot
23991_Transcript_1/1_Confidence_1.000_Length_205_45	205	PMI15_ARATH	579	33.33	66	44	0	198	1	144	209	9e-06	45.1	Full=Protein PLASTID MOVEMENT IMPAIRED 15;	Arabidopsis thaliana (Mouse-ear cress).	Swiss-Prot
23998_Transcript_1/1_Confidence_1.000_Length_222_45	222	RTNLS_ARATH	487	59.68	62	25	0	187	2	225	286	1e-17	84.7	Full=Reticulon-like protein B21;	Arabidopsis thaliana (Mouse-ear cress).	Swiss-Prot
239_Transcript_3/4_Confidence_0.429_Length_410_45	410	Y5390_ARATH	523	61.29	62	22	2	187	2	332	391	2e-15	77.4	Full=Uncharacterized protein At5g03900, chloroplastic;	Arabidopsis thaliana (Mouse-ear cress).	Swiss-Prot
23_Transcript_1/1_Confidence_1.000_Length_592_45	592	F6H3L6_VITVI	305	73.38	154	31	3	592	152	154	304	5e-55	214		Vitis vinifera (Grape).	TrEMBL
24006_Transcript_1/1_Confidence_1.000_Length_245_45	245	TPSBE_ZINZE	554	87.65	81	10	0	2	244	461	541	2e-36	146	Full=Beta-eudesmol synthase;	Zingiber zerumbet (Shampoo ginger) (Amomum spurium).	Swiss-Prot
24011_Transcript_1/1_Confidence_1.000_Length_201_45	201	Q6UAL5_ORYSJ	1219	42.37	59	34	0	16	192	911	969	5e-07	54.3		Oryza sativa subsp. japonica (Rice).	TrEMBL
24012_Transcript_1/1_Confidence_1.000_Length_723_45	723	LOC_OS07G47250_PlantCyc_LOC_OS07G47250.1-MONOMER	358	68.78	189	59	0	567	1	35	223	2e-75	276	0	0	PlantCyc
2401_Transcript_2/3_Confidence_0.818_Length_2386_45	2386	TPL_ARATH	1131	66.67	45	15	0	1505	1639	521	565	4e-10	63.9	Full=Protein TOPLESS;	Arabidopsis thaliana (Mouse-ear cress).	Swiss-Prot
24025_Transcript_1/1_Confidence_1.000_Length_249_45	249	NUD19_ARATH	438	40.74	81	37	3	239	24	88	166	5e-07	49.3	Full=Nudix hydrolase 19, chloroplastic;	Arabidopsis thaliana (Mouse-ear cress).	Swiss-Prot
24031_Transcript_3/3_Confidence_0.667_Length_1436_45	1436	PPR87_ARATH	408	49.18	368	172	3	115	1176	41	407	2e-97	352	Full=Pentatricopeptide repeat-containing protein At1g61870, mitochondrial;	Arabidopsis thaliana (Mouse-ear cress).	Swiss-Prot
24050_Transcript_1/1_Confidence_1.000_Length_544_45	544	SCAM1_ARATH	282	78.63	131	28	0	2	394	133	263	5e-54	206	Full=Secretory carrier-associated membrane protein 1;	Arabidopsis thaliana (Mouse-ear cress).	Swiss-Prot
2405_Transcript_2/2_Confidence_1.000_Length_3839_45	3839	B8ADK1_ORYSI	2080	52.73	1210	453	12	3839	225	101	1196	0	1154		Oryza sativa subsp. indica (Rice).	TrEMBL
24066_Transcript_1/1_Confidence_1.000_Length_565_45	565	P2_ARATH	343	59.26	189	76	1	564	1	95	283	2e-58	221	Full=NADP-dependent alkenal double bond reductase P2;	Arabidopsis thaliana (Mouse-ear cress).	Swiss-Prot
24077_Transcript_1/1_Confidence_1.000_Length_476_45	476	E5RDD2_CUCME	373	36.29	124	61	3	4	354	114	226	3e-09	62		Cucumis melo subsp. melo.	TrEMBL
24086_Transcript_1/1_Confidence_1.000_Length_214_45	214	B9FLM3_ORYSJ	426	49.21	63	23	1	195	7	77	130	1e-07	56.2		Oryza sativa subsp. japonica (Rice).	TrEMBL
2408_Transcript_1/2_Confidence_1.000_Length_474_45	474	GSTUP_ARATH	221	56.9	58	25	0	4	177	162	219	4e-15	77	Full=Glutathione S-transferase U25;	Arabidopsis thaliana (Mouse-ear cress).	Swiss-Prot
24091_Transcript_2/3_Confidence_0.600_Length_675_45	675	CSPLO_ORYSJ	308	68.75	64	20	0	202	393	245	308	1e-07	53.1	Full=CASP-like protein Os02g0134500;	Oryza sativa subsp. japonica (Rice).	Swiss-Prot
24098_Transcript_1/1_Confidence_1.000_Length_682_45	682	Y2913_ARATH	828	41.95	236	122	7	677	3	309	540	9e-36	146	Full=G-type lectin S-receptor-like serine/threonine-protein kinase At2g19130;	Arabidopsis thaliana (Mouse-ear cress).	Swiss-Prot
24107_Transcript_1/1_Confidence_1.000_Length_566_45	566	NIK1_ARATH	638	83.68	190	28	1	563	3	374	563	2e-89	324	Full=Protein NSP-INTERACTING KINASE 1;	Arabidopsis thaliana (Mouse-ear cress).	Swiss-Prot
24129_Transcript_1/1_Confidence_1.000_Length_200_45	200	At3g58490	416	74.36	39	10	0	83	199	81	119	5e-13	71.2	[I] KOG2822 Sphingoid base-phosphate phosphatase		KOG
2414_Transcript_1/1_Confidence_1.000_Length_1109_45	1109	KITH_ORYSJ	271	76.96	204	46	1	873	265	63	266	6e-87	317	Full=Thymidine kinase;	Oryza sativa subsp. japonica (Rice).	Swiss-Prot
2415_Transcript_1/2_Confidence_1.000_Length_611_45	611	DOF56_ARATH	372	64.71	85	28	1	334	588	46	128	2e-29	125	Full=Dof zinc finger protein DOF5.6;	Arabidopsis thaliana (Mouse-ear cress).	Swiss-Prot
2416_Transcript_1/1_Confidence_1.000_Length_3564_45	3564	G7J5N6_MEDTR	785	54.95	757	336	2	2259	4	23	779	0	832		Medicago truncatula (Barrel medic) (Medicago tribuloides).	TrEMBL
2417_Transcript_6/10_Confidence_0.129_Length_791_45	791	CALM_SOLLC	149	60.87	69	22	1	175	366	81	149	2e-16	82.8	Full=Calmodulin;	Solanum lycopersicum (Tomato) (Lycopersicon esculentum).	Swiss-Prot
24186_Transcript_1/1_Confidence_1.000_Length_435_45	435	GSTFA_ARATH	215	36.81	144	79	5	25	435	1	139	4e-18	87	Full=Glutathione S-transferase F10;	Arabidopsis thaliana (Mouse-ear cress).	Swiss-Prot
24197_Transcript_1/1_Confidence_1.000_Length_205_45	205	AGO16_ORYSJ	883	59.32	59	24	0	178	2	391	449	3e-16	79.7	Full=Protein argonaute 16;	Oryza sativa subsp. japonica (Rice).	Swiss-Prot
241_Transcript_1/2_Confidence_1.000_Length_2619_45	2619	At1g60200	781	48	375	131	8	1397	2401	430	780	3e-77	288	[A] KOG2253 U1 snRNP complex, subunit SNU71 and related PWI-motif proteins		KOG
24222_Transcript_3/3_Confidence_0.600_Length_1133_45	1133	LOC_OS08G19140_PlantCyc_LOC_OS08G19140.1-MONOMER	539	65.52	348	118	2	1131	88	189	534	3e-134	473	0	0	PlantCyc
2423_Transcript_4/6_Confidence_0.600_Length_2112_45	2112	PATL3_ARATH	490	61.62	271	97	4	1310	513	150	418	4e-109	327	Full=Patellin-3;	Arabidopsis thaliana (Mouse-ear cress).	Swiss-Prot
24246_Transcript_1/1_Confidence_1.000_Length_370_45	370	At1g63640	1056	43.43	99	51	3	85	369	873	970	2e-11	66.2	[Z] KOG0239 Kinesin (KAR3 subfamily)		KOG
2427_Transcript_4/4_Confidence_0.375_Length_1106_45	1106	At5g02230	280	64.66	283	97	2	145	993	1	280	3e-103	373	[R] KOG3109 Haloacid dehalogenase-like hydrolase		KOG
24311_Transcript_2/4_Confidence_0.500_Length_930_45	930	VATL1_ARATH	164	99.39	164	1	0	802	311	1	164	1e-57	220	Full=V-type proton ATPase 16 kDa proteolipid subunit c1/c3/c5;	Arabidopsis thaliana (Mouse-ear cress).	Swiss-Prot
24340_Transcript_1/1_Confidence_1.000_Length_251_45	251	At3g52490	815	34.07	91	51	1	5	250	711	801	1e-06	49.7	[O] KOG1051 Chaperone HSP104 and related ATP-dependent Clp proteases		KOG
24347_Transcript_1/1_Confidence_1.000_Length_318_45	318	CET1_TOBAC	174	70.19	104	31	0	6	317	25	128	1e-43	170	Full=CEN-like protein 1;	Nicotiana tabacum (Common tobacco).	Swiss-Prot
2434_Transcript_1/2_Confidence_1.000_Length_1334_45	1334	GRP8_ARATH	169	46.34	82	43	1	1302	1060	5	86	1e-15	80.9	Full=Glycine-rich RNA-binding protein 8;	Arabidopsis thaliana (Mouse-ear cress).	Swiss-Prot
24374_Transcript_1/1_Confidence_1.000_Length_375_45	375	At3g01400	355	62.22	45	17	0	4	138	279	323	8e-10	60.5	[S] KOG0167 FOG: Armadillo/beta-catenin-like repeats		KOG
24392_Transcript_2/3_Confidence_0.600_Length_704_45	704	DNJ39_ARATH	414	46.55	58	26	2	254	427	25	77	3e-06	48.5	Full=Chaperone protein dnaJ 39;	Arabidopsis thaliana (Mouse-ear cress).	Swiss-Prot
24394_Transcript_1/1_Confidence_1.000_Length_855_45	855	F6H3G9_VITVI	411	32.48	274	118	8	5	628	122	394	3e-24	113		Vitis vinifera (Grape).	TrEMBL
24399_Transcript_1/1_Confidence_1.000_Length_1019_45	1019	WAK5_ARATH	733	33.93	112	61	3	560	886	224	325	3e-14	75.9	Full=Wall-associated receptor kinase 5;	Arabidopsis thaliana (Mouse-ear cress).	Swiss-Prot
24401_Transcript_1/1_Confidence_1.000_Length_265_45	265	At1g04160	1519	60.98	41	16	0	181	59	839	879	2e-10	62.4	[Z] KOG0160 Myosin class V heavy chain		KOG
2441_Transcript_2/6_Confidence_0.688_Length_2133_45	2133	RIK_ARATH	578	34.91	169	93	4	1	486	288	446	1e-06	52.4	Full=Protein RIK;	Arabidopsis thaliana (Mouse-ear cress).	Swiss-Prot
24450_Transcript_1/2_Confidence_1.000_Length_480_45	480	GDL66_ARATH	351	45.78	83	45	0	478	230	265	347	1e-20	95.5	Full=GDSL esterase/lipase At4g26790;	Arabidopsis thaliana (Mouse-ear cress).	Swiss-Prot
2445_Transcript_4/6_Confidence_0.643_Length_4526_45	4526	Q5Z9G6_ORYSJ	257	77.67	103	23	0	457	765	147	249	1e-38	164		Oryza sativa subsp. japonica (Rice).	TrEMBL
24464_Transcript_1/1_Confidence_1.000_Length_460_45	460	G7ZWU5_MEDTR	1280	69.64	56	17	0	3	170	839	894	2e-15	82.4		Medicago truncatula (Barrel medic) (Medicago tribuloides).	TrEMBL
[truncated: 31,337 more rows]
